# Supplementary material for: Circulating tumour cells from patients with colorectal cancer have cancer stem cell hallmarks in ex vivo culture
Source: PubMed Central journal article supplement — Gut. 2016 Jul 25;66(10):1802–10. doi: 10.1136/gutjnl-2016-311447 (PMC5595103; doi:10.1136/gutjnl-2016-311447), 2016-07-25
Supplement: gutjnl-2016-311447supp001.pdf [file gutjnl-2016-311447supp001.pdf]

**Supplementary Table 1: Types of congenital abnormalities (CAs) in the 32 children fathered by men treated with AZA/6-MP within three months before conception.**

| <b>Types of CAs according to ICD-10* classification</b> | <b>Number (%)**</b> |
|---------------------------------------------------------|---------------------|
| CAs within the nervous system [DQ00-DQ07]               | 1 (2.5)             |
| CAs within eye, ear, face and neck [DQ10-DQ18]          | 1 (2.5)             |
| CAs within circulation organs [DQ20-DQ28]               | 7 (17.5)            |
| CAs in the respiratory organs [DQ30-DQ34]               | 2 (5.0)             |
| Cleft lip and palate [DQ35-DQ37]                        | 1 (2.5)             |
| Other CAs in the digestive organs [DQ38-DQ45]           | 7 (17.5)            |
| CAs in the genital organs [DQ50-DQ56]                   | 1 (2.5)             |
| CAs in the urinary system [DQ60-DQ64]                   | 4 (10.0)            |
| CAs in the bones and muscles [DQ65-DQ79]                | 11 (27.5)           |
| Other CAs [DQ80-DQ89]                                   | 3 (7.5)             |
| Chromosome anomalies [DQ90-DQ99]                        | 2 (5.0)             |
| <b>Total</b>                                            | <b>40 (100)</b>     |

Ad \*ICD= International classification of diseases, version 10

Ad \*\* each of the 32 children with CAs might have more than one type of congenital abnormality
