# Supplementary material for: Circulating tumour cells from patients with colorectal cancer have cancer stem cell hallmarks in ex vivo culture
Source: PubMed Central journal article supplement — Gut. 2016 Jul 25;66(10):1802–10. doi: 10.1136/gutjnl-2016-311447 (PMC5595103; doi:10.1136/gutjnl-2016-311447), 2016-07-25
Supplement: gutjnl-2016-311447supp002.pdf [file gutjnl-2016-311447supp002.pdf]

**Supplementary, Table 2:** Characteristics of children fathered by men with inflammatory bowel disease (IBD) treated with azathioprine (AZA)/6-mercaptopurine (6-MP) three months prior to the conception, singleton births from 1997 through 2013.

| Singleton children fathered by men with IBD treated<br>with AZA/6-MP three months before conception<br>N=514 |                  |
|--------------------------------------------------------------------------------------------------------------|------------------|
| Mother's age at time of childbirth (year)                                                                    |                  |
| Median (SD), 25-75 percentiles                                                                               | 30 (4.21), 27-33 |
| Mother's age in categories (years)                                                                           |                  |
| < 25, N (%)                                                                                                  | 51 (9.9)         |
| 25-29, N (%)                                                                                                 | 174 (33.9)       |
| ≥ 30, N (%)                                                                                                  | 289 (56.2)       |
| Mother's BMI (kg/m <sup>2</sup> )                                                                            |                  |
| < 18.5, N (%)                                                                                                | 14 (2.7)         |
| 18.5-24.9, N (%)                                                                                             | 248 (48.3)       |
| 25-29.9, N (%)                                                                                               | 89 (17.3)        |
| ≥ 30, N (%)                                                                                                  | 42 (8.2)         |
| Father's age at time of childbirth (year)                                                                    |                  |
| Median (SD), 25-75 percentiles                                                                               | 32 (5.33), 29-36 |
| Father's age in categories (years)                                                                           |                  |
| < 25, N (%)                                                                                                  | 19 (3.7)         |

|                                                     |            |
|-----------------------------------------------------|------------|
| 25-29, N (%)                                        | 131 (25.5) |
| ≥ 30, N (%)                                         | 364 (70.8) |
| Mother's smoking at start of pregnancy <sup>a</sup> |            |
| no, N (%)                                           | 444 (86.4) |
| yes, N (%)                                          | 60 (11.7)  |
| Mother's parity <sup>a</sup>                        |            |
| 1                                                   | 234 (45.8) |
| > 1                                                 | 277 (53.9) |
| Calendar period year of child birth (years)         |            |
| 1997-2001, N (%)                                    | 69 (13.4)  |
| 2002-2006, N (%)                                    | 124 (24.1) |
| 2007-2013, N (%)                                    | 321 (62.5) |

---

a) Missing (%): smoking for exposed cohort of fathers with underlying disease of IBD 10/514= 1.9%, parity for exposed cohort of fathers with underlying disease of IBD 3/514=0.6%.
