# Supplementary material for: Circulating tumour cells from patients with colorectal cancer have cancer stem cell hallmarks in ex vivo culture
Source: PubMed Central journal article supplement — Gut. 2016 Jul 25;66(10):1802–10. doi: 10.1136/gutjnl-2016-311447 (PMC5595103; doi:10.1136/gutjnl-2016-311447), 2016-07-25
Supplement: gutjnl-2016-311447supp003.pdf [file gutjnl-2016-311447supp003.pdf]

Grillet et al., Supplementary Table 3

| Gene_symbol   | Variant     | Chromosome | Coordinate | Type      | Genotype | Exonic | Transcript     |
|---------------|-------------|------------|------------|-----------|----------|--------|----------------|
| MTOR          | C>C/T       | 1          | 11181327   | snv       | het      | yes    | NM_004958.3    |
| MTOR          | G>G/A       | 1          | 11190646   | snv       | het      | yes    | NM_004958.3    |
| MTOR,MTOR-AS1 | C>C/T       | 1          | 11205058   | snv       | het      | yes    | NR_046600.1    |
| MTOR          | G>G/A       | 1          | 11288758   | snv       | het      | yes    | NM_004958.3    |
| MTOR          | A>A/G       | 1          | 11301714   | snv       | het      | yes    | NM_004958.3    |
| MTOR          | C>C/G       | 1          | 11322565   | snv       | het      | yes    | NM_004958.3    |
| NRAS          | TA>T/T      | 1          | 115247749  | deletion  | hom      | yes    | NM_002524.4    |
| NRAS          | G>A/A       | 1          | 115249843  | snv       | hom      | yes    | NM_002524.4    |
| B4GALT3       | C>C/G       | 1          | 161141432  | snv       | het      | yes    | NM_001199873.1 |
| ELF3          | C>C/G       | 1          | 201981218  | snv       | het      | yes    | NM_001114309.1 |
| ELF3          | T>T/C       | 1          | 201981862  | snv       | het      | yes    | NM_001114309.1 |
| ELF3          | G>A/A       | 1          | 201985731  | snv       | hom      | yes    | NM_001114309.1 |
| N/A           | C>C/T       | 2          | 25451789   | snv       | het      | no     | NM_022552.4    |
| N/A           | G>G/A       | 2          | 25455389   | snv       | het      | no     | NM_022552.4    |
| DNMT3A        | G>G/A       | 2          | 25536827   | snv       | het      | yes    | NM_022552.4    |
| DNMT3A        | C>C/T       | 2          | 25537252   | snv       | het      | no     | NM_022552.4    |
| ACVR2A        | G>A/A       | 2          | 148657117  | snv       | hom      | yes    | NM_001616.3    |
| ACVR2A        | G>GTT/GTT   | 2          | 148686946  | insertion | hom      | yes    | NM_001616.3    |
| NFE2L2        | TGGC>TGGC/T | 2          | 178129390  | deletion  | het      | yes    | NM_006164.4    |
| SF3B1         | T>C/C       | 2          | 198257795  | snv       | hom      | yes    | NM_012433.2    |
| SF3B1         | A>G/G       | 2          | 198265526  | snv       | hom      | yes    | NM_012433.2    |
| SF3B1         | T>C/C       | 2          | 198283305  | snv       | hom      | yes    | NM_012433.2    |
| IDH1          | C>A/A       | 2          | 209101311  | snv       | hom      | yes    | NM_005896.2    |
| ERBB4         | C>T/T       | 2          | 212241725  | snv       | hom      | yes    | NM_005235.2    |
| ERBB4         | A>C/C       | 2          | 212242192  | snv       | hom      | yes    | NM_005235.2    |
| ERBB4         | G>A/A       | 2          | 212242641  | snv       | hom      | yes    | NM_005235.2    |
| ERBB4         | G>C/C       | 2          | 212242745  | snv       | hom      | yes    | NM_005235.2    |
| ERBB4         | T>C/C       | 2          | 212243011  | snv       | hom      | yes    | NM_005235.2    |
| ERBB4         | G>A/A       | 2          | 212243422  | snv       | hom      | yes    | NM_005235.2    |
| ERBB4         | G>A/A       | 2          | 212244403  | snv       | hom      | yes    | NM_005235.2    |
| ERBB4         | C>T/T       | 2          | 212244657  | snv       | hom      | yes    | NM_005235.2    |
| ERBB4         | T>C/C       | 2          | 212244718  | snv       | hom      | yes    | NM_005235.2    |
| ERBB4         | A>AG/AG     | 2          | 212244761  | insertion | hom      | yes    | NM_005235.2    |
| ERBB4         | G>G/T       | 2          | 212244852  | snv       | het      | yes    | NM_005235.2    |
| ERBB4         | G>A/A       | 2          | 212244952  | snv       | hom      | yes    | NM_005235.2    |

Grillet et al., Supplementary Table 3

|        |                               |   |           |           |     |     |                |
|--------|-------------------------------|---|-----------|-----------|-----|-----|----------------|
| ERBB4  | C>CTGAAAATAGGAT/CTGAAAATAGGAT | 2 | 212245090 | insertion | hom | yes | NM_005235.2    |
| ERBB4  | GCCC>GCCC/G                   | 2 | 212245092 | deletion  | het | yes | NM_005235.2    |
| ERBB4  | C>C/A                         | 2 | 212245093 | snv       | het | yes | NM_005235.2    |
| ERBB4  | A>G/G                         | 2 | 212245284 | snv       | hom | yes | NM_005235.2    |
| ERBB4  | A>G/G                         | 2 | 212245489 | snv       | hom | yes | NM_005235.2    |
| ERBB4  | C>T/T                         | 2 | 212247834 | snv       | hom | yes | NM_005235.2    |
| N/A    | C>T/T                         | 2 | 213403863 | snv       | hom | no  | NM_005235.2    |
| VHL    | G>G/A                         | 3 | 10183337  | snv       | het | yes | NM_000551.3    |
| VHL    | G>G/A                         | 3 | 10191943  | snv       | het | yes | NM_000551.3    |
| VHL    | G>G/A                         | 3 | 10192672  | snv       | het | yes | NM_000551.3    |
| VHL    | C>C/T                         | 3 | 10192709  | snv       | het | yes | NM_000551.3    |
| VHL    | T>C/C                         | 3 | 10192762  | snv       | hom | yes | NM_000551.3    |
| VHL    | A>G/G                         | 3 | 10193509  | snv       | hom | yes | NM_000551.3    |
| VHL    | G>C/C                         | 3 | 10194624  | snv       | hom | yes | NM_000551.3    |
| VHL    | T>TG/TG                       | 3 | 10195293  | insertion | hom | yes | NM_000551.3    |
| VHL    | T>G/G                         | 3 | 10195298  | snv       | hom | yes | NM_000551.3    |
| VHL    | T>T/G                         | 3 | 10195298  | snv       | het | yes | NM_000551.3    |
| VHL    | T>G/G                         | 3 | 10195303  | snv       | hom | yes | NM_000551.3    |
| N/A    | T>T/C                         | 3 | 10195407  | snv       | het | no  | NM_000551.3    |
| N/A    | A>C/C                         | 3 | 10195485  | snv       | hom | no  | NM_000551.3    |
| N/A    | C>C/T                         | 3 | 10195704  | snv       | het | no  | NM_000551.3    |
| CTNNB1 | T>T/G                         | 3 | 41281388  | snv       | het | yes | NM_001098210.1 |
| CTNNB1 | AT>ATT/A                      | 3 | 41281412  | insertion | het | yes | NM_001098210.1 |
| CTNNB1 | AT>A/ATT                      | 3 | 41281412  | insertion | het | yes | NM_001098210.1 |
| CTNNB1 | T>T/A                         | 3 | 41281413  | snv       | het | yes | NM_001098210.1 |
| CTNNB1 | C>C/CTAAT                     | 3 | 41281600  | insertion | het | yes | NM_001098210.1 |
| SETD2  | A>G/G                         | 3 | 47058057  | snv       | hom | yes | NM_014159.6    |
| SETD2  | C>C/T                         | 3 | 47162316  | snv       | het | yes | NM_014159.6    |
| PBRM1  | T>T/C                         | 3 | 52581435  | snv       | het | yes | NM_018313.4    |
| PBRM1  | T>T/C                         | 3 | 52584787  | snv       | het | yes | NM_018313.4    |
| PBRM1  | T>T/A                         | 3 | 52610651  | snv       | het | yes | NM_018313.4    |
| PBRM1  | T>T/C                         | 3 | 52643685  | snv       | het | yes | NM_018313.4    |
| PBRM1  | C>C/T                         | 3 | 52719816  | snv       | het | yes | NM_018313.4    |
| EPHA3  | T>T/TA                        | 3 | 89448886  | insertion | het | yes | NM_005233.5    |
| EPHA3  | T>T/TTG                       | 3 | 89448888  | insertion | het | yes | NM_005233.5    |
| EPHA3  | T>T/A                         | 3 | 89448936  | snv       | het | yes | NM_005233.5    |
| EPHA3  | G>G/A                         | 3 | 89521664  | snv       | het | yes | NM_005233.5    |

Grillet et al., Supplementary Table 3

|        |                   |   |           |           |     |     |             |
|--------|-------------------|---|-----------|-----------|-----|-----|-------------|
| EPHA3  | T>T/C             | 3 | 89521693  | snv       | het | yes | NM_005233.5 |
| EPHA3  | C>C/A             | 3 | 89530057  | snv       | het | yes | NM_005233.5 |
| POLQ   | T>C/C             | 3 | 121154974 | snv       | hom | yes | NM_199420.3 |
| POLQ   | T>T/C             | 3 | 121208176 | snv       | het | yes | NM_199420.3 |
| POLQ   | G>C/C             | 3 | 121208833 | snv       | hom | yes | NM_199420.3 |
| POLQ   | G>A/A             | 3 | 121238749 | snv       | hom | yes | NM_199420.3 |
| POLQ   | C>A/A             | 3 | 121263720 | snv       | hom | yes | NM_199420.3 |
| ATR    | C>T/T             | 3 | 142168331 | snv       | hom | yes | NM_001184.3 |
| ATR    | A>A/G             | 3 | 142169844 | snv       | het | no  | NM_001184.3 |
| ATR    | A>A/C             | 3 | 142170863 | snv       | het | no  | NM_001184.3 |
| ATR    | C>C/T             | 3 | 142171193 | snv       | het | no  | NM_001184.3 |
| ATR    | A>A/G             | 3 | 142171303 | snv       | het | no  | NM_001184.3 |
| ATR    | A>A/T             | 3 | 142171691 | snv       | het | no  | NM_001184.3 |
| ATR    | G>G/A             | 3 | 142215233 | snv       | het | yes | NM_001184.3 |
| ATR    | A>A/G             | 3 | 142217537 | snv       | het | yes | NM_001184.3 |
| ATR    | C>C/T             | 3 | 142268372 | snv       | het | yes | NM_001184.3 |
| ATR    | C>C/T             | 3 | 142269075 | snv       | het | yes | NM_001184.3 |
| ATR    | C>C/T             | 3 | 142275353 | snv       | het | yes | NM_001184.3 |
| ATR    | A>A/T             | 3 | 142277575 | snv       | het | yes | NM_001184.3 |
| ATR    | T>T/C             | 3 | 142280108 | snv       | het | yes | NM_001184.3 |
| ATR    | C>C/T             | 3 | 142281298 | snv       | het | yes | NM_001184.3 |
| ATR    | A>A/G             | 3 | 142281612 | snv       | het | yes | NM_001184.3 |
| MECOM  | C>C/A             | 3 | 168801495 | snv       | het | yes | NM_004991.3 |
| MECOM  | T>A/A             | 3 | 168864550 | snv       | hom | yes | NM_004991.3 |
| MECOM  | A>C/C             | 3 | 168864643 | snv       | hom | yes | NM_004991.3 |
| MECOM  | C>C/T             | 3 | 168865151 | snv       | het | yes | NM_004991.3 |
| PIK3CA | T>T/A             | 3 | 178921553 | snv       | het | yes | NM_006218.2 |
| CRIPAK | A>A/G             | 4 | 1385501   | snv       | het | yes | NM_175918.3 |
| CRIPAK | A>A/G             | 4 | 1386652   | snv       | het | yes | NM_175918.3 |
| CRIPAK | A>A/G             | 4 | 1387298   | snv       | het | yes | NM_175918.3 |
| CRIPAK | TTAGA>T/TTAGATAGA | 4 | 1387362   | insertion | het | yes | NM_175918.3 |
| CRIPAK | TTAGA>TTAGATAGA/T | 4 | 1387362   | insertion | het | yes | NM_175918.3 |
| CRIPAK | A>G/G             | 4 | 1387780   | snv       | hom | yes | NM_175918.3 |
| CRIPAK | C>G/G             | 4 | 1388115   | snv       | hom | yes | NM_175918.3 |
| CRIPAK | A>G/G             | 4 | 1388583   | snv       | hom | yes | NM_175918.3 |
| CRIPAK | C>C/T             | 4 | 1388666   | snv       | het | yes | NM_175918.3 |
| CRIPAK | C>C/G             | 4 | 1388693   | snv       | het | yes | NM_175918.3 |

Grillet et al., Supplementary Table 3

|        |           |   |           |          |     |     |                |
|--------|-----------|---|-----------|----------|-----|-----|----------------|
| CRIPAK | C>C/T     | 4 | 1388697   | snv      | het | yes | NM_175918.3    |
| CRIPAK | C>C/T     | 4 | 1388728   | snv      | het | yes | NM_175918.3    |
| CRIPAK | C>C/G     | 4 | 1388755   | snv      | het | yes | NM_175918.3    |
| CRIPAK | T>T/C     | 4 | 1388757   | snv      | het | yes | NM_175918.3    |
| CRIPAK | C>C/T     | 4 | 1388759   | snv      | het | yes | NM_175918.3    |
| CRIPAK | G>G/C     | 4 | 1388786   | snv      | het | yes | NM_175918.3    |
| CRIPAK | C>C/T     | 4 | 1388788   | snv      | het | yes | NM_175918.3    |
| CRIPAK | A>A/C     | 4 | 1388867   | snv      | het | yes | NM_175918.3    |
| CRIPAK | T>T/C     | 4 | 1388952   | snv      | het | yes | NM_175918.3    |
| CRIPAK | T>T/C     | 4 | 1388953   | snv      | het | yes | NM_175918.3    |
| CRIPAK | C>C/T     | 4 | 1388976   | snv      | het | yes | NM_175918.3    |
| CRIPAK | C>C/T     | 4 | 1389007   | snv      | het | yes | NM_175918.3    |
| CRIPAK | G>G/A     | 4 | 1389037   | snv      | het | yes | NM_175918.3    |
| CRIPAK | T>T/C     | 4 | 1389156   | snv      | het | yes | NM_175918.3    |
| FGFR3  | G>A/A     | 4 | 1807894   | snv      | hom | yes | NM_001163213.1 |
| FGFR3  | C>T/T     | 4 | 1809787   | snv      | hom | yes | NM_001163213.1 |
| HTT    | G>G/A     | 4 | 3076657   | snv      | het | yes | NM_002111.6    |
| HTT    | T>T/G     | 4 | 3076696   | snv      | het | yes | NM_002111.6    |
| PDGFRA | CAG>CAG/C | 4 | 55095488  | deletion | het | yes | NM_006206.4    |
| PDGFRA | T>T/C     | 4 | 55130078  | snv      | het | yes | NM_006206.4    |
| PDGFRA | C>C/T     | 4 | 55131118  | snv      | het | yes | NM_006206.4    |
| PDGFRA | T>T/G     | 4 | 55133726  | snv      | het | yes | NM_006206.4    |
| PDGFRA | T>T/C     | 4 | 55139771  | snv      | het | yes | NM_006206.4    |
| PDGFRA | A>G/G     | 4 | 55141055  | snv      | hom | yes | NM_006206.4    |
| PDGFRA | G>G/A     | 4 | 55143577  | snv      | het | yes | NM_006206.4    |
| PDGFRA | C>C/T     | 4 | 55147769  | snv      | het | no  | NM_006206.4    |
| PDGFRA | C>C/T     | 4 | 55152040  | snv      | het | yes | NM_006206.4    |
| PDGFRA | T>C/C     | 4 | 55161391  | snv      | hom | yes | NM_006206.4    |
| PDGFRA | A>G/G     | 4 | 55161517  | snv      | hom | yes | NM_006206.4    |
| PDGFRA | A>A/C     | 4 | 55161813  | snv      | het | yes | NM_006206.4    |
| PDGFRA | C>A/A     | 4 | 55162950  | snv      | hom | yes | NM_006206.4    |
| PDGFRA | T>G/G     | 4 | 55163826  | snv      | hom | yes | NM_006206.4    |
| TET2   | C>C/T     | 4 | 106156187 | snv      | het | yes | NM_001127208.2 |
| TET2   | T>T/G     | 4 | 106159582 | snv      | het | yes | NM_001127208.2 |
| TET2   | T>A/A     | 4 | 106159644 | snv      | hom | yes | NM_001127208.2 |
| TET2   | G>G/A     | 4 | 106160133 | snv      | het | yes | NM_001127208.2 |
| TET2   | G>G/T     | 4 | 106160231 | snv      | het | yes | NM_001127208.2 |

Grillet et al., Supplementary Table 3

|        |          |   |           |           |     |     |                |
|--------|----------|---|-----------|-----------|-----|-----|----------------|
| TET2   | T>T/G    | 4 | 106160239 | snv       | het | yes | NM_001127208.2 |
| TET2   | G>G/T    | 4 | 106160244 | snv       | het | yes | NM_001127208.2 |
| TET2   | A>A/C    | 4 | 106160365 | snv       | het | yes | NM_001127208.2 |
| TET2   | T>T/G    | 4 | 106196829 | snv       | het | yes | NM_001127208.2 |
| TET2   | A>A/G    | 4 | 106196951 | snv       | het | yes | NM_001127208.2 |
| TET2   | A>A/T    | 4 | 106199505 | snv       | het | yes | NM_001127208.2 |
| FBXW7  | C>C/A    | 4 | 153244077 | snv       | het | yes | NM_033632.3    |
| FBXW7  | C>C/T    | 4 | 153303509 | snv       | het | yes | NM_033632.3    |
| FBXW7  | T>G/G    | 4 | 153332380 | snv       | hom | yes | NM_033632.3    |
| FBXW7  | A>G/G    | 4 | 153456102 | snv       | hom | yes | NM_033632.3    |
| LIFR   | G>G/A    | 5 | 38475507  | snv       | het | yes | NM_001127671.1 |
| LIFR   | T>T/C    | 5 | 38476027  | snv       | het | yes | NM_001127671.1 |
| LIFR   | G>G/C    | 5 | 38477863  | snv       | het | yes | NM_001127671.1 |
| LIFR   | A>A/C    | 5 | 38480227  | snv       | het | yes | NM_001127671.1 |
| LIFR   | C>C/T    | 5 | 38481335  | snv       | het | yes | NM_001127671.1 |
| LIFR   | C>C/T    | 5 | 38550281  | snv       | het | no  | NM_001127671.1 |
| MAP3K1 | G>G/C    | 5 | 56110937  | snv       | het | yes | NM_005921.1    |
| MAP3K1 | G>T/T    | 5 | 56110992  | snv       | hom | yes | NM_005921.1    |
| MAP3K1 | A>C/C    | 5 | 56111087  | snv       | hom | yes | NM_005921.1    |
| MAP3K1 | G>C/C    | 5 | 56111751  | snv       | hom | yes | NM_005921.1    |
| MAP3K1 | G>A/A    | 5 | 56161787  | snv       | hom | yes | NM_005921.1    |
| MAP3K1 | G>A/A    | 5 | 56177443  | snv       | hom | yes | NM_005921.1    |
| MAP3K1 | G>A/A    | 5 | 56177743  | snv       | hom | yes | NM_005921.1    |
| MAP3K1 | TCAA>T/T | 5 | 56177848  | deletion  | hom | yes | NM_005921.1    |
| MAP3K1 | A>C/C    | 5 | 56178217  | snv       | hom | yes | NM_005921.1    |
| MAP3K1 | C>C/T    | 5 | 56190109  | snv       | het | yes | NM_005921.1    |
| MAP3K1 | G>A/A    | 5 | 56190531  | snv       | hom | yes | NM_005921.1    |
| MAP3K1 | A>G/G    | 5 | 56190986  | snv       | hom | yes | NM_005921.1    |
| MAP3K1 | TTG>T/T  | 5 | 56191191  | deletion  | hom | yes | NM_005921.1    |
| MAP3K1 | T>T/A    | 5 | 56191200  | snv       | het | yes | NM_005921.1    |
| MAP3K1 | CA>CAA/C | 5 | 56191803  | insertion | het | yes | NM_005921.1    |
| MAP3K1 | CA>C/CAA | 5 | 56191803  | insertion | het | yes | NM_005921.1    |
| PIK3R1 | A>A/G    | 5 | 67584357  | snv       | het | yes | NM_181523.2    |
| PIK3R1 | G>G/A    | 5 | 67588148  | snv       | het | yes | NM_181523.2    |
| PIK3R1 | C>C/T    | 5 | 67593432  | snv       | het | yes | NM_181523.2    |
| PIK3R1 | C>C/T    | 5 | 67594303  | snv       | het | yes | NM_181523.2    |
| PIK3R1 | CTG>C/C  | 5 | 67595172  | deletion  | hom | yes | NM_181523.2    |

Grillet et al., Supplementary Table 3

|           |               |   |           |          |     |     |                |
|-----------|---------------|---|-----------|----------|-----|-----|----------------|
| PIK3R1    | C>C/A         | 5 | 67595861  | snv      | het | yes | NM_181523.2    |
| PIK3R1    | G>A/A         | 5 | 67596088  | snv      | hom | yes | NM_181523.2    |
| PIK3R1    | C>C/T         | 5 | 67596206  | snv      | het | yes | NM_181523.2    |
| PIK3R1    | C>C/T         | 5 | 67596365  | snv      | het | yes | NM_181523.2    |
| PIK3R1    | AAGTT>AAGTT/A | 5 | 67596920  | deletion | het | yes | NM_181523.2    |
| PIK3R1    | C>C/T         | 5 | 67596933  | snv      | het | yes | NM_181523.2    |
| APC       | T>T/C         | 5 | 112162854 | snv      | het | yes | NM_000038.5    |
| APC       | G>G/A         | 5 | 112164561 | snv      | het | yes | NM_000038.5    |
| APC       | C>C/T         | 5 | 112164586 | snv      | het | yes | NM_000038.5    |
| APC       | C>C/T         | 5 | 112175639 | snv      | het | yes | NM_000038.5    |
| APC       | G>G/A         | 5 | 112175770 | snv      | het | yes | NM_000038.5    |
| APC       | G>G/A         | 5 | 112176325 | snv      | het | yes | NM_000038.5    |
| APC       | T>T/G         | 5 | 112176559 | snv      | het | yes | NM_000038.5    |
| APC       | T>A/A         | 5 | 112176756 | snv      | hom | yes | NM_000038.5    |
| APC       | G>G/A         | 5 | 112177171 | snv      | het | yes | NM_000038.5    |
| APC       | T>T/C         | 5 | 112180921 | snv      | het | yes | NM_000038.5    |
| APC       | C>C/G         | 5 | 112181379 | snv      | het | yes | NM_000038.5    |
| APC       | G>G/A         | 5 | 112181576 | snv      | het | yes | NM_000038.5    |
| NSD1      | C>C/T         | 5 | 176636882 | snv      | het | yes | NM_022455.4    |
| NSD1      | G>G/A         | 5 | 176637149 | snv      | het | yes | NM_022455.4    |
| NSD1      | G>G/T         | 5 | 176637240 | snv      | het | yes | NM_022455.4    |
| NSD1      | T>T/C         | 5 | 176637576 | snv      | het | yes | NM_022455.4    |
| NSD1      | T>T/C         | 5 | 176721198 | snv      | het | yes | NM_022455.4    |
| NSD1      | T>T/C         | 5 | 176726002 | snv      | het | yes | NM_022455.4    |
| NSD1      | G>G/A         | 5 | 176726635 | snv      | het | yes | NM_022455.4    |
| ATXN1     | A>A/C         | 6 | 16327909  | snv      | het | yes | NM_001128164.1 |
| ATXN1     | C>C/A         | 6 | 16327912  | snv      | het | yes | NM_001128164.1 |
| ATXN1     | A>A/C         | 6 | 16327915  | snv      | het | yes | NM_001128164.1 |
| ATXN1     | C>C/A         | 6 | 16327921  | snv      | het | yes | NM_001128164.1 |
| ATXN1     | C>C/A         | 6 | 16327927  | snv      | het | yes | NM_001128164.1 |
| HIST1H1C  | G>C/C         | 6 | 26056072  | snv      | hom | yes | NM_005319.3    |
| HIST1H1C  | A>G/G         | 6 | 26056549  | snv      | hom | yes | NM_005319.3    |
| HIST1H2BD | T>C/C         | 6 | 26171250  | snv      | hom | yes | NM_138720.2    |
| CDKN1A    | T>C/C         | 6 | 36654351  | snv      | hom | yes | NM_001220777.1 |
| TBP       | A>A/G         | 6 | 170871040 | snv      | het | yes | NM_003194.4    |
| TBP       | G>G/A         | 6 | 170871043 | snv      | het | yes | NM_003194.4    |
| TBP       | A>A/G         | 6 | 170871046 | snv      | het | yes | NM_003194.4    |

Grillet et al., Supplementary Table 3

|               |                |   |           |           |     |     |             |
|---------------|----------------|---|-----------|-----------|-----|-----|-------------|
| TBP           | G>G/A          | 6 | 170871049 | snv       | het | yes | NM_003194.4 |
| EGFR          | C>T/T          | 7 | 55214348  | snv       | hom | yes | NM_005228.3 |
| EGFR          | G>G/A          | 7 | 55229255  | snv       | het | yes | NM_005228.3 |
| EGFR          | G>G/A          | 7 | 55238268  | snv       | het | yes | NM_005228.3 |
| EGFR          | T>T/G          | 7 | 55238464  | snv       | het | yes | NM_005228.3 |
| EGFR          | T>T/A          | 7 | 55238874  | snv       | het | yes | NM_005228.3 |
| EGFR,EGFR-AS1 | G>A/A          | 7 | 55249063  | snv       | hom | yes | NR_047551.1 |
| EGFR          | T>C/C          | 7 | 55266417  | snv       | hom | yes | NM_005228.3 |
| N/A           | A>G/G          | 7 | 55276010  | snv       | hom | no  | NM_005228.3 |
| N/A           | C>C/T          | 7 | 55277387  | snv       | het | no  | NM_005228.3 |
| N/A           | C>C/G          | 7 | 55277626  | snv       | het | no  | NM_005228.3 |
| HGF           | C>C/T          | 7 | 81359051  | snv       | het | yes | NM_000601.4 |
| HGF           | A>G/G          | 7 | 81372047  | snv       | hom | yes | NM_000601.4 |
| HGF           | A>G/G          | 7 | 81372156  | snv       | hom | yes | NM_000601.4 |
| HGF           | C>T/T          | 7 | 81380574  | snv       | hom | yes | NM_000601.4 |
| HGF           | T>TG/TG        | 7 | 81380812  | insertion | hom | yes | NM_000601.4 |
| HGF           | C>C/G          | 7 | 81380813  | snv       | het | yes | NM_000601.4 |
| HGF           | CATAGACA>C/C   | 7 | 81380814  | deletion  | hom | yes | NM_000601.4 |
| HGF           | T>T/G          | 7 | 81381038  | snv       | het | yes | NM_000601.4 |
| HGF           | C>T/T          | 7 | 81381326  | snv       | hom | yes | NM_000601.4 |
| PIK3CG        | A>G/G          | 7 | 106508978 | snv       | hom | yes | NM_002649.2 |
| PIK3CG        | T>C/C          | 7 | 106508987 | snv       | hom | yes | NM_002649.2 |
| PIK3CG        | C>C/T          | 7 | 106513011 | snv       | het | yes | NM_002649.2 |
| PIK3CG        | C>C/T          | 7 | 106546087 | snv       | het | yes | NM_002649.2 |
| PIK3CG        | G>G/A          | 7 | 106546657 | snv       | het | yes | NM_002649.2 |
| PIK3CG        | C>C/T          | 7 | 106547276 | snv       | het | yes | NM_002649.2 |
| PIK3CG        | CT>CTT/C       | 7 | 106547276 | insertion | het | yes | NM_002649.2 |
| PIK3CG        | CT>C/CTT       | 7 | 106547276 | insertion | het | yes | NM_002649.2 |
| PIK3CG        | G>G/C          | 7 | 106547469 | snv       | het | yes | NM_002649.2 |
| N/A           | A>A/G          | 7 | 106547921 | snv       | het | no  | NM_002649.2 |
| BRAF          | A>A/T          | 7 | 140453136 | snv       | het | yes | NM_004333.4 |
| EPHB6         | G>G/A          | 7 | 142552876 | snv       | het | yes | NM_004445.3 |
| EPHB6         | G>G/A          | 7 | 142558891 | snv       | het | yes | NM_004445.3 |
| EPHB6         | C>CCCTCCT/CCCT | 7 | 142562051 | insertion | het | yes | NM_004445.3 |
| EPHB6         | C>CCCT/CCCTCCT | 7 | 142562051 | insertion | het | yes | NM_004445.3 |
| EPHB6         | T>T/G          | 7 | 142563253 | snv       | het | yes | NM_004445.3 |
| EPHB6         | G>G/A          | 7 | 142565385 | snv       | het | yes | NM_004445.3 |

Grillet et al., Supplementary Table 3

|        |           |   |           |           |     |     |                |
|--------|-----------|---|-----------|-----------|-----|-----|----------------|
| EPHB6  | G>G/A     | 7 | 142565776 | snv       | het | yes | NM_004445.3    |
| EPHB6  | TC>TC/T   | 7 | 142568770 | deletion  | het | yes | NM_004445.3    |
| EZH2   | AG>AG/A   | 7 | 148504716 | deletion  | het | yes | NM_004456.4    |
| KMT2C  | C>C/A     | 7 | 151832435 | snv       | het | yes | NM_170606.2    |
| KMT2C  | T>T/G     | 7 | 151882657 | snv       | het | yes | NM_170606.2    |
| KMT2C  | C>C/A     | 7 | 151927021 | snv       | het | yes | NM_170606.2    |
| KMT2C  | A>A/G     | 7 | 151927025 | snv       | het | yes | NM_170606.2    |
| KMT2C  | T>T/C     | 7 | 151927026 | snv       | het | yes | NM_170606.2    |
| KMT2C  | T>T/C     | 7 | 151932908 | snv       | het | yes | NM_170606.2    |
| KMT2C  | C>C/T     | 7 | 151945007 | snv       | het | yes | NM_170606.2    |
| KMT2C  | C>C/T     | 7 | 151945140 | snv       | het | yes | NM_170606.2    |
| KMT2C  | G>G/T     | 7 | 151945167 | snv       | het | yes | NM_170606.2    |
| KMT2C  | T>T/A     | 7 | 151962176 | snv       | het | yes | NM_170606.2    |
| KMT2C  | T>T/A     | 7 | 151970856 | snv       | het | yes | NM_170606.2    |
| KMT2C  | G>G/A     | 7 | 151970931 | snv       | het | yes | NM_170606.2    |
| EGR3   | T>C/C     | 8 | 22546561  | snv       | hom | yes | NM_004430.2    |
| EGR3   | G>A/A     | 8 | 22547052  | snv       | hom | yes | NM_004430.2    |
| SOX17  | T>T/G     | 8 | 55372660  | snv       | het | yes | NM_022454.3    |
| RAD21  | G>A/A     | 8 | 117858389 | snv       | hom | yes | NM_006265.2    |
| RAD21  | C>CAT/CAT | 8 | 117858606 | insertion | hom | yes | NM_006265.2    |
| RAD21  | A>A/G     | 8 | 117864217 | snv       | het | yes | NM_006265.2    |
| EPPK1  | G>G/A     | 8 | 144940300 | snv       | het | yes | NM_031308.1    |
| EPPK1  | G>G/C     | 8 | 144940777 | snv       | het | yes | NM_031308.1    |
| EPPK1  | G>G/A     | 8 | 144940779 | snv       | het | yes | NM_031308.1    |
| EPPK1  | G>G/C     | 8 | 144941181 | snv       | het | yes | NM_031308.1    |
| EPPK1  | C>C/T     | 8 | 144941419 | snv       | het | yes | NM_031308.1    |
| EPPK1  | T>C/C     | 8 | 144942903 | snv       | hom | yes | NM_031308.1    |
| EPPK1  | C>C/T     | 8 | 144944161 | snv       | het | yes | NM_031308.1    |
| EPPK1  | T>C/C     | 8 | 144944176 | snv       | hom | yes | NM_031308.1    |
| EPPK1  | G>G/A     | 8 | 144944638 | snv       | het | yes | NM_031308.1    |
| EPPK1  | T>T/C     | 8 | 144945191 | snv       | het | yes | NM_031308.1    |
| EPPK1  | T>C/C     | 8 | 144945792 | snv       | hom | yes | NM_031308.1    |
| EPPK1  | C>T/T     | 8 | 144946252 | snv       | hom | yes | NM_031308.1    |
| EPPK1  | G>G/A     | 8 | 144946345 | snv       | het | yes | NM_031308.1    |
| EPPK1  | C>C/T     | 8 | 144946818 | snv       | het | yes | NM_031308.1    |
| CDKN2A | C>G/G     | 9 | 21968199  | snv       | hom | yes | NM_001195132.1 |
| CDKN2A | C>T/T     | 9 | 21975017  | snv       | hom | yes | NM_001195132.1 |



Grillet et al., Supplementary Table 3

|                    |           |    |           |          |     |     |                |
|--------------------|-----------|----|-----------|----------|-----|-----|----------------|
| TLR4               | G>G/C     | 9  | 120478131 | snv      | het | yes | NM_138554.4    |
| NOTCH1             | A>A/G     | 9  | 139389184 | snv      | het | yes | NM_017617.3    |
| NOTCH1             | C>C/T     | 9  | 139390397 | snv      | het | yes | NM_017617.3    |
| NOTCH1             | G>G/A     | 9  | 139391636 | snv      | het | yes | NM_017617.3    |
| NOTCH1             | G>G/A     | 9  | 139397707 | snv      | het | yes | NM_017617.3    |
| NOTCH1             | A>A/G     | 9  | 139407932 | snv      | het | yes | NM_017617.3    |
| NOTCH1             | A>A/G     | 9  | 139418260 | snv      | het | yes | NM_017617.3    |
| GATA3              | C>C/T     | 10 | 8100647   | snv      | het | yes | NM_001002295.1 |
| GATA3              | G>G/A     | 10 | 8116598   | snv      | het | yes | NM_001002295.1 |
| ARID5B             | C>G/G     | 10 | 63852965  | snv      | hom | yes | NM_032199.2    |
| PTEN               | G>G/A     | 10 | 89623716  | snv      | het | yes | NM_000314.4    |
| PTEN               | CT>C/C    | 10 | 89623860  | deletion | hom | yes | NM_000314.4    |
| PTEN               | G>C/C     | 10 | 89623901  | snv      | hom | yes | NM_000314.4    |
| SMC3               | A>G/G     | 10 | 112361870 | snv      | hom | yes | NM_005445.3    |
| FGFR2              | G>A/A     | 10 | 123239112 | snv      | hom | yes | NM_022970.3    |
| FGFR2              | C>T/T     | 10 | 123241373 | snv      | hom | yes | NM_022970.3    |
| FGFR2              | T>C/C     | 10 | 123241496 | snv      | hom | yes | NM_022970.3    |
| FGFR2              | T>C/C     | 10 | 123298158 | snv      | hom | yes | NM_022970.3    |
| FGFR2              | C>G/T     | 10 | 123357561 | snv      | het | yes | NM_022970.3    |
| FGFR2              | C>T/G     | 10 | 123357561 | snv      | het | yes | NM_022970.3    |
| LOC100996515,CCND1 | G>G/C     | 11 | 69456000  | snv      | het | yes | NM_053056.2    |
| LOC100996515,CCND1 | C>C/T     | 11 | 69462856  | snv      | het | yes | NM_053056.2    |
| LOC100996515,CCND1 | G>G/A     | 11 | 69462910  | snv      | het | yes | NM_053056.2    |
| LOC100996515,CCND1 | C>C/A     | 11 | 69466115  | snv      | het | yes | NM_053056.2    |
| LOC100996515,CCND1 | C>C/G     | 11 | 69466737  | snv      | het | yes | NM_053056.2    |
| ATM                | G>G/A     | 11 | 108093833 | snv      | het | yes | NM_000051.3    |
| ATM                | C>C/T     | 11 | 108117798 | snv      | het | yes | NM_000051.3    |
| ATM                | A>G/G     | 11 | 108183167 | snv      | hom | yes | NM_000051.3    |
| ATM                | G>G/T     | 11 | 108236783 | snv      | het | yes | NM_000051.3    |
| ATM                | C>C/T     | 11 | 108237839 | snv      | het | yes | NM_000051.3    |
| ATM                | G>G/T     | 11 | 108239628 | snv      | het | yes | NM_000051.3    |
| CDKN1B             | T>T/C     | 12 | 12870695  | snv      | het | yes | NM_004064.3    |
| CDKN1B             | T>T/G     | 12 | 12871099  | snv      | het | yes | NM_004064.3    |
| CDKN1B             | C>C/A     | 12 | 12874917  | snv      | het | yes | NM_004064.3    |
| KRAS               | A>A/T     | 12 | 25358650  | snv      | het | yes | NM_033360.2    |
| KRAS               | CTT>CTT/C | 12 | 25358662  | deletion | het | yes | NM_033360.2    |
| KRAS               | T>T/G     | 12 | 25358828  | snv      | het | yes | NM_033360.2    |

Grillet et al., Supplementary Table 3

|       |         |    |          |          |     |     |                |
|-------|---------|----|----------|----------|-----|-----|----------------|
| KRAS  | T>T/C   | 12 | 25358943 | snv      | het | yes | NM_033360.2    |
| KRAS  | A>A/T   | 12 | 25359227 | snv      | het | yes | NM_033360.2    |
| KRAS  | A>A/T   | 12 | 25359328 | snv      | het | yes | NM_033360.2    |
| KRAS  | G>G/A   | 12 | 25359352 | snv      | het | yes | NM_033360.2    |
| KRAS  | TA>TA/T | 12 | 25359464 | deletion | het | yes | NM_033360.2    |
| KRAS  | T>T/C   | 12 | 25359841 | snv      | het | yes | NM_033360.2    |
| KRAS  | T>C/C   | 12 | 25360138 | snv      | hom | yes | NM_033360.2    |
| KRAS  | G>G/A   | 12 | 25361074 | snv      | het | yes | NM_033360.2    |
| KRAS  | T>C/C   | 12 | 25361091 | snv      | hom | yes | NM_033360.2    |
| KRAS  | A>A/G   | 12 | 25361142 | snv      | het | yes | NM_033360.2    |
| KRAS  | T>T/C   | 12 | 25361646 | snv      | het | yes | NM_033360.2    |
| KRAS  | A>A/G   | 12 | 25362217 | snv      | het | yes | NM_033360.2    |
| KRAS  | G>A/A   | 12 | 25362465 | snv      | hom | yes | NM_033360.2    |
| KRAS  | A>A/C   | 12 | 25362552 | snv      | het | yes | NM_033360.2    |
| KRAS  | A>A/G   | 12 | 25362777 | snv      | het | yes | NM_033360.2    |
| KRAS  | T>T/C   | 12 | 25368084 | snv      | het | no  | NM_033360.2    |
| KRAS  | C>T/T   | 12 | 25368462 | snv      | hom | yes | NM_033360.2    |
| H3F3C | A>A/C   | 12 | 31944691 | snv      | het | yes | NM_001013699.2 |
| LRRK2 | G>A/A   | 12 | 40619082 | snv      | hom | yes | NM_198578.3    |
| LRRK2 | T>T/C   | 12 | 40631791 | snv      | het | yes | NM_198578.3    |
| LRRK2 | C>C/G   | 12 | 40657700 | snv      | het | yes | NM_198578.3    |
| LRRK2 | G>G/A   | 12 | 40702911 | snv      | het | yes | NM_198578.3    |
| LRRK2 | G>G/A   | 12 | 40702987 | snv      | het | yes | NM_198578.3    |
| LRRK2 | C>A/A   | 12 | 40713834 | snv      | hom | yes | NM_198578.3    |
| LRRK2 | A>G/G   | 12 | 40713873 | snv      | hom | yes | NM_198578.3    |
| LRRK2 | T>C/C   | 12 | 40716260 | snv      | hom | yes | NM_198578.3    |
| LRRK2 | T>C/C   | 12 | 40758652 | snv      | hom | yes | NM_198578.3    |
| LRRK2 | T>T/C   | 12 | 40761663 | snv      | het | yes | NM_198578.3    |
| LRRK2 | A>C/C   | 12 | 40761931 | snv      | hom | yes | NM_198578.3    |
| LRRK2 | C>T/T   | 12 | 40761951 | snv      | hom | yes | NM_198578.3    |
| LRRK2 | G>C/C   | 12 | 40762303 | snv      | hom | yes | NM_198578.3    |
| LRRK2 | T>C/C   | 12 | 40762546 | snv      | hom | yes | NM_198578.3    |
| KMT2D | G>G/A   | 12 | 49424534 | snv      | het | yes | NM_003482.3    |
| KMT2D | T>T/C   | 12 | 49425978 | snv      | het | yes | NM_003482.3    |
| KMT2D | C>C/T   | 12 | 49427652 | snv      | het | yes | NM_003482.3    |
| KMT2D | C>C/A   | 12 | 49434074 | snv      | het | yes | NM_003482.3    |
| KMT2D | G>G/A   | 12 | 49444545 | snv      | het | yes | NM_003482.3    |

Grillet et al., Supplementary Table 3

|        |              |    |           |           |     |     |                |
|--------|--------------|----|-----------|-----------|-----|-----|----------------|
| ACVR1B | TGCG>T/T     | 12 | 52345497  | deletion  | hom | yes | NM_020328.3    |
| N/A    | G>G/T        | 12 | 78224730  | snv       | het | no  | NM_014903.4    |
| N/A    | A>C/C        | 12 | 78224774  | snv       | hom | no  | NM_014903.4    |
| N/A    | C>C/G        | 12 | 78224949  | snv       | het | no  | NM_014903.4    |
| N/A    | G>G/C        | 12 | 78224967  | snv       | het | no  | NM_014903.4    |
| N/A    | G>G/C        | 12 | 78224973  | snv       | het | no  | NM_014903.4    |
| N/A    | C>C/G        | 12 | 78224975  | snv       | het | no  | NM_014903.4    |
| NAV3   | T>T/C        | 12 | 78225110  | snv       | het | yes | NM_014903.4    |
| NAV3   | C>C/A        | 12 | 78225186  | snv       | het | yes | NM_014903.4    |
| NAV3   | A>G/G        | 12 | 78225374  | snv       | hom | yes | NM_014903.4    |
| NAV3   | G>G/A        | 12 | 78530979  | snv       | het | yes | NM_014903.4    |
| NAV3   | C>C/T        | 12 | 78604578  | snv       | het | yes | NM_014903.4    |
| NAV3   | T>T/C        | 12 | 78605172  | snv       | het | yes | NM_014903.4    |
| NAV3   | A>A/G        | 12 | 78605435  | snv       | het | yes | NM_014903.4    |
| TBX3   | T>C/C        | 12 | 115108907 | snv       | hom | yes | NM_016569.3    |
| FLT3   | G>T/T        | 13 | 28577688  | snv       | hom | yes | NM_004119.2    |
| FLT3   | G>G/A        | 13 | 28624294  | snv       | het | yes | NM_004119.2    |
| FLT3   | G>A/A        | 13 | 28636084  | snv       | hom | yes | NM_004119.2    |
| BRCA2  | G>G/A        | 13 | 32890572  | snv       | het | yes | NM_000059.3    |
| BRCA2  | A>A/G        | 13 | 32911888  | snv       | het | yes | NM_000059.3    |
| BRCA2  | T>T/C        | 13 | 32912299  | snv       | het | yes | NM_000059.3    |
| BRCA2  | A>G/G        | 13 | 32913055  | snv       | hom | yes | NM_000059.3    |
| BRCA2  | G>C/C        | 13 | 32915005  | snv       | hom | yes | NM_000059.3    |
| BRCA2  | A>A/G        | 13 | 32929232  | snv       | het | yes | NM_000059.3    |
| BRCA2  | T>C/C        | 13 | 32929387  | snv       | hom | yes | NM_000059.3    |
| BRCA2  | A>A/C        | 13 | 32973012  | snv       | het | yes | NM_000059.3    |
| BRCA2  | A>A/G        | 13 | 32973439  | snv       | het | yes | NM_000059.3    |
| FOXA1  | CAA>CAAA/C   | 14 | 38058924  | insertion | het | yes | NM_004496.3    |
| FOXA1  | CAA>C/CAAA   | 14 | 38058924  | insertion | het | yes | NM_004496.3    |
| FOXA1  | CAAA>CAAAA/C | 14 | 38058924  | insertion | het | yes | NM_004496.3    |
| FOXA1  | CAAA>C/CAAAA | 14 | 38058924  | insertion | het | yes | NM_004496.3    |
| FOXA1  | C>T/T        | 14 | 38061742  | snv       | hom | yes | NM_004496.3    |
| FOXA1  | G>G/C        | 14 | 38064215  | snv       | het | yes | NM_004496.3    |
| AKT1   | C>T/T        | 14 | 105239894 | snv       | hom | yes | NM_001014431.1 |
| AKT1   | C>C/A        | 14 | 105259734 | snv       | het | yes | NM_001014431.1 |
| TP53   | G>G/A        | 17 | 7572154   | snv       | het | yes | NM_000546.5    |
| TP53   | C>T/T        | 17 | 7578645   | snv       | hom | yes | NM_000546.5    |

Grillet et al., Supplementary Table 3

|            |           |    |          |           |     |     |                |
|------------|-----------|----|----------|-----------|-----|-----|----------------|
| TP53       | G>C/C     | 17 | 7579472  | snv       | hom | yes | NM_000546.5    |
| TP53       | G>C/C     | 17 | 7579801  | snv       | hom | yes | NM_000546.5    |
| NCOR1      | C>C/T     | 17 | 15994888 | snv       | het | yes | NM_006311.3    |
| NCOR1      | C>C/T     | 17 | 16068340 | snv       | het | yes | NM_006311.3    |
| NCOR1      | G>G/A     | 17 | 16068343 | snv       | het | yes | NM_006311.3    |
| NCOR1      | C>C/T     | 17 | 16068362 | snv       | het | yes | NM_006311.3    |
| NCOR1      | C>C/G     | 17 | 16068377 | snv       | het | yes | NM_006311.3    |
| NCOR1      | G>G/A     | 17 | 16068383 | snv       | het | yes | NM_006311.3    |
| NCOR1      | G>G/A     | 17 | 16068396 | snv       | het | yes | NM_006311.3    |
| NF1        | G>A/A     | 17 | 29508775 | snv       | hom | yes | NM_001042492.2 |
| NF1        | T>C/C     | 17 | 29704002 | snv       | hom | yes | NM_001042492.2 |
| N/A        | T>C/C     | 17 | 29705947 | snv       | hom | no  | NM_001042492.2 |
| CDK12      | A>G/G     | 17 | 37687968 | snv       | hom | yes | NM_016507.2    |
| CDK12      | C>C/T     | 17 | 37688361 | snv       | het | yes | NM_016507.2    |
| CDK12      | C>C/G     | 17 | 37688387 | snv       | het | yes | NM_016507.2    |
| CDK12      | C>C/G     | 17 | 37688391 | snv       | het | yes | NM_016507.2    |
| CDK12      | C>C/G     | 17 | 37688393 | snv       | het | yes | NM_016507.2    |
| VEZF1      | C>G/G     | 17 | 56056550 | snv       | hom | yes | NM_007146.2    |
| BZRAP1-AS1 | G>G/C     | 17 | 56409089 | snv       | het | no  | NR_038410.1    |
| AXIN2      | A>T/T     | 17 | 63525082 | snv       | hom | yes | NM_004655.3    |
| AXIN2      | G>A/A     | 17 | 63533768 | snv       | hom | yes | NM_004655.3    |
| AXIN2      | T>C/C     | 17 | 63533789 | snv       | hom | yes | NM_004655.3    |
| AXIN2      | G>G/A     | 17 | 63554591 | snv       | het | yes | NM_004655.3    |
| AXIN2      | A>A/G     | 17 | 63556093 | snv       | het | no  | NM_004655.3    |
| AXIN2      | G>G/A     | 17 | 63556290 | snv       | het | no  | NM_004655.3    |
| AXIN2      | C>C/G     | 17 | 63556402 | snv       | het | no  | NM_004655.3    |
| AXIN2      | C>C/T     | 17 | 63556961 | snv       | het | no  | NM_004655.3    |
| SOX9       | C>C/T     | 17 | 70118935 | snv       | het | yes | NM_000346.3    |
| SOX9       | C>C/CA    | 17 | 70120429 | insertion | het | yes | NM_000346.3    |
| SOX9       | A>A/C     | 17 | 70120551 | snv       | het | yes | NM_000346.3    |
| SOX9       | A>A/G     | 17 | 70121339 | snv       | het | yes | NM_000346.3    |
| SOX9       | G>G/A     | 17 | 70122108 | snv       | het | yes | NM_000346.3    |
| N/A        | G>G/A     | 18 | 42259867 | snv       | het | no  | NM_015559.2    |
| N/A        | G>G/A     | 18 | 42259876 | snv       | het | no  | NM_015559.2    |
| SETBP1     | G>G/A     | 18 | 42456653 | snv       | het | yes | NM_015559.2    |
| SETBP1     | C>C/CTCTT | 18 | 42456670 | insertion | het | yes | NM_015559.2    |
| SETBP1     | A>A/T     | 18 | 42457353 | snv       | het | yes | NM_015559.2    |

Grillet et al., Supplementary Table 3

|        |               |    |          |           |     |     |             |
|--------|---------------|----|----------|-----------|-----|-----|-------------|
| SETBP1 | C>C/A         | 18 | 42532693 | snv       | het | yes | NM_015559.2 |
| SETBP1 | A>G/G         | 18 | 42533130 | snv       | hom | yes | NM_015559.2 |
| SETBP1 | C>C/G         | 18 | 42647496 | snv       | het | yes | NM_015559.2 |
| SMAD2  | C>CTTAT/CTTAT | 18 | 45361016 | insertion | hom | yes | NM_005901.5 |
| SMAD2  | G>G/A         | 18 | 45365336 | snv       | het | yes | NM_005901.5 |
| SMAD2  | A>G/G         | 18 | 45367484 | snv       | hom | yes | NM_005901.5 |
| SMAD4  | C>C/T         | 18 | 48591918 | snv       | het | yes | NM_005359.5 |
| SMAD4  | C>C/T         | 18 | 48603032 | snv       | het | yes | NM_005359.5 |
| SMAD4  | A>A/G         | 18 | 48606959 | snv       | het | yes | NM_005359.5 |
| SMAD4  | G>G/A         | 18 | 48609920 | snv       | het | yes | NM_005359.5 |
| SMAD4  | G>G/A         | 18 | 48610382 | snv       | het | yes | NM_005359.5 |
| TSHZ3  | A>A/G         | 19 | 31768416 | snv       | het | yes | NM_020856.2 |
| TSHZ3  | G>G/A         | 19 | 31769763 | snv       | het | yes | NM_020856.2 |
| TSHZ3  | AG>A/A        | 19 | 31840190 | deletion  | hom | yes | NM_020856.2 |
| KMT2B  | A>AG/AG       | 19 | 36214632 | insertion | hom | yes | NM_014727.1 |
| KMT2B  | A>A/C         | 19 | 36224218 | snv       | het | yes | NM_014727.1 |
| KMT2B  | T>T/C         | 19 | 36224224 | snv       | het | yes | NM_014727.1 |
| KMT2B  | A>A/G         | 19 | 36224705 | snv       | het | yes | NM_014727.1 |
| PRX    | C>T/T         | 19 | 40900865 | snv       | hom | yes | NM_181882.2 |
| PRX    | T>T/C         | 19 | 40901496 | snv       | het | yes | NM_181882.2 |
| PRX    | A>A/G         | 19 | 40901604 | snv       | het | yes | NM_181882.2 |
| PRX    | A>A/G         | 19 | 40901614 | snv       | het | yes | NM_181882.2 |
| ERCC2  | C>C/T         | 19 | 45867259 | snv       | het | yes | NM_000400.3 |
| ERCC2  | T>T/G         | 19 | 45868309 | snv       | het | yes | NM_000400.3 |
| FOXA2  | T>C/C         | 20 | 22562674 | snv       | hom | yes | NM_021784.4 |
| ASXL1  | T>C/C         | 20 | 31022959 | snv       | hom | yes | NM_015338.5 |
| ASXL1  | T>T/C         | 20 | 31024274 | snv       | het | yes | NM_015338.5 |
| ASXL1  | A>A/G         | 20 | 31025163 | snv       | het | yes | NM_015338.5 |
| ASXL1  | T>T/C         | 20 | 31025231 | snv       | het | yes | NM_015338.5 |
| ASXL1  | A>A/G         | 20 | 31025535 | snv       | het | yes | NM_015338.5 |
| ASXL1  | G>G/C         | 20 | 31025689 | snv       | het | yes | NM_015338.5 |
| TSHZ2  | C>C/G         | 20 | 51802068 | snv       | het | yes | NM_173485.5 |
| TSHZ2  | T>C/C         | 20 | 51802132 | snv       | hom | yes | NM_173485.5 |
| TSHZ2  | T>C/C         | 20 | 51870849 | snv       | hom | yes | NM_173485.5 |
| TSHZ2  | C>T/T         | 20 | 52104352 | snv       | hom | yes | NM_173485.5 |
| TSHZ2  | C>T/T         | 20 | 52105972 | snv       | hom | yes | NM_173485.5 |
| TSHZ2  | C>A/A         | 20 | 52110876 | snv       | hom | yes | NM_173485.5 |

Grillet et al., Supplementary Table 3

|       |             |   |    |           |           |     |     |                |
|-------|-------------|---|----|-----------|-----------|-----|-----|----------------|
| TSHZ2 | A>A/C       |   | 20 | 52111752  | snv       | het | yes | NM_173485.5    |
| RUNX1 | G>G/T       |   | 21 | 36164405  | snv       | het | yes | NM_001754.4    |
| RUNX1 | T>T/C       |   | 21 | 36193871  | snv       | het | yes | NM_001754.4    |
| U2AF1 | T>G/G       |   | 21 | 44527669  | snv       | hom | yes | NM_001025203.1 |
| EP300 | T>A/A       |   | 22 | 41551039  | snv       | hom | yes | NM_001429.3    |
| EP300 | C>C/G       |   | 22 | 41573406  | snv       | het | yes | NM_001429.3    |
| EP300 | TGTA>TGTA/T |   | 22 | 41574969  | deletion  | het | yes | NM_001429.3    |
| EP300 | A>A/C       |   | 22 | 41575882  | snv       | het | yes | NM_001429.3    |
| EP300 | T>T/C       |   | 22 | 41575884  | snv       | het | yes | NM_001429.3    |
| EP300 | A>A/C       |   | 22 | 41575886  | snv       | het | yes | NM_001429.3    |
| EP300 | A>A/C       |   | 22 | 41575888  | snv       | het | yes | NM_001429.3    |
| EP300 | A>A/C       |   | 22 | 41575890  | snv       | het | yes | NM_001429.3    |
| EP300 | A>A/T       |   | 22 | 41575892  | snv       | het | yes | NM_001429.3    |
| USP9X | A>T/T       | X |    | 41093413  | snv       | hom | yes | NM_001039590.2 |
| KDM5C | G>T/T       | X |    | 53220836  | snv       | hom | yes | NM_004187.3    |
| KDM5C | T>TG/TG     | X |    | 53221259  | insertion | hom | yes | NM_004187.3    |
| KDM5C | A>AC/AC     | X |    | 53222043  | insertion | hom | yes | NM_004187.3    |
| AR    | T>G/G       | X |    | 66863091  | snv       | hom | yes | NM_000044.3    |
| AR    | T>C/C       | X |    | 66914801  | snv       | hom | no  | NM_000044.3    |
| AR    | G>G/A       | X |    | 66915615  | snv       | het | no  | NM_000044.3    |
| AR    | T>C/C       | X |    | 66945740  | snv       | hom | yes | NM_000044.3    |
| AR    | T>C/C       | X |    | 66946851  | snv       | hom | yes | NM_000044.3    |
| AR    | C>T/T       | X |    | 66949722  | snv       | hom | yes | NM_000044.3    |
| AR    | TAAG>T/T    | X |    | 66950022  | deletion  | hom | yes | NM_000044.3    |
| AR    | C>T/T       | X |    | 66950105  | snv       | hom | yes | NM_000044.3    |
| STAG2 | G>G/A       | X |    | 123094494 | snv       | het | yes | NM_001042749.1 |
| PHF6  | G>A/A       | X |    | 133561242 | snv       | hom | yes | NM_032458.2    |

Grillet et al., Supplementary Table 3

| Consequence                             | cDNA Position | Amino Acids | Codons  | dbSNP ID               | Ancestral Allele |
|-----------------------------------------|---------------|-------------|---------|------------------------|------------------|
| synonymous_variant                      | 7030          | L           | ctG/ctA | rs11121691             | C                |
| synonymous_variant                      | 5674          | S           | agC/agT | rs2275527              | G                |
| intron_variant, nc_transcript_variant   | 0             |             |         | rs1057079              | C                |
| synonymous_variant                      | 3118          | N           | aaC/aaT | rs1064261              | A                |
| synonymous_variant                      | 1558          | D           | gaT/gaC | rs1135172              | G                |
| 5_prime_UTR_variant                     | 44            |             |         | rs2295079              | C                |
| 3_prime_UTR_variant, feature_truncation | 3789          |             |         | rs61652108             |                  |
| 3_prime_UTR_variant                     | 1696          |             |         | rs14804                | A                |
| 3_prime_UTR_variant                     | 2083          |             |         | rs6779                 | C                |
| synonymous_variant                      | 564           | G           | ggC/ggG | rs11543979             | G                |
| synonymous_variant                      | 840           | P           | ccT/ccC | rs2819362              | t                |
| 3_prime_UTR_variant                     | 2663          |             |         | rs1130193              | A                |
| downstream_gene_variant                 | 0             |             |         | rs74580656             | C                |
| downstream_gene_variant                 | 0             |             |         | rs752208               | G                |
| synonymous_variant                      | 294           | P           | ccC/ccT | rs41284843             | G                |
| intron_variant                          | 0             |             |         |                        |                  |
| synonymous_variant                      | 506           | P           | ccG/ccA | rs1128919              | G                |
| 3_prime_UTR_variant, feature_elongation |               |             |         | rs34380358, rs80225730 |                  |
| 5_prime_UTR_variant, feature_truncation |               |             |         | rs143406266            |                  |
| synonymous_variant                      | 3705          | V           | gtA/gtG | rs4685                 | C                |
| synonymous_variant                      | 2679          | G           | ggT/ggC | rs788018               | G                |
| synonymous_variant                      | 471           | K           | aaA/aaG | rs788023               | C                |
| 3_prime_UTR_variant                     | 1971          |             |         | rs6730955              | A                |
| 3_prime_UTR_variant                     | 10640         |             |         | rs1595066              | C                |
| 3_prime_UTR_variant                     | 10173         |             |         | rs11895168             | A                |
| 3_prime_UTR_variant                     | 9724          |             |         | rs1595065              | A                |
| 3_prime_UTR_variant                     | 9620          |             |         | rs1595064              | G                |
| 3_prime_UTR_variant                     | 9354          |             |         | rs16845990             | T                |
| 3_prime_UTR_variant                     | 8943          |             |         | rs1972820              | A                |
| 3_prime_UTR_variant                     | 7962          |             |         | rs10932374             | G                |
| 3_prime_UTR_variant                     | 7708          |             |         | rs12467225             | C                |
| 3_prime_UTR_variant                     | 7647          |             |         | rs12471583             | T                |
| 3_prime_UTR_variant, feature_elongation |               |             |         | rs34217661             |                  |
| 3_prime_UTR_variant                     | 7513          |             |         |                        |                  |
| 3_prime_UTR_variant                     | 7413          |             |         | rs1836724              | A                |

Grillet et al., Supplementary Table 3

|                                         |      |     |         |                    |               |
|-----------------------------------------|------|-----|---------|--------------------|---------------|
| 3_prime_UTR_variant, feature_elongation |      |     |         | rs11274444         | CTGAAAATAGGAT |
| 3_prime_UTR_variant, feature_truncation |      |     |         |                    |               |
| 3_prime_UTR_variant                     | 7272 |     |         |                    |               |
| 3_prime_UTR_variant                     | 7081 |     |         | rs12475523         | G             |
| 3_prime_UTR_variant                     | 6876 |     |         | rs4672612          | G             |
| 3_prime_UTR_variant                     | 4531 |     |         | rs3748960          | T             |
| upstream_gene_variant                   | 0    |     |         | rs6735267          | C             |
| 5_prime_UTR_variant                     | 19   |     |         | rs779805           | G             |
| 3_prime_UTR_variant                     | 1149 |     |         | rs1642742          | G             |
| 3_prime_UTR_variant                     | 1878 |     |         | rs1681669          | G             |
| 3_prime_UTR_variant                     | 1915 |     |         | rs1681668          | C             |
| 3_prime_UTR_variant                     | 1968 |     |         | rs1642741          | C             |
| 3_prime_UTR_variant                     | 2715 |     |         | rs458106           | G             |
| 3_prime_UTR_variant                     | 3830 |     |         | rs801913           | c             |
| 3_prime_UTR_variant, feature_elongation |      |     |         | rs201632485        |               |
| 3_prime_UTR_variant                     | 4504 |     |         | rs149915954        |               |
| 3_prime_UTR_variant                     | 4504 |     |         | rs149915954        |               |
| 3_prime_UTR_variant                     | 4509 |     |         | rs1678595          |               |
| downstream_gene_variant                 | 0    |     |         | rs66597916         | T             |
| downstream_gene_variant                 | 0    |     |         | rs1642739          | C             |
| downstream_gene_variant                 | 0    |     |         | rs115415687        | C             |
| 3_prime_UTR_variant                     | 2705 |     |         | rs2953             | T             |
| 3_prime_UTR_variant, feature_truncation | 2730 |     |         |                    |               |
| 3_prime_UTR_variant, feature_elongation | 2730 |     |         |                    |               |
| 3_prime_UTR_variant                     | 2730 |     |         | rs4135387          |               |
| 3_prime_UTR_variant, feature_elongation |      |     |         | rs3834205, rs16339 |               |
| 3_prime_UTR_variant                     | 8274 |     |         | rs11708257         | G             |
| synonymous_variant                      | 3863 | T   | acG/acA |                    |               |
| 3_prime_UTR_variant                     | 5507 |     |         | rs3199918          | T             |
| synonymous_variant                      | 4449 | P   | ccA/ccG | rs2251219          | T             |
| synonymous_variant                      | 3636 | P   | ccA/ccT | rs17264436         | T             |
| synonymous_variant                      | 2325 | T   | acA/acG | rs3755806          | T             |
| 5_prime_UTR_variant                     | 51   |     |         | rs10933            | C             |
| intron_variant, feature_elongation      | 0    |     |         | rs202179455        |               |
| intron_variant, feature_elongation      | 0    |     |         |                    |               |
| intron_variant                          | 0    |     |         | rs28623022         | T             |
| missense_variant                        | 2966 | R/H | cGc/cAc | rs17801309         | G             |



Grillet et al., Supplementary Table 3

|                                         |      |     |         |             |   |
|-----------------------------------------|------|-----|---------|-------------|---|
| missense_variant                        | 2995 | W/R | Tgg/Cgg | rs35124509  | C |
| 3_prime_UTR_variant                     | 4582 |     |         | rs7650184   | A |
| missense_variant                        | 7667 | Q/R | cAa/cGa | rs1381057   | C |
| missense_variant                        | 3731 | H/R | cAt/cGt | rs3218651   | T |
| missense_variant                        | 3074 | T/R | aCa/aGa | rs3218649   | C |
| synonymous_variant                      | 1566 | G   | ggC/ggT | rs702018    | A |
| missense_variant                        | 326  | R/I | aGa/aTa | rs702017    | A |
| synonymous_variant                      | 7997 | Q   | caG/caA | rs1802904   | T |
| intron_variant                          | 0    |     |         | rs111700291 | A |
| intron_variant                          | 0    |     |         | rs113913342 | A |
| intron_variant                          | 0    |     |         | rs77166419  | C |
| intron_variant                          | 0    |     |         | rs9828178   | G |
| intron_variant                          | 0    |     |         | rs74385971  | T |
| synonymous_variant                      | 5990 | Y   | taC/taT | rs112018640 | g |
| synonymous_variant                      | 5582 | Y   | taT/taC | rs2227932   | A |
| synonymous_variant                      | 3242 | L   | ttG/ttA | rs28910272  | C |
| missense_variant                        | 2997 | V/M | Gtg/Atg | rs28910271  | T |
| synonymous_variant                      | 2072 | E   | gaG/gaA | rs28910270  | T |
| synonymous_variant                      | 1898 | G   | ggT/ggA | rs2227930   | T |
| synonymous_variant                      | 1448 | K   | aaA/aaG | rs28897765  | T |
| missense_variant                        | 1068 | V/I | Gtc/Atc | rs28897764  | C |
| missense_variant                        | 754  | M/T | aTg/aCg | rs2227928   | G |
| 3_prime_UTR_variant                     | 5325 |     |         | rs1048604   | C |
| intron_variant                          | 0    |     |         | rs1420476   | A |
| intron_variant                          | 0    |     |         | rs7633965   | C |
| intron_variant                          | 0    |     |         | rs10936575  | C |
| missense_variant                        | 1192 | N/K | aaT/aaA | rs121913284 |   |
| 5_prime_UTR_variant                     | 162  |     |         | rs11726794  | a |
| 5_prime_UTR_variant                     | 1313 |     |         | rs57037487  | a |
| 5_prime_UTR_variant                     | 1959 |     |         | rs11729037  | a |
| 5_prime_UTR_variant, feature_elongation |      |     |         |             |   |
| 5_prime_UTR_variant, feature_truncation |      |     |         | rs199585178 |   |
| 5_prime_UTR_variant                     | 2441 |     |         | rs6599308   | G |
| 5_prime_UTR_variant                     | 2776 |     |         | rs6599309   | G |
| missense_variant                        | 3244 | H/R | cAc/cGc | rs9328733   |   |
| missense_variant                        | 3327 | R/W | Cgg/Tgg | rs9760377   |   |
| missense_variant                        | 3354 | H/D | Cat/Gat | rs78906219  |   |

Grillet et al., Supplementary Table 3

|                                         |      |     |         |             |     |
|-----------------------------------------|------|-----|---------|-------------|-----|
| missense_variant                        | 3358 | A/V | gCg/gTg | rs113316888 |     |
| synonymous_variant                      | 3389 | C   | tgC/tgT | rs9760383   |     |
| synonymous_variant                      | 3416 | P   | ccC/ccG | rs141481663 |     |
| missense_variant                        | 3418 | M/T | aTg/aCg | rs138170890 |     |
| missense_variant                        | 3420 | R/W | Cgg/Tgg | rs112233131 |     |
| missense_variant                        | 3447 | D/H | Gac/Cac | rs146249377 |     |
| synonymous_variant                      | 3449 | D   | gaC/gaT | rs139161344 |     |
| missense_variant                        | 3528 | I/L | Atc/Ctc | rs76058011  |     |
| missense_variant                        | 3613 | V/A | gTt/gCt | rs76774451  |     |
| synonymous_variant                      | 3614 | V   | gtT/gtC | rs75736606  |     |
| missense_variant                        | 3637 | A/V | gCg/gTg | rs76432995  |     |
| synonymous_variant                      | 3668 | C   | tgC/tgT | rs78871723  |     |
| missense_variant                        | 3698 | M/I | atG/atA | rs76723438  |     |
| missense_variant                        | 3817 | M/T | aTg/aCg | rs71614972  |     |
| synonymous_variant                      | 2215 | T   | acG/acA | rs7688609   | a   |
| 3_prime_UTR_variant                     | 3481 |     |         | rs3135904   | c   |
| synonymous_variant                      | 250  | Q   | caG/caA | rs9993357   |     |
| synonymous_variant                      | 289  | P   | ccT/ccG |             |     |
| 5_prime_UTR_variant, feature_truncation |      |     |         | rs113739379 | CAG |
| synonymous_variant                      | 943  | N   | aaT/aaC | rs2229307   | C   |
| missense_variant                        | 992  | L/F | Ctt/Ttt | rs139913632 | C   |
| synonymous_variant                      | 1270 | G   | ggT/ggG | rs4358459   | G   |
| missense_variant                        | 1763 | S/P | Tcc/Ccc | rs35597368  | C   |
| synonymous_variant                      | 2032 | P   | ccA/ccG | rs1873778   | G   |
| synonymous_variant                      | 2140 | A   | gcG/gcA | rs10028020  | G   |
| intron_variant                          | 0    |     |         | rs2291591   | C   |
| synonymous_variant                      | 2803 | V   | gtC/gtT | rs2228230   | C   |
| synonymous_variant                      | 3553 | D   | gaT/gaC | rs7685117   | C   |
| 3_prime_UTR_variant                     | 3679 |     |         | rs7680422   |     |
| 3_prime_UTR_variant                     | 3975 |     |         | rs3690      | A   |
| 3_prime_UTR_variant                     | 5112 |     |         | rs1565664   | A   |
| 3_prime_UTR_variant                     | 5988 |     |         | rs10034498  | T   |
| missense_variant                        | 1575 | P/L | cCt/cTt | rs17253672  | C   |
| intron_variant                          | 0    |     |         | rs114672787 | T   |
| intron_variant                          | 0    |     |         | rs6847204   | A   |
| intron_variant                          | 0    |     |         | rs56185013  | G   |
| intron_variant                          | 0    |     |         |             |     |

Grillet et al., Supplementary Table 3

|                                         |      |      |            |             |   |
|-----------------------------------------|------|------|------------|-------------|---|
| intron_variant                          | 0    |      |            | rs72665940  |   |
| intron_variant                          | 0    |      |            | rs78302349  |   |
| intron_variant                          | 0    |      |            | rs7670522   | A |
| missense_variant                        | 5649 | L/W  | tTg/tGg    | rs34402524  |   |
| missense_variant                        | 5771 | I/V  | Ata/Gta    | rs2454206   | A |
| 3_prime_UTR_variant                     | 8325 |      |            | rs2647257   | A |
| stop_gained                             | 2242 | E/*  | Gaa/Taa    |             |   |
| intron_variant                          | 0    |      |            | rs75360200  | C |
| intron_variant                          | 0    |      |            | rs12644477  | T |
| 5_prime_UTR_variant                     | 84   |      |            | rs1351903   | G |
| 3_prime_UTR_variant                     | 9816 |      |            | rs1046224   | G |
| 3_prime_UTR_variant                     | 9296 |      |            | rs3822425   | T |
| 3_prime_UTR_variant                     | 7460 |      |            | rs34130318  | G |
| 3_prime_UTR_variant                     | 5096 |      |            | rs13156520  |   |
| 3_prime_UTR_variant                     | 3988 |      |            | rs1005017   | T |
| intron_variant                          | 0    |      |            | rs35472725  | C |
| 5_prime_UTR_variant                     | 38   |      |            | rs72758040  | G |
| 5_prime_UTR_variant                     | 93   |      |            | rs13356762  | G |
| 5_prime_UTR_variant                     | 188  |      |            | rs11739344  | C |
| synonymous_variant                      | 852  | A    | gcG/gcC    | rs28710284  | g |
| synonymous_variant                      | 1785 | T    | acG/acA    | rs832575    | A |
| missense_variant                        | 2917 | D/N  | Gat/Aat    | rs702689    | G |
| missense_variant                        | 3217 | V/I  | Gtc/Atc    | rs832582    | A |
| inframe_deletion                        |      | ST/S | tCAAcA/tca | rs5868032   |   |
| synonymous_variant                      | 3691 | R    | Aga/Cga    | rs832583    | C |
| 3_prime_UTR_variant                     | 5642 |      |            | rs143101608 | C |
| 3_prime_UTR_variant                     | 6064 |      |            | rs190413    | A |
| 3_prime_UTR_variant                     | 6519 |      |            | rs702688    | A |
| 3_prime_UTR_variant, feature_truncation |      |      |            | rs71904716  |   |
| 3_prime_UTR_variant                     | 6733 |      |            | rs832546    |   |
| 3_prime_UTR_variant, feature_truncation | 7337 |      |            | rs199989267 |   |
| 3_prime_UTR_variant, feature_elongation | 7337 |      |            |             |   |
| intron_variant                          | 0    |      |            | rs2888323   | G |
| missense_variant                        | 1558 | M/I  | atG/atA    | rs3730089   | G |
| 3_prime_UTR_variant                     | 2758 |      |            | rs41268435  | C |
| 3_prime_UTR_variant                     | 3629 |      |            | rs56235611  | C |
| 3_prime_UTR_variant, feature_truncation |      |      |            | rs142718023 |   |

Grillet et al., Supplementary Table 3

|                                         |       |     |         |             |   |
|-----------------------------------------|-------|-----|---------|-------------|---|
| 3_prime_UTR_variant                     | 5187  |     |         | rs12755     | C |
| 3_prime_UTR_variant                     | 5414  |     |         | rs3756668   | A |
| 3_prime_UTR_variant                     | 5532  |     |         | rs80193740  | C |
| 3_prime_UTR_variant                     | 5691  |     |         | rs75107789  | C |
| 3_prime_UTR_variant, feature_truncation |       |     |         |             |   |
| 3_prime_UTR_variant                     | 6259  |     |         | rs66666989  | C |
| synonymous_variant                      | 1543  | Y   | taT/taC | rs2229992   | T |
| synonymous_variant                      | 1720  | A   | gcG/gcA | rs351771    | A |
| stop_gained                             | 1745  | R/* | Cga/Tga | rs137854573 |   |
| stop_gained                             | 4433  | R/* | Cga/Tga | rs121913332 |   |
| synonymous_variant                      | 4564  | T   | acG/acA | rs41115     | G |
| synonymous_variant                      | 5119  | G   | ggG/ggA | rs42427     | g |
| synonymous_variant                      | 5353  | S   | tcT/tcG | rs866006    | t |
| missense_variant                        | 5550  | V/D | gTc/gAc | rs459552    | A |
| synonymous_variant                      | 5965  | P   | ccG/ccA | rs465899    | A |
| 3_prime_UTR_variant                     | 9715  |     |         | rs41116     | T |
| 3_prime_UTR_variant                     | 10173 |     |         | rs448475    | C |
| 3_prime_UTR_variant                     | 10370 |     |         | rs397768    | G |
| synonymous_variant                      | 1620  | C   | tgC/tgT | rs1363405   | T |
| synonymous_variant                      | 1887  | E   | gaG/gaA | rs3733874   | G |
| missense_variant                        | 1978  | V/L | Gtg/Ttg | rs3733875   | G |
| missense_variant                        | 2314  | S/P | Tct/Cct | rs28932178  | T |
| synonymous_variant                      | 6967  | L   | Ttg/Ctg | rs28580074  | C |
| 3_prime_UTR_variant                     | 11771 |     |         | rs4976682   | C |
| 3_prime_UTR_variant                     | 12404 |     |         | rs3088050   | G |
| missense_variant                        | 1555  | H/Q | caT/caG | rs59310777  | A |
| missense_variant                        | 1552  | Q/H | caG/caT |             |   |
| missense_variant                        | 1549  | H/Q | caT/caG | rs11969612  |   |
| missense_variant                        | 1543  | Q/H | caG/caT | rs201030692 |   |
| missense_variant                        | 1537  | Q/H | caG/caT | rs200788953 | C |
| synonymous_variant                      | 628   | P   | ccC/ccG | rs8384      | G |
| synonymous_variant                      | 151   | S   | tcT/tcC | rs10425     | G |
| 3_prime_UTR_variant                     | 487   |     |         | rs1059490   |   |
| 3_prime_UTR_variant                     | 1339  |     |         | rs74843405  | C |
| synonymous_variant                      | 495   | Q   | caA/caG | rs55736770  |   |
| synonymous_variant                      | 498   | Q   | caG/caA |             |   |
| synonymous_variant                      | 501   | Q   | caA/caG | rs62430309  |   |

Grillet et al., Supplementary Table 3

|                                                |      |       |               |                       |   |
|------------------------------------------------|------|-------|---------------|-----------------------|---|
| synonymous_variant                             | 504  | Q     | caG/caA       | rs56241301            |   |
| synonymous_variant                             | 720  | N     | aaC/aaT       | rs2072454             | C |
| missense_variant                               | 1808 | R/K   | aGg/aAg       | rs2227983             | G |
| intron_variant                                 | 0    |       |               | rs10228436            | G |
| intron_variant                                 | 0    |       |               | rs10277413            | T |
| synonymous_variant                             | 2133 | T     | acT/acA       | rs17337023, rs2227984 | T |
| non_coding_exon_variant, nc_transcript_variant | 1201 |       |               | rs1050171             | G |
| synonymous_variant                             | 2955 | T     | acT/acC       | rs1140475             | C |
| downstream_gene_variant                        | 0    |       |               | rs940811              |   |
| downstream_gene_variant                        | 0    |       |               | rs940810              | C |
| downstream_gene_variant                        | 0    |       |               | rs3800826             | C |
| missense_variant                               | 1075 | E/K   | Gaa/Aaa       | rs5745687             | C |
| intron_variant                                 | 0    |       |               | rs5745678             | G |
| intron_variant                                 | 0    |       |               | rs5745676             | G |
| intron_variant                                 | 0    |       |               | rs5745653             | T |
| intron_variant, feature_elongation             | 0    |       |               |                       |   |
| intron_variant                                 | 0    |       |               | rs111441846           |   |
| intron_variant, feature_truncation             | 0    |       |               |                       |   |
| intron_variant                                 | 0    |       |               |                       |   |
| intron_variant                                 | 0    |       |               | rs5745646             | T |
| synonymous_variant                             | 1282 | P     | ccA/ccG       | rs849389              | G |
| synonymous_variant                             | 1291 | D     | gaT/gaC       | rs849390              | C |
| synonymous_variant                             | 2335 | S     | agC/agT       | rs1129293             | C |
| 3_prime_UTR_variant                            | 3874 |       |               | rs3173908             | C |
| 3_prime_UTR_variant                            | 4444 |       |               | rs12667819            | G |
| 3_prime_UTR_variant                            | 5063 |       |               | rs199687602           |   |
| 3_prime_UTR_variant, feature_truncation        | 5064 |       |               |                       |   |
| 3_prime_UTR_variant, feature_elongation        | 5064 |       |               |                       |   |
| 3_prime_UTR_variant                            | 5256 |       |               | rs10216210            | G |
| downstream_gene_variant                        | 0    |       |               | rs10215499            | A |
| missense_variant                               | 1860 | V/E   | gTg/gAg       | rs113488022           |   |
| 5_prime_UTR_variant                            | 85   |       |               | rs8177101             | G |
| 5_prime_UTR_variant                            | 438  |       |               | rs8177125             | G |
| inframe_insertion                              |      | P/PS  | ccc/cCCTcc    | rs143667567           |   |
| inframe_insertion                              |      | P/PSS | ccc/cCCTCCTcc | rs143667567           |   |
| missense_variant                               | 1757 | S/A   | Tct/Gct       | rs8177146             | G |
| synonymous_variant                             | 2557 | P     | ccG/ccA       | rs8177153             | G |

Grillet et al., Supplementary Table 3

|                                         |       |     |         |                      |     |
|-----------------------------------------|-------|-----|---------|----------------------|-----|
| synonymous_variant                      | 2674  | T   | acG/acA | rs2229873            | G   |
| 3_prime_UTR_variant, feature_truncation | 3967  |     |         | rs4987689, rs8177165 | TC  |
| 3_prime_UTR_variant, feature_truncation | 2470  |     |         | rs3217095            |     |
| 3_prime_UTR_variant                     | 16437 |     |         | rs62481481           |     |
| synonymous_variant                      | 5287  | R   | Aga/Cga | rs78697077           |     |
| missense_variant                        | 3182  | C/F | tGt/tTt | rs28522267           |     |
| missense_variant                        | 3178  | Y/H | Tac/Cac | rs183684706          |     |
| synonymous_variant                      | 3177  | P   | ccA/ccG | rs28439884           |     |
| synonymous_variant                      | 2982  | L   | ttA/ttG | rs112326730          |     |
| missense_variant                        | 2731  | G/S | Ggt/Agt | rs137949498          |     |
| synonymous_variant                      | 2598  | S   | tcG/tcA | rs57648310           |     |
| synonymous_variant                      | 2571  | S   | tcC/tcA | rs2537264            |     |
| synonymous_variant                      | 1350  | P   | ccA/ccT | rs62478356           |     |
| missense_variant                        | 1165  | T/S | Acc/Tcc | rs10454320           |     |
| missense_variant                        | 1090  | L/F | Ctt/Ttt | rs56850341           |     |
| 3_prime_UTR_variant                     | 2947  |     |         | rs1877670            | C   |
| 3_prime_UTR_variant                     | 2456  |     |         | rs11136094           | A   |
| 3_prime_UTR_variant                     | 1554  |     |         | rs117273864          | T   |
| 3_prime_UTR_variant                     | 3534  |     |         | rs4570               | A   |
| 3_prime_UTR_variant, feature_elongation |       |     |         | rs16918570           | CAT |
| synonymous_variant                      | 1728  | A   | gcT/gcC | rs1050838            | A   |
| synonymous_variant                      | 7135  | R   | cgC/cgT | rs4977191            |     |
| synonymous_variant                      | 6658  | R   | cgC/cgG | rs74184133           |     |
| missense_variant                        | 6656  | R/C | Cgc/Tgc | rs11781942           | G   |
| missense_variant                        | 6254  | L/V | Ctg/Gtg | rs7839934            | g   |
| synonymous_variant                      | 6016  | A   | gcG/gcA | rs12681478           | C   |
| missense_variant                        | 4532  | T/A | Acc/Gcc | rs6558399            | C   |
| synonymous_variant                      | 3274  | P   | ccG/ccA | rs35221054           | c   |
| synonymous_variant                      | 3259  | E   | gaA/gaG | rs12542653           | C   |
| synonymous_variant                      | 2797  | G   | ggC/ggT | rs56118826           | G   |
| missense_variant                        | 2244  | Y/C | tAc/tGc | rs12543389           | T   |
| missense_variant                        | 1643  | K/E | Aag/Gag | rs13255110           | C   |
| synonymous_variant                      | 1183  | L   | ctG/ctA | rs11136330           | C   |
| synonymous_variant                      | 1090  | A   | gcC/gcT | rs34753358           | G   |
| missense_variant                        | 617   | D/N | Gac/Aac | rs13260439           | C   |
| 3_prime_UTR_variant                     | 1003  |     |         | rs11515              | G   |
| 5_prime_UTR_variant                     | 116   |     |         | rs3814960            |     |

Grillet et al., Supplementary Table 3

|                                           |       |     |         |                    |   |
|-------------------------------------------|-------|-----|---------|--------------------|---|
| 3_prime_UTR_variant                       | 4023  |     |         | rs11536889         | G |
| 3_prime_UTR_variant                       | 9007  |     |         | rs6563             | G |
| 3_prime_UTR_variant                       | 7794  |     |         | rs3124591          | T |
| synonymous_variant                        | 6555  | D   | gaC/gaT | rs2229974          | G |
| synonymous_variant                        | 5094  | D   | gaC/gaT | rs10521            | G |
| synonymous_variant                        | 2265  | N   | aaT/aaC | rs2229971          | G |
| synonymous_variant                        | 312   | N   | aaT/aaC | rs4489420          | G |
| synonymous_variant                        | 1178  | A   | gcC/gcT | rs2229359          | C |
| 3_prime_UTR_variant                       | 2504  |     |         | rs1058240          | A |
| 3_prime_UTR_variant                       | 4199  |     |         | rs4948506          | C |
| 5_prime_UTR_variant                       | 522   |     |         | rs12573787         | G |
| 5_prime_UTR_variant, feature_truncation   | 667   |     |         | rs71022512         | C |
| 5_prime_UTR_variant                       | 707   |     |         | rs2943772          |   |
| synonymous_variant                        | 3165  | S   | tcA/tcG | rs2419565          | G |
| 3_prime_UTR_variant                       | 3375  |     |         | rs1047057          | G |
| intron_variant                            | 0     |     |         | rs3135817          | C |
| intron_variant                            | 0     |     |         | rs1649167          | t |
| synonymous_variant                        | 1343  | V   | gtA/gtG | rs1047100          | C |
| 5_prime_UTR_variant                       | 412   |     |         | rs1047111          |   |
| 5_prime_UTR_variant                       | 412   |     |         | rs1047111          |   |
| 5_prime_UTR_variant                       | 128   |     |         | rs55911137         | G |
| synonymous_variant                        | 878   | F   | ttC/ttT | rs3862792          | C |
| splice_region_variant, synonymous_variant | 932   | P   | ccG/ccA | rs9344, rs17295377 | G |
| 3_prime_UTR_variant                       | 1162  |     |         | rs7177             | C |
| 3_prime_UTR_variant                       | 1784  |     |         | rs678653           | C |
| 5_prime_UTR_variant                       | 275   |     |         | rs189037           | G |
| missense_variant                          | 1394  | R/C | Cgt/Tgt | rs138398778        |   |
| missense_variant                          | 6333  | N/S | aAt/aGt | rs659243           | G |
| 3_prime_UTR_variant                       | 10104 |     |         | rs227092           | G |
| 3_prime_UTR_variant                       | 11160 |     |         | rs227091           | C |
| 3_prime_UTR_variant                       | 12949 |     |         | rs4585             | T |
| 5_prime_UTR_variant                       | 394   |     |         | rs34330            | T |
| missense_variant                          | 798   | V/G | gTc/gGc | rs2066827          | T |
| 3_prime_UTR_variant                       | 2025  |     |         | rs7330             | A |
| 3_prime_UTR_variant                       | 4951  |     |         | rs12245            | T |
| 3_prime_UTR_variant, feature_truncation   |       |     |         | rs57698689         |   |
| 3_prime_UTR_variant                       | 4773  |     |         | rs12587            | T |

Grillet et al., Supplementary Table 3

|                                         |       |     |         |            |   |
|-----------------------------------------|-------|-----|---------|------------|---|
| 3_prime_UTR_variant                     | 4658  |     |         | rs8720     | T |
| 3_prime_UTR_variant                     | 4374  |     |         | rs61764372 | A |
| 3_prime_UTR_variant                     | 4273  |     |         | rs1137189  | a |
| 3_prime_UTR_variant                     | 4249  |     |         | rs1137188  | A |
| 3_prime_UTR_variant, feature_truncation | 4136  |     |         | rs34176876 | T |
| 3_prime_UTR_variant                     | 3760  |     |         | rs13096    | C |
| 3_prime_UTR_variant                     | 3463  |     |         | rs4963858  | t |
| 3_prime_UTR_variant                     | 2527  |     |         | rs7973623  | G |
| 3_prime_UTR_variant                     | 2510  |     |         | rs4597149  | C |
| 3_prime_UTR_variant                     | 2459  |     |         | rs7973450  | A |
| 3_prime_UTR_variant                     | 1955  |     |         | rs7960917  | T |
| 3_prime_UTR_variant                     | 1384  |     |         | rs9266     | A |
| 3_prime_UTR_variant                     | 1136  |     |         | rs4285970  | A |
| 3_prime_UTR_variant                     | 1049  |     |         | rs712      | A |
| 3_prime_UTR_variant                     | 824   |     |         | rs1137282  | A |
| intron_variant                          | 0     |     |         | rs6487461  | T |
| synonymous_variant                      | 664   | R   | agG/agA | rs4362222  | T |
| 3_prime_UTR_variant                     | 485   |     |         | rs3759294  | A |
| missense_variant, splice_region_variant | 270   | R/H | cGc/cAc | rs2256408  | A |
| synonymous_variant                      | 578   | L   | Ttg/Ctg | rs10878245 | T |
| missense_variant                        | 1774  | N/K | aaC/aaG | rs7308720  | C |
| missense_variant                        | 4314  | R/H | cGt/cAt | rs7133914  | G |
| synonymous_variant                      | 4390  | K   | aaG/aaA | rs11175964 | G |
| synonymous_variant                      | 4993  | G   | ggC/ggA | rs1427263  | A |
| synonymous_variant                      | 5032  | K   | aaA/aaG | rs11176013 | G |
| synonymous_variant                      | 5578  | G   | ggT/ggC | rs10878371 | C |
| missense_variant                        | 7311  | M/T | aTg/aCg | rs3761863  | C |
| 3_prime_UTR_variant                     | 7801  |     |         | rs66737902 | T |
| 3_prime_UTR_variant                     | 8069  |     |         | rs10878441 | A |
| 3_prime_UTR_variant                     | 8089  |     |         | rs3886747  | T |
| 3_prime_UTR_variant                     | 8441  |     |         | rs1365770  | C |
| 3_prime_UTR_variant                     | 8684  |     |         | rs10784548 | C |
| synonymous_variant                      | 13689 | P   | ccC/ccT | rs11168830 | G |
| synonymous_variant                      | 12510 | P   | ccA/ccG | rs3741622  | T |
| synonymous_variant                      | 10836 | Q   | caG/caA | rs3782357  | T |
| synonymous_variant                      | 7479  | G   | ggG/ggT | rs10747559 | A |
| synonymous_variant                      | 2826  | I   | atC/atT | rs2241726  | A |



Grillet et al., Supplementary Table 3

|                                         |       |     |         |             |   |
|-----------------------------------------|-------|-----|---------|-------------|---|
| 5_prime_UTR_variant, feature_truncation |       |     |         | rs10540557  |   |
| upstream_gene_variant                   | 0     |     |         | rs12824377  | G |
| upstream_gene_variant                   | 0     |     |         | rs7977457   | C |
| upstream_gene_variant                   | 0     |     |         | rs199949422 |   |
| upstream_gene_variant                   | 0     |     |         | rs75934738  |   |
| upstream_gene_variant                   | 0     |     |         |             |   |
| upstream_gene_variant                   | 0     |     |         | rs77759134  |   |
| 5_prime_UTR_variant                     | 42    |     |         | rs12227066  | T |
| 5_prime_UTR_variant                     | 118   |     |         | rs17195772  | C |
| missense_variant                        | 306   | T/A | Act/Gct | rs10735309  | G |
| synonymous_variant                      | 4637  | Q   | caG/caA | rs1852464   | A |
| 3_prime_UTR_variant                     | 7546  |     |         | rs61938464  | T |
| 3_prime_UTR_variant                     | 8140  |     |         | rs146597064 | T |
| 3_prime_UTR_variant                     | 8403  |     |         | rs300450    | G |
| 3_prime_UTR_variant                     | 3935  |     |         | rs8853      | T |
| 3_prime_UTR_variant                     | 3565  |     |         | rs3829382   | G |
| missense_variant                        | 762   | T/M | aCg/aTg | rs1933437   | G |
| synonymous_variant                      | 370   | D   | gaC/gaT | rs7338903   | G |
| 5_prime_UTR_variant                     | 202   |     |         | rs1799943   | G |
| synonymous_variant                      | 3623  | K   | aaA/aaG | rs1801406   |   |
| synonymous_variant                      | 4034  | V   | gtT/gtC | rs543304    | T |
| synonymous_variant                      | 4790  | L   | ctA/ctG | rs206075    | G |
| synonymous_variant                      | 6740  | V   | gtG/gtC | rs206076    | C |
| synonymous_variant                      | 7469  | S   | tcA/tcG | rs1799955   | A |
| missense_variant                        | 7624  | V/A | gTa/gCa | rs169547    | C |
| 3_prime_UTR_variant                     | 10589 |     |         | rs15869     | A |
| 3_prime_UTR_variant                     | 11016 |     |         | rs11571836  | A |
| 3_prime_UTR_variant, feature_truncation |       |     |         |             |   |
| 3_prime_UTR_variant                     |       |     |         |             |   |
| 3_prime_UTR_variant, feature_truncation |       |     |         |             |   |
| 3_prime_UTR_variant                     |       |     |         |             |   |
| missense_variant                        | 395   | A/T | Gcc/Acc | rs7144658   | C |
| 5_prime_UTR_variant                     | 111   |     |         | rs79519281  | g |
| synonymous_variant                      | 1065  | E   | gaG/gaA | rs1130233   | C |
| intron_variant                          | 0     |     |         | rs1130214   | C |
| 3_prime_UTR_variant                     | 2157  |     |         | rs200378797 |   |
| intron_variant                          | 0     |     |         | rs2909430   | C |

Grillet et al., Supplementary Table 3

|                                        |       |     |         |                        |   |
|----------------------------------------|-------|-----|---------|------------------------|---|
| missense_variant                       | 417   | P/R | cCc/cGc | rs1042522              | G |
| intron_variant                         | 0     |     |         | rs1642785              | G |
| intron_variant                         | 0     |     |         | rs2078050              | T |
| missense_variant                       | 840   | E/K | Gaa/Aaa | rs76780359             |   |
| stop_gained                            | 837   | R/* | Cga/Tga | rs78230791             |   |
| synonymous_variant                     | 818   | Q   | caG/caA | rs76375524             |   |
| missense_variant                       | 803   | K/N | aaG/aaC | rs200020868            |   |
| synonymous_variant                     | 797   | L   | ctC/ctT | rs199892481            |   |
| missense_variant                       | 784   | S/L | tCa/tTa | rs150910818            |   |
| synonymous_variant                     | 1085  | L   | ctG/ctA | rs1801052              | A |
| 3_prime_UTR_variant                    | 11732 |     |         | rs1048317              | C |
| downstream_gene_variant                | 0     |     |         | rs2525574              | C |
| 3_prime_UTR_variant                    | 5458  |     |         | rs1054488              | G |
| 3_prime_UTR_variant                    | 5851  |     |         |                        |   |
| 3_prime_UTR_variant                    | 5877  |     |         | rs57644567             |   |
| 3_prime_UTR_variant                    | 5881  |     |         |                        |   |
| 3_prime_UTR_variant                    | 5883  |     |         | rs8075042              | c |
| synonymous_variant                     | 1244  | L   | ctG/ctC | rs1135655              | C |
| intron_variant, nc_transcript_variant  | 0     |     |         | rs2632516              | C |
| 3_prime_UTR_variant                    | 3833  |     |         | rs7591                 | A |
| synonymous_variant                     | 1675  | P   | ccC/ccT | rs1133683              | G |
| synonymous_variant                     | 1654  | P   | ccA/ccG | rs9915936              | C |
| missense_variant                       | 437   | P/S | Cct/Tct | rs2240308              | G |
| intron_variant                         | 0     |     |         | rs11079572             | G |
| intron_variant                         | 0     |     |         | rs12452513             | G |
| intron_variant                         | 0     |     |         | rs12452505             | c |
| intron_variant                         | 0     |     |         | rs74530461             |   |
| synonymous_variant                     | 879   | H   | caC/caT | rs2229989              | C |
| frameshift_variant, feature_elongation |       |     |         |                        |   |
| 3_prime_UTR_variant                    | 1925  |     |         | rs1042667              | A |
| 3_prime_UTR_variant                    | 2713  |     |         | rs1042673              | G |
| 3_prime_UTR_variant                    | 3482  |     |         | rs1042678              | G |
| upstream_gene_variant                  | 0     |     |         |                        |   |
| upstream_gene_variant                  | 0     |     |         |                        |   |
| intron_variant                         | 0     |     |         | rs663651               | A |
| intron_variant, feature_elongation     | 0     |     |         | rs201292684, rs3085861 |   |
| intron_variant                         | 0     |     |         | rs12607977             | A |

Grillet et al., Supplementary Table 3

|                                                               |       |     |         |                          |       |
|---------------------------------------------------------------|-------|-----|---------|--------------------------|-------|
| missense_variant                                              | 3684  | P/T | Cct/Act | rs1064204                | C     |
| synonymous_variant                                            | 4121  | S   | tcA/tcG | rs8096662                | G     |
| 3_prime_UTR_variant                                           | 8920  |     |         | rs181283064              | C     |
| 3_prime_UTR_variant, feature_elongation                       |       |     |         | rs111850625, rs146995595 | CTTAT |
| 3_prime_UTR_variant                                           | 4558  |     |         | rs112132589              | G     |
| 3_prime_UTR_variant                                           | 2410  |     |         | rs1787187                | G     |
| missense_variant                                              | 1619  | R/C | Cgc/Tgc | rs80338963               |       |
| stop_gained                                                   | 1871  | R/* | Cga/Tga | rs377767360              |       |
| 3_prime_UTR_variant                                           | 4319  |     |         | rs149424787              | A     |
| 3_prime_UTR_variant                                           | 7280  |     |         | rs145596898              | G     |
| 3_prime_UTR_variant                                           | 7742  |     |         |                          |       |
| synonymous_variant                                            | 2348  | A   | gcT/gcC | rs3745784                | G     |
| synonymous_variant                                            | 1001  | V   | gtC/gtT | rs12461253               | G     |
| upstream_gene_variant                                         | 0     |     |         | rs71173962               | A     |
| frameshift_variant, splice_region_variant, feature_elongation |       |     |         | rs75450951, rs11373774   | AG    |
| synonymous_variant                                            | 6768  | P   | ccA/ccC |                          |       |
| synonymous_variant                                            | 6774  | P   | ccT/ccC |                          |       |
| missense_variant                                              | 7091  | D/G | gAt/gGt | rs231591                 | G     |
| missense_variant                                              | 3663  | G/R | Ggg/Agg | rs268674                 | T     |
| missense_variant                                              | 3032  | I/M | atA/atG | rs268673                 | C     |
| synonymous_variant                                            | 2924  | P   | ccT/ccC | rs268672                 | G     |
| missense_variant                                              | 2914  | V/A | gTg/gCg | rs268671                 | G     |
| missense_variant                                              | 981   | D/N | Gac/Aac | rs1799793                | C     |
| synonymous_variant                                            | 515   | R   | cgA/cgC | rs238406                 | G     |
| synonymous_variant                                            | 1391  | Q   | caA/caG | rs1212275                | t     |
| missense_variant                                              | 2876  | L/P | cTg/cCg | rs6058694                | C     |
| synonymous_variant                                            | 4191  | S   | agT/agC | rs4911231                | T     |
| 3_prime_UTR_variant                                           | 5080  |     |         | rs2295764                | A     |
| 3_prime_UTR_variant                                           | 5148  |     |         | rs2295763                | C     |
| 3_prime_UTR_variant                                           | 5452  |     |         | rs2295762                | G     |
| 3_prime_UTR_variant                                           | 5606  |     |         | rs41289852               | G     |
| intron_variant                                                | 0     |     |         | rs2010170                | G     |
| intron_variant                                                | 0     |     |         | rs2010156                | C     |
| synonymous_variant                                            | 1739  | F   | ttT/ttC | rs739870                 | C     |
| 3_prime_UTR_variant                                           | 4670  |     |         | rs2248264                | T     |
| 3_prime_UTR_variant                                           | 6290  |     |         | rs2741373                | T     |
| 3_prime_UTR_variant                                           | 11194 |     |         | rs2741376                | C     |

Grillet et al., Supplementary Table 3

|                                         |       |   |         |             |      |
|-----------------------------------------|-------|---|---------|-------------|------|
| 3_prime_UTR_variant                     | 12070 |   |         |             |      |
| 3_prime_UTR_variant                     | 1660  |   |         | rs13051066  | G    |
| intron_variant                          | 0     |   |         | rs2018329   | C    |
| 5_prime_UTR_variant                     | 20    |   |         | rs17115876  | G    |
| synonymous_variant                      | 3578  | T | acT/acA | rs20552     | A    |
| synonymous_variant                      | 6086  | S | tcC/tcG |             |      |
| 3_prime_UTR_variant, feature_truncation |       |   |         | rs35508493  | TGTA |
| 3_prime_UTR_variant                     | 8562  |   |         | rs146984033 |      |
| 3_prime_UTR_variant                     | 8564  |   |         | rs149250603 |      |
| 3_prime_UTR_variant                     | 8566  |   |         | rs140429533 |      |
| 3_prime_UTR_variant                     | 8568  |   |         | rs142198417 |      |
| 3_prime_UTR_variant                     | 8570  |   |         |             |      |
| 3_prime_UTR_variant                     | 8572  |   |         |             |      |
| 3_prime_UTR_variant                     | 9982  |   |         | rs4827256   | A    |
| 3_prime_UTR_variant                     | 6529  |   |         | rs1886889   | t    |
| 3_prime_UTR_variant, feature_elongation |       |   |         | rs75167298  | t    |
| 3_prime_UTR_variant, feature_elongation |       |   |         | rs150558161 | a    |
| splice_region_variant, intron_variant   | 0     |   |         |             |      |
| intron_variant                          | 0     |   |         | rs5918762   | T    |
| intron_variant                          | 0     |   |         | rs12835243  |      |
| 3_prime_UTR_variant                     | 5935  |   |         | rs5919413   | C    |
| 3_prime_UTR_variant                     | 7046  |   |         | rs1931537   | C    |
| 3_prime_UTR_variant                     | 9917  |   |         | rs7440      | C    |
| 3_prime_UTR_variant, feature_truncation |       |   |         | rs140258587 | TAAG |
| 3_prime_UTR_variant                     | 10300 |   |         | rs2362520   | C    |
| 5_prime_UTR_variant                     | 20    |   |         |             |      |
| 3_prime_UTR_variant                     | 3182  |   |         | rs6638230   | A    |

Grillet et al., Supplementary Table 3

| Allele Freq | Allele Freq Global | Global | Allele Fr | Allele Fr | Allele Fr | Allele Freq Eur | Allele | EVS Coverage | EVS Samp | Conserved Sequence | COSMIC ID   |
|-------------|--------------------|--------|-----------|-----------|-----------|-----------------|--------|--------------|----------|--------------------|-------------|
| 23          | 22.66              | T      | 16        | 6         | 46        | 23              | 30.2   | 72           | 6503     | yes                |             |
| 23          | 23.08              | A      | 16        | 8         | 45        | 23              | 30.6   | 95           | 6503     | yes                |             |
| 61          | 39.29              | C      | 70        | 82        | 8         | 74              | 54.6   | 115          | 6503     | yes                |             |
| 70          | 29.76              | G      | 80        | 91        | 33        | 73              | 61.8   | 95           | 6503     | yes                |             |
| 66          | 33.88              | A      | 75        | 88        | 23        | 73              | 58.5   | 98           | 6503     | yes                |             |
| 59          | 41.25              | C      | 68        | 79        | 11        | 70              | 0      | 0            | 0        |                    |             |
| 0           | 0                  |        | 0         | 0         | 0         | 0               | 0      | 0            | 0        |                    |             |
| 14          | 14.15              | A      | 17        | 3         | 10        | 24              | 0      | 0            | 0        |                    |             |
| 28          | 27.52              | G      | 30        | 40        | 9         | 29              | 0      | 0            | 0        | yes                |             |
| 33          | 33.42              | G      | 20        | 37        | 54        | 23              | 29.6   | 83           | 6503     | yes                | COSM146735  |
| 68          | 31.55              | T      | 55        | 82        | 83        | 55              | 60.6   | 31           | 6502     |                    |             |
| 62          | 38.23              | G      | 69        | 44        | 73        | 65              | 0      | 0            | 0        |                    |             |
| 13          | 13.32              | T      | 23        | 4         | 3         | 22              | 0      | 0            | 0        |                    |             |
| 20          | 19.78              | A      | 24        | 5         | 31        | 21              | 0      | 0            | 0        | yes                |             |
| 8           | 8.42               | A      | 6         | 8         | 6         | 11              | 7.66   | 8            | 6113     | yes                |             |
| 0           | 0                  |        | 0         | 0         | 0         | 0               | 0      | 0            | 0        |                    |             |
| 39          | 38.64              | A      | 44        | 47        | 30        | 35              | 31.4   | 156          | 6501     | yes                |             |
| 40          | 40.48              | T      | 45        | 48        | 37        | 34              | 0      | 0            | 0        |                    |             |
| 0           | 0                  |        | 0         | 0         | 0         | 0               | 0      | 0            | 0        |                    |             |
| 71          | 28.98              | T      | 64        | 60        | 88        | 72              | 73.6   | 110          | 6503     | yes                |             |
| 71          | 29.26              | A      | 64        | 59        | 87        | 73              | 73.5   | 153          | 6502     | yes                |             |
| 71          | 28.94              | T      | 64        | 59        | 88        | 73              | 73.9   | 110          | 6503     | yes                | COSM1129389 |
| 99          | 1.01               | C      | 99        | 100       | 96        | 100             | 0      | 0            | 0        |                    |             |
| 30          | 29.76              | T      | 29        | 38        | 13        | 35              | 0      | 0            | 0        | yes                |             |
| 69          | 30.72              | A      | 66        | 74        | 78        | 62              | 0      | 0            | 0        |                    |             |
| 74          | 26.1               | G      | 69        | 74        | 95        | 63              | 0      | 0            | 0        | yes                |             |
| 44          | 44.05              | C      | 37        | 46        | 60        | 36              | 0      | 0            | 0        |                    |             |
| 41          | 40.93              | C      | 36        | 46        | 46        | 36              | 0      | 0            | 0        |                    |             |
| 65          | 34.66              | G      | 64        | 74        | 62        | 61              | 0      | 0            | 0        |                    |             |
| 26          | 25.73              | A      | 24        | 38        | 13        | 26              | 0      | 0            | 0        | yes                |             |
| 27          | 27.2               | T      | 25        | 38        | 13        | 29              | 0      | 0            | 0        |                    |             |
| 27          | 27.34              | C      | 26        | 38        | 12        | 29              | 0      | 0            | 0        |                    |             |
| 61          | 38.51              |        | 65        | 74        | 41        | 63              | 0      | 0            | 0        |                    |             |
| 0           | 0                  |        | 0         | 0         | 0         | 0               | 0      | 0            | 0        |                    |             |
| 60          | 40.25              | G      | 63        | 74        | 38        | 61              | 0      | 0            | 0        |                    |             |

Grillet et al., Supplementary Table 3

|    |       |   |    |     |    |     |      |     |      |     |
|----|-------|---|----|-----|----|-----|------|-----|------|-----|
| 59 | 41.3  |   | 62 | 72  | 38 | 61  | 0    | 0   | 0    |     |
| 0  | 0     |   | 0  | 0   | 0  | 0   | 0    | 0   | 0    |     |
| 0  | 0     |   | 0  | 0   | 0  | 0   | 0    | 0   | 0    |     |
| 60 | 39.7  | A | 63 | 74  | 40 | 62  | 0    | 0   | 0    |     |
| 60 | 39.65 | A | 63 | 75  | 39 | 62  | 0    | 0   | 0    |     |
| 95 | 4.72  | C | 95 | 92  | 99 | 95  | 0    | 0   | 0    |     |
| 23 | 22.53 | T | 21 | 4   | 39 | 27  | 0    | 0   | 0    | yes |
| 58 | 41.71 | G | 57 | 77  | 18 | 70  | 0    | 0   | 0    |     |
| 59 | 40.8  | G | 58 | 77  | 22 | 70  | 0    | 0   | 0    |     |
| 61 | 38.74 | G | 58 | 77  | 31 | 70  | 0    | 0   | 0    |     |
| 59 | 40.61 | C | 59 | 77  | 22 | 71  | 0    | 0   | 0    |     |
| 88 | 12.45 | T | 81 | 87  | 92 | 88  | 0    | 0   | 0    |     |
| 98 | 1.6   | A | 96 | 100 | 99 | 98  | 0    | 0   | 0    |     |
| 89 | 11.36 | G | 81 | 87  | 97 | 88  | 0    | 0   | 0    |     |
| 0  | 0     |   | 0  | 0   | 0  | 0   | 0    | 0   | 0    |     |
| 0  | 0     |   | 0  | 0   | 0  | 0   | 0    | 0   | 0    |     |
| 0  | 0     |   | 0  | 0   | 0  | 0   | 0    | 0   | 0    |     |
| 0  | 0     |   | 0  | 0   | 0  | 0   | 0    | 0   | 0    |     |
| 12 | 12.41 | C | 17 | 8   | 10 | 16  | 0    | 0   | 0    |     |
| 88 | 12.18 | A | 81 | 87  | 93 | 88  | 0    | 0   | 0    |     |
| 12 | 12.23 | T | 16 | 8   | 9  | 16  | 0    | 0   | 0    |     |
| 36 | 36.45 | G | 38 | 27  | 33 | 45  | 0    | 0   | 0    | yes |
| 0  | 0     |   | 0  | 0   | 0  | 0   | 0    | 0   | 0    |     |
| 0  | 0     |   | 0  | 0   | 0  | 0   | 0    | 0   | 0    |     |
| 0  | 0     |   | 0  | 0   | 0  | 0   | 0    | 0   | 0    |     |
| 0  | 0     |   | 0  | 0   | 0  | 0   | 0    | 0   | 0    | yes |
| 96 | 4.26  | A | 98 | 100 | 83 | 100 | 0    | 0   | 0    | yes |
| 0  | 0     |   | 0  | 0   | 0  | 0   | 0    | 105 | 6503 | yes |
| 10 | 10.35 | C | 14 | 0   | 2  | 22  | 0    | 0   | 0    |     |
| 39 | 39.33 | C | 48 | 49  | 16 | 43  | 32.9 | 76  | 6503 | yes |
| 39 | 39.01 | A | 47 | 49  | 16 | 42  | 32.5 | 116 | 6503 | yes |
| 39 | 39.24 | C | 48 | 49  | 16 | 43  | 33   | 137 | 6503 | yes |
| 38 | 37.55 | T | 33 | 49  | 22 | 41  | 0    | 0   | 0    | yes |
| 16 | 15.89 | A | 20 | 9   | 3  | 27  | 0    | 0   | 0    |     |
| 0  | 0     |   | 0  | 0   | 0  | 0   | 0    | 0   | 0    |     |
| 22 | 22.34 | A | 23 | 9   | 29 | 28  | 0    | 0   | 0    |     |
| 7  | 6.5   | A | 7  | 8   | 1  | 8   | 6.78 | 172 | 6503 | yes |

Grillet et al., Supplementary Table 3

|     |       |   |     |      |      |     |      |     |      |     |            |
|-----|-------|---|-----|------|------|-----|------|-----|------|-----|------------|
| 40  | 40.34 | C | 41  | 20   | 65   | 39  | 46.8 | 143 | 6503 | yes |            |
| 41  | 40.89 | A | 41  | 20   | 66   | 41  | 0    | 0   | 0    |     |            |
| 72  | 28.48 | T | 69  | 89   | 61   | 66  | 67   | 177 | 6503 |     |            |
| 28  | 28.39 | C | 25  | 58   | 14   | 17  | 13.3 | 206 | 6503 |     |            |
| 67  | 33.42 | G | 62  | 89   | 52   | 61  | 60.3 | 53  | 6500 |     |            |
| 100 | 0.09  | G | 100 | 100  | 100  | 100 | 99.9 | 162 | 6503 | yes |            |
| 99  | 0.92  | C | 100 | 100  | 96   | 100 | 98.9 | 93  | 6503 |     |            |
| 90  | 9.71  | C | 83  | 93   | 99   | 86  | 89.8 | 115 | 6503 | yes |            |
| 1   | 1.42  | G | 1   | 0    | 2    | 2   | 0    | 0   | 0    |     |            |
| 2   | 1.51  | C | 1   | 0    | 2    | 2   | 0    | 0   | 0    |     |            |
| 1   | 1.42  | T | 1   | 0    | 2    | 2   | 0    | 0   | 0    |     |            |
| 62  | 38.14 | A | 55  | 51   | 85   | 58  | 0    | 0   | 0    |     |            |
| 2   | 1.51  | T | 1   | 0    | 2    | 2   | 0    | 0   | 0    |     |            |
| 2   | 1.51  | A | 1   | 0    | 2    | 2   | 2.05 | 123 | 6503 | yes | COSM593    |
| 6   | 5.82  | G | 10  | 0.35 | 0.41 | 12  | 7.68 | 81  | 6503 | yes |            |
| 2   | 1.51  | T | 1   | 0    | 2    | 2   | 1.91 | 28  | 6454 | yes |            |
| 2   | 1.51  | T | 1   | 0    | 2    | 2   | 2.06 | 149 | 6503 | yes |            |
| 1   | 1.42  | T | 1   | 0    | 2    | 2   | 2.04 | 98  | 6503 | yes |            |
| 62  | 38.19 | A | 55  | 51   | 85   | 58  | 66.3 | 213 | 6503 | yes | COSM149486 |
| 2   | 1.51  | C | 1   | 0    | 2    | 2   | 2.08 | 192 | 6503 |     |            |
| 1   | 1.42  | T | 1   | 0    | 2    | 2   | 2.04 | 93  | 6503 | yes |            |
| 62  | 38.28 | A | 55  | 51   | 85   | 58  | 66.2 | 56  | 6503 | yes | COSM149487 |
| 34  | 34.11 | A | 42  | 24   | 8    | 54  | 0    | 0   | 0    | yes |            |
| 97  | 2.75  | T | 97  | 100  | 97   | 95  | 0    | 0   | 0    | yes |            |
| 84  | 16.48 | A | 75  | 71   | 91   | 92  | 0    | 0   | 0    | yes |            |
| 62  | 38.05 | C | 54  | 49   | 82   | 63  | 0    | 0   | 0    | yes |            |
| 0   | 0     |   | 0   | 0    | 0    | 0   | 0    | 66  | 5881 | yes | COSM132748 |
| 15  | 15.48 | G | 25  | 2    | 6    | 27  | 0    | 0   | 0    |     |            |
| 42  | 41.67 | G | 38  | 65   | 53   | 18  | 0    | 0   | 0    |     |            |
| 35  | 34.89 | G | 40  | 7    | 41   | 49  | 0    | 0   | 0    |     |            |
| 0   | 0     |   | 0   | 0    | 0    | 0   | 0    | 0   | 0    |     |            |
| 0   | 0     |   | 0   | 0    | 0    | 0   | 0    | 0   | 0    |     |            |
| 77  | 23.35 | A | 78  | 72   | 94   | 68  | 0    | 0   | 0    |     |            |
| 77  | 23.4  | C | 78  | 72   | 95   | 68  | 0    | 0   | 0    |     |            |
| 73  | 26.6  | A | 75  | 69   | 89   | 65  | 76.2 | 210 | 6503 |     |            |
| 0   | 0     |   | 0   | 0    | 0    | 0   | 0    | 129 | 6503 |     |            |
| 0   | 0     |   | 0   | 0    | 0    | 0   | 0    | 68  | 6488 |     | COSM228960 |

Grillet et al., Supplementary Table 3

|      |       |   |     |     |     |     |      |     |      |     |             |
|------|-------|---|-----|-----|-----|-----|------|-----|------|-----|-------------|
| 0    | 0     |   | 0   | 0   | 0   | 0   | 0    | 58  | 6480 |     |             |
| 0    | 0     |   | 0   | 0   | 0   | 0   | 0    | 38  | 5591 |     | COSM1162318 |
| 0    | 0     |   | 0   | 0   | 0   | 0   | 0    | 69  | 6483 |     |             |
| 0    | 0     |   | 0   | 0   | 0   | 0   | 0    | 72  | 6482 |     | COSM225540  |
| 0    | 0     |   | 0   | 0   | 0   | 0   | 0    | 76  | 6484 |     | COSM225541  |
| 0    | 0     |   | 0   | 0   | 0   | 0   | 0    | 142 | 6490 |     | COSM1186508 |
| 0    | 0     |   | 0   | 0   | 0   | 0   | 0    | 49  | 6163 |     |             |
| 0    | 0     |   | 0   | 0   | 0   | 0   | 0    | 197 | 5999 |     |             |
| 0    | 0     |   | 0   | 0   | 0   | 0   | 0    | 164 | 5870 |     |             |
| 0    | 0     |   | 0   | 0   | 0   | 0   | 0    | 163 | 5880 |     |             |
| 0    | 0     |   | 0   | 0   | 0   | 0   | 0.8  | 143 | 6440 |     |             |
| 0    | 0     |   | 0   | 0   | 0   | 0   | 0    | 142 | 6481 |     |             |
| 0    | 0     |   | 0   | 0   | 0   | 0   | 12.2 | 136 | 6499 |     |             |
| 0    | 0     |   | 0   | 0   | 0   | 0   | 0    | 131 | 6501 |     | COSM1567003 |
| 96   | 4.26  | G | 99  | 100 | 82  | 100 | 95.5 | 31  | 6501 | yes |             |
| 90   | 9.66  | C | 98  | 98  | 63  | 99  | 0    | 0   | 0    |     |             |
| 0    | 0     |   | 0   | 0   | 0   | 0   | 0    | 2   | 1781 |     |             |
| 0    | 0     |   | 0   | 0   | 0   | 0   | 0    | 0   | 0    |     |             |
| 26   | 25.96 |   | 32  | 23  | 32  | 21  | 0    | 0   | 0    | yes |             |
| 20   | 20.19 | C | 27  | 21  | 25  | 13  | 16.5 | 73  | 6503 |     |             |
| 0.23 | 0.23  | T | 0   | 0   | 0   | 1   | 0    | 152 | 6503 |     |             |
| 20   | 19.92 | G | 27  | 21  | 24  | 13  | 16.3 | 70  | 6503 |     |             |
| 17   | 16.58 | C | 20  | 17  | 21  | 12  | 14.4 | 89  | 6503 |     |             |
| 96   | 3.66  | A | 99  | 100 | 85  | 100 | 95.9 | 89  | 6503 | yes | COSM1430082 |
| 20   | 19.51 | A | 22  | 18  | 32  | 12  | 16.6 | 144 | 6503 | yes |             |
| 7    | 7.37  | T | 8   | 5   | 7   | 9   | 0    | 0   | 0    |     |             |
| 21   | 20.88 | T | 23  | 17  | 32  | 15  | 19.8 | 174 | 6503 | yes | COSM22413   |
| 100  | 0.18  | T | 100 | 100 | 99  | 100 | 99.7 | 153 | 6503 | yes |             |
| 100  | 0.18  | A | 100 | 100 | 99  | 100 | 0    | 0   | 0    | yes |             |
| 21   | 21.06 | C | 25  | 17  | 32  | 15  | 0    | 0   | 0    | yes |             |
| 100  | 0.18  | C | 100 | 100 | 99  | 100 | 0    | 0   | 0    |     |             |
| 99   | 1.28  | T | 100 | 100 | 95  | 100 | 0    | 0   | 0    |     |             |
| 3    | 3.39  | T | 5   | 0   | 0.2 | 7   | 4.24 | 61  | 6503 | yes |             |
| 4    | 3.53  | G | 5   | 0   | 0.2 | 8   | 0    | 0   | 0    |     |             |
| 100  | 0     | T | 100 | 100 | 100 | 100 | 0    | 0   | 0    |     |             |
| 13   | 12.64 | A | 19  | 4   | 7   | 20  | 0    | 0   | 0    |     |             |
| 0    | 0     |   | 0   | 0   | 0   | 0   | 0    | 0   | 0    |     |             |



Grillet et al., Supplementary Table 3

|      |       |   |    |    |     |      |      |     |      |     |           |
|------|-------|---|----|----|-----|------|------|-----|------|-----|-----------|
| 0    | 0     |   | 0  | 0  | 0   | 0    | 0    | 0   | 0    |     |           |
| 0    | 0     |   | 0  | 0  | 0   | 0    | 0    | 0   | 0    |     |           |
| 38   | 38.05 | C | 42 | 19 | 30  | 55   | 0    | 0   | 0    |     |           |
| 9    | 9.2   | G | 12 | 4  | 7   | 14   | 12.3 | 91  | 2283 |     | COSM87176 |
| 24   | 24.08 | G | 25 | 19 | 7   | 39   | 28.7 | 17  | 2283 |     |           |
| 25   | 25    | T | 26 | 19 | 11  | 39   | 0    | 0   | 0    | yes |           |
| 0    | 0     |   | 0  | 0  | 0   | 0    | 0    | 161 | 6503 | yes |           |
| 0.37 | 0.37  | T | 1  | 0  | 0.2 | 1    | 0.75 | 71  | 6503 | yes |           |
| 17   | 16.62 | G | 14 | 27 | 24  | 5    | 0    | 0   | 0    |     |           |
| 52   | 48.4  | A | 44 | 52 | 85  | 33   | 0    | 0   | 0    |     |           |
| 38   | 38.46 | A | 36 | 65 | 16  | 34   | 0    | 0   | 0    |     |           |
| 33   | 32.78 | C | 39 | 41 | 16  | 34   | 0    | 0   | 0    |     |           |
| 33   | 32.83 | C | 39 | 41 | 16  | 34   | 0    | 0   | 0    |     |           |
| 0    | 0     |   | 0  | 0  | 0   | 0    | 0    | 0   | 0    |     |           |
| 72   | 28.16 | C | 74 | 69 | 92  | 60   | 0    | 0   | 0    |     |           |
| 33   | 32.97 | T | 36 | 40 | 15  | 37   | 0    | 0   | 0    |     |           |
| 0    | 14.06 | A | 0  | 0  | 0   | 0    | 0    | 0   | 0    |     |           |
| 66   | 33.88 | G | 67 | 52 | 62  | 79   | 0    | 0   | 0    |     |           |
| 65   | 35.49 | A | 64 | 50 | 59  | 79   | 0    | 0   | 0    |     |           |
| 65   | 34.94 | G | 67 | 52 | 56  | 80   | 0    | 1   | 931  | yes |           |
| 79   | 21.29 | G | 77 | 70 | 78  | 87   | 85.3 | 83  | 5963 | yes |           |
| 50   | 49.82 | G | 53 | 24 | 48  | 70   | 65   | 98  | 5962 | yes |           |
| 70   | 30.22 | G | 68 | 53 | 74  | 80   | 79.9 | 65  | 6014 |     |           |
| 0    | 0     |   | 0  | 0  | 0   | 0    | 0    | 0   | 0    | yes |           |
| 70   | 30.22 | A | 68 | 53 | 74  | 80   | 80   | 76  | 5989 | yes |           |
| 0.05 | 0.05  | T | 0  | 0  | 0   | 0.13 | 0    | 0   | 0    | yes |           |
| 96   | 4.4   | G | 94 | 91 | 99  | 97   | 0    | 0   | 0    |     |           |
| 44   | 43.68 | G | 48 | 13 | 48  | 62   | 0    | 0   | 0    | yes |           |
| 0    | 0     |   | 0  | 0  | 0   | 0    | 0    | 0   | 0    |     |           |
| 0    | 0     |   | 0  | 0  | 0   | 0    | 0    | 0   | 0    |     |           |
| 0    | 0     |   | 0  | 0  | 0   | 0    | 0    | 0   | 0    | yes |           |
| 0    | 0     |   | 0  | 0  | 0   | 0    | 0    | 0   | 0    | yes |           |
| 26   | 25.73 | G | 29 | 17 | 31  | 27   | 0    | 0   | 0    |     |           |
| 22   | 21.75 | A | 21 | 16 | 38  | 16   | 23.8 | 161 | 6503 | yes |           |
| 0.46 | 0.46  | T | 1  | 0  | 0   | 1    | 0.72 | 168 | 6503 | yes |           |
| 1    | 1.01  | T | 1  | 0  | 0   | 3    | 0    | 0   | 0    |     |           |
| 27   | 0     |   | 26 | 28 | 37  | 19   | 0    | 0   | 0    |     |           |

Grillet et al., Supplementary Table 3

|      |       |   |    |     |      |      |      |     |      |     |             |
|------|-------|---|----|-----|------|------|------|-----|------|-----|-------------|
| 27   | 26.79 | A | 26 | 28  | 42   | 17   | 0    | 0   | 0    | yes |             |
| 56   | 44.19 | G | 55 | 41  | 94   | 43   | 0    | 0   | 0    |     |             |
| 1    | 0.92  | T | 2  | 0   | 0    | 2    | 0    | 0   | 0    |     |             |
| 1    | 1.01  | T | 1  | 0   | 0    | 3    | 0    | 0   | 0    |     |             |
| 0    | 0     |   | 0  | 0   | 0    | 0    | 0    | 0   | 0    | yes |             |
| 27   | 26.69 | T | 25 | 28  | 42   | 17   | 0    | 0   | 0    |     |             |
| 53   | 46.75 | T | 64 | 69  | 17   | 60   | 0    | 122 | 6502 | yes | COSM1432175 |
| 66   | 33.88 | G | 71 | 81  | 53   | 61   | 0    | 104 | 6502 | yes |             |
| 0    | 0     |   | 0  | 0   | 0    | 0    | 0    | 125 | 6502 | yes | COSM19040   |
| 0    | 0     |   | 0  | 0   | 0    | 0    | 0    | 94  | 6502 | yes | COSM13127   |
| 66   | 33.84 | G | 71 | 81  | 53   | 61   | 0    | 72  | 6501 | yes |             |
| 66   | 33.56 | G | 71 | 81  | 54   | 61   | 0    | 59  | 6502 |     |             |
| 66   | 33.7  | T | 71 | 81  | 54   | 61   | 0    | 54  | 6501 |     |             |
| 86   | 13.78 | T | 82 | 90  | 99   | 77   | 0    | 64  | 6501 | yes |             |
| 66   | 33.7  | G | 71 | 81  | 54   | 61   | 0    | 65  | 6501 | yes |             |
| 47   | 46.75 | C | 58 | 69  | 9    | 49   | 0    | 0   | 0    |     |             |
| 47   | 46.89 | G | 58 | 69  | 9    | 49   | 0    | 0   | 0    |     |             |
| 69   | 31.23 | G | 73 | 81  | 60   | 63   | 0    | 0   | 0    |     |             |
| 41   | 41.44 | T | 32 | 52  | 69   | 20   | 35.4 | 77  | 6503 | yes |             |
| 22   | 22.48 | A | 19 | 51  | 8    | 12   | 10   | 68  | 6497 | yes |             |
| 22   | 22.48 | T | 19 | 51  | 8    | 12   | 9.93 | 68  | 6503 |     |             |
| 24   | 24.18 | C | 20 | 51  | 10   | 15   | 12.6 | 75  | 6503 | yes |             |
| 77   | 22.53 | T | 80 | 49  | 92   | 88   | 89.9 | 98  | 6503 |     | COSM150019  |
| 77   | 23.08 | T | 80 | 48  | 91   | 88   | 0    | 0   | 0    |     |             |
| 22   | 21.98 | A | 25 | 44  | 2    | 17   | 0    | 0   | 0    |     |             |
| 17   | 16.9  | C | 16 | 26  | 21   | 7    | 0    | 6   | 5070 |     | COSM1442130 |
| 0    | 0     |   | 0  | 0   | 0    | 0    | 0    | 7   | 5084 |     | COSM450875  |
| 0    | 0     |   | 0  | 0   | 0    | 0    | 0    | 7   | 5093 |     | COSM1442131 |
| 0    | 0     |   | 0  | 0   | 0    | 0    | 0    | 7   | 5107 |     | COSM243137  |
| 0.14 | 0.14  | A | 0  | 0   | 0.41 | 0.13 | 0.02 | 8   | 5182 |     | COSM222476  |
| 14   | 13.51 | C | 12 | 14  | 5    | 20   | 16.9 | 77  | 6503 | yes |             |
| 76   | 23.63 | A | 66 | 89  | 90   | 63   | 73.4 | 50  | 6503 |     |             |
| 28   | 28.34 | C | 30 | 19  | 30   | 33   | 0    | 0   | 0    |     |             |
| 99   | 0.87  | T | 99 | 100 | 100  | 98   | 0    | 0   | 0    |     |             |
| 0    | 0     |   | 0  | 0   | 0    | 0    | 0    | 13  | 5889 | yes |             |
| 0    | 0     |   | 0  | 0   | 0    | 0    | 0    | 20  | 5864 | yes | COSM1076231 |
| 0    | 0     |   | 0  | 0   | 0    | 0    | 0    | 19  | 5854 | yes |             |

Grillet et al., Supplementary Table 3

|    |       |   |    |      |      |    |      |     |      |     |             |
|----|-------|---|----|------|------|----|------|-----|------|-----|-------------|
| 0  | 0     |   | 0  | 0    | 0    | 0  | 0    | 18  | 5822 | yes |             |
| 45 | 45.42 | T | 47 | 37   | 47   | 50 | 51.5 | 101 | 6503 | yes | COSM1451542 |
| 30 | 29.85 | A | 30 | 53   | 6    | 28 | 20.3 | 113 | 6503 |     |             |
| 37 | 36.9  | A | 38 | 54   | 19   | 35 | 30.5 | 90  | 6503 |     |             |
| 37 | 37.04 | G | 38 | 54   | 20   | 35 | 0    | 0   | 0    |     |             |
| 38 | 38.28 | A | 38 | 54   | 25   | 35 | 32.3 | 125 | 6503 | yes |             |
| 42 | 41.85 | A | 51 | 13   | 40   | 61 | 54.2 | 97  | 6503 | yes | COSM1451600 |
| 91 | 9.43  | T | 88 | 92   | 94   | 89 | 88.9 | 143 | 6503 | yes |             |
| 92 | 8.24  | A | 90 | 92   | 99   | 88 | 0    | 0   | 0    |     |             |
| 16 | 15.61 | T | 29 | 5    | 2    | 27 | 0    | 0   | 0    |     |             |
| 16 | 15.84 | G | 17 | 7    | 4    | 30 | 0    | 0   | 0    |     |             |
| 3  | 3.25  | T | 5  | 0.17 | 0.41 | 6  | 5.03 | 150 | 6503 | yes |             |
| 84 | 15.61 | A | 83 | 88   | 96   | 75 | 0    | 0   | 0    |     |             |
| 84 | 15.61 | A | 83 | 88   | 96   | 75 | 0    | 0   | 0    |     |             |
| 98 | 1.65  | C | 97 | 100  | 100  | 97 | 0    | 0   | 0    |     |             |
| 0  | 0     |   | 0  | 0    | 0    | 0  | 0    | 0   | 0    |     |             |
| 0  | 0     |   | 0  | 0    | 0    | 0  | 0    | 0   | 0    |     |             |
| 0  | 0     |   | 0  | 0    | 0    | 0  | 0    | 0   | 0    |     |             |
| 0  | 0     |   | 0  | 0    | 0    | 0  | 0    | 0   | 0    |     |             |
| 85 | 15.11 | C | 83 | 88   | 98   | 75 | 0    | 0   | 0    |     |             |
| 94 | 5.68  | A | 94 | 100  | 86   | 96 | 91.7 | 66  | 6503 | yes |             |
| 94 | 5.54  | T | 95 | 100  | 86   | 96 | 91.9 | 68  | 6503 | yes |             |
| 26 | 26.1  | T | 36 | 28   | 7    | 32 | 23.9 | 198 | 6503 | yes |             |
| 23 | 22.53 | T | 26 | 29   | 7    | 26 | 0    | 0   | 0    |     |             |
| 43 | 42.67 | A | 44 | 45   | 37   | 44 | 0    | 0   | 0    |     |             |
| 0  | 0     |   | 0  | 0    | 0    | 0  | 0    | 0   | 0    |     |             |
| 0  | 0     |   | 0  | 0    | 0    | 0  | 0    | 0   | 0    |     |             |
| 0  | 0     |   | 0  | 0    | 0    | 0  | 0    | 0   | 0    |     |             |
| 23 | 22.8  | C | 26 | 29   | 7    | 27 | 0    | 0   | 0    |     |             |
| 12 | 12.04 | G | 14 | 28   | 4    | 4  | 0    | 0   | 0    |     |             |
| 0  | 0     |   | 0  | 0    | 0    | 0  | 0    | 107 | 6503 | yes | COSM18443   |
| 5  | 5.08  | A | 2  | 2    | 5    | 8  | 0    | 0   | 0    |     |             |
| 2  | 2.47  | A | 3  | 1    | 3    | 3  | 0    | 0   | 0    |     |             |
| 0  | 0     |   | 0  | 0    | 0    | 0  | 0    | 0   | 0    |     |             |
| 0  | 0     |   | 0  | 0    | 0    | 0  | 0    | 0   | 0    |     |             |
| 5  | 5.36  | G | 4  | 1    | 15   | 3  | 4.73 | 48  | 6503 | yes |             |
| 3  | 2.84  | A | 3  | 1    | 5    | 3  | 2.11 | 56  | 6503 | yes |             |

Grillet et al., Supplementary Table 3

|    |       |   |    |    |    |    |      |     |      |     |            |
|----|-------|---|----|----|----|----|------|-----|------|-----|------------|
| 3  | 2.93  | A | 3  | 1  | 5  | 3  | 2.04 | 42  | 6499 | yes |            |
| 17 | 17.03 |   | 10 | 2  | 54 | 7  | 0    | 0   | 0    |     |            |
| 75 | 25.41 | G | 74 | 67 | 95 | 67 | 76.9 | 21  | 5996 | yes |            |
| 0  | 0     |   | 0  | 0  | 0  | 0  | 0    | 0   | 0    | yes |            |
| 0  | 0     |   | 0  | 0  | 0  | 0  | 0    | 134 | 6502 | yes | COSM150424 |
| 0  | 0     |   | 0  | 0  | 0  | 0  | 0    | 27  | 6350 | yes | COSM150426 |
| 0  | 0     |   | 0  | 0  | 0  | 0  | 0    | 28  | 5644 | yes | COSM253767 |
| 0  | 0     |   | 0  | 0  | 0  | 0  | 0    | 28  | 5641 | yes | COSM150428 |
| 0  | 0     |   | 0  | 0  | 0  | 0  | 0    | 74  | 6485 |     |            |
| 0  | 0     |   | 0  | 0  | 0  | 0  | 0    | 134 | 6501 | yes |            |
| 0  | 0     |   | 0  | 0  | 0  | 0  | 0    | 451 | 6503 | yes | COSM452727 |
| 0  | 0     |   | 0  | 0  | 0  | 0  | 0    | 332 | 6503 | yes |            |
| 0  | 0     |   | 0  | 0  | 0  | 0  | 0    | 421 | 6503 | yes |            |
| 0  | 0     |   | 0  | 0  | 0  | 0  | 0    | 256 | 6503 | yes |            |
| 0  | 0     |   | 0  | 0  | 0  | 0  | 0    | 0   | 0    | yes |            |
| 44 | 44.32 | C | 65 | 40 | 18 | 55 | 0    | 0   | 0    |     |            |
| 64 | 36.36 | G | 76 | 54 | 59 | 68 | 0    | 0   | 0    |     |            |
| 4  | 3.57  | G | 7  | 4  | 1  | 4  | 0    | 0   | 0    |     |            |
| 75 | 24.77 | G | 67 | 85 | 94 | 60 | 0    | 0   | 0    | yes |            |
| 51 | 48.72 |   | 52 | 46 | 67 | 45 | 0    | 0   | 0    | yes |            |
| 14 | 13.55 | G | 22 | 16 | 1  | 16 | 12.4 | 130 | 6503 |     | COSM150521 |
| 0  | 0     |   | 0  | 0  | 0  | 0  | 0    | 279 | 6466 | yes |            |
| 0  | 0     |   | 0  | 0  | 0  | 0  | 0    | 122 | 6241 |     |            |
| 9  | 9.11  | A | 13 | 3  | 2  | 17 | 11.8 | 129 | 6224 |     |            |
| 26 | 25.96 | C | 29 | 26 | 24 | 26 | 24.5 | 71  | 6419 | yes |            |
| 23 | 22.66 | T | 33 | 13 | 2  | 38 | 29.5 | 37  | 6418 |     | COSM454169 |
| 65 | 35.3  | T | 73 | 37 | 73 | 77 | 77   | 15  | 6313 |     |            |
| 31 | 31    | T | 43 | 25 | 4  | 47 | 35.4 | 32  | 6283 |     |            |
| 54 | 45.97 | T | 69 | 28 | 49 | 69 | 65.6 | 38  | 6314 |     |            |
| 12 | 12.04 | A | 19 | 3  | 8  | 18 | 13.5 | 17  | 6222 |     |            |
| 11 | 10.67 | C | 19 | 3  | 2  | 18 | 12.5 | 89  | 6233 | yes |            |
| 56 | 43.82 | T | 70 | 29 | 59 | 69 | 68.2 | 23  | 6379 |     | COSM454171 |
| 52 | 47.71 | C | 68 | 28 | 44 | 68 | 63.1 | 5   | 5919 |     | COSM454172 |
| 31 | 31.41 | A | 42 | 25 | 4  | 49 | 36   | 13  | 6053 | yes | COSM454173 |
| 32 | 32.01 | T | 44 | 25 | 4  | 50 | 37   | 25  | 6393 | yes |            |
| 88 | 11.54 | C | 91 | 97 | 81 | 85 | 84.9 | 105 | 6503 |     | COSM14251  |
| 50 | 49.95 | T | 50 | 65 | 15 | 61 | 0    | 0   | 0    |     |            |

Grillet et al., Supplementary Table 3

|     |       |   |     |      |      |     |      |     |      |     |             |
|-----|-------|---|-----|------|------|-----|------|-----|------|-----|-------------|
| 15  | 14.84 | C | 14  | 25   | 2    | 16  | 0    | 0   | 0    |     |             |
| 57  | 43.36 | A | 46  | 75   | 62   | 45  | 0    | 0   | 0    |     |             |
| 72  | 27.84 | C | 64  | 93   | 89   | 50  | 0    | 0   | 0    |     |             |
| 70  | 30.4  | G | 66  | 93   | 64   | 58  | 58.1 | 52  | 6454 | yes |             |
| 58  | 41.62 | G | 51  | 88   | 58   | 40  | 40.8 | 64  | 6394 | yes | COSM1461158 |
| 56  | 44.41 | A | 46  | 78   | 70   | 33  | 39.8 | 118 | 6466 |     |             |
| 71  | 29.4  | A | 59  | 84   | 94   | 51  | 60.9 | 28  | 6391 |     |             |
| 3   | 3.39  | T | 4   | 0    | 0.41 | 7   | 5.5  | 76  | 6503 | yes |             |
| 85  | 14.88 | G | 87  | 98   | 75   | 81  | 0    | 0   | 0    |     |             |
| 72  | 28.39 | C | 64  | 51   | 82   | 84  | 0    | 0   | 0    |     |             |
| 22  | 21.79 | A | 23  | 38   | 13   | 14  | 0    | 0   | 0    | yes |             |
| 97  | 2.66  | T | 98  | 95   | 96   | 99  | 0    | 0   | 0    | yes |             |
| 0   | 0     |   | 0   | 0    | 0    | 0   | 0    | 0   | 0    | yes |             |
| 99  | 1.1   | A | 100 | 100  | 95   | 100 | 99   | 78  | 6503 | yes |             |
| 41  | 41.39 | A | 65  | 40   | 10   | 52  | 43.5 | 85  | 2283 | yes | COSM147070  |
| 43  | 42.58 | T | 61  | 40   | 17   | 53  | 0    | 0   | 0    |     |             |
| 99  | 1.47  | T | 99  | 100  | 94   | 100 | 0    | 0   | 0    |     |             |
| 82  | 17.58 | T | 81  | 92   | 79   | 78  | 76.7 | 156 | 6503 | yes |             |
| 86  | 13.97 | C | 86  | 100  | 67   | 88  | 0    | 0   | 0    |     |             |
| 0   | 13.97 | C | 0   | 0    | 0    | 0   | 0    | 0   | 0    |     |             |
| 2   | 1.69  | C | 2   | 0.35 | 0.2  | 3   | 0    | 0   | 0    | yes |             |
| 6   | 5.86  | T | 4   | 1    | 16   | 3   | 5.94 | 115 | 6494 | yes |             |
| 42  | 42.08 | A | 38  | 56   | 19   | 49  | 38.7 | 85  | 6494 | yes | COSM1179751 |
| 53  | 47.02 | C | 43  | 85   | 18   | 56  | 0    | 0   | 0    |     |             |
| 57  | 42.86 | C | 45  | 87   | 18   | 66  | 0    | 0   | 0    |     |             |
| 48  | 48.49 | A | 63  | 44   | 24   | 61  | 0    | 0   | 0    |     |             |
| 0   | 0     |   | 0   | 0    | 0    | 0   | 0.01 | 61  | 6499 | yes | COSM1350749 |
| 100 | 0     | A | 100 | 100  | 100  | 100 | 0    | 104 | 6496 |     |             |
| 51  | 49.18 | G | 64  | 44   | 34   | 61  | 0    | 0   | 0    |     |             |
| 50  | 49.86 | C | 63  | 44   | 32   | 60  | 0    | 0   | 0    |     |             |
| 52  | 47.99 | G | 64  | 44   | 39   | 61  | 0    | 0   | 0    |     |             |
| 66  | 34.16 | T | 78  | 50   | 59   | 76  | 0    | 0   | 0    |     |             |
| 30  | 29.58 | G | 23  | 4    | 74   | 23  | 39.2 | 30  | 6496 | yes |             |
| 64  | 36.17 | C | 58  | 85   | 43   | 64  | 0    | 0   | 0    | yes |             |
| 55  | 44.78 | A | 54  | 77   | 32   | 54  | 0    | 0   | 0    | yes |             |
| 0   | 0     |   | 0   | 0    | 0    | 0   | 0    | 0   | 0    | yes |             |
| 55  | 44.87 | T | 54  | 77   | 32   | 54  | 0    | 0   | 0    | yes |             |

Grillet et al., Supplementary Table 3

|     |       |   |     |     |     |     |      |     |      |     |             |
|-----|-------|---|-----|-----|-----|-----|------|-----|------|-----|-------------|
| 55  | 44.87 | T | 54  | 77  | 32  | 54  | 0    | 0   | 0    |     |             |
| 1   | 1.28  | T | 1   | 0   | 4   | 1   | 0    | 0   | 0    | yes |             |
| 55  | 45.1  | A | 54  | 77  | 31  | 54  | 0    | 0   | 0    |     |             |
| 55  | 44.87 | G | 54  | 77  | 32  | 54  | 0    | 0   | 0    | yes |             |
| 55  | 45.1  | A | 54  | 77  | 32  | 54  | 0    | 0   | 0    | yes |             |
| 53  | 46.84 | T | 54  | 77  | 23  | 54  | 0    | 0   | 0    |     |             |
| 99  | 0.87  | T | 100 | 100 | 96  | 100 | 0    | 0   | 0    |     |             |
| 15  | 15.16 | A | 15  | 11  | 12  | 21  | 0    | 0   | 0    | yes |             |
| 100 | 0.05  | T | 100 | 100 | 100 | 100 | 0    | 0   | 0    |     |             |
| 17  | 16.58 | G | 15  | 11  | 18  | 21  | 0    | 0   | 0    |     |             |
| 16  | 15.52 | C | 15  | 11  | 13  | 21  | 0    | 0   | 0    |     |             |
| 55  | 44.6  | A | 55  | 77  | 33  | 54  | 0    | 0   | 0    |     |             |
| 100 | 0.23  | G | 100 | 100 | 99  | 100 | 0    | 0   | 0    | yes |             |
| 53  | 47.25 | A | 54  | 77  | 21  | 54  | 0    | 0   | 0    | yes |             |
| 17  | 16.58 | G | 15  | 11  | 18  | 21  | 20.1 | 65  | 6490 | yes |             |
| 55  | 44.83 | T | 54  | 77  | 32  | 54  | 0    | 0   | 0    |     |             |
| 100 | 0.05  | C | 100 | 100 | 100 | 100 | 99.9 | 118 | 6503 | yes |             |
| 18  | 18.09 | C | 18  | 11  | 16  | 25  | 22.6 | 106 | 6503 | yes |             |
| 97  | 2.61  | G | 99  | 100 | 89  | 100 | 0    | 59  | 6503 | yes |             |
| 44  | 44.32 | C | 41  | 35  | 37  | 58  | 0    | 91  | 6503 | yes | COSM1128598 |
| 10  | 10.12 | G | 14  | 9   | 13  | 7   | 0    | 76  | 6501 | yes |             |
| 10  | 9.94  | A | 13  | 9   | 13  | 7   | 0    | 82  | 6503 | yes |             |
| 7   | 7.14  | A | 12  | 10  | 1   | 7   | 0    | 88  | 6503 | yes |             |
| 65  | 34.52 | C | 71  | 47  | 77  | 69  | 0    | 69  | 6498 | yes |             |
| 54  | 46.43 | A | 62  | 45  | 55  | 55  | 0    | 60  | 6495 | yes | COSM289938  |
| 54  | 46.47 | T | 62  | 45  | 54  | 55  | 0    | 130 | 6503 | yes |             |
| 55  | 45.05 | T | 55  | 44  | 46  | 68  | 0    | 59  | 6502 |     |             |
| 10  | 10.21 | C | 7   | 0   | 20  | 13  | 0    | 0   | 0    |     |             |
| 55  | 44.73 | A | 55  | 44  | 48  | 68  | 0    | 0   | 0    |     |             |
| 55  | 44.73 | C | 55  | 44  | 48  | 68  | 0    | 0   | 0    |     |             |
| 55  | 44.73 | G | 55  | 44  | 48  | 68  | 0    | 0   | 0    |     |             |
| 55  | 44.73 | T | 55  | 44  | 48  | 68  | 0    | 0   | 0    |     |             |
| 12  | 12.5  | A | 19  | 27  | 5   | 4   | 3.81 | 47  | 6051 | yes |             |
| 25  | 24.63 | C | 24  | 39  | 3   | 28  | 25.1 | 83  | 6134 | yes | COSM147495  |
| 41  | 40.52 | T | 30  | 41  | 56  | 35  | 42.2 | 10  | 6471 | yes | COSM431202  |
| 39  | 38.92 | A | 34  | 40  | 45  | 37  | 41.7 | 21  | 5898 | yes |             |
| 37  | 36.68 | A | 30  | 39  | 41  | 35  | 38.5 | 49  | 6052 | yes | COSM147497  |

Grillet et al., Supplementary Table 3

|    |       |   |     |     |     |     |      |     |      |     |  |
|----|-------|---|-----|-----|-----|-----|------|-----|------|-----|--|
| 83 | 17.26 | G | 93  | 95  | 53  | 88  | 0    | 0   | 0    | yes |  |
| 32 | 31.82 | T | 28  | 47  | 10  | 36  | 0    | 0   | 0    |     |  |
| 98 | 2.2   | A | 100 | 100 | 90  | 100 | 0    | 0   | 0    |     |  |
| 0  | 0     |   | 0   | 0   | 0   | 0   | 0    | 0   | 0    |     |  |
| 0  | 0     |   | 0   | 0   | 0   | 0   | 0    | 0   | 0    |     |  |
| 0  | 0     |   | 0   | 0   | 0   | 0   | 0    | 0   | 0    |     |  |
| 0  | 0     |   | 0   | 0   | 0   | 0   | 0    | 0   | 0    |     |  |
| 33 | 33.24 | C | 28  | 52  | 10  | 37  | 0    | 0   | 0    | yes |  |
| 16 | 15.89 | A | 27  | 3   | 10  | 24  | 0    | 0   | 0    | yes |  |
| 98 | 2.15  | A | 100 | 100 | 91  | 100 | 97.3 | 108 | 6014 | yes |  |
| 62 | 38.23 | G | 60  | 50  | 79  | 60  | 66.2 | 113 | 5965 | yes |  |
| 10 | 10.07 | T | 6   | 0   | 35  | 4   | 0    | 0   | 0    | yes |  |
| 1  | 0.73  | C | 1   | 0   | 0.2 | 1   | 0    | 0   | 0    | yes |  |
| 97 | 2.66  | A | 98  | 100 | 92  | 99  | 0    | 0   | 0    |     |  |
| 51 | 49.45 | T | 45  | 39  | 67  | 51  | 0    | 0   | 0    |     |  |
| 46 | 46.06 | T | 50  | 51  | 34  | 48  | 0    | 0   | 0    |     |  |
| 57 | 43.18 | G | 61  | 75  | 30  | 58  | 52.3 | 145 | 6503 | yes |  |
| 96 | 4.08  | G | 97  | 100 | 86  | 99  | 96   | 106 | 6503 |     |  |
| 22 | 21.84 |   | 19  | 37  | 5   | 23  | 0    | 43  | 6503 |     |  |
| 28 | 27.88 | G | 23  | 38  | 16  | 29  | 0    | 61  | 6502 | yes |  |
| 18 | 17.9  | C | 15  | 18  | 20  | 18  | 0    | 28  | 6499 |     |  |
| 97 | 2.56  | A | 99  | 100 | 89  | 100 | 97.6 | 58  | 6501 | yes |  |
| 97 | 2.56  | G | 99  | 100 | 89  | 100 | 97.6 | 50  | 6503 |     |  |
| 25 | 24.54 | G | 20  | 39  | 16  | 22  | 0    | 74  | 6503 | yes |  |
| 98 | 2.24  | T | 99  | 100 | 90  | 100 | 0    | 47  | 6501 |     |  |
| 16 | 15.57 | C | 11  | 23  | 2   | 21  | 0    | 0   | 0    |     |  |
| 22 | 21.61 | G | 18  | 38  | 5   | 22  | 0    | 0   | 0    |     |  |
| 0  | 0     |   | 0   | 0   | 0   | 0   | 0    | 0   | 0    |     |  |
| 0  | 0     |   | 0   | 0   | 0   | 0   | 0    | 0   | 0    |     |  |
| 0  | 0     |   | 0   | 0   | 0   | 0   | 0    | 0   | 0    |     |  |
| 0  | 0     |   | 0   | 0   | 0   | 0   | 0    | 0   | 0    |     |  |
| 63 | 37.18 | C | 64  | 87  | 40  | 59  | 53.9 | 47  | 6281 | yes |  |
| 45 | 44.69 | C | 47  | 60  | 25  | 45  | 40.3 | 47  | 6503 | yes |  |
| 31 | 31.32 | T | 39  | 56  | 9   | 24  | 20.2 | 28  | 6502 | yes |  |
| 24 | 24.31 | A | 25  | 12  | 34  | 27  | 0    | 0   | 0    |     |  |
| 0  | 0     |   | 0   | 0   | 0   | 0   | 0    | 0   | 0    |     |  |
| 87 | 13.19 | C | 90  | 97  | 74  | 86  | 0    | 0   | 0    |     |  |

Grillet et al., Supplementary Table 3

|    |       |   |    |    |    |    |      |     |      |     |             |
|----|-------|---|----|----|----|----|------|-----|------|-----|-------------|
| 60 | 39.79 | G | 72 | 61 | 33 | 72 | 0    | 92  | 6502 |     | COSM45985   |
| 64 | 36.36 | G | 72 | 61 | 49 | 71 | 66.7 | 24  | 6502 |     |             |
| 51 | 49.31 | C | 53 | 21 | 74 | 57 | 0    | 0   | 0    |     |             |
| 0  | 0     |   | 0  | 0  | 0  | 0  | 0    | 79  | 6501 | yes |             |
| 0  | 0     |   | 0  | 0  | 0  | 0  | 0    | 80  | 6503 | yes |             |
| 0  | 0     |   | 0  | 0  | 0  | 0  | 0    | 84  | 6503 | yes |             |
| 0  | 0     |   | 0  | 0  | 0  | 0  | 0    | 87  | 6503 | yes |             |
| 0  | 0     |   | 0  | 0  | 0  | 0  | 0    | 89  | 6503 | yes |             |
| 0  | 0     |   | 0  | 0  | 0  | 0  | 0    | 94  | 6503 | yes |             |
| 55 | 45.05 | G | 58 | 59 | 22 | 72 | 57.4 | 72  | 6499 | yes |             |
| 61 | 38.78 | T | 51 | 47 | 79 | 65 | 0    | 0   | 0    |     |             |
| 44 | 43.68 | C | 45 | 37 | 21 | 63 | 0    | 0   | 0    |     |             |
| 78 | 22.16 | A | 79 | 78 | 67 | 84 | 0    | 0   | 0    |     |             |
| 0  | 0     |   | 0  | 0  | 0  | 0  | 0    | 0   | 0    |     |             |
| 0  | 0     |   | 0  | 0  | 0  | 0  | 0    | 0   | 0    |     |             |
| 0  | 0     |   | 0  | 0  | 0  | 0  | 0    | 0   | 0    |     |             |
| 62 | 38.32 | C | 60 | 64 | 53 | 66 | 0    | 0   | 0    |     |             |
| 6  | 6.14  | G | 8  | 0  | 8  | 9  | 9.78 | 298 | 6503 | yes |             |
| 51 | 49.27 | G | 41 | 52 | 63 | 46 | 0    | 0   | 0    |     |             |
| 43 | 42.95 | T | 55 | 34 | 21 | 58 | 0    | 0   | 0    |     |             |
| 45 | 44.87 | A | 57 | 33 | 24 | 62 | 54   | 15  | 6402 | yes |             |
| 89 | 10.94 | T | 91 | 82 | 94 | 90 | 91.1 | 12  | 6351 |     |             |
| 35 | 34.75 | A | 47 | 31 | 9  | 49 | 39.5 | 55  | 6503 | yes |             |
| 44 | 44.37 | G | 61 | 44 | 19 | 54 | 0    | 0   | 0    | yes |             |
| 22 | 22.21 | A | 17 | 12 | 26 | 29 | 0    | 0   | 0    |     |             |
| 8  | 8.29  | G | 10 | 4  | 3  | 14 | 0    | 0   | 0    |     |             |
| 39 | 39.1  | T | 50 | 33 | 18 | 53 | 0    | 0   | 0    | yes |             |
| 12 | 12.36 | T | 12 | 2  | 3  | 26 | 0    | 55  | 6503 | yes | COSM437264  |
| 0  | 0     |   | 0  | 0  | 0  | 0  | 0    | 0   | 0    | yes |             |
| 39 | 39.19 | C | 47 | 53 | 18 | 38 | 36.5 | 36  | 6499 |     |             |
| 59 | 40.93 | A | 61 | 80 | 61 | 41 | 0    | 0   | 0    | yes |             |
| 36 | 36.03 | A | 46 | 54 | 5  | 38 | 0    | 0   | 0    |     |             |
| 0  | 0     |   | 0  | 0  | 0  | 0  | 0    | 0   | 0    |     |             |
| 0  | 0     |   | 0  | 0  | 0  | 0  | 0    | 0   | 0    | yes |             |
| 53 | 47.25 | G | 47 | 50 | 54 | 57 | 0    | 89  | 2283 |     |             |
| 0  | 0     |   | 0  | 0  | 0  | 0  | 53.4 | 0   | 0    |     | COSM1480329 |
| 11 | 11.13 | T | 9  | 19 | 2  | 12 | 0    | 0   | 0    |     |             |



Grillet et al., Supplementary Table 3

|      |       |   |      |      |      |      |      |     |      |     |             |
|------|-------|---|------|------|------|------|------|-----|------|-----|-------------|
| 13   | 13.23 | A | 20   | 21   | 2    | 11   | 9.55 | 94  | 6503 | yes |             |
| 93   | 7.14  | A | 94   | 97   | 99   | 85   | 90   | 107 | 6503 | yes |             |
| 0.27 | 0.27  | G | 0.28 | 0.17 | 0.41 | 0.26 | 0    | 0   | 0    | yes |             |
| 100  | 0     |   | 100  | 100  | 100  | 100  | 0    | 0   | 0    |     |             |
| 0.41 | 0.41  | A | 0.28 | 0    | 0.2  | 1    | 0    | 0   | 0    |     |             |
| 100  | 0     | A | 100  | 100  | 100  | 100  | 0    | 0   | 0    |     |             |
| 0    | 0     |   | 0    | 0    | 0    | 0    | 0    | 159 | 6503 | yes | COSM1158192 |
| 0    | 0     |   | 0    | 0    | 0    | 0    | 0    | 44  | 6503 | yes | COSM1389083 |
| 1    | 1.33  | G | 4    | 0    | 0.2  | 2    | 0    | 0   | 0    |     |             |
| 1    | 1.33  | A | 4    | 0    | 0.2  | 2    | 0    | 0   | 0    |     |             |
| 0    | 0     |   | 0    | 0    | 0    | 0    | 0    | 0   | 0    |     |             |
| 28   | 28.39 | G | 23   | 27   | 59   | 11   | 26.5 | 64  | 6503 | yes |             |
| 35   | 34.98 | A | 30   | 55   | 26   | 29   | 26.9 | 86  | 6503 |     |             |
| 97   | 3.39  | G | 93   | 98   | 96   | 98   | 99.3 | 2   | 882  | yes |             |
| 100  | 0     |   | 100  | 100  | 100  | 100  | 99.7 | 0   | 0    | yes | COSM1480944 |
| 0    | 0     |   | 0    | 0    | 0    | 0    | 0    | 2   | 3745 | yes |             |
| 0    | 0     |   | 0    | 0    | 0    | 0    | 0    | 1   | 3495 | yes |             |
| 56   | 43.64 | A | 45   | 52   | 82   | 48   | 57.9 | 64  | 6070 |     |             |
| 96   | 4.12  | C | 95   | 97   | 99   | 93   | 95.4 | 46  | 6503 |     |             |
| 31   | 31.27 | C | 44   | 16   | 31   | 37   | 36.6 | 82  | 6503 |     |             |
| 50   | 49.54 | G | 53   | 22   | 79   | 49   | 60.9 | 46  | 6503 |     |             |
| 50   | 49.54 | G | 53   | 22   | 79   | 49   | 61   | 43  | 6503 |     |             |
| 19   | 19.37 | T | 19   | 7    | 7    | 37   | 24.4 | 7   | 5934 | yes |             |
| 62   | 37.73 | T | 49   | 52   | 92   | 57   | 66.3 | 52  | 6503 | yes |             |
| 94   | 6.23  | T | 90   | 100  | 99   | 87   | 90   | 164 | 6503 | yes |             |
| 100  | 0     | T | 100  | 100  | 100  | 100  | 100  | 105 | 6503 |     |             |
| 42   | 41.85 | C | 37   | 74   | 17   | 36   | 32   | 92  | 6503 |     |             |
| 41   | 41.03 | G | 35   | 74   | 17   | 35   | 30.5 | 104 | 6503 | yes |             |
| 41   | 40.98 | C | 35   | 74   | 17   | 35   | 0    | 0   | 0    |     |             |
| 43   | 43.18 | G | 36   | 74   | 26   | 35   | 0    | 0   | 0    | yes |             |
| 2    | 2.24  | C | 2    | 0    | 0    | 5    | 0    | 0   | 0    |     |             |
| 56   | 43.96 | C | 47   | 76   | 65   | 39   | 0    | 0   | 0    |     |             |
| 71   | 28.62 | T | 56   | 87   | 88   | 56   | 0    | 0   | 0    |     |             |
| 80   | 19.69 | T | 80   | 79   | 95   | 72   | 79   | 64  | 6503 | yes |             |
| 68   | 31.5  | C | 64   | 78   | 71   | 62   | 0    | 0   | 0    | yes |             |
| 82   | 18.27 | C | 76   | 89   | 99   | 68   | 0    | 0   | 0    |     |             |
| 35   | 35.03 | A | 43   | 27   | 34   | 38   | 0    | 0   | 0    |     |             |

Grillet et al., Supplementary Table 3

|    |       |   |    |     |    |     |      |     |      |     |  |
|----|-------|---|----|-----|----|-----|------|-----|------|-----|--|
| 0  | 0     |   | 0  | 0   | 0  | 0   | 0    | 0   | 0    | yes |  |
| 37 | 36.86 | T | 40 | 35  | 22 | 46  | 0    | 2   | 3973 |     |  |
| 85 | 14.51 | T | 86 | 100 | 58 | 92  | 0    | 0   | 0    |     |  |
| 37 | 36.54 | G | 51 | 10  | 53 | 39  | 44.5 | 7   | 2236 |     |  |
| 67 | 33.42 | T | 77 | 79  | 51 | 62  | 58.3 | 205 | 6503 |     |  |
| 0  | 0     |   | 0  | 0   | 0  | 0   | 0    | 79  | 6503 | yes |  |
| 23 | 23.03 |   | 52 | 6   | 11 | 30  | 22.1 | 0   | 0    | yes |  |
| 0  | 0     |   | 0  | 0   | 0  | 0   | 0    | 0   | 0    |     |  |
| 0  | 0     |   | 0  | 0   | 0  | 0   | 0    | 0   | 0    |     |  |
| 0  | 0     |   | 0  | 0   | 0  | 0   | 0    | 0   | 0    |     |  |
| 0  | 0     |   | 0  | 0   | 0  | 0   | 0    | 0   | 0    |     |  |
| 0  | 0     |   | 0  | 0   | 0  | 0   | 0    | 0   | 0    |     |  |
| 0  | 0     |   | 0  | 0   | 0  | 0   | 0    | 0   | 0    |     |  |
| 43 | 42.92 | T | 41 | 48  | 28 | 49  | 0    | 0   | 0    | yes |  |
| 82 | 17.6  | G | 91 | 69  | 69 | 97  | 0    | 0   | 0    |     |  |
| 78 | 22.36 |   | 89 | 77  | 40 | 97  | 0    | 0   | 0    |     |  |
| 81 | 0     |   | 90 | 77  | 54 | 97  | 0    | 0   | 0    |     |  |
| 0  | 0     |   | 0  | 0   | 0  | 0   | 0    | 134 | 6503 | yes |  |
| 71 | 29.05 | T | 80 | 100 | 9  | 86  | 0    | 0   | 0    |     |  |
| 0  | 0     |   | 0  | 0   | 0  | 0   | 0    | 0   | 0    |     |  |
| 88 | 12.05 | T | 94 | 100 | 52 | 100 | 0    | 0   | 0    |     |  |
| 88 | 12.05 | T | 94 | 100 | 52 | 100 | 0    | 0   | 0    |     |  |
| 88 | 12.12 | C | 94 | 100 | 51 | 100 | 0    | 0   | 0    |     |  |
| 88 | 0     |   | 94 | 100 | 51 | 99  | 0    | 0   | 0    |     |  |
| 88 | 12.12 | C | 94 | 100 | 51 | 100 | 0    | 0   | 0    | yes |  |
| 0  | 0     |   | 0  | 0   | 0  | 0   | 0    | 0   | 0    | yes |  |
| 41 | 40.93 | A | 41 | 65  | 46 | 19  | 0    | 0   | 0    |     |  |







Grillet et al., Supplementary Table 3

|   |   |        |                                |
|---|---|--------|--------------------------------|
|   |   |        |                                |
| C | T | CRIPAK | pancreas                       |
|   |   |        |                                |
| T | C | CRIPAK | large_intestine                |
| C | T | CRIPAK | skin,large_intestine           |
| G | A | CRIPAK | lung                           |
|   |   |        |                                |
|   |   |        |                                |
|   |   |        |                                |
|   |   |        |                                |
|   |   |        |                                |
|   |   |        |                                |
| T | C | CRIPAK | large_intestine                |
|   |   |        |                                |
|   |   |        |                                |
|   |   |        |                                |
|   |   |        |                                |
|   |   |        |                                |
|   |   |        |                                |
|   |   |        |                                |
| A | G | PDGFRA | large_intestine                |
|   |   |        |                                |
|   |   |        |                                |
| C | T | PDGFRA | soft_tissue,endometrium,centr. |
|   |   |        |                                |
|   |   |        |                                |
|   |   |        |                                |
|   |   |        |                                |
|   |   |        |                                |
|   |   |        |                                |
|   |   |        |                                |
|   |   |        |                                |







|   |   |                     |                 |
|---|---|---------------------|-----------------|
|   |   |                     |                 |
| C | T | EGFR_ENST0000034457 | large_intestine |
|   |   |                     |                 |
|   |   |                     |                 |
|   |   |                     |                 |
| G | A | EGFR                | large_intestine |
|   |   |                     |                 |
|   |   |                     |                 |
|   |   |                     |                 |
|   |   |                     |                 |
|   |   |                     |                 |
|   |   |                     |                 |
|   |   |                     |                 |
|   |   |                     |                 |
|   |   |                     |                 |
|   |   |                     |                 |
|   |   |                     |                 |
|   |   |                     |                 |
|   |   |                     |                 |
|   |   |                     |                 |
|   |   |                     |                 |
|   |   |                     |                 |
|   |   |                     |                 |
|   |   |                     |                 |
|   |   |                     |                 |
|   |   |                     |                 |
|   |   |                     |                 |
|   |   |                     |                 |
|   |   |                     |                 |
|   |   |                     |                 |
|   |   |                     |                 |
| A | G | BRAF                | skin,prostate   |
|   |   |                     |                 |
|   |   |                     |                 |
|   |   |                     |                 |
|   |   |                     |                 |
|   |   |                     |                 |

Grillet et al., Supplementary Table 3

|   |   |                     |               |
|---|---|---------------------|---------------|
|   |   |                     |               |
|   |   |                     |               |
|   |   |                     |               |
|   |   |                     |               |
| T | G | MLL3                | stomach       |
| C | A | MLL3                | stomach       |
| A | G | MLL3                | urinary_tract |
| T | C | MLL3                | stomach       |
|   |   |                     |               |
|   |   |                     |               |
| C | T | MLL3_ENST0000035519 | breast        |
|   |   |                     |               |
|   |   |                     |               |
|   |   |                     |               |
|   |   |                     |               |
|   |   |                     |               |
|   |   |                     |               |
|   |   |                     |               |
|   |   |                     |               |
| A | G | RAD21               | stomach       |
|   |   |                     |               |
|   |   |                     |               |
|   |   |                     |               |
|   |   |                     |               |
| C | T | EPPK1               | breast        |
|   |   |                     |               |
|   |   |                     |               |
|   |   |                     |               |
|   |   |                     |               |
| T | C | EPPK1               | breast        |
| C | T | EPPK1               | breast        |
| G | A | EPPK1               | breast        |
|   |   |                     |               |
| C | G | CDKN2A              | oesophagus    |
|   |   |                     |               |

|   |   |                     |                      |
|---|---|---------------------|----------------------|
|   |   |                     |                      |
|   |   |                     |                      |
|   |   |                     |                      |
| G | A | NOTCH1_ENST00000277 | large_intestine,lung |
|   |   |                     |                      |
|   |   |                     |                      |
|   |   |                     |                      |
|   |   |                     |                      |
|   |   |                     |                      |
|   |   |                     |                      |
|   |   |                     |                      |
|   |   |                     |                      |
| G | A | FGFR2_ENST000003575 | stomach              |
|   |   |                     |                      |
|   |   |                     |                      |
|   |   |                     |                      |
|   |   |                     |                      |
|   |   |                     |                      |
|   |   |                     |                      |
| G | A | CCND1_ENST000002275 | prostate             |
|   |   |                     |                      |
|   |   |                     |                      |
| C | T | ATM_ENST00000278616 | large_intestine      |
|   |   |                     |                      |
|   |   |                     |                      |
|   |   |                     |                      |
|   |   |                     |                      |
|   |   |                     |                      |
|   |   |                     |                      |
|   |   |                     |                      |
|   |   |                     |                      |
|   |   |                     |                      |
