# Supplementary material for: Circulating tumour cells from patients with colorectal cancer have cancer stem cell hallmarks in ex vivo culture
Source: PubMed Central journal article supplement — Gut. 2016 Jul 25;66(10):1802–10. doi: 10.1136/gutjnl-2016-311447 (PMC5595103; doi:10.1136/gutjnl-2016-311447), 2016-07-25
Supplement: gutjnl-2016-311447supp004.pdf [file gutjnl-2016-311447supp004.pdf]

Supplementary table 1: KEGG pathways found to be significantly up-regulated by GAGE.

| Pathway                                      | FDR    | SetSize | DECount | DEUp | DEDown |
|----------------------------------------------|--------|---------|---------|------|--------|
| Metabolism of xenobiotics by cytochrome P450 | 0.0066 | 70      | 24      | 21   | 3      |
| Steroid hormone biosynthesis                 | 0.0066 | 55      | 19      | 18   | 1      |
| Ribosome                                     | 0.0099 | 88      | 39      | 38   | 1      |
| Drug metabolism - cytochrome P450            | 0.0099 | 73      | 20      | 18   | 2      |
| Drug metabolism - other enzymes              | 0.0473 | 52      | 14      | 12   | 2      |
| Ascorbate and aldarate metabolism            | 0.0473 | 25      | 9       | 9    | 0      |
| Oxidative phosphorylation                    | 0.0473 | 116     | 40      | 34   | 6      |
