# Supplementary material for: Circulating tumour cells from patients with colorectal cancer have cancer stem cell hallmarks in ex vivo culture
Source: PubMed Central journal article supplement — Gut. 2016 Jul 25;66(10):1802–10. doi: 10.1136/gutjnl-2016-311447 (PMC5595103; doi:10.1136/gutjnl-2016-311447), 2016-07-25
Supplement: gutjnl-2016-311447supp005.pdf [file gutjnl-2016-311447supp005.pdf]

Grillet et al., Supplementary Table 5

| Chromosome | Position  | Ref | CPP | CTC | Category                             |
|------------|-----------|-----|-----|-----|--------------------------------------|
| chr1       | 2458010   | G   | G   | C   | Homozygous variant CPP NOT equal CTC |
| chr1       | 19566881  | C   | C   | T   | Homozygous variant CPP NOT equal CTC |
| chr1       | 68603586  | C   | T   | C   | Homozygous variant CPP NOT equal CTC |
| chr1       | 68624878  | C   | C   | T   | Homozygous variant CPP NOT equal CTC |
| chr1       | 146649854 | C   | C   | T   | Homozygous variant CPP NOT equal CTC |
| chr1       | 146650916 | C   | C   | T   | Homozygous variant CPP NOT equal CTC |
| chr1       | 226019633 | T   | T   | C   | Homozygous variant CPP NOT equal CTC |
| chr10      | 71103597  | C   | G   | C   | Homozygous variant CPP NOT equal CTC |
| chr10      | 72179746  | C   | C   | T   | Homozygous variant CPP NOT equal CTC |
| chr10      | 114200355 | G   | A   | G   | Homozygous variant CPP NOT equal CTC |
| chr10      | 129899578 | T   | T   | C   | Homozygous variant CPP NOT equal CTC |
| chr10      | 129899778 | G   | G   | C   | Homozygous variant CPP NOT equal CTC |
| chr10      | 129901393 | T   | T   | C   | Homozygous variant CPP NOT equal CTC |
| chr10      | 129901722 | G   | G   | A   | Homozygous variant CPP NOT equal CTC |
| chr10      | 129901726 | C   | C   | T   | Homozygous variant CPP NOT equal CTC |
| chr10      | 129901825 | T   | T   | C   | Homozygous variant CPP NOT equal CTC |
| chr10      | 129901946 | T   | T   | G   | Homozygous variant CPP NOT equal CTC |
| chr10      | 129902158 | C   | C   | T   | Homozygous variant CPP NOT equal CTC |
| chr10      | 129902281 | G   | G   | A   | Homozygous variant CPP NOT equal CTC |
| chr10      | 129903016 | T   | T   | C   | Homozygous variant CPP NOT equal CTC |
| chr10      | 129904477 | C   | C   | T   | Homozygous variant CPP NOT equal CTC |
| chr10      | 129906468 | C   | C   | T   | Homozygous variant CPP NOT equal CTC |
| chr10      | 129907544 | G   | G   | C   | Homozygous variant CPP NOT equal CTC |
| chr11      | 396915    | C   | C   | T   | Homozygous variant CPP NOT equal CTC |
| chr11      | 400109    | A   | A   | G   | Homozygous variant CPP NOT equal CTC |
| chr11      | 403980    | G   | G   | A   | Homozygous variant CPP NOT equal CTC |
| chr11      | 404317    | C   | C   | T   | Homozygous variant CPP NOT equal CTC |
| chr11      | 406043    | G   | G   | A   | Homozygous variant CPP NOT equal CTC |
| chr11      | 406473    | A   | A   | C   | Homozygous variant CPP NOT equal CTC |
| chr11      | 406483    | T   | T   | C   | Homozygous variant CPP NOT equal CTC |
| chr11      | 6631016   | C   | C   | T   | Homozygous variant CPP NOT equal CTC |
| chr11      | 17351683  | C   | C   | G   | Homozygous variant CPP NOT equal CTC |
| chr11      | 17515833  | A   | G   | A   | Homozygous variant CPP NOT equal CTC |
| chr11      | 43702530  | A   | A   | G   | Homozygous variant CPP NOT equal CTC |
| chr11      | 44636839  | C   | T   | C   | Homozygous variant CPP NOT equal CTC |
| chr11      | 44640640  | C   | G   | C   | Homozygous variant CPP NOT equal CTC |
| chr11      | 60666341  | G   | G   | A   | Homozygous variant CPP NOT equal CTC |
| chr11      | 60673868  | T   | T   | C   | Homozygous variant CPP NOT equal CTC |
| chr11      | 60701136  | C   | C   | G   | Homozygous variant CPP NOT equal CTC |
| chr11      | 60704213  | C   | C   | T   | Homozygous variant CPP NOT equal CTC |
| chr11      | 73689104  | G   | A   | G   | Homozygous variant CPP NOT equal CTC |
| chr11      | 75277757  | C   | C   | G   | Homozygous variant CPP NOT equal CTC |
| chr11      | 75279846  | C   | C   | T   | Homozygous variant CPP NOT equal CTC |
| chr11      | 75282882  | G   | G   | A   | Homozygous variant CPP NOT equal CTC |
| chr11      | 82564294  | T   | T   | G   | Homozygous variant CPP NOT equal CTC |

Grillet et al., Supplementary Table 5

|       |           |   |   |   |                                      |
|-------|-----------|---|---|---|--------------------------------------|
| chr11 | 130029880 | G | A | G | Homozygous variant CPP NOT equal CTC |
| chr11 | 130068491 | G | C | G | Homozygous variant CPP NOT equal CTC |
| chr12 | 64803798  | A | C | A | Homozygous variant CPP NOT equal CTC |
| chr12 | 88440676  | G | G | C | Homozygous variant CPP NOT equal CTC |
| chr12 | 89744773  | A | C | A | Homozygous variant CPP NOT equal CTC |
| chr12 | 121017171 | A | G | A | Homozygous variant CPP NOT equal CTC |
| chr12 | 132406666 | G | G | C | Homozygous variant CPP NOT equal CTC |
| chr13 | 39586343  | G | G | C | Homozygous variant CPP NOT equal CTC |
| chr13 | 39587166  | A | A | G | Homozygous variant CPP NOT equal CTC |
| chr13 | 39587677  | A | A | G | Homozygous variant CPP NOT equal CTC |
| chr13 | 39587865  | A | A | C | Homozygous variant CPP NOT equal CTC |
| chr13 | 39587889  | T | T | C | Homozygous variant CPP NOT equal CTC |
| chr13 | 46541673  | T | A | T | Homozygous variant CPP NOT equal CTC |
| chr13 | 46562935  | A | G | A | Homozygous variant CPP NOT equal CTC |
| chr14 | 35761675  | C | C | G | Homozygous variant CPP NOT equal CTC |
| chr14 | 35871217  | G | A | G | Homozygous variant CPP NOT equal CTC |
| chr14 | 105344293 | C | C | T | Homozygous variant CPP NOT equal CTC |
| chr15 | 40488851  | G | A | G | Homozygous variant CPP NOT equal CTC |
| chr15 | 43724646  | T | G | T | Homozygous variant CPP NOT equal CTC |
| chr15 | 63351840  | C | A | C | Homozygous variant CPP NOT equal CTC |
| chr15 | 102192540 | T | G | T | Homozygous variant CPP NOT equal CTC |
| chr16 | 103923    | C | G | C | Homozygous variant CPP NOT equal CTC |
| chr16 | 396264    | A | G | A | Homozygous variant CPP NOT equal CTC |
| chr16 | 1820992   | T | A | T | Homozygous variant CPP NOT equal CTC |
| chr16 | 1823024   | G | G | T | Homozygous variant CPP NOT equal CTC |
| chr16 | 1838037   | C | C | G | Homozygous variant CPP NOT equal CTC |
| chr16 | 1877698   | C | C | G | Homozygous variant CPP NOT equal CTC |
| chr16 | 14742400  | T | T | G | Homozygous variant CPP NOT equal CTC |
| chr16 | 31121793  | G | G | A | Homozygous variant CPP NOT equal CTC |
| chr16 | 31195279  | C | C | T | Homozygous variant CPP NOT equal CTC |
| chr16 | 57771126  | G | G | T | Homozygous variant CPP NOT equal CTC |
| chr16 | 72130203  | C | G | C | Homozygous variant CPP NOT equal CTC |
| chr16 | 88713236  | A | G | A | Homozygous variant CPP NOT equal CTC |
| chr17 | 1359363   | T | G | T | Homozygous variant CPP NOT equal CTC |
| chr17 | 1373518   | T | C | T | Homozygous variant CPP NOT equal CTC |
| chr17 | 1373612   | C | T | C | Homozygous variant CPP NOT equal CTC |
| chr17 | 2227655   | G | G | T | Homozygous variant CPP NOT equal CTC |
| chr17 | 4799022   | C | C | T | Homozygous variant CPP NOT equal CTC |
| chr17 | 5271679   | C | C | T | Homozygous variant CPP NOT equal CTC |
| chr17 | 7163739   | A | G | A | Homozygous variant CPP NOT equal CTC |
| chr17 | 7760704   | A | A | G | Homozygous variant CPP NOT equal CTC |
| chr17 | 8108331   | A | G | A | Homozygous variant CPP NOT equal CTC |
| chr17 | 17425631  | C | T | C | Homozygous variant CPP NOT equal CTC |
| chr17 | 34893326  | A | G | A | Homozygous variant CPP NOT equal CTC |
| chr17 | 38600092  | G | A | G | Homozygous variant CPP NOT equal CTC |
| chr17 | 73750859  | C | C | G | Homozygous variant CPP NOT equal CTC |

Grillet et al., Supplementary Table 5

|       |           |   |   |   |                                      |
|-------|-----------|---|---|---|--------------------------------------|
| chr17 | 73753503  | T | T | C | Homozygous variant CPP NOT equal CTC |
| chr17 | 78113832  | G | G | A | Homozygous variant CPP NOT equal CTC |
| chr18 | 12984144  | C | A | C | Homozygous variant CPP NOT equal CTC |
| chr18 | 29125854  | A | A | G | Homozygous variant CPP NOT equal CTC |
| chr18 | 47812587  | C | C | T | Homozygous variant CPP NOT equal CTC |
| chr19 | 282753    | G | G | A | Homozygous variant CPP NOT equal CTC |
| chr19 | 580665    | T | T | C | Homozygous variant CPP NOT equal CTC |
| chr19 | 991968    | T | T | C | Homozygous variant CPP NOT equal CTC |
| chr19 | 1106615   | T | C | T | Homozygous variant CPP NOT equal CTC |
| chr19 | 1122147   | G | A | G | Homozygous variant CPP NOT equal CTC |
| chr19 | 2226772   | G | C | G | Homozygous variant CPP NOT equal CTC |
| chr19 | 4013322   | T | T | C | Homozygous variant CPP NOT equal CTC |
| chr19 | 4910924   | C | C | T | Homozygous variant CPP NOT equal CTC |
| chr19 | 8468337   | C | C | T | Homozygous variant CPP NOT equal CTC |
| chr19 | 10672493  | C | C | T | Homozygous variant CPP NOT equal CTC |
| chr19 | 18288069  | A | A | G | Homozygous variant CPP NOT equal CTC |
| chr19 | 18305824  | C | C | T | Homozygous variant CPP NOT equal CTC |
| chr19 | 18679379  | C | G | C | Homozygous variant CPP NOT equal CTC |
| chr19 | 34868642  | A | A | G | Homozygous variant CPP NOT equal CTC |
| chr19 | 34959979  | A | G | A | Homozygous variant CPP NOT equal CTC |
| chr19 | 41211056  | T | T | C | Homozygous variant CPP NOT equal CTC |
| chr19 | 44055726  | T | C | T | Homozygous variant CPP NOT equal CTC |
| chr19 | 44057227  | T | C | T | Homozygous variant CPP NOT equal CTC |
| chr19 | 45909934  | G | A | G | Homozygous variant CPP NOT equal CTC |
| chr19 | 45912002  | A | C | A | Homozygous variant CPP NOT equal CTC |
| chr19 | 45912343  | A | G | A | Homozygous variant CPP NOT equal CTC |
| chr19 | 45912406  | G | A | G | Homozygous variant CPP NOT equal CTC |
| chr19 | 46327053  | C | C | T | Homozygous variant CPP NOT equal CTC |
| chr19 | 47770032  | C | C | T | Homozygous variant CPP NOT equal CTC |
| chr19 | 50909765  | C | C | T | Homozygous variant CPP NOT equal CTC |
| chr19 | 50986394  | G | G | A | Homozygous variant CPP NOT equal CTC |
| chr19 | 54966557  | G | G | C | Homozygous variant CPP NOT equal CTC |
| chr19 | 54972727  | C | C | T | Homozygous variant CPP NOT equal CTC |
| chr19 | 54972918  | T | T | C | Homozygous variant CPP NOT equal CTC |
| chr19 | 55614923  | T | T | C | Homozygous variant CPP NOT equal CTC |
| chr2  | 54886347  | G | A | G | Homozygous variant CPP NOT equal CTC |
| chr2  | 182780874 | C | C | T | Homozygous variant CPP NOT equal CTC |
| chr2  | 228398422 | A | A | G | Homozygous variant CPP NOT equal CTC |
| chr2  | 228416712 | A | G | A | Homozygous variant CPP NOT equal CTC |
| chr2  | 242179134 | G | G | A | Homozygous variant CPP NOT equal CTC |
| chr2  | 242192848 | T | T | C | Homozygous variant CPP NOT equal CTC |
| chr20 | 31024274  | T | T | C | Homozygous variant CPP NOT equal CTC |
| chr22 | 19121872  | G | G | A | Homozygous variant CPP NOT equal CTC |
| chr22 | 20940085  | G | G | A | Homozygous variant CPP NOT equal CTC |
| chr22 | 21984205  | A | G | A | Homozygous variant CPP NOT equal CTC |
| chr22 | 24964128  | T | T | C | Homozygous variant CPP NOT equal CTC |

Grillet et al., Supplementary Table 5

|       |           |   |   |   |                                      |
|-------|-----------|---|---|---|--------------------------------------|
| chr22 | 32795641  | C | T | C | Homozygous variant CPP NOT equal CTC |
| chr22 | 50354819  | C | A | C | Homozygous variant CPP NOT equal CTC |
| chr22 | 50943232  | G | A | G | Homozygous variant CPP NOT equal CTC |
| chr3  | 148727133 | G | G | A | Homozygous variant CPP NOT equal CTC |
| chr4  | 77055474  | A | G | A | Homozygous variant CPP NOT equal CTC |
| chr4  | 77057501  | A | G | A | Homozygous variant CPP NOT equal CTC |
| chr4  | 77065580  | T | C | T | Homozygous variant CPP NOT equal CTC |
| chr4  | 95561459  | A | G | A | Homozygous variant CPP NOT equal CTC |
| chr4  | 122617745 | G | G | A | Homozygous variant CPP NOT equal CTC |
| chr4  | 129012181 | G | A | G | Homozygous variant CPP NOT equal CTC |
| chr4  | 140587125 | A | A | T | Homozygous variant CPP NOT equal CTC |
| chr5  | 31423007  | T | T | C | Homozygous variant CPP NOT equal CTC |
| chr5  | 102345546 | A | A | C | Homozygous variant CPP NOT equal CTC |
| chr5  | 141014494 | T | T | C | Homozygous variant CPP NOT equal CTC |
| chr5  | 162909716 | C | C | T | Homozygous variant CPP NOT equal CTC |
| chr5  | 179498595 | C | T | C | Homozygous variant CPP NOT equal CTC |
| chr6  | 1313078   | G | G | A | Homozygous variant CPP NOT equal CTC |
| chr6  | 1313470   | C | C | T | Homozygous variant CPP NOT equal CTC |
| chr6  | 24418786  | T | T | C | Homozygous variant CPP NOT equal CTC |
| chr6  | 29910759  | T | T | C | Homozygous variant CPP NOT equal CTC |
| chr6  | 29910761  | G | G | A | Homozygous variant CPP NOT equal CTC |
| chr6  | 31237124  | T | T | C | Homozygous variant CPP NOT equal CTC |
| chr6  | 31237162  | C | C | G | Homozygous variant CPP NOT equal CTC |
| chr6  | 31237833  | T | T | C | Homozygous variant CPP NOT equal CTC |
| chr6  | 31238259  | G | G | T | Homozygous variant CPP NOT equal CTC |
| chr6  | 31239057  | C | C | T | Homozygous variant CPP NOT equal CTC |
| chr6  | 31239082  | G | G | C | Homozygous variant CPP NOT equal CTC |
| chr6  | 31239407  | G | G | T | Homozygous variant CPP NOT equal CTC |
| chr6  | 31239417  | C | C | T | Homozygous variant CPP NOT equal CTC |
| chr6  | 31239501  | G | G | T | Homozygous variant CPP NOT equal CTC |
| chr6  | 31239518  | C | C | T | Homozygous variant CPP NOT equal CTC |
| chr6  | 31239821  | G | G | T | Homozygous variant CPP NOT equal CTC |
| chr6  | 31239827  | C | C | T | Homozygous variant CPP NOT equal CTC |
| chr6  | 33179689  | C | C | T | Homozygous variant CPP NOT equal CTC |
| chr6  | 44081718  | G | A | G | Homozygous variant CPP NOT equal CTC |
| chr6  | 105776792 | G | G | A | Homozygous variant CPP NOT equal CTC |
| chr6  | 116600453 | C | C | T | Homozygous variant CPP NOT equal CTC |
| chr6  | 151686905 | C | T | C | Homozygous variant CPP NOT equal CTC |
| chr6  | 168352105 | G | G | A | Homozygous variant CPP NOT equal CTC |
| chr6  | 168366529 | G | G | C | Homozygous variant CPP NOT equal CTC |
| chr6  | 170862300 | G | C | G | Homozygous variant CPP NOT equal CTC |
| chr7  | 1538614   | G | G | A | Homozygous variant CPP NOT equal CTC |
| chr7  | 2394991   | C | C | T | Homozygous variant CPP NOT equal CTC |
| chr7  | 16816000  | T | T | C | Homozygous variant CPP NOT equal CTC |
| chr7  | 74489486  | T | T | C | Homozygous variant CPP NOT equal CTC |
| chr7  | 99693078  | G | G | A | Homozygous variant CPP NOT equal CTC |

Grillet et al., Supplementary Table 5

|      |           |   |   |   |                                      |
|------|-----------|---|---|---|--------------------------------------|
| chr7 | 99747130  | G | G | A | Homozygous variant CPP NOT equal CTC |
| chr7 | 107559722 | A | T | A | Homozygous variant CPP NOT equal CTC |
| chr7 | 107569517 | A | G | A | Homozygous variant CPP NOT equal CTC |
| chr7 | 112112279 | G | G | A | Homozygous variant CPP NOT equal CTC |
| chr8 | 11683622  | T | T | C | Homozygous variant CPP NOT equal CTC |
| chr8 | 19218766  | A | G | A | Homozygous variant CPP NOT equal CTC |
| chr8 | 22262321  | T | T | C | Homozygous variant CPP NOT equal CTC |
| chr8 | 22262418  | A | A | G | Homozygous variant CPP NOT equal CTC |
| chr8 | 22900701  | G | G | A | Homozygous variant CPP NOT equal CTC |
| chr8 | 23150878  | T | T | G | Homozygous variant CPP NOT equal CTC |
| chr8 | 26441477  | G | G | A | Homozygous variant CPP NOT equal CTC |
| chr8 | 144995494 | C | T | C | Homozygous variant CPP NOT equal CTC |
| chr8 | 144995736 | G | A | G | Homozygous variant CPP NOT equal CTC |
| chr8 | 144996029 | A | G | A | Homozygous variant CPP NOT equal CTC |
| chr8 | 144996408 | T | G | T | Homozygous variant CPP NOT equal CTC |
| chr8 | 144997656 | C | T | C | Homozygous variant CPP NOT equal CTC |
| chr8 | 144997927 | G | A | G | Homozygous variant CPP NOT equal CTC |
| chr8 | 144998169 | C | T | C | Homozygous variant CPP NOT equal CTC |
| chr8 | 144998190 | A | G | A | Homozygous variant CPP NOT equal CTC |
| chr8 | 144999417 | C | T | C | Homozygous variant CPP NOT equal CTC |
| chr8 | 144999621 | C | T | C | Homozygous variant CPP NOT equal CTC |
| chr8 | 144999642 | A | C | A | Homozygous variant CPP NOT equal CTC |
| chr8 | 144999684 | A | G | A | Homozygous variant CPP NOT equal CTC |
| chr8 | 145001031 | T | C | T | Homozygous variant CPP NOT equal CTC |
| chr8 | 145001588 | C | T | C | Homozygous variant CPP NOT equal CTC |
| chr8 | 145001784 | A | G | A | Homozygous variant CPP NOT equal CTC |
| chr9 | 75545882  | G | A | G | Homozygous variant CPP NOT equal CTC |
| chr9 | 130938661 | C | C | T | Homozygous variant CPP NOT equal CTC |
| chr9 | 132591509 | A | A | G | Homozygous variant CPP NOT equal CTC |
| chr9 | 132597021 | C | C | T | Homozygous variant CPP NOT equal CTC |
| chr9 | 134351343 | C | T | C | Homozygous variant CPP NOT equal CTC |
| chr9 | 139298593 | A | A | G | Homozygous variant CPP NOT equal CTC |
| chr1 | 887801    | A | G | G | Homozygous variant CPP equals CTC    |
| chr1 | 888639    | T | C | C | Homozygous variant CPP equals CTC    |
| chr1 | 888659    | T | C | C | Homozygous variant CPP equals CTC    |
| chr1 | 1247494   | T | C | C | Homozygous variant CPP equals CTC    |
| chr1 | 1249187   | G | A | A | Homozygous variant CPP equals CTC    |
| chr1 | 1254841   | C | G | G | Homozygous variant CPP equals CTC    |
| chr1 | 1277533   | T | C | C | Homozygous variant CPP equals CTC    |
| chr1 | 2126139   | C | G | G | Homozygous variant CPP equals CTC    |
| chr1 | 3383898   | A | G | G | Homozygous variant CPP equals CTC    |
| chr1 | 3389727   | C | T | T | Homozygous variant CPP equals CTC    |
| chr1 | 3807593   | G | C | C | Homozygous variant CPP equals CTC    |
| chr1 | 6704635   | A | G | G | Homozygous variant CPP equals CTC    |
| chr1 | 11119899  | T | C | C | Homozygous variant CPP equals CTC    |
| chr1 | 12907358  | T | C | C | Homozygous variant CPP equals CTC    |

Grillet et al., Supplementary Table 5

|      |           |   |   |   |                                   |
|------|-----------|---|---|---|-----------------------------------|
| chr1 | 16133912  | T | C | C | Homozygous variant CPP equals CTC |
| chr1 | 16133914  | T | C | C | Homozygous variant CPP equals CTC |
| chr1 | 17319011  | G | A | A | Homozygous variant CPP equals CTC |
| chr1 | 17380497  | G | T | T | Homozygous variant CPP equals CTC |
| chr1 | 19934617  | G | C | C | Homozygous variant CPP equals CTC |
| chr1 | 19934742  | G | T | T | Homozygous variant CPP equals CTC |
| chr1 | 19934893  | C | A | A | Homozygous variant CPP equals CTC |
| chr1 | 19934930  | T | C | C | Homozygous variant CPP equals CTC |
| chr1 | 19934989  | A | C | C | Homozygous variant CPP equals CTC |
| chr1 | 19935000  | C | T | T | Homozygous variant CPP equals CTC |
| chr1 | 20987873  | G | C | C | Homozygous variant CPP equals CTC |
| chr1 | 21167404  | A | G | G | Homozygous variant CPP equals CTC |
| chr1 | 26879920  | T | C | C | Homozygous variant CPP equals CTC |
| chr1 | 28422441  | C | T | T | Homozygous variant CPP equals CTC |
| chr1 | 28422847  | C | T | T | Homozygous variant CPP equals CTC |
| chr1 | 28422908  | T | C | C | Homozygous variant CPP equals CTC |
| chr1 | 29063559  | A | C | C | Homozygous variant CPP equals CTC |
| chr1 | 33133968  | T | C | C | Homozygous variant CPP equals CTC |
| chr1 | 38423853  | G | C | C | Homozygous variant CPP equals CTC |
| chr1 | 40533266  | T | G | G | Homozygous variant CPP equals CTC |
| chr1 | 40533287  | T | G | G | Homozygous variant CPP equals CTC |
| chr1 | 40533326  | T | G | G | Homozygous variant CPP equals CTC |
| chr1 | 40533347  | T | G | G | Homozygous variant CPP equals CTC |
| chr1 | 45981323  | T | G | G | Homozygous variant CPP equals CTC |
| chr1 | 46070690  | T | A | A | Homozygous variant CPP equals CTC |
| chr1 | 47842431  | G | A | A | Homozygous variant CPP equals CTC |
| chr1 | 55319902  | A | G | G | Homozygous variant CPP equals CTC |
| chr1 | 55523033  | A | G | G | Homozygous variant CPP equals CTC |
| chr1 | 89322982  | G | A | A | Homozygous variant CPP equals CTC |
| chr1 | 89448729  | C | T | T | Homozygous variant CPP equals CTC |
| chr1 | 89449390  | T | C | C | Homozygous variant CPP equals CTC |
| chr1 | 92108366  | C | T | T | Homozygous variant CPP equals CTC |
| chr1 | 92108367  | A | G | G | Homozygous variant CPP equals CTC |
| chr1 | 92108522  | G | A | A | Homozygous variant CPP equals CTC |
| chr1 | 92108528  | T | C | C | Homozygous variant CPP equals CTC |
| chr1 | 92108581  | T | G | G | Homozygous variant CPP equals CTC |
| chr1 | 92108582  | T | C | C | Homozygous variant CPP equals CTC |
| chr1 | 92108634  | T | C | C | Homozygous variant CPP equals CTC |
| chr1 | 92108642  | T | G | G | Homozygous variant CPP equals CTC |
| chr1 | 92108892  | C | T | T | Homozygous variant CPP equals CTC |
| chr1 | 92109128  | A | G | G | Homozygous variant CPP equals CTC |
| chr1 | 92109134  | G | A | A | Homozygous variant CPP equals CTC |
| chr1 | 92109261  | G | A | A | Homozygous variant CPP equals CTC |
| chr1 | 92109275  | A | G | G | Homozygous variant CPP equals CTC |
| chr1 | 109884775 | T | G | G | Homozygous variant CPP equals CTC |
| chr1 | 109897103 | A | G | G | Homozygous variant CPP equals CTC |

Grillet et al., Supplementary Table 5

|      |           |   |   |   |                                   |
|------|-----------|---|---|---|-----------------------------------|
| chr1 | 145103947 | T | C | C | Homozygous variant CPP equals CTC |
| chr1 | 145109549 | G | T | T | Homozygous variant CPP equals CTC |
| chr1 | 145109583 | C | A | A | Homozygous variant CPP equals CTC |
| chr1 | 145112414 | T | C | C | Homozygous variant CPP equals CTC |
| chr1 | 145112428 | C | T | T | Homozygous variant CPP equals CTC |
| chr1 | 145112485 | C | T | T | Homozygous variant CPP equals CTC |
| chr1 | 145115810 | A | G | G | Homozygous variant CPP equals CTC |
| chr1 | 146649884 | T | A | A | Homozygous variant CPP equals CTC |
| chr1 | 146649940 | C | T | T | Homozygous variant CPP equals CTC |
| chr1 | 146650074 | C | T | T | Homozygous variant CPP equals CTC |
| chr1 | 146650091 | C | A | A | Homozygous variant CPP equals CTC |
| chr1 | 146650190 | A | G | G | Homozygous variant CPP equals CTC |
| chr1 | 146650289 | C | T | T | Homozygous variant CPP equals CTC |
| chr1 | 146650295 | T | G | G | Homozygous variant CPP equals CTC |
| chr1 | 146650337 | G | T | T | Homozygous variant CPP equals CTC |
| chr1 | 146650508 | T | C | C | Homozygous variant CPP equals CTC |
| chr1 | 146650715 | T | G | G | Homozygous variant CPP equals CTC |
| chr1 | 146650733 | T | G | G | Homozygous variant CPP equals CTC |
| chr1 | 146650972 | T | C | C | Homozygous variant CPP equals CTC |
| chr1 | 146650973 | G | A | A | Homozygous variant CPP equals CTC |
| chr1 | 146751782 | A | C | C | Homozygous variant CPP equals CTC |
| chr1 | 146767149 | G | T | T | Homozygous variant CPP equals CTC |
| chr1 | 150938616 | G | A | A | Homozygous variant CPP equals CTC |
| chr1 | 151288391 | A | G | G | Homozygous variant CPP equals CTC |
| chr1 | 154574820 | T | C | C | Homozygous variant CPP equals CTC |
| chr1 | 154575040 | C | T | T | Homozygous variant CPP equals CTC |
| chr1 | 154600372 | A | G | G | Homozygous variant CPP equals CTC |
| chr1 | 155026942 | A | C | C | Homozygous variant CPP equals CTC |
| chr1 | 156561651 | G | C | C | Homozygous variant CPP equals CTC |
| chr1 | 156563726 | A | C | C | Homozygous variant CPP equals CTC |
| chr1 | 156563813 | G | A | A | Homozygous variant CPP equals CTC |
| chr1 | 156563852 | C | T | T | Homozygous variant CPP equals CTC |
| chr1 | 156564922 | C | T | T | Homozygous variant CPP equals CTC |
| chr1 | 156713512 | C | T | T | Homozygous variant CPP equals CTC |
| chr1 | 167906239 | A | C | C | Homozygous variant CPP equals CTC |
| chr1 | 182850727 | T | C | C | Homozygous variant CPP equals CTC |
| chr1 | 183486859 | G | A | A | Homozygous variant CPP equals CTC |
| chr1 | 201970562 | T | C | C | Homozygous variant CPP equals CTC |
| chr1 | 202733238 | C | T | T | Homozygous variant CPP equals CTC |
| chr1 | 204379617 | T | C | C | Homozygous variant CPP equals CTC |
| chr1 | 206773659 | A | G | G | Homozygous variant CPP equals CTC |
| chr1 | 214492286 | G | A | A | Homozygous variant CPP equals CTC |
| chr1 | 215793834 | G | A | A | Homozygous variant CPP equals CTC |
| chr1 | 220197625 | G | T | T | Homozygous variant CPP equals CTC |
| chr1 | 222802006 | A | G | G | Homozygous variant CPP equals CTC |
| chr1 | 222802926 | C | T | T | Homozygous variant CPP equals CTC |

Grillet et al., Supplementary Table 5

|       |           |   |    |    |                                   |
|-------|-----------|---|----|----|-----------------------------------|
| chr1  | 223900408 | C | G  | G  | Homozygous variant CPP equals CTC |
| chr1  | 223934720 | G | A  | A  | Homozygous variant CPP equals CTC |
| chr1  | 226570840 | T | C  | C  | Homozygous variant CPP equals CTC |
| chr1  | 227182033 | G | A  | A  | Homozygous variant CPP equals CTC |
| chr1  | 234745009 | A | G  | G  | Homozygous variant CPP equals CTC |
| chr1  | 236721731 | T | C  | C  | Homozygous variant CPP equals CTC |
| chr1  | 245022145 | T | -T | -T | Homozygous variant CPP equals CTC |
| chr10 | 294953    | A | G  | G  | Homozygous variant CPP equals CTC |
| chr10 | 3143643   | A | C  | C  | Homozygous variant CPP equals CTC |
| chr10 | 3155620   | A | G  | G  | Homozygous variant CPP equals CTC |
| chr10 | 5495218   | T | C  | C  | Homozygous variant CPP equals CTC |
| chr10 | 27400861  | G | A  | A  | Homozygous variant CPP equals CTC |
| chr10 | 27827541  | A | G  | G  | Homozygous variant CPP equals CTC |
| chr10 | 33209266  | G | T  | T  | Homozygous variant CPP equals CTC |
| chr10 | 34688287  | G | A  | A  | Homozygous variant CPP equals CTC |
| chr10 | 70502288  | G | A  | A  | Homozygous variant CPP equals CTC |
| chr10 | 71142420  | G | A  | A  | Homozygous variant CPP equals CTC |
| chr10 | 71876382  | C | T  | T  | Homozygous variant CPP equals CTC |
| chr10 | 72643671  | C | T  | T  | Homozygous variant CPP equals CTC |
| chr10 | 79795105  | T | A  | A  | Homozygous variant CPP equals CTC |
| chr10 | 81272731  | C | G  | G  | Homozygous variant CPP equals CTC |
| chr10 | 88203068  | T | C  | C  | Homozygous variant CPP equals CTC |
| chr10 | 95262981  | A | G  | G  | Homozygous variant CPP equals CTC |
| chr10 | 95718709  | T | C  | C  | Homozygous variant CPP equals CTC |
| chr10 | 95718760  | G | A  | A  | Homozygous variant CPP equals CTC |
| chr10 | 95718790  | T | C  | C  | Homozygous variant CPP equals CTC |
| chr10 | 95718794  | A | T  | T  | Homozygous variant CPP equals CTC |
| chr10 | 95719031  | A | G  | G  | Homozygous variant CPP equals CTC |
| chr10 | 95719043  | A | G  | G  | Homozygous variant CPP equals CTC |
| chr10 | 95719390  | G | C  | C  | Homozygous variant CPP equals CTC |
| chr10 | 95719427  | T | C  | C  | Homozygous variant CPP equals CTC |
| chr10 | 95719436  | A | G  | G  | Homozygous variant CPP equals CTC |
| chr10 | 95719535  | T | G  | G  | Homozygous variant CPP equals CTC |
| chr10 | 95720674  | T | C  | C  | Homozygous variant CPP equals CTC |
| chr10 | 99160965  | A | G  | G  | Homozygous variant CPP equals CTC |
| chr10 | 112361870 | A | G  | G  | Homozygous variant CPP equals CTC |
| chr10 | 120828969 | A | G  | G  | Homozygous variant CPP equals CTC |
| chr10 | 120919246 | T | C  | C  | Homozygous variant CPP equals CTC |
| chr10 | 121436362 | A | G  | G  | Homozygous variant CPP equals CTC |
| chr10 | 135097434 | A | G  | G  | Homozygous variant CPP equals CTC |
| chr10 | 135098672 | G | A  | A  | Homozygous variant CPP equals CTC |
| chr10 | 135180430 | A | G  | G  | Homozygous variant CPP equals CTC |
| chr10 | 135233541 | A | G  | G  | Homozygous variant CPP equals CTC |
| chr11 | 824789    | T | C  | C  | Homozygous variant CPP equals CTC |
| chr11 | 830487    | C | T  | T  | Homozygous variant CPP equals CTC |
| chr11 | 830670    | G | T  | T  | Homozygous variant CPP equals CTC |



Grillet et al., Supplementary Table 5

|       |          |   |    |    |                                   |
|-------|----------|---|----|----|-----------------------------------|
| chr11 | 837582   | G | A  | A  | Homozygous variant CPP equals CTC |
| chr11 | 840477   | A | G  | G  | Homozygous variant CPP equals CTC |
| chr11 | 842412   | A | -A | -A | Homozygous variant CPP equals CTC |
| chr11 | 903070   | G | C  | C  | Homozygous variant CPP equals CTC |
| chr11 | 1491096  | G | A  | A  | Homozygous variant CPP equals CTC |
| chr11 | 1501670  | G | C  | C  | Homozygous variant CPP equals CTC |
| chr11 | 2424684  | A | C  | C  | Homozygous variant CPP equals CTC |
| chr11 | 4159466  | G | A  | A  | Homozygous variant CPP equals CTC |
| chr11 | 6622714  | G | A  | A  | Homozygous variant CPP equals CTC |
| chr11 | 9406349  | T | C  | C  | Homozygous variant CPP equals CTC |
| chr11 | 10822350 | C | T  | T  | Homozygous variant CPP equals CTC |
| chr11 | 11373587 | A | G  | G  | Homozygous variant CPP equals CTC |
| chr11 | 11373616 | C | T  | T  | Homozygous variant CPP equals CTC |
| chr11 | 11373713 | G | T  | T  | Homozygous variant CPP equals CTC |
| chr11 | 11373925 | A | C  | C  | Homozygous variant CPP equals CTC |
| chr11 | 11373960 | C | T  | T  | Homozygous variant CPP equals CTC |
| chr11 | 11374016 | T | A  | A  | Homozygous variant CPP equals CTC |
| chr11 | 17172133 | T | C  | C  | Homozygous variant CPP equals CTC |
| chr11 | 18210708 | A | G  | G  | Homozygous variant CPP equals CTC |
| chr11 | 20529886 | G | A  | A  | Homozygous variant CPP equals CTC |
| chr11 | 32956620 | A | G  | G  | Homozygous variant CPP equals CTC |
| chr11 | 34152939 | T | C  | C  | Homozygous variant CPP equals CTC |
| chr11 | 34154641 | C | T  | T  | Homozygous variant CPP equals CTC |
| chr11 | 35226155 | A | G  | G  | Homozygous variant CPP equals CTC |
| chr11 | 35229673 | T | C  | C  | Homozygous variant CPP equals CTC |
| chr11 | 43911365 | T | C  | C  | Homozygous variant CPP equals CTC |
| chr11 | 45937267 | C | T  | T  | Homozygous variant CPP equals CTC |
| chr11 | 46702920 | T | C  | C  | Homozygous variant CPP equals CTC |
| chr11 | 47188314 | T | C  | C  | Homozygous variant CPP equals CTC |
| chr11 | 47331116 | T | C  | C  | Homozygous variant CPP equals CTC |
| chr11 | 47834592 | G | A  | A  | Homozygous variant CPP equals CTC |
| chr11 | 47857253 | T | C  | C  | Homozygous variant CPP equals CTC |
| chr11 | 57571232 | C | T  | T  | Homozygous variant CPP equals CTC |
| chr11 | 61108974 | G | A  | A  | Homozygous variant CPP equals CTC |
| chr11 | 61906374 | T | C  | C  | Homozygous variant CPP equals CTC |
| chr11 | 64011441 | T | C  | C  | Homozygous variant CPP equals CTC |
| chr11 | 64012225 | G | C  | C  | Homozygous variant CPP equals CTC |
| chr11 | 64022459 | A | G  | G  | Homozygous variant CPP equals CTC |
| chr11 | 64085785 | A | G  | G  | Homozygous variant CPP equals CTC |
| chr11 | 64572018 | T | C  | C  | Homozygous variant CPP equals CTC |
| chr11 | 64572557 | A | G  | G  | Homozygous variant CPP equals CTC |
| chr11 | 64621856 | A | G  | G  | Homozygous variant CPP equals CTC |
| chr11 | 64622869 | G | C  | C  | Homozygous variant CPP equals CTC |
| chr11 | 64645871 | A | G  | G  | Homozygous variant CPP equals CTC |
| chr11 | 64809167 | A | G  | G  | Homozygous variant CPP equals CTC |
| chr11 | 64851454 | T | -T | -T | Homozygous variant CPP equals CTC |

Grillet et al., Supplementary Table 5

|       |           |   |    |    |                                   |
|-------|-----------|---|----|----|-----------------------------------|
| chr11 | 64880090  | G | C  | C  | Homozygous variant CPP equals CTC |
| chr11 | 65383896  | G | C  | C  | Homozygous variant CPP equals CTC |
| chr11 | 65385606  | A | G  | G  | Homozygous variant CPP equals CTC |
| chr11 | 66036165  | G | -G | -G | Homozygous variant CPP equals CTC |
| chr11 | 66036169  | G | C  | C  | Homozygous variant CPP equals CTC |
| chr11 | 66107674  | A | G  | G  | Homozygous variant CPP equals CTC |
| chr11 | 66995603  | T | C  | C  | Homozygous variant CPP equals CTC |
| chr11 | 67034266  | C | A  | A  | Homozygous variant CPP equals CTC |
| chr11 | 67257823  | C | A  | A  | Homozygous variant CPP equals CTC |
| chr11 | 67258391  | A | G  | G  | Homozygous variant CPP equals CTC |
| chr11 | 67957518  | A | T  | T  | Homozygous variant CPP equals CTC |
| chr11 | 68171013  | T | C  | C  | Homozygous variant CPP equals CTC |
| chr11 | 68549340  | A | G  | G  | Homozygous variant CPP equals CTC |
| chr11 | 77790653  | T | C  | C  | Homozygous variant CPP equals CTC |
| chr11 | 111896324 | C | T  | T  | Homozygous variant CPP equals CTC |
| chr11 | 111908162 | T | C  | C  | Homozygous variant CPP equals CTC |
| chr11 | 111916647 | G | A  | A  | Homozygous variant CPP equals CTC |
| chr11 | 119999191 | A | G  | G  | Homozygous variant CPP equals CTC |
| chr11 | 120099658 | A | G  | G  | Homozygous variant CPP equals CTC |
| chr11 | 125525195 | A | G  | G  | Homozygous variant CPP equals CTC |
| chr12 | 862989    | T | C  | C  | Homozygous variant CPP equals CTC |
| chr12 | 990912    | A | C  | C  | Homozygous variant CPP equals CTC |
| chr12 | 1017197   | C | T  | T  | Homozygous variant CPP equals CTC |
| chr12 | 2968458   | T | C  | C  | Homozygous variant CPP equals CTC |
| chr12 | 10658531  | G | A  | A  | Homozygous variant CPP equals CTC |
| chr12 | 10658543  | C | T  | T  | Homozygous variant CPP equals CTC |
| chr12 | 10658630  | T | C  | C  | Homozygous variant CPP equals CTC |
| chr12 | 10658769  | C | A  | A  | Homozygous variant CPP equals CTC |
| chr12 | 10658771  | A | G  | G  | Homozygous variant CPP equals CTC |
| chr12 | 10658858  | A | G  | G  | Homozygous variant CPP equals CTC |
| chr12 | 10658875  | G | A  | A  | Homozygous variant CPP equals CTC |
| chr12 | 10659014  | T | G  | G  | Homozygous variant CPP equals CTC |
| chr12 | 10659128  | G | A  | A  | Homozygous variant CPP equals CTC |
| chr12 | 10659382  | C | T  | T  | Homozygous variant CPP equals CTC |
| chr12 | 17142052  | A | C  | C  | Homozygous variant CPP equals CTC |
| chr12 | 17142088  | G | A  | A  | Homozygous variant CPP equals CTC |
| chr12 | 17142168  | A | G  | G  | Homozygous variant CPP equals CTC |
| chr12 | 17142335  | T | C  | C  | Homozygous variant CPP equals CTC |
| chr12 | 21797029  | A | G  | G  | Homozygous variant CPP equals CTC |
| chr12 | 27470866  | G | A  | A  | Homozygous variant CPP equals CTC |
| chr12 | 31944789  | C | G  | G  | Homozygous variant CPP equals CTC |
| chr12 | 31944836  | C | T  | T  | Homozygous variant CPP equals CTC |
| chr12 | 31944972  | A | G  | G  | Homozygous variant CPP equals CTC |
| chr12 | 31944994  | A | T  | T  | Homozygous variant CPP equals CTC |
| chr12 | 31945071  | T | C  | C  | Homozygous variant CPP equals CTC |
| chr12 | 48866618  | T | C  | C  | Homozygous variant CPP equals CTC |

Grillet et al., Supplementary Table 5

|       |           |   |    |    |                                   |
|-------|-----------|---|----|----|-----------------------------------|
| chr12 | 48866627  | G | A  | A  | Homozygous variant CPP equals CTC |
| chr12 | 49297531  | A | T  | T  | Homozygous variant CPP equals CTC |
| chr12 | 49297546  | A | G  | G  | Homozygous variant CPP equals CTC |
| chr12 | 49334762  | G | C  | C  | Homozygous variant CPP equals CTC |
| chr12 | 49667103  | A | T  | T  | Homozygous variant CPP equals CTC |
| chr12 | 53693532  | A | G  | G  | Homozygous variant CPP equals CTC |
| chr12 | 53693533  | A | C  | C  | Homozygous variant CPP equals CTC |
| chr12 | 53703021  | G | A  | A  | Homozygous variant CPP equals CTC |
| chr12 | 56295734  | A | G  | G  | Homozygous variant CPP equals CTC |
| chr12 | 57994743  | T | G  | G  | Homozygous variant CPP equals CTC |
| chr12 | 69981788  | T | -T | -T | Homozygous variant CPP equals CTC |
| chr12 | 88178134  | T | C  | C  | Homozygous variant CPP equals CTC |
| chr12 | 89743223  | G | A  | A  | Homozygous variant CPP equals CTC |
| chr12 | 95228194  | G | C  | C  | Homozygous variant CPP equals CTC |
| chr12 | 95228202  | G | C  | C  | Homozygous variant CPP equals CTC |
| chr12 | 95228244  | G | T  | T  | Homozygous variant CPP equals CTC |
| chr12 | 104340476 | T | A  | A  | Homozygous variant CPP equals CTC |
| chr12 | 117013777 | G | C  | C  | Homozygous variant CPP equals CTC |
| chr12 | 120575549 | A | C  | C  | Homozygous variant CPP equals CTC |
| chr12 | 120661977 | T | C  | C  | Homozygous variant CPP equals CTC |
| chr12 | 122326812 | T | C  | C  | Homozygous variant CPP equals CTC |
| chr12 | 124069213 | T | C  | C  | Homozygous variant CPP equals CTC |
| chr12 | 124856660 | T | A  | A  | Homozygous variant CPP equals CTC |
| chr12 | 125397750 | A | G  | G  | Homozygous variant CPP equals CTC |
| chr12 | 131356673 | T | -T | -T | Homozygous variant CPP equals CTC |
| chr12 | 131356675 | T | A  | A  | Homozygous variant CPP equals CTC |
| chr13 | 25670717  | G | A  | A  | Homozygous variant CPP equals CTC |
| chr13 | 25670723  | C | G  | G  | Homozygous variant CPP equals CTC |
| chr13 | 25670851  | A | G  | G  | Homozygous variant CPP equals CTC |
| chr13 | 25670984  | C | T  | T  | Homozygous variant CPP equals CTC |
| chr13 | 25671080  | A | G  | G  | Homozygous variant CPP equals CTC |
| chr13 | 25671092  | T | C  | C  | Homozygous variant CPP equals CTC |
| chr13 | 25671188  | G | A  | A  | Homozygous variant CPP equals CTC |
| chr13 | 25671214  | T | G  | G  | Homozygous variant CPP equals CTC |
| chr13 | 25671274  | C | A  | A  | Homozygous variant CPP equals CTC |
| chr13 | 25671320  | A | G  | G  | Homozygous variant CPP equals CTC |
| chr13 | 25671667  | A | T  | T  | Homozygous variant CPP equals CTC |
| chr13 | 25671672  | A | G  | G  | Homozygous variant CPP equals CTC |
| chr13 | 25671755  | G | A  | A  | Homozygous variant CPP equals CTC |
| chr13 | 25671786  | G | A  | A  | Homozygous variant CPP equals CTC |
| chr13 | 25672007  | A | G  | G  | Homozygous variant CPP equals CTC |
| chr13 | 25672104  | T | C  | C  | Homozygous variant CPP equals CTC |
| chr13 | 28009920  | G | C  | C  | Homozygous variant CPP equals CTC |
| chr13 | 28519461  | T | C  | C  | Homozygous variant CPP equals CTC |
| chr13 | 28519518  | A | G  | G  | Homozygous variant CPP equals CTC |
| chr13 | 28519521  | G | A  | A  | Homozygous variant CPP equals CTC |

Grillet et al., Supplementary Table 5

|       |           |   |   |   |                                   |
|-------|-----------|---|---|---|-----------------------------------|
| chr13 | 30091714  | G | A | A | Homozygous variant CPP equals CTC |
| chr13 | 30091819  | G | C | C | Homozygous variant CPP equals CTC |
| chr13 | 37678524  | G | A | A | Homozygous variant CPP equals CTC |
| chr13 | 37678797  | G | A | A | Homozygous variant CPP equals CTC |
| chr13 | 37678935  | C | T | T | Homozygous variant CPP equals CTC |
| chr13 | 47308109  | A | G | G | Homozygous variant CPP equals CTC |
| chr13 | 52603194  | G | T | T | Homozygous variant CPP equals CTC |
| chr13 | 53035783  | T | C | C | Homozygous variant CPP equals CTC |
| chr13 | 73301728  | T | C | C | Homozygous variant CPP equals CTC |
| chr13 | 75936519  | C | G | G | Homozygous variant CPP equals CTC |
| chr13 | 99112680  | C | T | T | Homozygous variant CPP equals CTC |
| chr13 | 103527849 | G | C | C | Homozygous variant CPP equals CTC |
| chr13 | 103527930 | G | C | C | Homozygous variant CPP equals CTC |
| chr13 | 111319754 | T | C | C | Homozygous variant CPP equals CTC |
| chr13 | 113951722 | C | T | T | Homozygous variant CPP equals CTC |
| chr13 | 113965176 | C | A | A | Homozygous variant CPP equals CTC |
| chr14 | 23236524  | C | T | T | Homozygous variant CPP equals CTC |
| chr14 | 23374435  | G | A | A | Homozygous variant CPP equals CTC |
| chr14 | 23374862  | C | T | T | Homozygous variant CPP equals CTC |
| chr14 | 23549379  | C | G | G | Homozygous variant CPP equals CTC |
| chr14 | 24567498  | A | C | C | Homozygous variant CPP equals CTC |
| chr14 | 35062312  | C | T | T | Homozygous variant CPP equals CTC |
| chr14 | 36789775  | A | T | T | Homozygous variant CPP equals CTC |
| chr14 | 36789795  | G | A | A | Homozygous variant CPP equals CTC |
| chr14 | 39650234  | A | T | T | Homozygous variant CPP equals CTC |
| chr14 | 60864578  | A | G | G | Homozygous variant CPP equals CTC |
| chr14 | 64882380  | A | G | G | Homozygous variant CPP equals CTC |
| chr14 | 77928525  | A | G | G | Homozygous variant CPP equals CTC |
| chr14 | 78174473  | A | C | C | Homozygous variant CPP equals CTC |
| chr14 | 103934488 | T | C | C | Homozygous variant CPP equals CTC |
| chr14 | 104029378 | C | G | G | Homozygous variant CPP equals CTC |
| chr14 | 105167807 | C | T | T | Homozygous variant CPP equals CTC |
| chr14 | 105179194 | T | C | C | Homozygous variant CPP equals CTC |
| chr14 | 105180565 | T | C | C | Homozygous variant CPP equals CTC |
| chr14 | 105350799 | C | T | T | Homozygous variant CPP equals CTC |
| chr14 | 105350868 | C | T | T | Homozygous variant CPP equals CTC |
| chr14 | 105916420 | C | T | T | Homozygous variant CPP equals CTC |
| chr14 | 105935824 | G | A | A | Homozygous variant CPP equals CTC |
| chr15 | 30008856  | C | A | A | Homozygous variant CPP equals CTC |
| chr15 | 40328575  | G | C | C | Homozygous variant CPP equals CTC |
| chr15 | 40328665  | G | A | A | Homozygous variant CPP equals CTC |
| chr15 | 40330564  | C | T | T | Homozygous variant CPP equals CTC |
| chr15 | 41148199  | C | T | T | Homozygous variant CPP equals CTC |
| chr15 | 41149161  | G | C | C | Homozygous variant CPP equals CTC |
| chr15 | 64385851  | T | C | C | Homozygous variant CPP equals CTC |
| chr15 | 64454358  | G | C | C | Homozygous variant CPP equals CTC |

Grillet et al., Supplementary Table 5

|       |           |   |    |    |                                   |
|-------|-----------|---|----|----|-----------------------------------|
| chr15 | 66644521  | C | G  | G  | Homozygous variant CPP equals CTC |
| chr15 | 68583175  | T | C  | C  | Homozygous variant CPP equals CTC |
| chr15 | 69728949  | A | G  | G  | Homozygous variant CPP equals CTC |
| chr15 | 69732736  | C | T  | T  | Homozygous variant CPP equals CTC |
| chr15 | 70991925  | G | C  | C  | Homozygous variant CPP equals CTC |
| chr15 | 71634009  | C | A  | A  | Homozygous variant CPP equals CTC |
| chr15 | 72637795  | T | C  | C  | Homozygous variant CPP equals CTC |
| chr15 | 72638892  | T | C  | C  | Homozygous variant CPP equals CTC |
| chr15 | 73067234  | T | C  | C  | Homozygous variant CPP equals CTC |
| chr15 | 75499619  | T | C  | C  | Homozygous variant CPP equals CTC |
| chr15 | 75499861  | G | A  | A  | Homozygous variant CPP equals CTC |
| chr15 | 77344793  | T | A  | A  | Homozygous variant CPP equals CTC |
| chr15 | 78758677  | G | C  | C  | Homozygous variant CPP equals CTC |
| chr15 | 78780104  | T | C  | C  | Homozygous variant CPP equals CTC |
| chr15 | 79606137  | G | A  | A  | Homozygous variant CPP equals CTC |
| chr15 | 79614418  | A | G  | G  | Homozygous variant CPP equals CTC |
| chr15 | 81212608  | G | A  | A  | Homozygous variant CPP equals CTC |
| chr15 | 85188994  | T | C  | C  | Homozygous variant CPP equals CTC |
| chr15 | 89450546  | C | T  | T  | Homozygous variant CPP equals CTC |
| chr15 | 89450587  | G | T  | T  | Homozygous variant CPP equals CTC |
| chr15 | 89838236  | G | A  | A  | Homozygous variant CPP equals CTC |
| chr15 | 91524841  | G | T  | T  | Homozygous variant CPP equals CTC |
| chr15 | 102192548 | A | C  | C  | Homozygous variant CPP equals CTC |
| chr16 | 103517    | A | C  | C  | Homozygous variant CPP equals CTC |
| chr16 | 839262    | A | G  | G  | Homozygous variant CPP equals CTC |
| chr16 | 2059674   | T | C  | C  | Homozygous variant CPP equals CTC |
| chr16 | 2812890   | A | G  | G  | Homozygous variant CPP equals CTC |
| chr16 | 2814162   | G | A  | A  | Homozygous variant CPP equals CTC |
| chr16 | 2815237   | A | C  | C  | Homozygous variant CPP equals CTC |
| chr16 | 2818161   | T | C  | C  | Homozygous variant CPP equals CTC |
| chr16 | 2818704   | T | G  | G  | Homozygous variant CPP equals CTC |
| chr16 | 2821989   | C | -C | -C | Homozygous variant CPP equals CTC |
| chr16 | 3534892   | G | A  | A  | Homozygous variant CPP equals CTC |
| chr16 | 3535540   | G | A  | A  | Homozygous variant CPP equals CTC |
| chr16 | 4861709   | G | C  | C  | Homozygous variant CPP equals CTC |
| chr16 | 8952248   | A | G  | G  | Homozygous variant CPP equals CTC |
| chr16 | 12009279  | A | G  | G  | Homozygous variant CPP equals CTC |
| chr16 | 23489711  | C | G  | G  | Homozygous variant CPP equals CTC |
| chr16 | 23536684  | T | C  | C  | Homozygous variant CPP equals CTC |
| chr16 | 28842311  | A | G  | G  | Homozygous variant CPP equals CTC |
| chr16 | 29708350  | A | G  | G  | Homozygous variant CPP equals CTC |
| chr16 | 29811319  | C | T  | T  | Homozygous variant CPP equals CTC |
| chr16 | 29814234  | G | A  | A  | Homozygous variant CPP equals CTC |
| chr16 | 29821744  | G | A  | A  | Homozygous variant CPP equals CTC |
| chr16 | 30078549  | A | -A | -A | Homozygous variant CPP equals CTC |
| chr16 | 30078550  | T | G  | G  | Homozygous variant CPP equals CTC |

Grillet et al., Supplementary Table 5

|       |          |   |   |   |                                   |
|-------|----------|---|---|---|-----------------------------------|
| chr16 | 30079963 | A | T | T | Homozygous variant CPP equals CTC |
| chr16 | 30080300 | G | A | A | Homozygous variant CPP equals CTC |
| chr16 | 30724070 | G | T | T | Homozygous variant CPP equals CTC |
| chr16 | 30734963 | C | A | A | Homozygous variant CPP equals CTC |
| chr16 | 30780828 | A | G | G | Homozygous variant CPP equals CTC |
| chr16 | 31191482 | A | G | G | Homozygous variant CPP equals CTC |
| chr16 | 31580383 | A | C | C | Homozygous variant CPP equals CTC |
| chr16 | 31580436 | T | C | C | Homozygous variant CPP equals CTC |
| chr16 | 31580470 | T | C | C | Homozygous variant CPP equals CTC |
| chr16 | 31580476 | G | C | C | Homozygous variant CPP equals CTC |
| chr16 | 31580589 | T | C | C | Homozygous variant CPP equals CTC |
| chr16 | 46696284 | G | A | A | Homozygous variant CPP equals CTC |
| chr16 | 56855496 | C | G | G | Homozygous variant CPP equals CTC |
| chr16 | 57499902 | T | C | C | Homozygous variant CPP equals CTC |
| chr16 | 57689883 | T | C | C | Homozygous variant CPP equals CTC |
| chr16 | 69970329 | A | G | G | Homozygous variant CPP equals CTC |
| chr16 | 70287177 | A | G | G | Homozygous variant CPP equals CTC |
| chr16 | 70548297 | G | A | A | Homozygous variant CPP equals CTC |
| chr16 | 75327916 | A | G | G | Homozygous variant CPP equals CTC |
| chr16 | 81050965 | A | T | T | Homozygous variant CPP equals CTC |
| chr16 | 85838653 | T | C | C | Homozygous variant CPP equals CTC |
| chr16 | 88717386 | T | C | C | Homozygous variant CPP equals CTC |
| chr16 | 88782676 | A | G | G | Homozygous variant CPP equals CTC |
| chr16 | 88783521 | T | C | C | Homozygous variant CPP equals CTC |
| chr16 | 88872145 | T | C | C | Homozygous variant CPP equals CTC |
| chr16 | 89350038 | G | A | A | Homozygous variant CPP equals CTC |
| chr16 | 89350178 | G | A | A | Homozygous variant CPP equals CTC |
| chr17 | 970413   | C | T | T | Homozygous variant CPP equals CTC |
| chr17 | 1384066  | A | G | G | Homozygous variant CPP equals CTC |
| chr17 | 4455500  | T | C | C | Homozygous variant CPP equals CTC |
| chr17 | 4575283  | A | G | G | Homozygous variant CPP equals CTC |
| chr17 | 7402600  | T | C | C | Homozygous variant CPP equals CTC |
| chr17 | 7404107  | T | C | C | Homozygous variant CPP equals CTC |
| chr17 | 7404991  | T | C | C | Homozygous variant CPP equals CTC |
| chr17 | 7416683  | A | G | G | Homozygous variant CPP equals CTC |
| chr17 | 7417086  | G | A | A | Homozygous variant CPP equals CTC |
| chr17 | 7477938  | G | C | C | Homozygous variant CPP equals CTC |
| chr17 | 17707105 | T | C | C | Homozygous variant CPP equals CTC |
| chr17 | 17997209 | G | A | A | Homozygous variant CPP equals CTC |
| chr17 | 20924523 | G | A | A | Homozygous variant CPP equals CTC |
| chr17 | 26684449 | G | C | C | Homozygous variant CPP equals CTC |
| chr17 | 33469279 | G | C | C | Homozygous variant CPP equals CTC |
| chr17 | 33478187 | A | G | G | Homozygous variant CPP equals CTC |
| chr17 | 33478229 | A | T | T | Homozygous variant CPP equals CTC |
| chr17 | 35478362 | T | C | C | Homozygous variant CPP equals CTC |
| chr17 | 36861983 | T | C | C | Homozygous variant CPP equals CTC |

Grillet et al., Supplementary Table 5

|       |          |   |    |    |                                   |
|-------|----------|---|----|----|-----------------------------------|
| chr17 | 38990834 | G | C  | C  | Homozygous variant CPP equals CTC |
| chr17 | 39925925 | A | G  | G  | Homozygous variant CPP equals CTC |
| chr17 | 39959189 | C | G  | G  | Homozygous variant CPP equals CTC |
| chr17 | 39987130 | T | C  | C  | Homozygous variant CPP equals CTC |
| chr17 | 40048613 | A | G  | G  | Homozygous variant CPP equals CTC |
| chr17 | 41116234 | G | A  | A  | Homozygous variant CPP equals CTC |
| chr17 | 45000547 | G | C  | C  | Homozygous variant CPP equals CTC |
| chr17 | 55607088 | A | T  | T  | Homozygous variant CPP equals CTC |
| chr17 | 59667899 | C | T  | T  | Homozygous variant CPP equals CTC |
| chr17 | 59667948 | A | G  | G  | Homozygous variant CPP equals CTC |
| chr17 | 59668005 | T | C  | C  | Homozygous variant CPP equals CTC |
| chr17 | 59668146 | A | G  | G  | Homozygous variant CPP equals CTC |
| chr17 | 59668157 | G | C  | C  | Homozygous variant CPP equals CTC |
| chr17 | 59668284 | T | C  | C  | Homozygous variant CPP equals CTC |
| chr17 | 59668285 | A | C  | C  | Homozygous variant CPP equals CTC |
| chr17 | 59668318 | C | T  | T  | Homozygous variant CPP equals CTC |
| chr17 | 59668349 | C | T  | T  | Homozygous variant CPP equals CTC |
| chr17 | 59668487 | A | G  | G  | Homozygous variant CPP equals CTC |
| chr17 | 59668536 | C | G  | G  | Homozygous variant CPP equals CTC |
| chr17 | 63533768 | G | A  | A  | Homozygous variant CPP equals CTC |
| chr17 | 63554591 | G | A  | A  | Homozygous variant CPP equals CTC |
| chr17 | 65988049 | T | C  | C  | Homozygous variant CPP equals CTC |
| chr17 | 66039350 | A | G  | G  | Homozygous variant CPP equals CTC |
| chr17 | 73127683 | T | C  | C  | Homozygous variant CPP equals CTC |
| chr17 | 73221439 | C | T  | T  | Homozygous variant CPP equals CTC |
| chr17 | 73230856 | C | T  | T  | Homozygous variant CPP equals CTC |
| chr17 | 73257986 | C | T  | T  | Homozygous variant CPP equals CTC |
| chr17 | 73518203 | G | C  | C  | Homozygous variant CPP equals CTC |
| chr17 | 73518284 | G | C  | C  | Homozygous variant CPP equals CTC |
| chr17 | 73753661 | C | T  | T  | Homozygous variant CPP equals CTC |
| chr17 | 74732507 | A | G  | G  | Homozygous variant CPP equals CTC |
| chr17 | 74733099 | G | A  | A  | Homozygous variant CPP equals CTC |
| chr17 | 75190846 | A | C  | C  | Homozygous variant CPP equals CTC |
| chr17 | 75494705 | A | G  | G  | Homozygous variant CPP equals CTC |
| chr17 | 76183516 | T | -T | -T | Homozygous variant CPP equals CTC |
| chr17 | 76219591 | G | A  | A  | Homozygous variant CPP equals CTC |
| chr17 | 76970879 | A | G  | G  | Homozygous variant CPP equals CTC |
| chr17 | 79589242 | G | A  | A  | Homozygous variant CPP equals CTC |
| chr17 | 79596811 | C | T  | T  | Homozygous variant CPP equals CTC |
| chr17 | 79637349 | T | C  | C  | Homozygous variant CPP equals CTC |
| chr17 | 79872241 | A | G  | G  | Homozygous variant CPP equals CTC |
| chr17 | 79891147 | T | C  | C  | Homozygous variant CPP equals CTC |
| chr18 | 252559   | G | A  | A  | Homozygous variant CPP equals CTC |
| chr18 | 724612   | A | G  | G  | Homozygous variant CPP equals CTC |
| chr18 | 9117867  | T | C  | C  | Homozygous variant CPP equals CTC |
| chr18 | 12057358 | T | C  | C  | Homozygous variant CPP equals CTC |

Grillet et al., Supplementary Table 5

|       |          |   |    |    |                                   |
|-------|----------|---|----|----|-----------------------------------|
| chr18 | 12718593 | A | G  | G  | Homozygous variant CPP equals CTC |
| chr18 | 32917644 | T | C  | C  | Homozygous variant CPP equals CTC |
| chr18 | 33647254 | A | C  | C  | Homozygous variant CPP equals CTC |
| chr18 | 33706614 | C | G  | G  | Homozygous variant CPP equals CTC |
| chr19 | 990281   | G | A  | A  | Homozygous variant CPP equals CTC |
| chr19 | 1036552  | T | C  | C  | Homozygous variant CPP equals CTC |
| chr19 | 1094004  | G | A  | A  | Homozygous variant CPP equals CTC |
| chr19 | 1272040  | T | C  | C  | Homozygous variant CPP equals CTC |
| chr19 | 1277275  | G | C  | C  | Homozygous variant CPP equals CTC |
| chr19 | 1388538  | C | T  | T  | Homozygous variant CPP equals CTC |
| chr19 | 2433890  | A | G  | G  | Homozygous variant CPP equals CTC |
| chr19 | 4847874  | A | G  | G  | Homozygous variant CPP equals CTC |
| chr19 | 4852106  | A | G  | G  | Homozygous variant CPP equals CTC |
| chr19 | 4859937  | T | C  | C  | Homozygous variant CPP equals CTC |
| chr19 | 6415443  | T | C  | C  | Homozygous variant CPP equals CTC |
| chr19 | 8527467  | T | G  | G  | Homozygous variant CPP equals CTC |
| chr19 | 8527469  | A | T  | T  | Homozygous variant CPP equals CTC |
| chr19 | 8551094  | T | C  | C  | Homozygous variant CPP equals CTC |
| chr19 | 8553630  | C | T  | T  | Homozygous variant CPP equals CTC |
| chr19 | 10265312 | T | C  | C  | Homozygous variant CPP equals CTC |
| chr19 | 10668452 | A | G  | G  | Homozygous variant CPP equals CTC |
| chr19 | 13051475 | T | G  | G  | Homozygous variant CPP equals CTC |
| chr19 | 14561722 | A | G  | G  | Homozygous variant CPP equals CTC |
| chr19 | 15508362 | G | C  | C  | Homozygous variant CPP equals CTC |
| chr19 | 16633950 | T | C  | C  | Homozygous variant CPP equals CTC |
| chr19 | 17330060 | T | C  | C  | Homozygous variant CPP equals CTC |
| chr19 | 18279638 | T | C  | C  | Homozygous variant CPP equals CTC |
| chr19 | 36727365 | G | A  | A  | Homozygous variant CPP equals CTC |
| chr19 | 39195662 | T | A  | A  | Homozygous variant CPP equals CTC |
| chr19 | 41811730 | T | C  | C  | Homozygous variant CPP equals CTC |
| chr19 | 41858921 | G | A  | A  | Homozygous variant CPP equals CTC |
| chr19 | 41903220 | G | A  | A  | Homozygous variant CPP equals CTC |
| chr19 | 42364841 | T | G  | G  | Homozygous variant CPP equals CTC |
| chr19 | 42736267 | A | G  | G  | Homozygous variant CPP equals CTC |
| chr19 | 45162038 | A | G  | G  | Homozygous variant CPP equals CTC |
| chr19 | 45476422 | T | C  | C  | Homozygous variant CPP equals CTC |
| chr19 | 45561063 | A | G  | G  | Homozygous variant CPP equals CTC |
| chr19 | 47177913 | A | G  | G  | Homozygous variant CPP equals CTC |
| chr19 | 47341807 | T | -T | -T | Homozygous variant CPP equals CTC |
| chr19 | 50154904 | A | C  | C  | Homozygous variant CPP equals CTC |
| chr19 | 50156896 | T | C  | C  | Homozygous variant CPP equals CTC |
| chr19 | 50383591 | A | G  | G  | Homozygous variant CPP equals CTC |
| chr19 | 52723119 | T | -T | -T | Homozygous variant CPP equals CTC |
| chr19 | 54649671 | T | C  | C  | Homozygous variant CPP equals CTC |
| chr19 | 54677759 | T | C  | C  | Homozygous variant CPP equals CTC |
| chr19 | 54966579 | C | G  | G  | Homozygous variant CPP equals CTC |



Grillet et al., Supplementary Table 5

|       |           |   |    |    |                                   |
|-------|-----------|---|----|----|-----------------------------------|
| chr19 | 56180968  | C | T  | T  | Homozygous variant CPP equals CTC |
| chr2  | 9491017   | C | T  | T  | Homozygous variant CPP equals CTC |
| chr2  | 10937822  | T | A  | A  | Homozygous variant CPP equals CTC |
| chr2  | 10937824  | A | -A | -A | Homozygous variant CPP equals CTC |
| chr2  | 20403794  | A | T  | T  | Homozygous variant CPP equals CTC |
| chr2  | 27428295  | A | G  | G  | Homozygous variant CPP equals CTC |
| chr2  | 27435250  | A | G  | G  | Homozygous variant CPP equals CTC |
| chr2  | 37456032  | C | T  | T  | Homozygous variant CPP equals CTC |
| chr2  | 42510018  | A | G  | G  | Homozygous variant CPP equals CTC |
| chr2  | 55490819  | G | T  | T  | Homozygous variant CPP equals CTC |
| chr2  | 86315741  | C | T  | T  | Homozygous variant CPP equals CTC |
| chr2  | 101898412 | G | C  | C  | Homozygous variant CPP equals CTC |
| chr2  | 105709023 | T | C  | C  | Homozygous variant CPP equals CTC |
| chr2  | 109389463 | G | A  | A  | Homozygous variant CPP equals CTC |
| chr2  | 132200806 | C | T  | T  | Homozygous variant CPP equals CTC |
| chr2  | 132201442 | A | G  | G  | Homozygous variant CPP equals CTC |
| chr2  | 132201573 | A | G  | G  | Homozygous variant CPP equals CTC |
| chr2  | 132201582 | A | G  | G  | Homozygous variant CPP equals CTC |
| chr2  | 150432976 | C | T  | T  | Homozygous variant CPP equals CTC |
| chr2  | 160605268 | T | C  | C  | Homozygous variant CPP equals CTC |
| chr2  | 170605981 | C | T  | T  | Homozygous variant CPP equals CTC |
| chr2  | 171822466 | C | T  | T  | Homozygous variant CPP equals CTC |
| chr2  | 183799558 | G | C  | C  | Homozygous variant CPP equals CTC |
| chr2  | 192250726 | G | A  | A  | Homozygous variant CPP equals CTC |
| chr2  | 192279327 | T | C  | C  | Homozygous variant CPP equals CTC |
| chr2  | 198353974 | A | G  | G  | Homozygous variant CPP equals CTC |
| chr2  | 219144815 | T | C  | C  | Homozygous variant CPP equals CTC |
| chr2  | 220037393 | A | G  | G  | Homozygous variant CPP equals CTC |
| chr2  | 220085845 | A | G  | G  | Homozygous variant CPP equals CTC |
| chr2  | 220404381 | A | G  | G  | Homozygous variant CPP equals CTC |
| chr2  | 220405321 | T | C  | C  | Homozygous variant CPP equals CTC |
| chr2  | 223436607 | C | T  | T  | Homozygous variant CPP equals CTC |
| chr2  | 241075637 | A | G  | G  | Homozygous variant CPP equals CTC |
| chr2  | 242203916 | A | C  | C  | Homozygous variant CPP equals CTC |
| chr2  | 242610773 | T | A  | A  | Homozygous variant CPP equals CTC |
| chr20 | 1099523   | T | G  | G  | Homozygous variant CPP equals CTC |
| chr20 | 2633936   | T | C  | C  | Homozygous variant CPP equals CTC |
| chr20 | 17605240  | A | T  | T  | Homozygous variant CPP equals CTC |
| chr20 | 17640009  | A | C  | C  | Homozygous variant CPP equals CTC |
| chr20 | 23618395  | T | C  | C  | Homozygous variant CPP equals CTC |
| chr20 | 25288632  | G | A  | A  | Homozygous variant CPP equals CTC |
| chr20 | 26188824  | T | C  | C  | Homozygous variant CPP equals CTC |
| chr20 | 26188912  | A | C  | C  | Homozygous variant CPP equals CTC |
| chr20 | 31022959  | T | C  | C  | Homozygous variant CPP equals CTC |
| chr20 | 33337751  | T | C  | C  | Homozygous variant CPP equals CTC |
| chr20 | 33657126  | G | A  | A  | Homozygous variant CPP equals CTC |

Grillet et al., Supplementary Table 5

|       |          |   |   |   |                                   |
|-------|----------|---|---|---|-----------------------------------|
| chr20 | 42225114 | G | A | A | Homozygous variant CPP equals CTC |
| chr20 | 42328639 | T | C | C | Homozygous variant CPP equals CTC |
| chr20 | 45853037 | A | G | G | Homozygous variant CPP equals CTC |
| chr20 | 47850182 | C | T | T | Homozygous variant CPP equals CTC |
| chr20 | 48257149 | C | T | T | Homozygous variant CPP equals CTC |
| chr20 | 48770159 | T | C | C | Homozygous variant CPP equals CTC |
| chr20 | 57572675 | A | G | G | Homozygous variant CPP equals CTC |
| chr20 | 57605356 | A | G | G | Homozygous variant CPP equals CTC |
| chr20 | 57605357 | C | T | T | Homozygous variant CPP equals CTC |
| chr20 | 57605488 | G | A | A | Homozygous variant CPP equals CTC |
| chr20 | 60881330 | G | A | A | Homozygous variant CPP equals CTC |
| chr20 | 60881780 | T | C | C | Homozygous variant CPP equals CTC |
| chr20 | 61594679 | A | G | G | Homozygous variant CPP equals CTC |
| chr21 | 34925142 | C | T | T | Homozygous variant CPP equals CTC |
| chr21 | 40191431 | T | G | G | Homozygous variant CPP equals CTC |
| chr21 | 40191638 | A | G | G | Homozygous variant CPP equals CTC |
| chr21 | 48063476 | C | G | G | Homozygous variant CPP equals CTC |
| chr22 | 19026613 | A | G | G | Homozygous variant CPP equals CTC |
| chr22 | 23627369 | A | G | G | Homozygous variant CPP equals CTC |
| chr22 | 24108412 | G | A | A | Homozygous variant CPP equals CTC |
| chr22 | 24109774 | T | G | G | Homozygous variant CPP equals CTC |
| chr22 | 29727886 | T | C | C | Homozygous variant CPP equals CTC |
| chr22 | 32435479 | T | G | G | Homozygous variant CPP equals CTC |
| chr22 | 32435488 | T | C | C | Homozygous variant CPP equals CTC |
| chr22 | 32435581 | A | G | G | Homozygous variant CPP equals CTC |
| chr22 | 32435607 | G | A | A | Homozygous variant CPP equals CTC |
| chr22 | 32435631 | C | T | T | Homozygous variant CPP equals CTC |
| chr22 | 32435760 | A | T | T | Homozygous variant CPP equals CTC |
| chr22 | 32435826 | G | T | T | Homozygous variant CPP equals CTC |
| chr22 | 36691607 | A | C | C | Homozygous variant CPP equals CTC |
| chr22 | 41645757 | C | G | G | Homozygous variant CPP equals CTC |
| chr22 | 43529314 | G | C | C | Homozygous variant CPP equals CTC |
| chr22 | 43558926 | A | G | G | Homozygous variant CPP equals CTC |
| chr22 | 44379822 | T | C | C | Homozygous variant CPP equals CTC |
| chr22 | 44379838 | A | G | G | Homozygous variant CPP equals CTC |
| chr22 | 50280136 | T | C | C | Homozygous variant CPP equals CTC |
| chr22 | 50713866 | G | C | C | Homozygous variant CPP equals CTC |
| chr3  | 33138544 | A | G | G | Homozygous variant CPP equals CTC |
| chr3  | 40498845 | C | T | T | Homozygous variant CPP equals CTC |
| chr3  | 45127515 | T | C | C | Homozygous variant CPP equals CTC |
| chr3  | 47018214 | T | C | C | Homozygous variant CPP equals CTC |
| chr3  | 47462200 | T | C | C | Homozygous variant CPP equals CTC |
| chr3  | 49548008 | C | G | G | Homozygous variant CPP equals CTC |
| chr3  | 50329826 | A | G | G | Homozygous variant CPP equals CTC |
| chr3  | 52237970 | C | T | T | Homozygous variant CPP equals CTC |
| chr3  | 52567617 | A | G | G | Homozygous variant CPP equals CTC |

Grillet et al., Supplementary Table 5

|      |           |   |    |    |                                   |
|------|-----------|---|----|----|-----------------------------------|
| chr3 | 52720080  | A | C  | C  | Homozygous variant CPP equals CTC |
| chr3 | 52721305  | G | A  | A  | Homozygous variant CPP equals CTC |
| chr3 | 52727257  | G | A  | A  | Homozygous variant CPP equals CTC |
| chr3 | 52740182  | C | G  | G  | Homozygous variant CPP equals CTC |
| chr3 | 53223927  | C | G  | G  | Homozygous variant CPP equals CTC |
| chr3 | 58416538  | T | C  | C  | Homozygous variant CPP equals CTC |
| chr3 | 87295049  | T | C  | C  | Homozygous variant CPP equals CTC |
| chr3 | 97673268  | A | C  | C  | Homozygous variant CPP equals CTC |
| chr3 | 125786879 | T | C  | C  | Homozygous variant CPP equals CTC |
| chr3 | 128890350 | G | A  | A  | Homozygous variant CPP equals CTC |
| chr3 | 149459341 | A | G  | G  | Homozygous variant CPP equals CTC |
| chr3 | 184037533 | A | G  | G  | Homozygous variant CPP equals CTC |
| chr3 | 184045494 | T | -T | -T | Homozygous variant CPP equals CTC |
| chr3 | 186314860 | T | C  | C  | Homozygous variant CPP equals CTC |
| chr3 | 186314912 | T | A  | A  | Homozygous variant CPP equals CTC |
| chr4 | 858941    | T | C  | C  | Homozygous variant CPP equals CTC |
| chr4 | 1818594   | C | T  | T  | Homozygous variant CPP equals CTC |
| chr4 | 2044128   | C | T  | T  | Homozygous variant CPP equals CTC |
| chr4 | 4276132   | T | C  | C  | Homozygous variant CPP equals CTC |
| chr4 | 22729090  | T | G  | G  | Homozygous variant CPP equals CTC |
| chr4 | 22729244  | A | G  | G  | Homozygous variant CPP equals CTC |
| chr4 | 22729298  | A | G  | G  | Homozygous variant CPP equals CTC |
| chr4 | 37962420  | T | C  | C  | Homozygous variant CPP equals CTC |
| chr4 | 37962590  | T | -T | -T | Homozygous variant CPP equals CTC |
| chr4 | 57889677  | C | T  | T  | Homozygous variant CPP equals CTC |
| chr4 | 69203551  | A | T  | T  | Homozygous variant CPP equals CTC |
| chr4 | 71705262  | A | G  | G  | Homozygous variant CPP equals CTC |
| chr4 | 73991006  | T | C  | C  | Homozygous variant CPP equals CTC |
| chr4 | 83788344  | A | T  | T  | Homozygous variant CPP equals CTC |
| chr4 | 88258483  | T | C  | C  | Homozygous variant CPP equals CTC |
| chr4 | 88813116  | A | G  | G  | Homozygous variant CPP equals CTC |
| chr4 | 88813183  | A | G  | G  | Homozygous variant CPP equals CTC |
| chr4 | 88813247  | G | A  | A  | Homozygous variant CPP equals CTC |
| chr4 | 88813332  | G | T  | T  | Homozygous variant CPP equals CTC |
| chr4 | 88813496  | A | G  | G  | Homozygous variant CPP equals CTC |
| chr4 | 88813503  | T | C  | C  | Homozygous variant CPP equals CTC |
| chr4 | 88813655  | A | G  | G  | Homozygous variant CPP equals CTC |
| chr4 | 88813659  | C | G  | G  | Homozygous variant CPP equals CTC |
| chr4 | 88813725  | C | T  | T  | Homozygous variant CPP equals CTC |
| chr4 | 88813920  | C | T  | T  | Homozygous variant CPP equals CTC |
| chr4 | 88813922  | G | A  | A  | Homozygous variant CPP equals CTC |
| chr4 | 88814058  | G | C  | C  | Homozygous variant CPP equals CTC |
| chr4 | 88814126  | A | G  | G  | Homozygous variant CPP equals CTC |
| chr4 | 88814440  | C | T  | T  | Homozygous variant CPP equals CTC |
| chr4 | 88814483  | T | A  | A  | Homozygous variant CPP equals CTC |
| chr4 | 88814756  | C | T  | T  | Homozygous variant CPP equals CTC |

Grillet et al., Supplementary Table 5

|      |           |   |   |   |                                   |
|------|-----------|---|---|---|-----------------------------------|
| chr4 | 88815037  | A | G | G | Homozygous variant CPP equals CTC |
| chr4 | 88815061  | C | T | T | Homozygous variant CPP equals CTC |
| chr4 | 88815094  | G | A | A | Homozygous variant CPP equals CTC |
| chr4 | 91760143  | G | A | A | Homozygous variant CPP equals CTC |
| chr4 | 95578588  | G | A | A | Homozygous variant CPP equals CTC |
| chr4 | 96762183  | T | C | C | Homozygous variant CPP equals CTC |
| chr4 | 96762198  | T | C | C | Homozygous variant CPP equals CTC |
| chr4 | 108931039 | T | C | C | Homozygous variant CPP equals CTC |
| chr4 | 109543104 | T | C | C | Homozygous variant CPP equals CTC |
| chr4 | 122742217 | T | C | C | Homozygous variant CPP equals CTC |
| chr4 | 144467104 | T | C | C | Homozygous variant CPP equals CTC |
| chr4 | 165118161 | A | G | G | Homozygous variant CPP equals CTC |
| chr4 | 165118214 | C | T | T | Homozygous variant CPP equals CTC |
| chr4 | 165118545 | G | T | T | Homozygous variant CPP equals CTC |
| chr4 | 190396226 | A | T | T | Homozygous variant CPP equals CTC |
| chr4 | 190396244 | C | T | T | Homozygous variant CPP equals CTC |
| chr4 | 190396281 | A | T | T | Homozygous variant CPP equals CTC |
| chr5 | 10258648  | G | A | A | Homozygous variant CPP equals CTC |
| chr5 | 10258650  | A | T | T | Homozygous variant CPP equals CTC |
| chr5 | 10761182  | A | G | G | Homozygous variant CPP equals CTC |
| chr5 | 32403346  | C | T | T | Homozygous variant CPP equals CTC |
| chr5 | 52942083  | A | C | C | Homozygous variant CPP equals CTC |
| chr5 | 60241142  | G | A | A | Homozygous variant CPP equals CTC |
| chr5 | 70945075  | A | G | G | Homozygous variant CPP equals CTC |
| chr5 | 73981270  | T | C | C | Homozygous variant CPP equals CTC |
| chr5 | 75469885  | C | T | T | Homozygous variant CPP equals CTC |
| chr5 | 131892979 | G | A | A | Homozygous variant CPP equals CTC |
| chr5 | 133496676 | A | G | G | Homozygous variant CPP equals CTC |
| chr5 | 140048267 | T | C | C | Homozygous variant CPP equals CTC |
| chr5 | 145499996 | C | T | T | Homozygous variant CPP equals CTC |
| chr5 | 145508340 | A | G | G | Homozygous variant CPP equals CTC |
| chr5 | 145508636 | T | C | C | Homozygous variant CPP equals CTC |
| chr5 | 145508637 | A | C | C | Homozygous variant CPP equals CTC |
| chr5 | 145519821 | G | A | A | Homozygous variant CPP equals CTC |
| chr5 | 145523105 | G | A | A | Homozygous variant CPP equals CTC |
| chr5 | 145539996 | T | G | G | Homozygous variant CPP equals CTC |
| chr5 | 145543972 | G | A | A | Homozygous variant CPP equals CTC |
| chr5 | 145890028 | A | G | G | Homozygous variant CPP equals CTC |
| chr5 | 154395444 | G | A | A | Homozygous variant CPP equals CTC |
| chr5 | 169021610 | C | T | T | Homozygous variant CPP equals CTC |
| chr5 | 176885178 | A | G | G | Homozygous variant CPP equals CTC |
| chr5 | 177482684 | G | A | A | Homozygous variant CPP equals CTC |
| chr5 | 177482745 | C | T | T | Homozygous variant CPP equals CTC |
| chr5 | 177482960 | C | T | T | Homozygous variant CPP equals CTC |
| chr5 | 177483112 | G | C | C | Homozygous variant CPP equals CTC |
| chr5 | 177483154 | T | A | A | Homozygous variant CPP equals CTC |

Grillet et al., Supplementary Table 5

|      |           |   |   |   |                                   |
|------|-----------|---|---|---|-----------------------------------|
| chr5 | 179133255 | A | C | C | Homozygous variant CPP equals CTC |
| chr5 | 179996111 | C | T | T | Homozygous variant CPP equals CTC |
| chr5 | 180218668 | A | G | G | Homozygous variant CPP equals CTC |
| chr5 | 180409322 | A | T | T | Homozygous variant CPP equals CTC |
| chr6 | 1313117   | A | C | C | Homozygous variant CPP equals CTC |
| chr6 | 1313121   | A | C | C | Homozygous variant CPP equals CTC |
| chr6 | 4031998   | A | G | G | Homozygous variant CPP equals CTC |
| chr6 | 7563983   | T | G | G | Homozygous variant CPP equals CTC |
| chr6 | 7986977   | A | T | T | Homozygous variant CPP equals CTC |
| chr6 | 17629616  | G | A | A | Homozygous variant CPP equals CTC |
| chr6 | 26056549  | A | G | G | Homozygous variant CPP equals CTC |
| chr6 | 29857502  | A | C | C | Homozygous variant CPP equals CTC |
| chr6 | 29911228  | A | T | T | Homozygous variant CPP equals CTC |
| chr6 | 29913042  | C | T | T | Homozygous variant CPP equals CTC |
| chr6 | 30711805  | C | G | G | Homozygous variant CPP equals CTC |
| chr6 | 33256471  | T | C | C | Homozygous variant CPP equals CTC |
| chr6 | 34212743  | A | G | G | Homozygous variant CPP equals CTC |
| chr6 | 34213296  | T | C | C | Homozygous variant CPP equals CTC |
| chr6 | 36098333  | T | C | C | Homozygous variant CPP equals CTC |
| chr6 | 37012725  | A | C | C | Homozygous variant CPP equals CTC |
| chr6 | 37012755  | C | T | T | Homozygous variant CPP equals CTC |
| chr6 | 42713618  | A | G | G | Homozygous variant CPP equals CTC |
| chr6 | 44268371  | T | C | C | Homozygous variant CPP equals CTC |
| chr6 | 47563692  | C | T | T | Homozygous variant CPP equals CTC |
| chr6 | 57512565  | T | C | C | Homozygous variant CPP equals CTC |
| chr6 | 63921655  | T | C | C | Homozygous variant CPP equals CTC |
| chr6 | 74001750  | C | T | T | Homozygous variant CPP equals CTC |
| chr6 | 74001756  | G | A | A | Homozygous variant CPP equals CTC |
| chr6 | 74001783  | A | T | T | Homozygous variant CPP equals CTC |
| chr6 | 76369054  | A | G | G | Homozygous variant CPP equals CTC |
| chr6 | 97339088  | C | T | T | Homozygous variant CPP equals CTC |
| chr6 | 116579724 | G | C | C | Homozygous variant CPP equals CTC |
| chr6 | 116579754 | C | A | A | Homozygous variant CPP equals CTC |
| chr6 | 116579808 | A | G | G | Homozygous variant CPP equals CTC |
| chr6 | 116579835 | A | G | G | Homozygous variant CPP equals CTC |
| chr6 | 116579984 | C | T | T | Homozygous variant CPP equals CTC |
| chr6 | 153603515 | G | T | T | Homozygous variant CPP equals CTC |
| chr6 | 153603551 | A | C | C | Homozygous variant CPP equals CTC |
| chr6 | 153603817 | G | C | C | Homozygous variant CPP equals CTC |
| chr7 | 2297006   | A | G | G | Homozygous variant CPP equals CTC |
| chr7 | 2303986   | T | C | C | Homozygous variant CPP equals CTC |
| chr7 | 4900305   | C | T | T | Homozygous variant CPP equals CTC |
| chr7 | 4900342   | C | T | T | Homozygous variant CPP equals CTC |
| chr7 | 4900356   | G | A | A | Homozygous variant CPP equals CTC |
| chr7 | 5254227   | C | G | G | Homozygous variant CPP equals CTC |
| chr7 | 6505901   | T | C | C | Homozygous variant CPP equals CTC |

Grillet et al., Supplementary Table 5

|      |           |   |   |   |                                   |
|------|-----------|---|---|---|-----------------------------------|
| chr7 | 10979642  | C | A | A | Homozygous variant CPP equals CTC |
| chr7 | 23624951  | T | C | C | Homozygous variant CPP equals CTC |
| chr7 | 42977091  | G | A | A | Homozygous variant CPP equals CTC |
| chr7 | 44507560  | A | G | G | Homozygous variant CPP equals CTC |
| chr7 | 44507575  | A | G | G | Homozygous variant CPP equals CTC |
| chr7 | 44507617  | C | T | T | Homozygous variant CPP equals CTC |
| chr7 | 44507678  | G | A | A | Homozygous variant CPP equals CTC |
| chr7 | 50673029  | T | C | C | Homozygous variant CPP equals CTC |
| chr7 | 56126360  | T | C | C | Homozygous variant CPP equals CTC |
| chr7 | 56136260  | C | A | A | Homozygous variant CPP equals CTC |
| chr7 | 75513062  | A | G | G | Homozygous variant CPP equals CTC |
| chr7 | 75614953  | T | C | C | Homozygous variant CPP equals CTC |
| chr7 | 75677430  | C | G | G | Homozygous variant CPP equals CTC |
| chr7 | 99040768  | T | C | C | Homozygous variant CPP equals CTC |
| chr7 | 103007949 | A | C | C | Homozygous variant CPP equals CTC |
| chr7 | 109599719 | G | A | A | Homozygous variant CPP equals CTC |
| chr7 | 109600072 | T | C | C | Homozygous variant CPP equals CTC |
| chr7 | 109600085 | T | C | C | Homozygous variant CPP equals CTC |
| chr7 | 121080928 | T | C | C | Homozygous variant CPP equals CTC |
| chr7 | 121080929 | A | G | G | Homozygous variant CPP equals CTC |
| chr7 | 121080978 | T | C | C | Homozygous variant CPP equals CTC |
| chr7 | 127721507 | T | C | C | Homozygous variant CPP equals CTC |
| chr7 | 128766637 | G | A | A | Homozygous variant CPP equals CTC |
| chr7 | 128766643 | A | T | T | Homozygous variant CPP equals CTC |
| chr7 | 128767093 | T | C | C | Homozygous variant CPP equals CTC |
| chr7 | 128767148 | A | G | G | Homozygous variant CPP equals CTC |
| chr7 | 128767228 | C | A | A | Homozygous variant CPP equals CTC |
| chr7 | 128767549 | A | C | C | Homozygous variant CPP equals CTC |
| chr7 | 128767555 | G | A | A | Homozygous variant CPP equals CTC |
| chr7 | 128767624 | A | G | G | Homozygous variant CPP equals CTC |
| chr7 | 128767631 | A | G | G | Homozygous variant CPP equals CTC |
| chr7 | 132719463 | T | G | G | Homozygous variant CPP equals CTC |
| chr7 | 135304273 | G | C | C | Homozygous variant CPP equals CTC |
| chr7 | 144707206 | T | C | C | Homozygous variant CPP equals CTC |
| chr7 | 150446968 | T | C | C | Homozygous variant CPP equals CTC |
| chr8 | 11683653  | T | C | C | Homozygous variant CPP equals CTC |
| chr8 | 26481771  | T | C | C | Homozygous variant CPP equals CTC |
| chr8 | 29927300  | C | G | G | Homozygous variant CPP equals CTC |
| chr8 | 29927321  | A | G | G | Homozygous variant CPP equals CTC |
| chr8 | 37985897  | A | G | G | Homozygous variant CPP equals CTC |
| chr8 | 38458407  | T | C | C | Homozygous variant CPP equals CTC |
| chr8 | 38458446  | C | T | T | Homozygous variant CPP equals CTC |
| chr8 | 38961550  | G | T | T | Homozygous variant CPP equals CTC |
| chr8 | 48885436  | T | A | A | Homozygous variant CPP equals CTC |
| chr8 | 67679936  | T | C | C | Homozygous variant CPP equals CTC |
| chr8 | 67680113  | A | G | G | Homozygous variant CPP equals CTC |

Grillet et al., Supplementary Table 5

|      |           |   |   |   |                                   |
|------|-----------|---|---|---|-----------------------------------|
| chr8 | 102381236 | G | A | A | Homozygous variant CPP equals CTC |
| chr8 | 120847188 | T | C | C | Homozygous variant CPP equals CTC |
| chr8 | 144697041 | A | G | G | Homozygous variant CPP equals CTC |
| chr8 | 144808747 | G | A | A | Homozygous variant CPP equals CTC |
| chr8 | 144809804 | G | A | A | Homozygous variant CPP equals CTC |
| chr8 | 144811338 | C | G | G | Homozygous variant CPP equals CTC |
| chr8 | 144874554 | T | C | C | Homozygous variant CPP equals CTC |
| chr8 | 144885580 | A | G | G | Homozygous variant CPP equals CTC |
| chr8 | 144889172 | A | G | G | Homozygous variant CPP equals CTC |
| chr8 | 144894496 | G | A | A | Homozygous variant CPP equals CTC |
| chr8 | 145066886 | A | G | G | Homozygous variant CPP equals CTC |
| chr8 | 145150832 | A | G | G | Homozygous variant CPP equals CTC |
| chr8 | 145160646 | T | C | C | Homozygous variant CPP equals CTC |
| chr8 | 145665516 | T | C | C | Homozygous variant CPP equals CTC |
| chr8 | 145737636 | A | G | G | Homozygous variant CPP equals CTC |
| chr8 | 146220609 | A | G | G | Homozygous variant CPP equals CTC |
| chr8 | 146220618 | A | G | G | Homozygous variant CPP equals CTC |
| chr9 | 7798518   | G | C | C | Homozygous variant CPP equals CTC |
| chr9 | 21968199  | C | G | G | Homozygous variant CPP equals CTC |
| chr9 | 33264540  | C | G | G | Homozygous variant CPP equals CTC |
| chr9 | 33624361  | C | T | T | Homozygous variant CPP equals CTC |
| chr9 | 33624449  | G | T | T | Homozygous variant CPP equals CTC |
| chr9 | 33624486  | T | C | C | Homozygous variant CPP equals CTC |
| chr9 | 33624491  | T | G | G | Homozygous variant CPP equals CTC |
| chr9 | 33624634  | A | G | G | Homozygous variant CPP equals CTC |
| chr9 | 33624856  | C | T | T | Homozygous variant CPP equals CTC |
| chr9 | 33624858  | A | G | G | Homozygous variant CPP equals CTC |
| chr9 | 33625051  | C | T | T | Homozygous variant CPP equals CTC |
| chr9 | 33625089  | A | G | G | Homozygous variant CPP equals CTC |
| chr9 | 33625096  | C | T | T | Homozygous variant CPP equals CTC |
| chr9 | 33625225  | C | T | T | Homozygous variant CPP equals CTC |
| chr9 | 33798017  | A | G | G | Homozygous variant CPP equals CTC |
| chr9 | 34635598  | T | C | C | Homozygous variant CPP equals CTC |
| chr9 | 37429814  | A | G | G | Homozygous variant CPP equals CTC |
| chr9 | 37503124  | G | A | A | Homozygous variant CPP equals CTC |
| chr9 | 38395940  | T | C | C | Homozygous variant CPP equals CTC |
| chr9 | 82006263  | A | G | G | Homozygous variant CPP equals CTC |
| chr9 | 125524443 | T | G | G | Homozygous variant CPP equals CTC |
| chr9 | 130630639 | A | G | G | Homozygous variant CPP equals CTC |
| chr9 | 130864676 | T | C | C | Homozygous variant CPP equals CTC |
| chr9 | 130883511 | C | T | T | Homozygous variant CPP equals CTC |
| chr9 | 131085373 | G | C | C | Homozygous variant CPP equals CTC |
| chr9 | 131346218 | A | C | C | Homozygous variant CPP equals CTC |
| chr9 | 131375701 | A | G | G | Homozygous variant CPP equals CTC |
| chr9 | 131483749 | T | A | A | Homozygous variant CPP equals CTC |
| chr9 | 134350458 | C | T | T | Homozygous variant CPP equals CTC |

Grillet et al., Supplementary Table 5

|      |           |   |      |         |                                    |
|------|-----------|---|------|---------|------------------------------------|
| chr9 | 134350647 | T | C    | C       | Homozygous variant CPP equals CTC  |
| chr9 | 134351065 | G | T    | T       | Homozygous variant CPP equals CTC  |
| chr9 | 136227260 | A | G    | G       | Homozygous variant CPP equals CTC  |
| chr9 | 136277480 | A | G    | G       | Homozygous variant CPP equals CTC  |
| chr9 | 138838140 | T | C    | C       | Homozygous variant CPP equals CTC  |
| chr9 | 139726239 | A | G    | G       | Homozygous variant CPP equals CTC  |
| chr9 | 139904037 | A | G    | G       | Homozygous variant CPP equals CTC  |
| chr9 | 140002989 | T | C    | C       | Homozygous variant CPP equals CTC  |
| chr9 | 140006425 | C | G    | G       | Homozygous variant CPP equals CTC  |
| chr9 | 140008750 | G | C    | C       | Homozygous variant CPP equals CTC  |
| chr1 | 957640    | C | C    | C,T     | Heterozygous CTC NOT subset of CPP |
| chr1 | 976730    | C | C    | C,T     | Heterozygous CTC NOT subset of CPP |
| chr1 | 982722    | A | A    | A,G     | Heterozygous CTC NOT subset of CPP |
| chr1 | 985417    | G | G    | +C,G    | Heterozygous CTC NOT subset of CPP |
| chr1 | 1247879   | G | G    | +C,G    | Heterozygous CTC NOT subset of CPP |
| chr1 | 1458183   | C | C    | C,T     | Heterozygous CTC NOT subset of CPP |
| chr1 | 1718836   | G | G    | A,G     | Heterozygous CTC NOT subset of CPP |
| chr1 | 3701663   | T | T    | C,T     | Heterozygous CTC NOT subset of CPP |
| chr1 | 6880261   | C | C    | C,T     | Heterozygous CTC NOT subset of CPP |
| chr1 | 7838229   | G | +T,G | +T,-G,G | Heterozygous CTC NOT subset of CPP |
| chr1 | 11158209  | G | G    | A,G     | Heterozygous CTC NOT subset of CPP |
| chr1 | 15909744  | C | C    | C,T     | Heterozygous CTC NOT subset of CPP |
| chr1 | 16262715  | C | C    | A,C     | Heterozygous CTC NOT subset of CPP |
| chr1 | 16456023  | C | C    | C,T     | Heterozygous CTC NOT subset of CPP |
| chr1 | 16475123  | C | C    | T       | Heterozygous CTC NOT subset of CPP |
| chr1 | 21133836  | T | T    | C,T     | Heterozygous CTC NOT subset of CPP |
| chr1 | 21502757  | C | C    | C,T     | Heterozygous CTC NOT subset of CPP |
| chr1 | 21502760  | T | T    | C,T     | Heterozygous CTC NOT subset of CPP |
| chr1 | 24022888  | A | A    | A,G     | Heterozygous CTC NOT subset of CPP |
| chr1 | 24981439  | A | A    | A,G     | Heterozygous CTC NOT subset of CPP |
| chr1 | 25553993  | T | T    | C,T     | Heterozygous CTC NOT subset of CPP |
| chr1 | 25554719  | G | G    | A,G     | Heterozygous CTC NOT subset of CPP |
| chr1 | 25570081  | T | T    | C,T     | Heterozygous CTC NOT subset of CPP |
| chr1 | 27210721  | T | C    | C,T     | Heterozygous CTC NOT subset of CPP |
| chr1 | 28792952  | C | C    | C,T     | Heterozygous CTC NOT subset of CPP |
| chr1 | 28835426  | A | A    | +T,A    | Heterozygous CTC NOT subset of CPP |
| chr1 | 29475648  | T | G    | G,T     | Heterozygous CTC NOT subset of CPP |
| chr1 | 29542637  | A | G    | A,G     | Heterozygous CTC NOT subset of CPP |
| chr1 | 32096265  | A | G    | A,G     | Heterozygous CTC NOT subset of CPP |
| chr1 | 33478052  | T | T    | A,T     | Heterozygous CTC NOT subset of CPP |
| chr1 | 35321242  | A | A    | A,C     | Heterozygous CTC NOT subset of CPP |
| chr1 | 43395635  | C | C    | C,T     | Heterozygous CTC NOT subset of CPP |
| chr1 | 43396414  | G | G    | A,G     | Heterozygous CTC NOT subset of CPP |
| chr1 | 43408966  | G | G    | A,G     | Heterozygous CTC NOT subset of CPP |
| chr1 | 44085529  | G | G    | -G,G    | Heterozygous CTC NOT subset of CPP |
| chr1 | 44447145  | G | G    | -G,G    | Heterozygous CTC NOT subset of CPP |



Grillet et al., Supplementary Table 5

|      |           |   |   |      |                                    |
|------|-----------|---|---|------|------------------------------------|
| chr1 | 45444038  | G | G | A,G  | Heterozygous CTC NOT subset of CPP |
| chr1 | 46078854  | A | G | A,G  | Heterozygous CTC NOT subset of CPP |
| chr1 | 46078884  | C | T | C,T  | Heterozygous CTC NOT subset of CPP |
| chr1 | 46094027  | A | A | A,G  | Heterozygous CTC NOT subset of CPP |
| chr1 | 46491476  | C | C | C,T  | Heterozygous CTC NOT subset of CPP |
| chr1 | 52246956  | C | C | C,T  | Heterozygous CTC NOT subset of CPP |
| chr1 | 52264064  | A | A | A,G  | Heterozygous CTC NOT subset of CPP |
| chr1 | 52266350  | C | C | C,T  | Heterozygous CTC NOT subset of CPP |
| chr1 | 52306066  | T | T | A,T  | Heterozygous CTC NOT subset of CPP |
| chr1 | 53681671  | G | G | G,T  | Heterozygous CTC NOT subset of CPP |
| chr1 | 53686262  | C | C | A,C  | Heterozygous CTC NOT subset of CPP |
| chr1 | 55505668  | C | C | C,T  | Heterozygous CTC NOT subset of CPP |
| chr1 | 76257892  | A | T | A,T  | Heterozygous CTC NOT subset of CPP |
| chr1 | 85742012  | G | G | C,G  | Heterozygous CTC NOT subset of CPP |
| chr1 | 89448963  | G | C | C,G  | Heterozygous CTC NOT subset of CPP |
| chr1 | 93826178  | A | A | A,T  | Heterozygous CTC NOT subset of CPP |
| chr1 | 108700241 | C | C | -C,C | Heterozygous CTC NOT subset of CPP |
| chr1 | 110295772 | T | C | C,T  | Heterozygous CTC NOT subset of CPP |
| chr1 | 110300441 | G | A | A,G  | Heterozygous CTC NOT subset of CPP |
| chr1 | 114948146 | G | G | A,G  | Heterozygous CTC NOT subset of CPP |
| chr1 | 146736092 | C | C | C,T  | Heterozygous CTC NOT subset of CPP |
| chr1 | 146740502 | C | C | C,G  | Heterozygous CTC NOT subset of CPP |
| chr1 | 151260240 | A | A | A,T  | Heterozygous CTC NOT subset of CPP |
| chr1 | 154561925 | C | C | C,T  | Heterozygous CTC NOT subset of CPP |
| chr1 | 156202173 | A | A | A,G  | Heterozygous CTC NOT subset of CPP |
| chr1 | 156206121 | G | G | A,G  | Heterozygous CTC NOT subset of CPP |
| chr1 | 156697056 | T | T | C,T  | Heterozygous CTC NOT subset of CPP |
| chr1 | 161126754 | C | C | C,G  | Heterozygous CTC NOT subset of CPP |
| chr1 | 167893759 | G | G | A,G  | Heterozygous CTC NOT subset of CPP |
| chr1 | 171483717 | A | A | A,C  | Heterozygous CTC NOT subset of CPP |
| chr1 | 171509327 | G | A | A,G  | Heterozygous CTC NOT subset of CPP |
| chr1 | 171511039 | C | G | C,G  | Heterozygous CTC NOT subset of CPP |
| chr1 | 171514731 | C | G | C,G  | Heterozygous CTC NOT subset of CPP |
| chr1 | 171526570 | G | A | A,G  | Heterozygous CTC NOT subset of CPP |
| chr1 | 171556165 | G | C | C,G  | Heterozygous CTC NOT subset of CPP |
| chr1 | 178745914 | C | C | C,T  | Heterozygous CTC NOT subset of CPP |
| chr1 | 180145088 | A | G | A,G  | Heterozygous CTC NOT subset of CPP |
| chr1 | 201934578 | G | G | A,G  | Heterozygous CTC NOT subset of CPP |
| chr1 | 202911309 | G | G | G,T  | Heterozygous CTC NOT subset of CPP |
| chr1 | 210006603 | C | T | C,T  | Heterozygous CTC NOT subset of CPP |
| chr1 | 212965095 | G | G | A,G  | Heterozygous CTC NOT subset of CPP |
| chr1 | 220142441 | C | C | C,G  | Heterozygous CTC NOT subset of CPP |
| chr1 | 223905532 | G | A | A,G  | Heterozygous CTC NOT subset of CPP |
| chr1 | 228288896 | C | C | C,T  | Heterozygous CTC NOT subset of CPP |
| chr1 | 231376806 | G | G | C,G  | Heterozygous CTC NOT subset of CPP |
| chr1 | 234744889 | G | G | A,G  | Heterozygous CTC NOT subset of CPP |

Grillet et al., Supplementary Table 5

|       |           |   |   |      |                                    |
|-------|-----------|---|---|------|------------------------------------|
| chr1  | 235324298 | T | T | C,T  | Heterozygous CTC NOT subset of CPP |
| chr1  | 235324545 | T | T | A,T  | Heterozygous CTC NOT subset of CPP |
| chr1  | 235383188 | A | A | A,G  | Heterozygous CTC NOT subset of CPP |
| chr1  | 235392546 | T | T | C,T  | Heterozygous CTC NOT subset of CPP |
| chr1  | 246707858 | A | A | A,G  | Heterozygous CTC NOT subset of CPP |
| chr1  | 246930564 | G | G | C,G  | Heterozygous CTC NOT subset of CPP |
| chr10 | 1051792   | C | C | C,T  | Heterozygous CTC NOT subset of CPP |
| chr10 | 1060218   | G | G | A,G  | Heterozygous CTC NOT subset of CPP |
| chr10 | 1061767   | G | G | A,G  | Heterozygous CTC NOT subset of CPP |
| chr10 | 3150973   | C | C | C,T  | Heterozygous CTC NOT subset of CPP |
| chr10 | 3180298   | C | C | C,T  | Heterozygous CTC NOT subset of CPP |
| chr10 | 3180316   | T | T | C,T  | Heterozygous CTC NOT subset of CPP |
| chr10 | 3189380   | C | T | C,T  | Heterozygous CTC NOT subset of CPP |
| chr10 | 6150677   | C | C | A,C  | Heterozygous CTC NOT subset of CPP |
| chr10 | 14939067  | A | A | A,C  | Heterozygous CTC NOT subset of CPP |
| chr10 | 16796919  | C | A | A,C  | Heterozygous CTC NOT subset of CPP |
| chr10 | 27434483  | G | G | A,G  | Heterozygous CTC NOT subset of CPP |
| chr10 | 34666952  | G | G | A,G  | Heterozygous CTC NOT subset of CPP |
| chr10 | 43312807  | C | C | C,T  | Heterozygous CTC NOT subset of CPP |
| chr10 | 51582894  | C | C | C,T  | Heterozygous CTC NOT subset of CPP |
| chr10 | 53458047  | A | A | A,G  | Heterozygous CTC NOT subset of CPP |
| chr10 | 53458998  | A | A | A,G  | Heterozygous CTC NOT subset of CPP |
| chr10 | 72644988  | G | G | +C,G | Heterozygous CTC NOT subset of CPP |
| chr10 | 73610949  | G | G | A,G  | Heterozygous CTC NOT subset of CPP |
| chr10 | 74095688  | C | C | +T,C | Heterozygous CTC NOT subset of CPP |
| chr10 | 74096385  | G | G | A,G  | Heterozygous CTC NOT subset of CPP |
| chr10 | 74834651  | T | T | C,T  | Heterozygous CTC NOT subset of CPP |
| chr10 | 74894375  | T | T | C,T  | Heterozygous CTC NOT subset of CPP |
| chr10 | 74897816  | C | C | C,T  | Heterozygous CTC NOT subset of CPP |
| chr10 | 74899134  | C | C | C,G  | Heterozygous CTC NOT subset of CPP |
| chr10 | 75009107  | T | T | A,T  | Heterozygous CTC NOT subset of CPP |
| chr10 | 75148116  | A | A | A,G  | Heterozygous CTC NOT subset of CPP |
| chr10 | 75506674  | T | T | C,T  | Heterozygous CTC NOT subset of CPP |
| chr10 | 75527708  | A | A | A,G  | Heterozygous CTC NOT subset of CPP |
| chr10 | 95459817  | C | T | C,T  | Heterozygous CTC NOT subset of CPP |
| chr10 | 96114835  | G | G | A,G  | Heterozygous CTC NOT subset of CPP |
| chr10 | 99126513  | C | C | C,T  | Heterozygous CTC NOT subset of CPP |
| chr10 | 99129230  | T | T | C,T  | Heterozygous CTC NOT subset of CPP |
| chr10 | 101166544 | C | C | C,T  | Heterozygous CTC NOT subset of CPP |
| chr10 | 101912064 | T | T | C,T  | Heterozygous CTC NOT subset of CPP |
| chr10 | 103920475 | T | T | C,T  | Heterozygous CTC NOT subset of CPP |
| chr10 | 104436641 | C | C | C,T  | Heterozygous CTC NOT subset of CPP |
| chr10 | 105177645 | G | G | G,T  | Heterozygous CTC NOT subset of CPP |
| chr10 | 120920588 | T | T | C,T  | Heterozygous CTC NOT subset of CPP |
| chr10 | 121436306 | G | G | A,G  | Heterozygous CTC NOT subset of CPP |
| chr10 | 129899922 | T | T | C,T  | Heterozygous CTC NOT subset of CPP |

Grillet et al., Supplementary Table 5

|       |           |   |   |     |                                    |
|-------|-----------|---|---|-----|------------------------------------|
| chr10 | 129901066 | C | C | A,C | Heterozygous CTC NOT subset of CPP |
| chr10 | 129901570 | C | C | C,T | Heterozygous CTC NOT subset of CPP |
| chr10 | 129902368 | T | T | A,T | Heterozygous CTC NOT subset of CPP |
| chr10 | 129903094 | G | G | G,T | Heterozygous CTC NOT subset of CPP |
| chr10 | 135106014 | G | G | A,G | Heterozygous CTC NOT subset of CPP |
| chr10 | 135184126 | G | A | A,G | Heterozygous CTC NOT subset of CPP |
| chr10 | 135186806 | A | G | A,G | Heterozygous CTC NOT subset of CPP |
| chr11 | 214421    | G | G | C,G | Heterozygous CTC NOT subset of CPP |
| chr11 | 400040    | A | A | A,G | Heterozygous CTC NOT subset of CPP |
| chr11 | 499059    | C | C | C,T | Heterozygous CTC NOT subset of CPP |
| chr11 | 499066    | C | C | C,T | Heterozygous CTC NOT subset of CPP |
| chr11 | 499120    | G | G | A,G | Heterozygous CTC NOT subset of CPP |
| chr11 | 563400    | C | C | C,T | Heterozygous CTC NOT subset of CPP |
| chr11 | 644614    | G | G | C,G | Heterozygous CTC NOT subset of CPP |
| chr11 | 720197    | C | T | C,T | Heterozygous CTC NOT subset of CPP |
| chr11 | 721570    | C | T | C,T | Heterozygous CTC NOT subset of CPP |
| chr11 | 993814    | C | C | C,T | Heterozygous CTC NOT subset of CPP |
| chr11 | 1317007   | G | G | G,T | Heterozygous CTC NOT subset of CPP |
| chr11 | 1972143   | G | G | A,G | Heterozygous CTC NOT subset of CPP |
| chr11 | 1972205   | G | G | A,G | Heterozygous CTC NOT subset of CPP |
| chr11 | 1977552   | G | G | A,G | Heterozygous CTC NOT subset of CPP |
| chr11 | 6632450   | C | C | C,T | Heterozygous CTC NOT subset of CPP |
| chr11 | 11941999  | C | C | C,T | Heterozygous CTC NOT subset of CPP |
| chr11 | 17519742  | C | G | C,G | Heterozygous CTC NOT subset of CPP |
| chr11 | 17522638  | G | A | A,G | Heterozygous CTC NOT subset of CPP |
| chr11 | 17542439  | T | T | C   | Heterozygous CTC NOT subset of CPP |
| chr11 | 34158274  | G | G | A,G | Heterozygous CTC NOT subset of CPP |
| chr11 | 34999682  | G | G | C,G | Heterozygous CTC NOT subset of CPP |
| chr11 | 35201842  | C | T | C,T | Heterozygous CTC NOT subset of CPP |
| chr11 | 43837930  | T | T | C,T | Heterozygous CTC NOT subset of CPP |
| chr11 | 43876698  | C | C | C,T | Heterozygous CTC NOT subset of CPP |
| chr11 | 44640268  | A | G | A,G | Heterozygous CTC NOT subset of CPP |
| chr11 | 46403649  | G | G | A,G | Heterozygous CTC NOT subset of CPP |
| chr11 | 47640429  | G | G | C,G | Heterozygous CTC NOT subset of CPP |
| chr11 | 57076820  | T | T | G,T | Heterozygous CTC NOT subset of CPP |
| chr11 | 60609972  | A | A | A,G | Heterozygous CTC NOT subset of CPP |
| chr11 | 60658301  | C | C | C,T | Heterozygous CTC NOT subset of CPP |
| chr11 | 60698054  | G | G | A   | Heterozygous CTC NOT subset of CPP |
| chr11 | 60699533  | C | C | C,T | Heterozygous CTC NOT subset of CPP |
| chr11 | 60906279  | G | G | G,T | Heterozygous CTC NOT subset of CPP |
| chr11 | 62340214  | T | T | C,T | Heterozygous CTC NOT subset of CPP |
| chr11 | 62364280  | G | G | A,G | Heterozygous CTC NOT subset of CPP |
| chr11 | 62575025  | A | A | A,T | Heterozygous CTC NOT subset of CPP |
| chr11 | 62592961  | T | T | C,T | Heterozygous CTC NOT subset of CPP |
| chr11 | 62602983  | A | A | A,G | Heterozygous CTC NOT subset of CPP |
| chr11 | 64085819  | C | C | A,C | Heterozygous CTC NOT subset of CPP |

Grillet et al., Supplementary Table 5

|       |           |   |   |      |                                    |
|-------|-----------|---|---|------|------------------------------------|
| chr11 | 64882789  | C | C | C,T  | Heterozygous CTC NOT subset of CPP |
| chr11 | 65273493  | A | A | A,G  | Heterozygous CTC NOT subset of CPP |
| chr11 | 65359535  | C | C | C,G  | Heterozygous CTC NOT subset of CPP |
| chr11 | 65380916  | G | G | A,G  | Heterozygous CTC NOT subset of CPP |
| chr11 | 65629482  | G | G | A,G  | Heterozygous CTC NOT subset of CPP |
| chr11 | 65664346  | T | C | C,T  | Heterozygous CTC NOT subset of CPP |
| chr11 | 65667793  | C | C | C,T  | Heterozygous CTC NOT subset of CPP |
| chr11 | 65667796  | G | A | A,G  | Heterozygous CTC NOT subset of CPP |
| chr11 | 67200108  | C | C | A,C  | Heterozygous CTC NOT subset of CPP |
| chr11 | 67804074  | C | C | C,T  | Heterozygous CTC NOT subset of CPP |
| chr11 | 68560787  | C | C | C,T  | Heterozygous CTC NOT subset of CPP |
| chr11 | 69063136  | C | T | C,T  | Heterozygous CTC NOT subset of CPP |
| chr11 | 69063393  | T | C | C,T  | Heterozygous CTC NOT subset of CPP |
| chr11 | 69063728  | G | C | C,G  | Heterozygous CTC NOT subset of CPP |
| chr11 | 69462910  | G | G | A,G  | Heterozygous CTC NOT subset of CPP |
| chr11 | 69469030  | A | A | A,G  | Heterozygous CTC NOT subset of CPP |
| chr11 | 71146508  | G | G | A,G  | Heterozygous CTC NOT subset of CPP |
| chr11 | 71146577  | G | A | A,G  | Heterozygous CTC NOT subset of CPP |
| chr11 | 71146691  | A | G | A,G  | Heterozygous CTC NOT subset of CPP |
| chr11 | 71152461  | A | G | A,G  | Heterozygous CTC NOT subset of CPP |
| chr11 | 71155153  | A | G | A,G  | Heterozygous CTC NOT subset of CPP |
| chr11 | 71155171  | C | T | C,T  | Heterozygous CTC NOT subset of CPP |
| chr11 | 71821236  | A | A | A,G  | Heterozygous CTC NOT subset of CPP |
| chr11 | 71941212  | A | A | G    | Heterozygous CTC NOT subset of CPP |
| chr11 | 71945332  | A | A | A,G  | Heterozygous CTC NOT subset of CPP |
| chr11 | 71948536  | C | C | C,G  | Heterozygous CTC NOT subset of CPP |
| chr11 | 72040784  | T | T | C,T  | Heterozygous CTC NOT subset of CPP |
| chr11 | 74994352  | G | G | A,G  | Heterozygous CTC NOT subset of CPP |
| chr11 | 75112769  | A | A | A,G  | Heterozygous CTC NOT subset of CPP |
| chr11 | 75277628  | A | A | G    | Heterozygous CTC NOT subset of CPP |
| chr11 | 77553638  | T | T | C,T  | Heterozygous CTC NOT subset of CPP |
| chr11 | 78279790  | T | G | G,T  | Heterozygous CTC NOT subset of CPP |
| chr11 | 85365174  | A | A | A,G  | Heterozygous CTC NOT subset of CPP |
| chr11 | 95564259  | A | A | A,G  | Heterozygous CTC NOT subset of CPP |
| chr11 | 95578270  | C | C | C,T  | Heterozygous CTC NOT subset of CPP |
| chr11 | 95580926  | G | G | A,G  | Heterozygous CTC NOT subset of CPP |
| chr11 | 95657111  | T | T | G,T  | Heterozygous CTC NOT subset of CPP |
| chr11 | 111754574 | A | C | A    | Heterozygous CTC NOT subset of CPP |
| chr11 | 117097952 | C | C | C,T  | Heterozygous CTC NOT subset of CPP |
| chr11 | 118454607 | C | C | +A,C | Heterozygous CTC NOT subset of CPP |
| chr11 | 118769442 | A | A | A,G  | Heterozygous CTC NOT subset of CPP |
| chr11 | 118772287 | A | A | A,G  | Heterozygous CTC NOT subset of CPP |
| chr11 | 120099679 | G | A | A,G  | Heterozygous CTC NOT subset of CPP |
| chr11 | 120328858 | T | T | C,T  | Heterozygous CTC NOT subset of CPP |
| chr11 | 120355791 | G | G | G,T  | Heterozygous CTC NOT subset of CPP |
| chr11 | 126176578 | G | G | A,G  | Heterozygous CTC NOT subset of CPP |

Grillet et al., Supplementary Table 5

|       |           |   |       |         |                                    |
|-------|-----------|---|-------|---------|------------------------------------|
| chr11 | 126277216 | C | C     | C,T     | Heterozygous CTC NOT subset of CPP |
| chr11 | 130066335 | C | C     | C,T     | Heterozygous CTC NOT subset of CPP |
| chr11 | 134244123 | C | G     | C,G     | Heterozygous CTC NOT subset of CPP |
| chr12 | 993930    | C | C     | C,T     | Heterozygous CTC NOT subset of CPP |
| chr12 | 1702612   | G | G     | A,G     | Heterozygous CTC NOT subset of CPP |
| chr12 | 6495275   | C | A     | A,C     | Heterozygous CTC NOT subset of CPP |
| chr12 | 6500105   | T | G     | G,T     | Heterozygous CTC NOT subset of CPP |
| chr12 | 6638116   | C | C     | C,T     | Heterozygous CTC NOT subset of CPP |
| chr12 | 6640676   | T | T     | A,T     | Heterozygous CTC NOT subset of CPP |
| chr12 | 6643991   | C | C     | C,G     | Heterozygous CTC NOT subset of CPP |
| chr12 | 7046077   | G | G     | A,G     | Heterozygous CTC NOT subset of CPP |
| chr12 | 7047143   | C | C     | A,C     | Heterozygous CTC NOT subset of CPP |
| chr12 | 7055103   | T | T     | A,T     | Heterozygous CTC NOT subset of CPP |
| chr12 | 10875488  | T | T     | C,T     | Heterozygous CTC NOT subset of CPP |
| chr12 | 46321753  | T | T     | A,T     | Heterozygous CTC NOT subset of CPP |
| chr12 | 48190044  | C | T     | C       | Heterozygous CTC NOT subset of CPP |
| chr12 | 49061511  | T | T     | C,T     | Heterozygous CTC NOT subset of CPP |
| chr12 | 49332238  | T | T     | C,T     | Heterozygous CTC NOT subset of CPP |
| chr12 | 49332451  | T | T     | +GA,T   | Heterozygous CTC NOT subset of CPP |
| chr12 | 51213433  | A | A     | A,G     | Heterozygous CTC NOT subset of CPP |
| chr12 | 51442944  | G | G     | A,G     | Heterozygous CTC NOT subset of CPP |
| chr12 | 51492647  | A | A     | A,G     | Heterozygous CTC NOT subset of CPP |
| chr12 | 51636259  | C | T     | C,T     | Heterozygous CTC NOT subset of CPP |
| chr12 | 51639881  | G | G     | A,G     | Heterozygous CTC NOT subset of CPP |
| chr12 | 52448157  | G | G     | A,G     | Heterozygous CTC NOT subset of CPP |
| chr12 | 53298440  | A | A,G,T | A,C,G,T | Heterozygous CTC NOT subset of CPP |
| chr12 | 53298775  | A | A     | T       | Heterozygous CTC NOT subset of CPP |
| chr12 | 53346560  | C | C     | C,T     | Heterozygous CTC NOT subset of CPP |
| chr12 | 53856273  | C | C     | C,G     | Heterozygous CTC NOT subset of CPP |
| chr12 | 53856274  | C | C     | C,G     | Heterozygous CTC NOT subset of CPP |
| chr12 | 56825311  | C | C     | C,T     | Heterozygous CTC NOT subset of CPP |
| chr12 | 56827694  | C | G     | C,G     | Heterozygous CTC NOT subset of CPP |
| chr12 | 56992457  | C | C     | C,T     | Heterozygous CTC NOT subset of CPP |
| chr12 | 56994170  | C | C     | C,T     | Heterozygous CTC NOT subset of CPP |
| chr12 | 57006998  | T | T     | C,T     | Heterozygous CTC NOT subset of CPP |
| chr12 | 57892216  | C | C     | C,T     | Heterozygous CTC NOT subset of CPP |
| chr12 | 65004520  | A | A     | A,G     | Heterozygous CTC NOT subset of CPP |
| chr12 | 68052178  | G | G     | G,T     | Heterozygous CTC NOT subset of CPP |
| chr12 | 69127245  | C | C     | C,T     | Heterozygous CTC NOT subset of CPP |
| chr12 | 69986788  | A | A     | A,G     | Heterozygous CTC NOT subset of CPP |
| chr12 | 76424952  | C | C     | C,G     | Heterozygous CTC NOT subset of CPP |
| chr12 | 80083954  | T | T     | C,T     | Heterozygous CTC NOT subset of CPP |
| chr12 | 80189517  | C | C     | C,T     | Heterozygous CTC NOT subset of CPP |
| chr12 | 89744663  | G | G     | G,T     | Heterozygous CTC NOT subset of CPP |
| chr12 | 90028901  | T | T     | C,T     | Heterozygous CTC NOT subset of CPP |
| chr12 | 102108420 | G | G     | +A,G    | Heterozygous CTC NOT subset of CPP |

Grillet et al., Supplementary Table 5

|       |           |   |     |         |                                    |
|-------|-----------|---|-----|---------|------------------------------------|
| chr12 | 102455729 | G | G   | A,G     | Heterozygous CTC NOT subset of CPP |
| chr12 | 104341103 | C | C   | C,T     | Heterozygous CTC NOT subset of CPP |
| chr12 | 104341590 | T | C,T | A,C,G,T | Heterozygous CTC NOT subset of CPP |
| chr12 | 104709559 | C | C   | C,T     | Heterozygous CTC NOT subset of CPP |
| chr12 | 105380152 | A | A   | A,C     | Heterozygous CTC NOT subset of CPP |
| chr12 | 110841437 | C | C   | C,T     | Heterozygous CTC NOT subset of CPP |
| chr12 | 120591143 | A | A   | A,G     | Heterozygous CTC NOT subset of CPP |
| chr12 | 120608031 | A | A   | A,G     | Heterozygous CTC NOT subset of CPP |
| chr12 | 122692820 | T | C   | C,T     | Heterozygous CTC NOT subset of CPP |
| chr12 | 124074974 | C | C   | C,T     | Heterozygous CTC NOT subset of CPP |
| chr12 | 124104551 | A | A   | A,G     | Heterozygous CTC NOT subset of CPP |
| chr12 | 124979789 | T | T   | G,T     | Heterozygous CTC NOT subset of CPP |
| chr12 | 125348263 | C | C   | C,T     | Heterozygous CTC NOT subset of CPP |
| chr12 | 125397517 | G | G   | A,G     | Heterozygous CTC NOT subset of CPP |
| chr12 | 132625960 | G | G   | A,G     | Heterozygous CTC NOT subset of CPP |
| chr12 | 132628809 | G | G   | A,G     | Heterozygous CTC NOT subset of CPP |
| chr12 | 133159662 | G | G   | A,G     | Heterozygous CTC NOT subset of CPP |
| chr12 | 133272470 | G | G   | G,T     | Heterozygous CTC NOT subset of CPP |
| chr12 | 133294333 | C | C   | C,T     | Heterozygous CTC NOT subset of CPP |
| chr12 | 133303973 | C | C   | C,G     | Heterozygous CTC NOT subset of CPP |
| chr12 | 133306710 | C | C   | C,T     | Heterozygous CTC NOT subset of CPP |
| chr12 | 133312078 | G | G   | A,G     | Heterozygous CTC NOT subset of CPP |
| chr12 | 133331364 | G | G   | A,G     | Heterozygous CTC NOT subset of CPP |
| chr12 | 133331537 | G | G   | A,G     | Heterozygous CTC NOT subset of CPP |
| chr13 | 22178258  | C | C   | C,T     | Heterozygous CTC NOT subset of CPP |
| chr13 | 25075859  | C | T   | C,T     | Heterozygous CTC NOT subset of CPP |
| chr13 | 28239940  | G | C   | G       | Heterozygous CTC NOT subset of CPP |
| chr13 | 48547467  | A | T   | A,T     | Heterozygous CTC NOT subset of CPP |
| chr13 | 49772401  | G | G   | -G,G    | Heterozygous CTC NOT subset of CPP |
| chr13 | 52603458  | C | T   | C,T     | Heterozygous CTC NOT subset of CPP |
| chr13 | 73637991  | C | C   | A,C     | Heterozygous CTC NOT subset of CPP |
| chr13 | 98645253  | A | A   | A,G     | Heterozygous CTC NOT subset of CPP |
| chr13 | 111290967 | T | T   | C,T     | Heterozygous CTC NOT subset of CPP |
| chr13 | 111291044 | T | T   | C,T     | Heterozygous CTC NOT subset of CPP |
| chr13 | 111293915 | T | T   | G,T     | Heterozygous CTC NOT subset of CPP |
| chr13 | 111298392 | A | A   | A,G     | Heterozygous CTC NOT subset of CPP |
| chr14 | 21679564  | C | C   | C,G     | Heterozygous CTC NOT subset of CPP |
| chr14 | 23504021  | G | G   | A,G     | Heterozygous CTC NOT subset of CPP |
| chr14 | 23547416  | T | T   | C,T     | Heterozygous CTC NOT subset of CPP |
| chr14 | 24573005  | C | C   | C,T     | Heterozygous CTC NOT subset of CPP |
| chr14 | 24909362  | T | C   | C,T     | Heterozygous CTC NOT subset of CPP |
| chr14 | 24909475  | C | G   | C,G     | Heterozygous CTC NOT subset of CPP |
| chr14 | 24910973  | T | G   | G,T     | Heterozygous CTC NOT subset of CPP |
| chr14 | 24910974  | T | A   | A,T     | Heterozygous CTC NOT subset of CPP |
| chr14 | 50100386  | T | C   | C,T     | Heterozygous CTC NOT subset of CPP |
| chr14 | 50100683  | C | G   | C,G     | Heterozygous CTC NOT subset of CPP |

Grillet et al., Supplementary Table 5

|       |           |   |   |        |                                    |
|-------|-----------|---|---|--------|------------------------------------|
| chr14 | 55605036  | A | A | A,C    | Heterozygous CTC NOT subset of CPP |
| chr14 | 62194239  | G | G | A,G    | Heterozygous CTC NOT subset of CPP |
| chr14 | 62207557  | C | C | C,T    | Heterozygous CTC NOT subset of CPP |
| chr14 | 69352230  | G | G | A,G    | Heterozygous CTC NOT subset of CPP |
| chr14 | 73577801  | A | A | A,G    | Heterozygous CTC NOT subset of CPP |
| chr14 | 92588002  | T | T | G      | Heterozygous CTC NOT subset of CPP |
| chr14 | 92625551  | G | G | C,G    | Heterozygous CTC NOT subset of CPP |
| chr14 | 94524216  | T | T | C,T    | Heterozygous CTC NOT subset of CPP |
| chr14 | 102378807 | C | C | C,T    | Heterozygous CTC NOT subset of CPP |
| chr14 | 102551197 | C | C | C,T    | Heterozygous CTC NOT subset of CPP |
| chr14 | 105478102 | G | A | A,G    | Heterozygous CTC NOT subset of CPP |
| chr15 | 22960868  | G | G | C,G    | Heterozygous CTC NOT subset of CPP |
| chr15 | 30008889  | G | A | A,G    | Heterozygous CTC NOT subset of CPP |
| chr15 | 34522088  | A | A | A,C    | Heterozygous CTC NOT subset of CPP |
| chr15 | 34522109  | C | C | -CT,C  | Heterozygous CTC NOT subset of CPP |
| chr15 | 34634124  | C | C | C,G    | Heterozygous CTC NOT subset of CPP |
| chr15 | 34634138  | G | G | A,G    | Heterozygous CTC NOT subset of CPP |
| chr15 | 34634139  | T | T | C,T    | Heterozygous CTC NOT subset of CPP |
| chr15 | 34674048  | G | G | A,G    | Heterozygous CTC NOT subset of CPP |
| chr15 | 40462780  | G | G | A,G    | Heterozygous CTC NOT subset of CPP |
| chr15 | 40477831  | G | A | A,G    | Heterozygous CTC NOT subset of CPP |
| chr15 | 41672384  | A | A | A,G    | Heterozygous CTC NOT subset of CPP |
| chr15 | 43483843  | T | T | C,T    | Heterozygous CTC NOT subset of CPP |
| chr15 | 43486656  | C | C | +A,C   | Heterozygous CTC NOT subset of CPP |
| chr15 | 44092949  | G | G | A,G    | Heterozygous CTC NOT subset of CPP |
| chr15 | 64418397  | G | A | A,G    | Heterozygous CTC NOT subset of CPP |
| chr15 | 65447268  | A | A | A,G    | Heterozygous CTC NOT subset of CPP |
| chr15 | 67524227  | G | G | A,G    | Heterozygous CTC NOT subset of CPP |
| chr15 | 69747829  | T | T | G,T    | Heterozygous CTC NOT subset of CPP |
| chr15 | 70345626  | C | T | C,T    | Heterozygous CTC NOT subset of CPP |
| chr15 | 70351788  | T | C | C,T    | Heterozygous CTC NOT subset of CPP |
| chr15 | 70960068  | G | A | A,G    | Heterozygous CTC NOT subset of CPP |
| chr15 | 73075800  | C | C | +C,C,T | Heterozygous CTC NOT subset of CPP |
| chr15 | 73996066  | G | G | A,G    | Heterozygous CTC NOT subset of CPP |
| chr15 | 73996101  | G | G | A,G    | Heterozygous CTC NOT subset of CPP |
| chr15 | 74000729  | G | G | C,G    | Heterozygous CTC NOT subset of CPP |
| chr15 | 74001993  | T | T | C,T    | Heterozygous CTC NOT subset of CPP |
| chr15 | 74918245  | C | C | C,T    | Heterozygous CTC NOT subset of CPP |
| chr15 | 75131661  | A | G | A,G    | Heterozygous CTC NOT subset of CPP |
| chr15 | 75165667  | C | C | A,C    | Heterozygous CTC NOT subset of CPP |
| chr15 | 75188500  | C | C | A,C    | Heterozygous CTC NOT subset of CPP |
| chr15 | 75648650  | C | C | C,T    | Heterozygous CTC NOT subset of CPP |
| chr15 | 89169858  | A | G | A,G    | Heterozygous CTC NOT subset of CPP |
| chr15 | 89172558  | G | C | C,G    | Heterozygous CTC NOT subset of CPP |
| chr15 | 89173657  | A | T | A,T    | Heterozygous CTC NOT subset of CPP |
| chr15 | 89803944  | G | G | C,G    | Heterozygous CTC NOT subset of CPP |

Grillet et al., Supplementary Table 5

|       |           |   |       |         |                                    |
|-------|-----------|---|-------|---------|------------------------------------|
| chr15 | 89804043  | C | C     | C,T     | Heterozygous CTC NOT subset of CPP |
| chr15 | 89836228  | G | G     | C,G     | Heterozygous CTC NOT subset of CPP |
| chr15 | 89858602  | T | T     | C,T     | Heterozygous CTC NOT subset of CPP |
| chr15 | 89859932  | A | A     | +C,A    | Heterozygous CTC NOT subset of CPP |
| chr15 | 89859994  | C | C     | A,C     | Heterozygous CTC NOT subset of CPP |
| chr15 | 90777120  | C | C     | A,C     | Heterozygous CTC NOT subset of CPP |
| chr15 | 101718239 | C | C     | C,G     | Heterozygous CTC NOT subset of CPP |
| chr16 | 597112    | G | G     | A,G     | Heterozygous CTC NOT subset of CPP |
| chr16 | 597214    | A | A     | A,G     | Heterozygous CTC NOT subset of CPP |
| chr16 | 692198    | C | C     | C,T     | Heterozygous CTC NOT subset of CPP |
| chr16 | 842518    | C | C     | C,T     | Heterozygous CTC NOT subset of CPP |
| chr16 | 1555589   | A | A     | A,G     | Heterozygous CTC NOT subset of CPP |
| chr16 | 1559838   | T | T     | C,T     | Heterozygous CTC NOT subset of CPP |
| chr16 | 1822517   | G | G     | -G,G    | Heterozygous CTC NOT subset of CPP |
| chr16 | 2025411   | G | G     | C,G     | Heterozygous CTC NOT subset of CPP |
| chr16 | 2025602   | A | A     | A,G     | Heterozygous CTC NOT subset of CPP |
| chr16 | 2026292   | T | T     | C,T     | Heterozygous CTC NOT subset of CPP |
| chr16 | 2026891   | T | T     | C,T     | Heterozygous CTC NOT subset of CPP |
| chr16 | 2035907   | T | T     | C,T     | Heterozygous CTC NOT subset of CPP |
| chr16 | 2035999   | C | C     | C,T     | Heterozygous CTC NOT subset of CPP |
| chr16 | 2049640   | A | G     | A,G     | Heterozygous CTC NOT subset of CPP |
| chr16 | 2052340   | G | G     | A,G     | Heterozygous CTC NOT subset of CPP |
| chr16 | 2222286   | C | C     | C,T     | Heterozygous CTC NOT subset of CPP |
| chr16 | 2225614   | G | G     | A,G     | Heterozygous CTC NOT subset of CPP |
| chr16 | 2301520   | G | G     | C,G     | Heterozygous CTC NOT subset of CPP |
| chr16 | 3724465   | G | G     | C,G     | Heterozygous CTC NOT subset of CPP |
| chr16 | 4308069   | C | C     | C,T     | Heterozygous CTC NOT subset of CPP |
| chr16 | 4310468   | C | C     | C,G     | Heterozygous CTC NOT subset of CPP |
| chr16 | 4723576   | G | G     | G,T     | Heterozygous CTC NOT subset of CPP |
| chr16 | 4855279   | A | G     | A,G     | Heterozygous CTC NOT subset of CPP |
| chr16 | 11642910  | T | T     | +A,T    | Heterozygous CTC NOT subset of CPP |
| chr16 | 11647492  | T | T     | C,T     | Heterozygous CTC NOT subset of CPP |
| chr16 | 11647532  | C | C     | C,T     | Heterozygous CTC NOT subset of CPP |
| chr16 | 12009614  | G | A     | A,G     | Heterozygous CTC NOT subset of CPP |
| chr16 | 12009781  | G | A     | A,G     | Heterozygous CTC NOT subset of CPP |
| chr16 | 14738341  | C | C     | C,T     | Heterozygous CTC NOT subset of CPP |
| chr16 | 15095675  | C | C     | A,C     | Heterozygous CTC NOT subset of CPP |
| chr16 | 18799392  | A | A,C,T | A,C,G,T | Heterozygous CTC NOT subset of CPP |
| chr16 | 20748331  | C | C     | A,C     | Heterozygous CTC NOT subset of CPP |
| chr16 | 24582299  | C | C     | C,G     | Heterozygous CTC NOT subset of CPP |
| chr16 | 29994922  | C | C     | T       | Heterozygous CTC NOT subset of CPP |
| chr16 | 30078686  | T | T     | +G,T    | Heterozygous CTC NOT subset of CPP |
| chr16 | 30078689  | T | A     | A,G     | Heterozygous CTC NOT subset of CPP |
| chr16 | 30078690  | G | G     | A,G     | Heterozygous CTC NOT subset of CPP |
| chr16 | 30376486  | T | T     | C,T     | Heterozygous CTC NOT subset of CPP |
| chr16 | 53504687  | G | G     | A,G     | Heterozygous CTC NOT subset of CPP |



Grillet et al., Supplementary Table 5

|       |          |   |     |        |                                    |
|-------|----------|---|-----|--------|------------------------------------|
| chr16 | 57689385 | C | G   | C,G    | Heterozygous CTC NOT subset of CPP |
| chr16 | 57689805 | A | A   | A,C    | Heterozygous CTC NOT subset of CPP |
| chr16 | 57697532 | T | G   | G,T    | Heterozygous CTC NOT subset of CPP |
| chr16 | 58549932 | T | C   | C,T    | Heterozygous CTC NOT subset of CPP |
| chr16 | 58550484 | G | G   | A,G    | Heterozygous CTC NOT subset of CPP |
| chr16 | 58557342 | G | G   | A,G    | Heterozygous CTC NOT subset of CPP |
| chr16 | 58616984 | T | T   | C,T    | Heterozygous CTC NOT subset of CPP |
| chr16 | 58616997 | C | C   | C,T    | Heterozygous CTC NOT subset of CPP |
| chr16 | 66860666 | C | C   | C,T    | Heterozygous CTC NOT subset of CPP |
| chr16 | 67478537 | G | G   | A,G    | Heterozygous CTC NOT subset of CPP |
| chr16 | 68265732 | G | G   | A,G    | Heterozygous CTC NOT subset of CPP |
| chr16 | 72135014 | T | C   | C,T    | Heterozygous CTC NOT subset of CPP |
| chr16 | 74497312 | T | T   | C,T    | Heterozygous CTC NOT subset of CPP |
| chr16 | 75269003 | G | G   | A,G    | Heterozygous CTC NOT subset of CPP |
| chr16 | 75269325 | C | C   | C,T    | Heterozygous CTC NOT subset of CPP |
| chr16 | 75690279 | A | A   | A,G    | Heterozygous CTC NOT subset of CPP |
| chr16 | 81010073 | C | C   | C,T    | Heterozygous CTC NOT subset of CPP |
| chr16 | 84100173 | C | C   | C,T    | Heterozygous CTC NOT subset of CPP |
| chr16 | 85682289 | A | A   | +C,A   | Heterozygous CTC NOT subset of CPP |
| chr16 | 88644005 | A | G   | A,G    | Heterozygous CTC NOT subset of CPP |
| chr16 | 88719745 | G | G   | A,G    | Heterozygous CTC NOT subset of CPP |
| chr16 | 88724347 | G | T   | G,T    | Heterozygous CTC NOT subset of CPP |
| chr16 | 88783289 | G | G   | A,G    | Heterozygous CTC NOT subset of CPP |
| chr16 | 88786063 | C | C   | C,T    | Heterozygous CTC NOT subset of CPP |
| chr16 | 88787610 | T | T   | C,T    | Heterozygous CTC NOT subset of CPP |
| chr16 | 88787704 | G | C   | C,G    | Heterozygous CTC NOT subset of CPP |
| chr16 | 88792047 | A | G   | A,G    | Heterozygous CTC NOT subset of CPP |
| chr16 | 88801402 | C | C   | C,T    | Heterozygous CTC NOT subset of CPP |
| chr16 | 88802748 | C | T   | C      | Heterozygous CTC NOT subset of CPP |
| chr16 | 88804349 | G | G   | G,T    | Heterozygous CTC NOT subset of CPP |
| chr16 | 88804734 | A | G   | A,G    | Heterozygous CTC NOT subset of CPP |
| chr16 | 88807896 | G | G   | A,G    | Heterozygous CTC NOT subset of CPP |
| chr16 | 88808743 | A | G   | A,G    | Heterozygous CTC NOT subset of CPP |
| chr16 | 88871908 | A | A   | A,G    | Heterozygous CTC NOT subset of CPP |
| chr16 | 88872229 | A | A   | A,G    | Heterozygous CTC NOT subset of CPP |
| chr16 | 88873790 | C | C   | C,T    | Heterozygous CTC NOT subset of CPP |
| chr16 | 88874632 | C | C   | C,G    | Heterozygous CTC NOT subset of CPP |
| chr16 | 88874729 | C | C   | C,G    | Heterozygous CTC NOT subset of CPP |
| chr16 | 88875928 | T | T   | C,T    | Heterozygous CTC NOT subset of CPP |
| chr16 | 89620328 | G | G   | A,G    | Heterozygous CTC NOT subset of CPP |
| chr16 | 89627460 | T | T   | G,T    | Heterozygous CTC NOT subset of CPP |
| chr16 | 89627671 | C | C   | C,T    | Heterozygous CTC NOT subset of CPP |
| chr16 | 89836323 | C | C   | C,T    | Heterozygous CTC NOT subset of CPP |
| chr16 | 89965055 | G | G   | A,G    | Heterozygous CTC NOT subset of CPP |
| chr17 | 16342730 | T | A,T | -T,A,T | Heterozygous CTC NOT subset of CPP |
| chr17 | 26955330 | A | A   | A,C    | Heterozygous CTC NOT subset of CPP |

Grillet et al., Supplementary Table 5

|       |          |   |      |        |                                    |
|-------|----------|---|------|--------|------------------------------------|
| chr17 | 27014396 | C | C    | C,T    | Heterozygous CTC NOT subset of CPP |
| chr17 | 27014483 | C | C    | A,C    | Heterozygous CTC NOT subset of CPP |
| chr17 | 27052358 | C | C    | C,T    | Heterozygous CTC NOT subset of CPP |
| chr17 | 27904711 | G | G    | A,G    | Heterozygous CTC NOT subset of CPP |
| chr17 | 30222002 | T | C    | C,T    | Heterozygous CTC NOT subset of CPP |
| chr17 | 30678808 | T | T    | C,T    | Heterozygous CTC NOT subset of CPP |
| chr17 | 31065385 | C | C    | C,T    | Heterozygous CTC NOT subset of CPP |
| chr17 | 34151135 | T | T    | C,T    | Heterozygous CTC NOT subset of CPP |
| chr17 | 34871721 | T | C    | T      | Heterozygous CTC NOT subset of CPP |
| chr17 | 34871813 | T | T    | C,T    | Heterozygous CTC NOT subset of CPP |
| chr17 | 34942595 | G | G    | A,G    | Heterozygous CTC NOT subset of CPP |
| chr17 | 36830459 | G | A    | G      | Heterozygous CTC NOT subset of CPP |
| chr17 | 36889559 | C | C    | C,T    | Heterozygous CTC NOT subset of CPP |
| chr17 | 36909499 | A | A    | A,T    | Heterozygous CTC NOT subset of CPP |
| chr17 | 36926731 | T | T    | G,T    | Heterozygous CTC NOT subset of CPP |
| chr17 | 36926767 | G | G    | A,G    | Heterozygous CTC NOT subset of CPP |
| chr17 | 37054772 | C | C    | C,T    | Heterozygous CTC NOT subset of CPP |
| chr17 | 37070658 | A | G    | A,G    | Heterozygous CTC NOT subset of CPP |
| chr17 | 37075080 | C | C    | C,T    | Heterozygous CTC NOT subset of CPP |
| chr17 | 37076331 | G | A    | A,G    | Heterozygous CTC NOT subset of CPP |
| chr17 | 37884037 | C | G    | C,G    | Heterozygous CTC NOT subset of CPP |
| chr17 | 38975194 | A | A    | A,C    | Heterozygous CTC NOT subset of CPP |
| chr17 | 39681475 | A | A    | A,G    | Heterozygous CTC NOT subset of CPP |
| chr17 | 39684321 | G | G    | C,G    | Heterozygous CTC NOT subset of CPP |
| chr17 | 39684410 | G | G    | A,G    | Heterozygous CTC NOT subset of CPP |
| chr17 | 39912145 | T | A    | A,T    | Heterozygous CTC NOT subset of CPP |
| chr17 | 40722029 | A | A    | A,G    | Heterozygous CTC NOT subset of CPP |
| chr17 | 41154902 | A | A    | A,C,G  | Heterozygous CTC NOT subset of CPP |
| chr17 | 42153635 | A | A    | A,G    | Heterozygous CTC NOT subset of CPP |
| chr17 | 42427630 | T | T    | C,T    | Heterozygous CTC NOT subset of CPP |
| chr17 | 43192549 | T | +C,T | +C,C,T | Heterozygous CTC NOT subset of CPP |
| chr17 | 43192821 | A | G    | A,G    | Heterozygous CTC NOT subset of CPP |
| chr17 | 45000565 | C | C    | A,C    | Heterozygous CTC NOT subset of CPP |
| chr17 | 45735975 | G | G    | A,G    | Heterozygous CTC NOT subset of CPP |
| chr17 | 45750468 | T | T    | C,T    | Heterozygous CTC NOT subset of CPP |
| chr17 | 46690777 | A | A    | A,G    | Heterozygous CTC NOT subset of CPP |
| chr17 | 47783663 | C | C    | C,T    | Heterozygous CTC NOT subset of CPP |
| chr17 | 48940635 | C | C    | +T,C   | Heterozygous CTC NOT subset of CPP |
| chr17 | 49338275 | G | G    | A,G    | Heterozygous CTC NOT subset of CPP |
| chr17 | 56056550 | C | C    | C,G    | Heterozygous CTC NOT subset of CPP |
| chr17 | 56438301 | G | G    | A,G    | Heterozygous CTC NOT subset of CPP |
| chr17 | 56448297 | C | C    | C,T    | Heterozygous CTC NOT subset of CPP |
| chr17 | 56492800 | T | T    | C,T    | Heterozygous CTC NOT subset of CPP |
| chr17 | 61655937 | G | G    | A,G    | Heterozygous CTC NOT subset of CPP |
| chr17 | 61908556 | C | C    | C,T    | Heterozygous CTC NOT subset of CPP |
| chr17 | 62499163 | C | C    | C,T    | Heterozygous CTC NOT subset of CPP |

Grillet et al., Supplementary Table 5

|       |          |   |      |        |                                    |
|-------|----------|---|------|--------|------------------------------------|
| chr17 | 65732093 | A | A    | A,G    | Heterozygous CTC NOT subset of CPP |
| chr17 | 65905758 | C | C    | +A,C   | Heterozygous CTC NOT subset of CPP |
| chr17 | 73702135 | G | G    | A,G    | Heterozygous CTC NOT subset of CPP |
| chr17 | 73748558 | C | T    | C      | Heterozygous CTC NOT subset of CPP |
| chr17 | 74394934 | G | G    | A,G    | Heterozygous CTC NOT subset of CPP |
| chr17 | 77984141 | C | C    | C,T    | Heterozygous CTC NOT subset of CPP |
| chr17 | 79213141 | C | C    | C,T    | Heterozygous CTC NOT subset of CPP |
| chr17 | 79226362 | G | G    | A,G    | Heterozygous CTC NOT subset of CPP |
| chr17 | 79479256 | A | +C,G | +C,A,G | Heterozygous CTC NOT subset of CPP |
| chr17 | 79564304 | G | G    | G,T    | Heterozygous CTC NOT subset of CPP |
| chr17 | 79634774 | A | A    | A,T    | Heterozygous CTC NOT subset of CPP |
| chr17 | 79637367 | C | C    | C,G    | Heterozygous CTC NOT subset of CPP |
| chr17 | 79638805 | C | C    | C,T    | Heterozygous CTC NOT subset of CPP |
| chr17 | 79663931 | T | T    | C,T    | Heterozygous CTC NOT subset of CPP |
| chr17 | 79682051 | C | C    | C,T    | Heterozygous CTC NOT subset of CPP |
| chr17 | 79846024 | G | C    | C,G    | Heterozygous CTC NOT subset of CPP |
| chr17 | 79872517 | G | G    | A,G    | Heterozygous CTC NOT subset of CPP |
| chr17 | 79994115 | G | G    | -G,G   | Heterozygous CTC NOT subset of CPP |
| chr17 | 80045086 | G | G    | C,G    | Heterozygous CTC NOT subset of CPP |
| chr17 | 80544018 | C | C    | C,T    | Heterozygous CTC NOT subset of CPP |
| chr18 | 12057314 | A | A    | A,C,G  | Heterozygous CTC NOT subset of CPP |
| chr19 | 652238   | A | G    | A,G    | Heterozygous CTC NOT subset of CPP |
| chr19 | 756985   | T | T    | G,T    | Heterozygous CTC NOT subset of CPP |
| chr19 | 885818   | A | G    | A,G    | Heterozygous CTC NOT subset of CPP |
| chr19 | 1010691  | A | A    | A,G    | Heterozygous CTC NOT subset of CPP |
| chr19 | 1032689  | G | G    | G,T    | Heterozygous CTC NOT subset of CPP |
| chr19 | 1036456  | C | C    | C,G    | Heterozygous CTC NOT subset of CPP |
| chr19 | 1036468  | A | A    | A,G    | Heterozygous CTC NOT subset of CPP |
| chr19 | 1556200  | C | C    | A,C    | Heterozygous CTC NOT subset of CPP |
| chr19 | 1625622  | G | G    | A,G    | Heterozygous CTC NOT subset of CPP |
| chr19 | 1986520  | G | G    | A,G    | Heterozygous CTC NOT subset of CPP |
| chr19 | 2226676  | G | G    | A,G    | Heterozygous CTC NOT subset of CPP |
| chr19 | 2328730  | G | G    | G,T    | Heterozygous CTC NOT subset of CPP |
| chr19 | 2794834  | C | C    | C,T    | Heterozygous CTC NOT subset of CPP |
| chr19 | 3119239  | C | T    | C,T    | Heterozygous CTC NOT subset of CPP |
| chr19 | 3186085  | G | T    | G,T    | Heterozygous CTC NOT subset of CPP |
| chr19 | 3207422  | T | T    | C,T    | Heterozygous CTC NOT subset of CPP |
| chr19 | 3207646  | A | A    | A,G    | Heterozygous CTC NOT subset of CPP |
| chr19 | 3207698  | C | C    | C,T    | Heterozygous CTC NOT subset of CPP |
| chr19 | 3977486  | A | G    | A,G    | Heterozygous CTC NOT subset of CPP |
| chr19 | 3979408  | A | G    | A,G    | Heterozygous CTC NOT subset of CPP |
| chr19 | 3982967  | G | G    | A,G    | Heterozygous CTC NOT subset of CPP |
| chr19 | 3983184  | A | A    | A,G    | Heterozygous CTC NOT subset of CPP |
| chr19 | 4117528  | G | G    | A,G    | Heterozygous CTC NOT subset of CPP |
| chr19 | 4325433  | G | A    | A,G    | Heterozygous CTC NOT subset of CPP |
| chr19 | 4454083  | C | C    | C,T    | Heterozygous CTC NOT subset of CPP |

Grillet et al., Supplementary Table 5

|       |          |   |   |      |                                    |
|-------|----------|---|---|------|------------------------------------|
| chr19 | 4852137  | C | C | C,T  | Heterozygous CTC NOT subset of CPP |
| chr19 | 5711930  | C | C | C,T  | Heterozygous CTC NOT subset of CPP |
| chr19 | 6458240  | G | G | C,G  | Heterozygous CTC NOT subset of CPP |
| chr19 | 7678048  | A | A | +G,A | Heterozygous CTC NOT subset of CPP |
| chr19 | 8368971  | C | C | -C,C | Heterozygous CTC NOT subset of CPP |
| chr19 | 8376431  | G | A | A,G  | Heterozygous CTC NOT subset of CPP |
| chr19 | 10225764 | G | G | A,G  | Heterozygous CTC NOT subset of CPP |
| chr19 | 11222300 | G | G | A,G  | Heterozygous CTC NOT subset of CPP |
| chr19 | 12817106 | G | G | C,G  | Heterozygous CTC NOT subset of CPP |
| chr19 | 14038791 | C | C | C,T  | Heterozygous CTC NOT subset of CPP |
| chr19 | 14574959 | G | G | A,G  | Heterozygous CTC NOT subset of CPP |
| chr19 | 14580328 | A | A | A,G  | Heterozygous CTC NOT subset of CPP |
| chr19 | 14589378 | C | C | C,T  | Heterozygous CTC NOT subset of CPP |
| chr19 | 15350594 | G | G | A,G  | Heterozygous CTC NOT subset of CPP |
| chr19 | 17305440 | T | T | C,T  | Heterozygous CTC NOT subset of CPP |
| chr19 | 17351535 | G | G | A,G  | Heterozygous CTC NOT subset of CPP |
| chr19 | 17417080 | C | C | C,T  | Heterozygous CTC NOT subset of CPP |
| chr19 | 17417130 | C | C | C,T  | Heterozygous CTC NOT subset of CPP |
| chr19 | 17622493 | G | G | A,G  | Heterozygous CTC NOT subset of CPP |
| chr19 | 17628587 | A | G | A,G  | Heterozygous CTC NOT subset of CPP |
| chr19 | 18053557 | C | C | C,G  | Heterozygous CTC NOT subset of CPP |
| chr19 | 18285944 | G | G | A,G  | Heterozygous CTC NOT subset of CPP |
| chr19 | 18497141 | T | T | A,T  | Heterozygous CTC NOT subset of CPP |
| chr19 | 18499238 | G | G | G,T  | Heterozygous CTC NOT subset of CPP |
| chr19 | 19011244 | T | C | C,T  | Heterozygous CTC NOT subset of CPP |
| chr19 | 19023853 | T | C | C,T  | Heterozygous CTC NOT subset of CPP |
| chr19 | 19606634 | G | G | A,G  | Heterozygous CTC NOT subset of CPP |
| chr19 | 24010482 | G | G | A,G  | Heterozygous CTC NOT subset of CPP |
| chr19 | 33076729 | C | C | C,T  | Heterozygous CTC NOT subset of CPP |
| chr19 | 35660508 | G | A | A,G  | Heterozygous CTC NOT subset of CPP |
| chr19 | 36486509 | C | C | C,G  | Heterozygous CTC NOT subset of CPP |
| chr19 | 38871622 | C | C | C,T  | Heterozygous CTC NOT subset of CPP |
| chr19 | 39195660 | G | G | -G,G | Heterozygous CTC NOT subset of CPP |
| chr19 | 39308190 | C | C | C,T  | Heterozygous CTC NOT subset of CPP |
| chr19 | 39322414 | G | G | G,T  | Heterozygous CTC NOT subset of CPP |
| chr19 | 39416887 | C | C | C,T  | Heterozygous CTC NOT subset of CPP |
| chr19 | 39923952 | G | G | A,G  | Heterozygous CTC NOT subset of CPP |
| chr19 | 40030704 | C | C | C,T  | Heterozygous CTC NOT subset of CPP |
| chr19 | 41096189 | A | A | A,G  | Heterozygous CTC NOT subset of CPP |
| chr19 | 41785030 | C | C | C,T  | Heterozygous CTC NOT subset of CPP |
| chr19 | 42406127 | C | C | C,T  | Heterozygous CTC NOT subset of CPP |
| chr19 | 42463447 | C | T | C,T  | Heterozygous CTC NOT subset of CPP |
| chr19 | 42753605 | G | G | G,T  | Heterozygous CTC NOT subset of CPP |
| chr19 | 44031324 | C | T | C    | Heterozygous CTC NOT subset of CPP |
| chr19 | 44237563 | G | G | A,G  | Heterozygous CTC NOT subset of CPP |
| chr19 | 45496303 | T | C | C,T  | Heterozygous CTC NOT subset of CPP |

Grillet et al., Supplementary Table 5

|       |          |   |    |      |                                    |
|-------|----------|---|----|------|------------------------------------|
| chr19 | 45912736 | C | C  | A,C  | Heterozygous CTC NOT subset of CPP |
| chr19 | 45923653 | A | G  | A,G  | Heterozygous CTC NOT subset of CPP |
| chr19 | 47223949 | G | G  | A,G  | Heterozygous CTC NOT subset of CPP |
| chr19 | 47278859 | C | C  | C,G  | Heterozygous CTC NOT subset of CPP |
| chr19 | 47549454 | C | C  | C,T  | Heterozygous CTC NOT subset of CPP |
| chr19 | 47569760 | G | G  | A,G  | Heterozygous CTC NOT subset of CPP |
| chr19 | 48258717 | A | G  | A,G  | Heterozygous CTC NOT subset of CPP |
| chr19 | 48622427 | A | A  | A,G  | Heterozygous CTC NOT subset of CPP |
| chr19 | 48654553 | G | G  | G,T  | Heterozygous CTC NOT subset of CPP |
| chr19 | 49377319 | A | G  | A,G  | Heterozygous CTC NOT subset of CPP |
| chr19 | 49377436 | G | C  | C,G  | Heterozygous CTC NOT subset of CPP |
| chr19 | 49378994 | A | G  | A,G  | Heterozygous CTC NOT subset of CPP |
| chr19 | 49414464 | C | C  | C,T  | Heterozygous CTC NOT subset of CPP |
| chr19 | 49469087 | T | T  | C,T  | Heterozygous CTC NOT subset of CPP |
| chr19 | 49490523 | T | T  | C,T  | Heterozygous CTC NOT subset of CPP |
| chr19 | 49845722 | G | G  | A,G  | Heterozygous CTC NOT subset of CPP |
| chr19 | 49852091 | G | G  | A,G  | Heterozygous CTC NOT subset of CPP |
| chr19 | 49949652 | G | A  | A,G  | Heterozygous CTC NOT subset of CPP |
| chr19 | 49950298 | C | T  | C,T  | Heterozygous CTC NOT subset of CPP |
| chr19 | 49950356 | C | G  | C,G  | Heterozygous CTC NOT subset of CPP |
| chr19 | 49954803 | C | T  | C,T  | Heterozygous CTC NOT subset of CPP |
| chr19 | 49954807 | T | G  | G,T  | Heterozygous CTC NOT subset of CPP |
| chr19 | 49962986 | C | C  | C,G  | Heterozygous CTC NOT subset of CPP |
| chr19 | 49967981 | T | G  | G,T  | Heterozygous CTC NOT subset of CPP |
| chr19 | 49969085 | C | T  | C,T  | Heterozygous CTC NOT subset of CPP |
| chr19 | 50156733 | A | A  | A,G  | Heterozygous CTC NOT subset of CPP |
| chr19 | 50189861 | G | -G | -G,G | Heterozygous CTC NOT subset of CPP |
| chr19 | 50335267 | T | T  | A,T  | Heterozygous CTC NOT subset of CPP |
| chr19 | 51850290 | G | A  | A,G  | Heterozygous CTC NOT subset of CPP |
| chr19 | 54652203 | T | C  | C,T  | Heterozygous CTC NOT subset of CPP |
| chr19 | 54697079 | C | T  | C,T  | Heterozygous CTC NOT subset of CPP |
| chr19 | 55624113 | G | G  | A,G  | Heterozygous CTC NOT subset of CPP |
| chr19 | 55628609 | A | A  | A,G  | Heterozygous CTC NOT subset of CPP |
| chr19 | 55756980 | A | A  | A,G  | Heterozygous CTC NOT subset of CPP |
| chr19 | 55790902 | C | C  | C,G  | Heterozygous CTC NOT subset of CPP |
| chr19 | 55895588 | G | G  | A    | Heterozygous CTC NOT subset of CPP |
| chr2  | 277003   | A | A  | A,G  | Heterozygous CTC NOT subset of CPP |
| chr2  | 277314   | G | G  | A,G  | Heterozygous CTC NOT subset of CPP |
| chr2  | 11359120 | G | T  | G    | Heterozygous CTC NOT subset of CPP |
| chr2  | 20240668 | C | C  | A,C  | Heterozygous CTC NOT subset of CPP |
| chr2  | 27424304 | C | C  | C,T  | Heterozygous CTC NOT subset of CPP |
| chr2  | 33809994 | C | C  | A,C  | Heterozygous CTC NOT subset of CPP |
| chr2  | 37505105 | T | T  | G,T  | Heterozygous CTC NOT subset of CPP |
| chr2  | 43452321 | A | A  | A,C  | Heterozygous CTC NOT subset of CPP |
| chr2  | 47596608 | G | G  | C,G  | Heterozygous CTC NOT subset of CPP |
| chr2  | 47596609 | C | C  | C,G  | Heterozygous CTC NOT subset of CPP |

Grillet et al., Supplementary Table 5

|      |           |   |   |      |                                    |
|------|-----------|---|---|------|------------------------------------|
| chr2 | 47607081  | A | A | A,G  | Heterozygous CTC NOT subset of CPP |
| chr2 | 54093956  | G | G | A,G  | Heterozygous CTC NOT subset of CPP |
| chr2 | 54858439  | C | C | C,T  | Heterozygous CTC NOT subset of CPP |
| chr2 | 54858727  | C | C | C,G  | Heterozygous CTC NOT subset of CPP |
| chr2 | 54882291  | C | C | A,C  | Heterozygous CTC NOT subset of CPP |
| chr2 | 55806912  | G | G | A,G  | Heterozygous CTC NOT subset of CPP |
| chr2 | 58388696  | A | G | A,G  | Heterozygous CTC NOT subset of CPP |
| chr2 | 70485320  | C | C | C,T  | Heterozygous CTC NOT subset of CPP |
| chr2 | 71216103  | C | C | A,C  | Heterozygous CTC NOT subset of CPP |
| chr2 | 73461483  | C | C | A,C  | Heterozygous CTC NOT subset of CPP |
| chr2 | 73478461  | A | A | A,T  | Heterozygous CTC NOT subset of CPP |
| chr2 | 74441209  | T | T | C,T  | Heterozygous CTC NOT subset of CPP |
| chr2 | 74648942  | A | A | +G,A | Heterozygous CTC NOT subset of CPP |
| chr2 | 74689293  | C | C | C,T  | Heterozygous CTC NOT subset of CPP |
| chr2 | 95766622  | A | A | A,G  | Heterozygous CTC NOT subset of CPP |
| chr2 | 96951078  | A | A | +C,A | Heterozygous CTC NOT subset of CPP |
| chr2 | 96952833  | A | A | A,G  | Heterozygous CTC NOT subset of CPP |
| chr2 | 97020049  | T | T | C,T  | Heterozygous CTC NOT subset of CPP |
| chr2 | 97030247  | T | T | C,T  | Heterozygous CTC NOT subset of CPP |
| chr2 | 98275354  | G | G | A,G  | Heterozygous CTC NOT subset of CPP |
| chr2 | 102472459 | A | A | A,G  | Heterozygous CTC NOT subset of CPP |
| chr2 | 105977761 | G | G | A,G  | Heterozygous CTC NOT subset of CPP |
| chr2 | 106015412 | G | G | C,G  | Heterozygous CTC NOT subset of CPP |
| chr2 | 113404708 | G | G | A,G  | Heterozygous CTC NOT subset of CPP |
| chr2 | 120980442 | T | T | C,T  | Heterozygous CTC NOT subset of CPP |
| chr2 | 128260445 | A | A | +T,A | Heterozygous CTC NOT subset of CPP |
| chr2 | 128608184 | C | C | C,T  | Heterozygous CTC NOT subset of CPP |
| chr2 | 131096697 | G | G | A,G  | Heterozygous CTC NOT subset of CPP |
| chr2 | 135107400 | A | A | A,G  | Heterozygous CTC NOT subset of CPP |
| chr2 | 160604514 | C | C | C,T  | Heterozygous CTC NOT subset of CPP |
| chr2 | 170678476 | G | G | A,G  | Heterozygous CTC NOT subset of CPP |
| chr2 | 174219617 | T | T | A,T  | Heterozygous CTC NOT subset of CPP |
| chr2 | 174946760 | T | T | C,T  | Heterozygous CTC NOT subset of CPP |
| chr2 | 200820952 | T | T | G,T  | Heterozygous CTC NOT subset of CPP |
| chr2 | 216176824 | C | C | C,T  | Heterozygous CTC NOT subset of CPP |
| chr2 | 220037557 | G | G | A,G  | Heterozygous CTC NOT subset of CPP |
| chr2 | 220251685 | T | T | G,T  | Heterozygous CTC NOT subset of CPP |
| chr2 | 223513514 | G | G | +T,G | Heterozygous CTC NOT subset of CPP |
| chr2 | 223773523 | C | C | C,T  | Heterozygous CTC NOT subset of CPP |
| chr2 | 230668858 | T | T | C,T  | Heterozygous CTC NOT subset of CPP |
| chr2 | 231738168 | G | A | A,G  | Heterozygous CTC NOT subset of CPP |
| chr2 | 231742214 | C | C | C,T  | Heterozygous CTC NOT subset of CPP |
| chr2 | 234758500 | G | G | A,G  | Heterozygous CTC NOT subset of CPP |
| chr2 | 234763137 | T | T | C,T  | Heterozygous CTC NOT subset of CPP |
| chr2 | 235950187 | T | T | C,T  | Heterozygous CTC NOT subset of CPP |
| chr2 | 235951819 | A | A | A,G  | Heterozygous CTC NOT subset of CPP |

Grillet et al., Supplementary Table 5

|       |           |   |   |       |                                    |
|-------|-----------|---|---|-------|------------------------------------|
| chr2  | 239148535 | G | G | C,G   | Heterozygous CTC NOT subset of CPP |
| chr2  | 240961728 | T | C | C,T   | Heterozygous CTC NOT subset of CPP |
| chr20 | 464603    | C | C | C,T   | Heterozygous CTC NOT subset of CPP |
| chr20 | 2638579   | T | T | C,T   | Heterozygous CTC NOT subset of CPP |
| chr20 | 2638882   | T | T | C,T   | Heterozygous CTC NOT subset of CPP |
| chr20 | 3846662   | C | C | C,T   | Heterozygous CTC NOT subset of CPP |
| chr20 | 3870079   | T | T | A,T   | Heterozygous CTC NOT subset of CPP |
| chr20 | 6064710   | A | A | A,G   | Heterozygous CTC NOT subset of CPP |
| chr20 | 6065729   | C | C | C,T   | Heterozygous CTC NOT subset of CPP |
| chr20 | 6065731   | T | T | C,T   | Heterozygous CTC NOT subset of CPP |
| chr20 | 17606220  | C | C | C,T   | Heterozygous CTC NOT subset of CPP |
| chr20 | 17639804  | T | T | C,T   | Heterozygous CTC NOT subset of CPP |
| chr20 | 25398790  | G | A | A,G   | Heterozygous CTC NOT subset of CPP |
| chr20 | 30381758  | G | G | C,G   | Heterozygous CTC NOT subset of CPP |
| chr20 | 30382315  | A | A | A,G   | Heterozygous CTC NOT subset of CPP |
| chr20 | 31427635  | C | C | C,T   | Heterozygous CTC NOT subset of CPP |
| chr20 | 32267636  | C | C | C,T   | Heterozygous CTC NOT subset of CPP |
| chr20 | 32664880  | T | T | C,T   | Heterozygous CTC NOT subset of CPP |
| chr20 | 33867920  | T | T | +C,T  | Heterozygous CTC NOT subset of CPP |
| chr20 | 34828459  | T | T | C,T   | Heterozygous CTC NOT subset of CPP |
| chr20 | 36147572  | T | T | C,T   | Heterozygous CTC NOT subset of CPP |
| chr20 | 37580670  | C | C | C,G   | Heterozygous CTC NOT subset of CPP |
| chr20 | 42089511  | T | C | C,T   | Heterozygous CTC NOT subset of CPP |
| chr20 | 42343821  | C | C | C,G   | Heterozygous CTC NOT subset of CPP |
| chr20 | 44420637  | G | A | G     | Heterozygous CTC NOT subset of CPP |
| chr20 | 44520579  | C | C | C,G   | Heterozygous CTC NOT subset of CPP |
| chr20 | 45318042  | G | G | A,G   | Heterozygous CTC NOT subset of CPP |
| chr20 | 46365571  | A | A | G     | Heterozygous CTC NOT subset of CPP |
| chr20 | 47850206  | C | C | A,C   | Heterozygous CTC NOT subset of CPP |
| chr20 | 54961541  | A | A | A,T   | Heterozygous CTC NOT subset of CPP |
| chr20 | 55088404  | A | G | A,G   | Heterozygous CTC NOT subset of CPP |
| chr20 | 55982813  | G | G | A,G   | Heterozygous CTC NOT subset of CPP |
| chr20 | 57478583  | C | C | C,G   | Heterozygous CTC NOT subset of CPP |
| chr20 | 60893639  | G | G | C,G   | Heterozygous CTC NOT subset of CPP |
| chr20 | 60905878  | A | G | A,G   | Heterozygous CTC NOT subset of CPP |
| chr20 | 60963494  | C | C | C,T   | Heterozygous CTC NOT subset of CPP |
| chr20 | 60963575  | T | T | C,G,T | Heterozygous CTC NOT subset of CPP |
| chr20 | 61472073  | C | C | A,C   | Heterozygous CTC NOT subset of CPP |
| chr20 | 61833718  | G | G | A,G   | Heterozygous CTC NOT subset of CPP |
| chr20 | 61834101  | G | G | A,G   | Heterozygous CTC NOT subset of CPP |
| chr20 | 61907982  | C | C | C,T   | Heterozygous CTC NOT subset of CPP |
| chr20 | 62369997  | C | C | C,T   | Heterozygous CTC NOT subset of CPP |
| chr21 | 34926043  | G | G | A,G   | Heterozygous CTC NOT subset of CPP |
| chr21 | 35281393  | A | G | A,G   | Heterozygous CTC NOT subset of CPP |
| chr21 | 35284683  | A | A | A,G   | Heterozygous CTC NOT subset of CPP |
| chr21 | 38563686  | G | G | C,G   | Heterozygous CTC NOT subset of CPP |

Grillet et al., Supplementary Table 5

|       |          |   |   |        |                                    |
|-------|----------|---|---|--------|------------------------------------|
| chr21 | 44514763 | A | C | A,C    | Heterozygous CTC NOT subset of CPP |
| chr21 | 44514764 | C | T | C,T    | Heterozygous CTC NOT subset of CPP |
| chr21 | 45096206 | G | A | A,G    | Heterozygous CTC NOT subset of CPP |
| chr21 | 45732116 | C | C | C,T    | Heterozygous CTC NOT subset of CPP |
| chr21 | 46271452 | C | T | C,T    | Heterozygous CTC NOT subset of CPP |
| chr21 | 46271460 | T | T | C,T    | Heterozygous CTC NOT subset of CPP |
| chr21 | 47614553 | G | G | A,G    | Heterozygous CTC NOT subset of CPP |
| chr21 | 47635627 | C | C | C,G    | Heterozygous CTC NOT subset of CPP |
| chr22 | 18209920 | C | C | C,T    | Heterozygous CTC NOT subset of CPP |
| chr22 | 19318912 | C | C | C,T    | Heterozygous CTC NOT subset of CPP |
| chr22 | 19868177 | C | C | C,T    | Heterozygous CTC NOT subset of CPP |
| chr22 | 21213380 | C | T | C,T    | Heterozygous CTC NOT subset of CPP |
| chr22 | 21213416 | A | G | A,G    | Heterozygous CTC NOT subset of CPP |
| chr22 | 23631801 | T | T | C,T    | Heterozygous CTC NOT subset of CPP |
| chr22 | 24967972 | C | C | +T,C   | Heterozygous CTC NOT subset of CPP |
| chr22 | 29182184 | C | C | C,G    | Heterozygous CTC NOT subset of CPP |
| chr22 | 29656389 | G | G | G,T    | Heterozygous CTC NOT subset of CPP |
| chr22 | 29688588 | T | T | C,T    | Heterozygous CTC NOT subset of CPP |
| chr22 | 29908072 | C | C | C,T    | Heterozygous CTC NOT subset of CPP |
| chr22 | 29913272 | C | C | C,T    | Heterozygous CTC NOT subset of CPP |
| chr22 | 36684354 | T | T | C,T    | Heterozygous CTC NOT subset of CPP |
| chr22 | 36684358 | C | C | A,C    | Heterozygous CTC NOT subset of CPP |
| chr22 | 36684816 | C | C | C,T    | Heterozygous CTC NOT subset of CPP |
| chr22 | 36715610 | G | G | A,G    | Heterozygous CTC NOT subset of CPP |
| chr22 | 38258976 | G | G | +G,G,T | Heterozygous CTC NOT subset of CPP |
| chr22 | 39712824 | A | A | A,C    | Heterozygous CTC NOT subset of CPP |
| chr22 | 39712844 | T | T | C,T    | Heterozygous CTC NOT subset of CPP |
| chr22 | 41832373 | T | T | G,T    | Heterozygous CTC NOT subset of CPP |
| chr22 | 42033787 | A | A | A,G    | Heterozygous CTC NOT subset of CPP |
| chr22 | 42274034 | G | G | G,T    | Heterozygous CTC NOT subset of CPP |
| chr22 | 43572354 | C | C | C,T    | Heterozygous CTC NOT subset of CPP |
| chr22 | 43576880 | C | C | A,C    | Heterozygous CTC NOT subset of CPP |
| chr22 | 43579049 | T | T | C,T    | Heterozygous CTC NOT subset of CPP |
| chr22 | 43583051 | G | G | A,G    | Heterozygous CTC NOT subset of CPP |
| chr22 | 45221423 | A | A | A,T    | Heterozygous CTC NOT subset of CPP |
| chr22 | 45593055 | G | G | A,G    | Heterozygous CTC NOT subset of CPP |
| chr22 | 50318061 | G | G | C,G    | Heterozygous CTC NOT subset of CPP |
| chr22 | 50637597 | G | G | C,G    | Heterozygous CTC NOT subset of CPP |
| chr22 | 50722134 | T | T | C,T    | Heterozygous CTC NOT subset of CPP |
| chr22 | 50728062 | T | C | C,T    | Heterozygous CTC NOT subset of CPP |
| chr22 | 50885775 | A | G | A,G    | Heterozygous CTC NOT subset of CPP |
| chr3  | 9517577  | C | C | C,T    | Heterozygous CTC NOT subset of CPP |
| chr3  | 9885615  | G | G | C,G    | Heterozygous CTC NOT subset of CPP |
| chr3  | 19992432 | G | G | G,T    | Heterozygous CTC NOT subset of CPP |
| chr3  | 45017782 | A | A | A,G    | Heterozygous CTC NOT subset of CPP |
| chr3  | 45869972 | C | C | C,T    | Heterozygous CTC NOT subset of CPP |



Grillet et al., Supplementary Table 5

|      |           |   |   |        |                                    |
|------|-----------|---|---|--------|------------------------------------|
| chr3 | 47712202  | T | T | C,T    | Heterozygous CTC NOT subset of CPP |
| chr3 | 49394834  | G | G | A,G    | Heterozygous CTC NOT subset of CPP |
| chr3 | 49570200  | C | C | C,T    | Heterozygous CTC NOT subset of CPP |
| chr3 | 49570359  | C | C | C,T    | Heterozygous CTC NOT subset of CPP |
| chr3 | 49570882  | T | C | C,T    | Heterozygous CTC NOT subset of CPP |
| chr3 | 49714225  | T | T | C,T    | Heterozygous CTC NOT subset of CPP |
| chr3 | 50114515  | C | C | C,T    | Heterozygous CTC NOT subset of CPP |
| chr3 | 50144951  | T | T | C,T    | Heterozygous CTC NOT subset of CPP |
| chr3 | 50153356  | T | T | C,T    | Heterozygous CTC NOT subset of CPP |
| chr3 | 52027880  | T | T | -T,T   | Heterozygous CTC NOT subset of CPP |
| chr3 | 52236653  | C | C | C,T    | Heterozygous CTC NOT subset of CPP |
| chr3 | 69127000  | G | G | A,G    | Heterozygous CTC NOT subset of CPP |
| chr3 | 87299075  | A | A | C      | Heterozygous CTC NOT subset of CPP |
| chr3 | 93722607  | C | C | C,T    | Heterozygous CTC NOT subset of CPP |
| chr3 | 98304467  | T | T | C,T    | Heterozygous CTC NOT subset of CPP |
| chr3 | 98541116  | G | G | A,G    | Heterozygous CTC NOT subset of CPP |
| chr3 | 100467018 | T | C | C,T    | Heterozygous CTC NOT subset of CPP |
| chr3 | 101283792 | C | C | C,G    | Heterozygous CTC NOT subset of CPP |
| chr3 | 121414217 | C | C | A,C    | Heterozygous CTC NOT subset of CPP |
| chr3 | 123301148 | G | G | G,T    | Heterozygous CTC NOT subset of CPP |
| chr3 | 123665902 | T | G | G,T    | Heterozygous CTC NOT subset of CPP |
| chr3 | 124458938 | T | T | A,T    | Heterozygous CTC NOT subset of CPP |
| chr3 | 124462824 | A | A | A,G    | Heterozygous CTC NOT subset of CPP |
| chr3 | 124462959 | A | A | A,G    | Heterozygous CTC NOT subset of CPP |
| chr3 | 126722304 | C | C | C,T    | Heterozygous CTC NOT subset of CPP |
| chr3 | 127771382 | G | G | A,G    | Heterozygous CTC NOT subset of CPP |
| chr3 | 128356852 | C | T | C,T    | Heterozygous CTC NOT subset of CPP |
| chr3 | 130672718 | T | T | C,T    | Heterozygous CTC NOT subset of CPP |
| chr3 | 133329943 | G | A | A,G    | Heterozygous CTC NOT subset of CPP |
| chr3 | 133341988 | T | C | C,T    | Heterozygous CTC NOT subset of CPP |
| chr3 | 133368362 | T | G | G,T    | Heterozygous CTC NOT subset of CPP |
| chr3 | 133524717 | G | G | C,G    | Heterozygous CTC NOT subset of CPP |
| chr3 | 149629805 | G | G | A,G    | Heterozygous CTC NOT subset of CPP |
| chr3 | 150280445 | C | C | C,G    | Heterozygous CTC NOT subset of CPP |
| chr3 | 156877707 | A | A | A,T    | Heterozygous CTC NOT subset of CPP |
| chr3 | 160956548 | A | A | A,G    | Heterozygous CTC NOT subset of CPP |
| chr3 | 169700647 | C | C | +A,C   | Heterozygous CTC NOT subset of CPP |
| chr3 | 176767785 | A | A | +A,A,T | Heterozygous CTC NOT subset of CPP |
| chr3 | 179298737 | G | G | G,T    | Heterozygous CTC NOT subset of CPP |
| chr3 | 179298757 | A | A | A,T    | Heterozygous CTC NOT subset of CPP |
| chr3 | 179306679 | T | T | C,T    | Heterozygous CTC NOT subset of CPP |
| chr3 | 183901281 | G | G | A,G    | Heterozygous CTC NOT subset of CPP |
| chr3 | 183976108 | T | T | C,T    | Heterozygous CTC NOT subset of CPP |
| chr3 | 184019681 | G | G | A,G    | Heterozygous CTC NOT subset of CPP |
| chr3 | 194180647 | A | A | A,G    | Heterozygous CTC NOT subset of CPP |
| chr3 | 195594805 | A | G | A      | Heterozygous CTC NOT subset of CPP |

Grillet et al., Supplementary Table 5

|      |           |   |   |       |                                    |
|------|-----------|---|---|-------|------------------------------------|
| chr3 | 195594950 | G | A | G     | Heterozygous CTC NOT subset of CPP |
| chr3 | 196771554 | T | T | C,T   | Heterozygous CTC NOT subset of CPP |
| chr4 | 1018705   | C | C | A,C   | Heterozygous CTC NOT subset of CPP |
| chr4 | 1701317   | G | G | A,G   | Heterozygous CTC NOT subset of CPP |
| chr4 | 1729556   | G | G | A,G   | Heterozygous CTC NOT subset of CPP |
| chr4 | 1730215   | C | C | C,G   | Heterozygous CTC NOT subset of CPP |
| chr4 | 1737502   | C | C | C,T   | Heterozygous CTC NOT subset of CPP |
| chr4 | 1843324   | C | C | C,T   | Heterozygous CTC NOT subset of CPP |
| chr4 | 2743999   | A | G | A,G   | Heterozygous CTC NOT subset of CPP |
| chr4 | 2940026   | T | T | C,T   | Heterozygous CTC NOT subset of CPP |
| chr4 | 3514689   | T | T | C,T   | Heterozygous CTC NOT subset of CPP |
| chr4 | 10099340  | T | C | C,T   | Heterozygous CTC NOT subset of CPP |
| chr4 | 17586703  | T | C | C,T   | Heterozygous CTC NOT subset of CPP |
| chr4 | 17829990  | G | G | C,G   | Heterozygous CTC NOT subset of CPP |
| chr4 | 37847277  | C | C | A,C   | Heterozygous CTC NOT subset of CPP |
| chr4 | 39510264  | A | A | A,G   | Heterozygous CTC NOT subset of CPP |
| chr4 | 39515736  | A | A | A,G   | Heterozygous CTC NOT subset of CPP |
| chr4 | 39921942  | A | G | A,G   | Heterozygous CTC NOT subset of CPP |
| chr4 | 56291621  | A | A | -AA,A | Heterozygous CTC NOT subset of CPP |
| chr4 | 57333822  | G | G | G,T   | Heterozygous CTC NOT subset of CPP |
| chr4 | 57887150  | C | C | C,T   | Heterozygous CTC NOT subset of CPP |
| chr4 | 68500171  | A | A | A,G   | Heterozygous CTC NOT subset of CPP |
| chr4 | 68534392  | C | C | C,T   | Heterozygous CTC NOT subset of CPP |
| chr4 | 73956736  | G | G | A,G   | Heterozygous CTC NOT subset of CPP |
| chr4 | 76878688  | G | G | A,G   | Heterozygous CTC NOT subset of CPP |
| chr4 | 95496882  | C | C | C,T   | Heterozygous CTC NOT subset of CPP |
| chr4 | 106317429 | C | G | C,G   | Heterozygous CTC NOT subset of CPP |
| chr4 | 106359122 | G | G | A,G   | Heterozygous CTC NOT subset of CPP |
| chr4 | 107246190 | G | G | C,G   | Heterozygous CTC NOT subset of CPP |
| chr4 | 108641317 | G | G | A,G   | Heterozygous CTC NOT subset of CPP |
| chr4 | 122739985 | T | T | C,T   | Heterozygous CTC NOT subset of CPP |
| chr4 | 174090004 | G | A | A,G   | Heterozygous CTC NOT subset of CPP |
| chr4 | 183815688 | A | G | A,G   | Heterozygous CTC NOT subset of CPP |
| chr4 | 185637604 | G | G | A,G   | Heterozygous CTC NOT subset of CPP |
| chr4 | 185637605 | G | G | A,G   | Heterozygous CTC NOT subset of CPP |
| chr4 | 190864371 | G | G | A,G   | Heterozygous CTC NOT subset of CPP |
| chr4 | 190874255 | A | A | A,T   | Heterozygous CTC NOT subset of CPP |
| chr5 | 914664    | T | T | C,T   | Heterozygous CTC NOT subset of CPP |
| chr5 | 6377293   | C | C | C,T   | Heterozygous CTC NOT subset of CPP |
| chr5 | 6600150   | G | G | A,G   | Heterozygous CTC NOT subset of CPP |
| chr5 | 6633042   | C | C | C,T   | Heterozygous CTC NOT subset of CPP |
| chr5 | 6652009   | G | G | A,G   | Heterozygous CTC NOT subset of CPP |
| chr5 | 7870973   | A | A | A,G   | Heterozygous CTC NOT subset of CPP |
| chr5 | 10250430  | G | A | A,G   | Heterozygous CTC NOT subset of CPP |
| chr5 | 10250443  | T | C | C,T   | Heterozygous CTC NOT subset of CPP |
| chr5 | 10254817  | A | G | A,G   | Heterozygous CTC NOT subset of CPP |

Grillet et al., Supplementary Table 5

|      |           |   |       |           |                                    |
|------|-----------|---|-------|-----------|------------------------------------|
| chr5 | 10256161  | T | C     | C,T       | Heterozygous CTC NOT subset of CPP |
| chr5 | 10414545  | A | A     | +A,A,G    | Heterozygous CTC NOT subset of CPP |
| chr5 | 10681110  | A | A     | A,G       | Heterozygous CTC NOT subset of CPP |
| chr5 | 16794763  | G | G     | A,G       | Heterozygous CTC NOT subset of CPP |
| chr5 | 31410923  | G | G     | A,G       | Heterozygous CTC NOT subset of CPP |
| chr5 | 52942197  | A | G     | A,G       | Heterozygous CTC NOT subset of CPP |
| chr5 | 56526783  | G | A     | A,G       | Heterozygous CTC NOT subset of CPP |
| chr5 | 65118738  | C | C     | C,T       | Heterozygous CTC NOT subset of CPP |
| chr5 | 72204773  | C | C     | +A,C      | Heterozygous CTC NOT subset of CPP |
| chr5 | 72874907  | A | A     | A,C       | Heterozygous CTC NOT subset of CPP |
| chr5 | 73985215  | A | A     | A,G       | Heterozygous CTC NOT subset of CPP |
| chr5 | 74656175  | G | G     | A,G       | Heterozygous CTC NOT subset of CPP |
| chr5 | 77425099  | G | G     | A,G       | Heterozygous CTC NOT subset of CPP |
| chr5 | 79439630  | G | G     | A,G       | Heterozygous CTC NOT subset of CPP |
| chr5 | 79950724  | G | G     | C,G       | Heterozygous CTC NOT subset of CPP |
| chr5 | 94826655  | C | C     | A,C       | Heterozygous CTC NOT subset of CPP |
| chr5 | 95084131  | G | G     | A,G       | Heterozygous CTC NOT subset of CPP |
| chr5 | 95091194  | C | C     | C,T       | Heterozygous CTC NOT subset of CPP |
| chr5 | 95091201  | A | A     | A,G       | Heterozygous CTC NOT subset of CPP |
| chr5 | 98199204  | C | C     | C,T       | Heterozygous CTC NOT subset of CPP |
| chr5 | 112197082 | C | C     | C,T       | Heterozygous CTC NOT subset of CPP |
| chr5 | 126140540 | G | G     | A,G       | Heterozygous CTC NOT subset of CPP |
| chr5 | 126869478 | A | A     | +G,A      | Heterozygous CTC NOT subset of CPP |
| chr5 | 128430757 | T | C     | T         | Heterozygous CTC NOT subset of CPP |
| chr5 | 130500842 | A | A     | A,G       | Heterozygous CTC NOT subset of CPP |
| chr5 | 132437531 | C | C     | C,T       | Heterozygous CTC NOT subset of CPP |
| chr5 | 135382989 | G | G     | C,G       | Heterozygous CTC NOT subset of CPP |
| chr5 | 137708434 | C | T     | C,T       | Heterozygous CTC NOT subset of CPP |
| chr5 | 137754695 | T | C     | C,T       | Heterozygous CTC NOT subset of CPP |
| chr5 | 137892187 | G | G     | A,G       | Heterozygous CTC NOT subset of CPP |
| chr5 | 138643173 | G | G     | A,G       | Heterozygous CTC NOT subset of CPP |
| chr5 | 139574050 | G | G     | A,G       | Heterozygous CTC NOT subset of CPP |
| chr5 | 139936760 | G | T     | G,T       | Heterozygous CTC NOT subset of CPP |
| chr5 | 140048209 | T | T     | C,T       | Heterozygous CTC NOT subset of CPP |
| chr5 | 140699057 | G | G     | C,G       | Heterozygous CTC NOT subset of CPP |
| chr5 | 149772280 | C | C     | C,G       | Heterozygous CTC NOT subset of CPP |
| chr5 | 150425467 | G | G     | A,G       | Heterozygous CTC NOT subset of CPP |
| chr5 | 150436503 | G | G     | C,G       | Heterozygous CTC NOT subset of CPP |
| chr5 | 162909687 | G | G     | A,G       | Heterozygous CTC NOT subset of CPP |
| chr5 | 167835539 | C | C     | C,T       | Heterozygous CTC NOT subset of CPP |
| chr5 | 167937607 | G | G     | A,G       | Heterozygous CTC NOT subset of CPP |
| chr5 | 174936038 | A | A     | A,G       | Heterozygous CTC NOT subset of CPP |
| chr5 | 175811094 | C | +GT,C | +AT,+GT,C | Heterozygous CTC NOT subset of CPP |
| chr5 | 175957139 | C | C     | C,G       | Heterozygous CTC NOT subset of CPP |
| chr5 | 176517797 | C | T     | C,T       | Heterozygous CTC NOT subset of CPP |
| chr5 | 176940081 | C | C     | T         | Heterozygous CTC NOT subset of CPP |

Grillet et al., Supplementary Table 5

|      |           |   |     |      |                                    |
|------|-----------|---|-----|------|------------------------------------|
| chr5 | 177483115 | A | A   | A,G  | Heterozygous CTC NOT subset of CPP |
| chr5 | 179264731 | T | C   | C,T  | Heterozygous CTC NOT subset of CPP |
| chr5 | 179290845 | T | G   | G,T  | Heterozygous CTC NOT subset of CPP |
| chr5 | 180651619 | T | T   | C,T  | Heterozygous CTC NOT subset of CPP |
| chr6 | 7910865   | G | G   | A,G  | Heterozygous CTC NOT subset of CPP |
| chr6 | 17665479  | G | G   | C,G  | Heterozygous CTC NOT subset of CPP |
| chr6 | 17688798  | G | A   | A,G  | Heterozygous CTC NOT subset of CPP |
| chr6 | 24403455  | C | C   | C,T  | Heterozygous CTC NOT subset of CPP |
| chr6 | 26598188  | A | A   | A,G  | Heterozygous CTC NOT subset of CPP |
| chr6 | 26598798  | G | G   | A,G  | Heterozygous CTC NOT subset of CPP |
| chr6 | 29910358  | C | G   | C,G  | Heterozygous CTC NOT subset of CPP |
| chr6 | 29910663  | G | G   | A,G  | Heterozygous CTC NOT subset of CPP |
| chr6 | 29911086  | T | T   | C,T  | Heterozygous CTC NOT subset of CPP |
| chr6 | 29911190  | G | G   | A,G  | Heterozygous CTC NOT subset of CPP |
| chr6 | 29912368  | C | T   | C,T  | Heterozygous CTC NOT subset of CPP |
| chr6 | 30313340  | G | G   | C,G  | Heterozygous CTC NOT subset of CPP |
| chr6 | 30459319  | G | G   | G,T  | Heterozygous CTC NOT subset of CPP |
| chr6 | 30459352  | A | A   | A,G  | Heterozygous CTC NOT subset of CPP |
| chr6 | 30622594  | C | C   | C,G  | Heterozygous CTC NOT subset of CPP |
| chr6 | 30857072  | G | G   | C,G  | Heterozygous CTC NOT subset of CPP |
| chr6 | 30858857  | C | C   | C,T  | Heterozygous CTC NOT subset of CPP |
| chr6 | 30864829  | T | T   | C,T  | Heterozygous CTC NOT subset of CPP |
| chr6 | 30865204  | A | A   | A,C  | Heterozygous CTC NOT subset of CPP |
| chr6 | 30865372  | C | C   | C,T  | Heterozygous CTC NOT subset of CPP |
| chr6 | 31122330  | G | G   | A,G  | Heterozygous CTC NOT subset of CPP |
| chr6 | 31237842  | T | T   | C,T  | Heterozygous CTC NOT subset of CPP |
| chr6 | 31238135  | G | G   | A    | Heterozygous CTC NOT subset of CPP |
| chr6 | 31238138  | C | C   | T    | Heterozygous CTC NOT subset of CPP |
| chr6 | 31238204  | C | C   | C,T  | Heterozygous CTC NOT subset of CPP |
| chr6 | 31238210  | G | G   | A,G  | Heterozygous CTC NOT subset of CPP |
| chr6 | 31239101  | G | G,T | A    | Heterozygous CTC NOT subset of CPP |
| chr6 | 31323254  | G | G   | C,G  | Heterozygous CTC NOT subset of CPP |
| chr6 | 31323262  | G | G   | A,G  | Heterozygous CTC NOT subset of CPP |
| chr6 | 31324104  | G | G   | A    | Heterozygous CTC NOT subset of CPP |
| chr6 | 31498203  | C | C   | A,C  | Heterozygous CTC NOT subset of CPP |
| chr6 | 31748344  | A | A   | +C,A | Heterozygous CTC NOT subset of CPP |
| chr6 | 31795550  | C | C   | C,T  | Heterozygous CTC NOT subset of CPP |
| chr6 | 31795745  | G | G   | A,G  | Heterozygous CTC NOT subset of CPP |
| chr6 | 32088854  | G | G   | C,G  | Heterozygous CTC NOT subset of CPP |
| chr6 | 33169895  | C | C   | C,G  | Heterozygous CTC NOT subset of CPP |
| chr6 | 33239869  | C | C   | T    | Heterozygous CTC NOT subset of CPP |
| chr6 | 33254665  | A | A   | A,G  | Heterozygous CTC NOT subset of CPP |
| chr6 | 33256397  | G | G   | A,G  | Heterozygous CTC NOT subset of CPP |
| chr6 | 33756532  | G | G   | A,G  | Heterozygous CTC NOT subset of CPP |
| chr6 | 35391787  | C | T   | C,T  | Heterozygous CTC NOT subset of CPP |
| chr6 | 35437295  | T | T   | C,T  | Heterozygous CTC NOT subset of CPP |

Grillet et al., Supplementary Table 5

|      |           |   |   |      |                                    |
|------|-----------|---|---|------|------------------------------------|
| chr6 | 42906384  | G | G | G,T  | Heterozygous CTC NOT subset of CPP |
| chr6 | 43193877  | G | G | A,G  | Heterozygous CTC NOT subset of CPP |
| chr6 | 43496662  | A | C | A,C  | Heterozygous CTC NOT subset of CPP |
| chr6 | 111214229 | C | C | C,T  | Heterozygous CTC NOT subset of CPP |
| chr6 | 116579919 | A | A | A,G  | Heterozygous CTC NOT subset of CPP |
| chr7 | 796430    | C | C | C,T  | Heterozygous CTC NOT subset of CPP |
| chr7 | 814788    | G | A | A,G  | Heterozygous CTC NOT subset of CPP |
| chr7 | 2577781   | T | T | C,T  | Heterozygous CTC NOT subset of CPP |
| chr7 | 2578237   | T | T | C,T  | Heterozygous CTC NOT subset of CPP |
| chr7 | 5391702   | C | C | C,G  | Heterozygous CTC NOT subset of CPP |
| chr7 | 5396715   | T | T | C,T  | Heterozygous CTC NOT subset of CPP |
| chr7 | 5417093   | G | G | G,T  | Heterozygous CTC NOT subset of CPP |
| chr7 | 5427517   | G | G | A,G  | Heterozygous CTC NOT subset of CPP |
| chr7 | 5567400   | G | G | A,G  | Heterozygous CTC NOT subset of CPP |
| chr7 | 6048973   | C | C | A,C  | Heterozygous CTC NOT subset of CPP |
| chr7 | 23347509  | G | G | A,G  | Heterozygous CTC NOT subset of CPP |
| chr7 | 26246123  | T | T | G,T  | Heterozygous CTC NOT subset of CPP |
| chr7 | 27702390  | C | C | A,C  | Heterozygous CTC NOT subset of CPP |
| chr7 | 30634661  | C | G | C,G  | Heterozygous CTC NOT subset of CPP |
| chr7 | 33075587  | G | G | -G,G | Heterozygous CTC NOT subset of CPP |
| chr7 | 38829465  | C | C | C,T  | Heterozygous CTC NOT subset of CPP |
| chr7 | 44797545  | G | G | A,G  | Heterozygous CTC NOT subset of CPP |
| chr7 | 45104131  | G | G | A,G  | Heterozygous CTC NOT subset of CPP |
| chr7 | 56136194  | C | T | C,T  | Heterozygous CTC NOT subset of CPP |
| chr7 | 56174115  | A | A | A,C  | Heterozygous CTC NOT subset of CPP |
| chr7 | 56174140  | G | G | G,T  | Heterozygous CTC NOT subset of CPP |
| chr7 | 75609677  | A | G | A,G  | Heterozygous CTC NOT subset of CPP |
| chr7 | 75615006  | C | C | C,T  | Heterozygous CTC NOT subset of CPP |
| chr7 | 75659815  | T | C | C,T  | Heterozygous CTC NOT subset of CPP |
| chr7 | 75677504  | C | C | C,T  | Heterozygous CTC NOT subset of CPP |
| chr7 | 75932306  | G | G | A,G  | Heterozygous CTC NOT subset of CPP |
| chr7 | 90042176  | C | C | C,T  | Heterozygous CTC NOT subset of CPP |
| chr7 | 92077080  | A | A | A,T  | Heterozygous CTC NOT subset of CPP |
| chr7 | 92085763  | C | C | C,T  | Heterozygous CTC NOT subset of CPP |
| chr7 | 95034775  | G | G | C,G  | Heterozygous CTC NOT subset of CPP |
| chr7 | 95041016  | G | G | C,G  | Heterozygous CTC NOT subset of CPP |
| chr7 | 97823629  | A | A | A,G  | Heterozygous CTC NOT subset of CPP |
| chr7 | 98650051  | G | G | C,G  | Heterozygous CTC NOT subset of CPP |
| chr7 | 99621409  | C | C | A,C  | Heterozygous CTC NOT subset of CPP |
| chr7 | 99693749  | T | T | A,T  | Heterozygous CTC NOT subset of CPP |
| chr7 | 99704892  | C | C | C,T  | Heterozygous CTC NOT subset of CPP |
| chr7 | 99711873  | C | C | C,G  | Heterozygous CTC NOT subset of CPP |
| chr7 | 100028187 | C | C | C,T  | Heterozygous CTC NOT subset of CPP |
| chr7 | 100028484 | T | T | C,T  | Heterozygous CTC NOT subset of CPP |
| chr7 | 100064719 | A | A | A,G  | Heterozygous CTC NOT subset of CPP |
| chr7 | 100072031 | T | T | C,T  | Heterozygous CTC NOT subset of CPP |

Grillet et al., Supplementary Table 5

|      |           |   |     |        |                                    |
|------|-----------|---|-----|--------|------------------------------------|
| chr7 | 100404997 | G | G   | A,G    | Heterozygous CTC NOT subset of CPP |
| chr7 | 100731829 | T | C   | C,T    | Heterozygous CTC NOT subset of CPP |
| chr7 | 100853882 | G | G   | A,G    | Heterozygous CTC NOT subset of CPP |
| chr7 | 103003877 | A | A,G | A,T    | Heterozygous CTC NOT subset of CPP |
| chr7 | 105739700 | C | C   | A,C    | Heterozygous CTC NOT subset of CPP |
| chr7 | 107557279 | T | T   | G,T    | Heterozygous CTC NOT subset of CPP |
| chr7 | 115897392 | G | G   | C,G    | Heterozygous CTC NOT subset of CPP |
| chr7 | 116528240 | C | C   | C,T    | Heterozygous CTC NOT subset of CPP |
| chr7 | 129762004 | G | G   | G,T    | Heterozygous CTC NOT subset of CPP |
| chr7 | 132719399 | T | T   | C,T    | Heterozygous CTC NOT subset of CPP |
| chr7 | 135322710 | G | G   | A,G    | Heterozygous CTC NOT subset of CPP |
| chr7 | 135614680 | G | G   | A,G    | Heterozygous CTC NOT subset of CPP |
| chr7 | 138263991 | A | A   | A,G    | Heterozygous CTC NOT subset of CPP |
| chr7 | 139026152 | T | T   | G,T    | Heterozygous CTC NOT subset of CPP |
| chr7 | 142962374 | G | G   | A,G    | Heterozygous CTC NOT subset of CPP |
| chr7 | 148921485 | C | C   | A,C    | Heterozygous CTC NOT subset of CPP |
| chr8 | 19192332  | G | T   | G      | Heterozygous CTC NOT subset of CPP |
| chr8 | 26510792  | T | C   | T      | Heterozygous CTC NOT subset of CPP |
| chr8 | 48711807  | C | C   | C,T    | Heterozygous CTC NOT subset of CPP |
| chr8 | 48749796  | G | G   | A,G    | Heterozygous CTC NOT subset of CPP |
| chr8 | 48872671  | C | C   | A,C    | Heterozygous CTC NOT subset of CPP |
| chr8 | 53586706  | A | G   | A,G    | Heterozygous CTC NOT subset of CPP |
| chr8 | 59511842  | G | G   | A,G    | Heterozygous CTC NOT subset of CPP |
| chr8 | 63938764  | G | G   | A,G    | Heterozygous CTC NOT subset of CPP |
| chr8 | 63951237  | C | C   | C,T    | Heterozygous CTC NOT subset of CPP |
| chr8 | 63951312  | A | A   | A,G    | Heterozygous CTC NOT subset of CPP |
| chr8 | 74888494  | C | C   | C,T    | Heterozygous CTC NOT subset of CPP |
| chr8 | 87519315  | T | T   | G,T    | Heterozygous CTC NOT subset of CPP |
| chr8 | 97245442  | G | G   | G,T    | Heterozygous CTC NOT subset of CPP |
| chr8 | 103663912 | T | G   | T      | Heterozygous CTC NOT subset of CPP |
| chr8 | 110301998 | T | T   | C,T    | Heterozygous CTC NOT subset of CPP |
| chr8 | 117864217 | A | A   | A,G    | Heterozygous CTC NOT subset of CPP |
| chr8 | 120220776 | G | -G  | -G,C,G | Heterozygous CTC NOT subset of CPP |
| chr8 | 120744293 | C | C   | C,T    | Heterozygous CTC NOT subset of CPP |
| chr8 | 125562029 | C | C   | C,T    | Heterozygous CTC NOT subset of CPP |
| chr8 | 126010805 | G | G   | C,G    | Heterozygous CTC NOT subset of CPP |
| chr8 | 144103125 | C | C   | C,T    | Heterozygous CTC NOT subset of CPP |
| chr8 | 144403449 | G | G   | A,G    | Heterozygous CTC NOT subset of CPP |
| chr8 | 144413416 | G | G   | A,G    | Heterozygous CTC NOT subset of CPP |
| chr8 | 144654693 | G | C   | C,G    | Heterozygous CTC NOT subset of CPP |
| chr8 | 144657801 | G | G   | A,G    | Heterozygous CTC NOT subset of CPP |
| chr8 | 144658711 | G | A   | A,G    | Heterozygous CTC NOT subset of CPP |
| chr8 | 144659909 | C | C   | -C,C   | Heterozygous CTC NOT subset of CPP |
| chr8 | 144660046 | G | G   | A,G    | Heterozygous CTC NOT subset of CPP |
| chr8 | 144662353 | G | A   | A,G    | Heterozygous CTC NOT subset of CPP |
| chr8 | 144808926 | C | C   | C,T    | Heterozygous CTC NOT subset of CPP |

Grillet et al., Supplementary Table 5

|      |           |   |      |        |                                    |
|------|-----------|---|------|--------|------------------------------------|
| chr8 | 144810346 | C | C    | A,C    | Heterozygous CTC NOT subset of CPP |
| chr8 | 144810584 | G | G    | A,G    | Heterozygous CTC NOT subset of CPP |
| chr8 | 144886809 | C | C    | C,T    | Heterozygous CTC NOT subset of CPP |
| chr8 | 144893084 | G | A    | A,G    | Heterozygous CTC NOT subset of CPP |
| chr8 | 144990335 | G | A    | A,G    | Heterozygous CTC NOT subset of CPP |
| chr8 | 144990528 | A | G    | A,G    | Heterozygous CTC NOT subset of CPP |
| chr8 | 144991176 | T | C    | C,T    | Heterozygous CTC NOT subset of CPP |
| chr8 | 144992103 | T | C    | C,T    | Heterozygous CTC NOT subset of CPP |
| chr8 | 144992361 | T | C    | C,T    | Heterozygous CTC NOT subset of CPP |
| chr8 | 144992862 | A | G    | A,G    | Heterozygous CTC NOT subset of CPP |
| chr8 | 144993324 | C | T    | C,T    | Heterozygous CTC NOT subset of CPP |
| chr8 | 144993377 | A | G    | A,G    | Heterozygous CTC NOT subset of CPP |
| chr8 | 144993931 | C | G    | C      | Heterozygous CTC NOT subset of CPP |
| chr8 | 145137569 | C | C    | C,G    | Heterozygous CTC NOT subset of CPP |
| chr8 | 145623963 | G | G    | A,G    | Heterozygous CTC NOT subset of CPP |
| chr8 | 145652344 | G | G    | C,G    | Heterozygous CTC NOT subset of CPP |
| chr8 | 145655860 | G | G    | A,G    | Heterozygous CTC NOT subset of CPP |
| chr8 | 145660237 | C | C    | C,T    | Heterozygous CTC NOT subset of CPP |
| chr8 | 145737705 | C | C    | C,T    | Heterozygous CTC NOT subset of CPP |
| chr8 | 145738768 | G | -G,C | -G,C,G | Heterozygous CTC NOT subset of CPP |
| chr8 | 145754187 | C | C    | C,G    | Heterozygous CTC NOT subset of CPP |
| chr8 | 146067054 | G | G    | A,G    | Heterozygous CTC NOT subset of CPP |
| chr8 | 146076708 | C | C    | C,T    | Heterozygous CTC NOT subset of CPP |
| chr8 | 146278038 | G | G    | A,G    | Heterozygous CTC NOT subset of CPP |
| chr8 | 146279480 | T | T    | G,T    | Heterozygous CTC NOT subset of CPP |
| chr9 | 5832928   | G | G    | C,G    | Heterozygous CTC NOT subset of CPP |
| chr9 | 37974743  | T | C    | C,T    | Heterozygous CTC NOT subset of CPP |
| chr9 | 88633203  | C | C    | T      | Heterozygous CTC NOT subset of CPP |
| chr9 | 95004522  | C | C    | C,G    | Heterozygous CTC NOT subset of CPP |
| chr9 | 95019011  | G | G    | A,G    | Heterozygous CTC NOT subset of CPP |
| chr9 | 96291646  | G | G    | A,G    | Heterozygous CTC NOT subset of CPP |
| chr9 | 100819192 | C | C    | C,T    | Heterozygous CTC NOT subset of CPP |
| chr9 | 108147763 | T | T    | G,T    | Heterozygous CTC NOT subset of CPP |
| chr9 | 108152199 | G | A    | A,G    | Heterozygous CTC NOT subset of CPP |
| chr9 | 113007064 | T | T    | C,G,T  | Heterozygous CTC NOT subset of CPP |
| chr9 | 123301346 | T | T    | G,T    | Heterozygous CTC NOT subset of CPP |
| chr9 | 127912119 | T | T    | C,T    | Heterozygous CTC NOT subset of CPP |
| chr9 | 130884753 | C | C    | C,T    | Heterozygous CTC NOT subset of CPP |
| chr9 | 131233701 | T | T    | C,T    | Heterozygous CTC NOT subset of CPP |
| chr9 | 131380029 | C | C    | C,T    | Heterozygous CTC NOT subset of CPP |
| chr9 | 132591727 | G | G    | A,G    | Heterozygous CTC NOT subset of CPP |
| chr9 | 132848699 | G | G    | C,G    | Heterozygous CTC NOT subset of CPP |
| chr9 | 133333936 | G | G    | G,T    | Heterozygous CTC NOT subset of CPP |
| chr9 | 133760106 | C | C    | C,T    | Heterozygous CTC NOT subset of CPP |
| chr9 | 134346315 | T | C    | C,T    | Heterozygous CTC NOT subset of CPP |
| chr9 | 136217175 | G | G    | C,G    | Heterozygous CTC NOT subset of CPP |

Grillet et al., Supplementary Table 5

|      |           |   |        |      |                                    |
|------|-----------|---|--------|------|------------------------------------|
| chr9 | 136218188 | A | A      | A,G  | Heterozygous CTC NOT subset of CPP |
| chr9 | 136916738 | G | G      | C,G  | Heterozygous CTC NOT subset of CPP |
| chr9 | 139115866 | G | G      | A,G  | Heterozygous CTC NOT subset of CPP |
| chr9 | 139118673 | T | T      | C,T  | Heterozygous CTC NOT subset of CPP |
| chr9 | 139297266 | C | C      | C,T  | Heterozygous CTC NOT subset of CPP |
| chr9 | 139368883 | A | A      | A,G  | Heterozygous CTC NOT subset of CPP |
| chr9 | 139370127 | T | T      | C,T  | Heterozygous CTC NOT subset of CPP |
| chr9 | 139371786 | A | A      | A,C  | Heterozygous CTC NOT subset of CPP |
| chr9 | 139732467 | G | G      | -G,G | Heterozygous CTC NOT subset of CPP |
| chr9 | 140166645 | C | C      | C,T  | Heterozygous CTC NOT subset of CPP |
| chr1 | 881627    | G | A,G    | G    | Heterozygous CTC subset of CPP     |
| chr1 | 891310    | T | T      | T    | Heterozygous CTC subset of CPP     |
| chr1 | 891311    | A | A      | A    | Heterozygous CTC subset of CPP     |
| chr1 | 934602    | G | G      | G    | Heterozygous CTC subset of CPP     |
| chr1 | 948921    | T | C      | C    | Heterozygous CTC subset of CPP     |
| chr1 | 949478    | G | A,G    | G    | Heterozygous CTC subset of CPP     |
| chr1 | 949608    | G | A,G    | A    | Heterozygous CTC subset of CPP     |
| chr1 | 949654    | A | G      | G    | Heterozygous CTC subset of CPP     |
| chr1 | 957812    | A | A      | A    | Heterozygous CTC subset of CPP     |
| chr1 | 980868    | G | A,G    | G    | Heterozygous CTC subset of CPP     |
| chr1 | 980902    | A | A      | A    | Heterozygous CTC subset of CPP     |
| chr1 | 981931    | A | A,G    | A,G  | Heterozygous CTC subset of CPP     |
| chr1 | 982994    | T | C,T    | C    | Heterozygous CTC subset of CPP     |
| chr1 | 984302    | T | C,T    | T    | Heterozygous CTC subset of CPP     |
| chr1 | 990280    | C | C,T    | C    | Heterozygous CTC subset of CPP     |
| chr1 | 990380    | C | C,T    | C,T  | Heterozygous CTC subset of CPP     |
| chr1 | 1158631   | A | A,G    | G    | Heterozygous CTC subset of CPP     |
| chr1 | 1168460   | T | T      | T    | Heterozygous CTC subset of CPP     |
| chr1 | 1229577   | G | G      | G    | Heterozygous CTC subset of CPP     |
| chr1 | 1235893   | A | A      | A    | Heterozygous CTC subset of CPP     |
| chr1 | 1244652   | A | A      | A    | Heterozygous CTC subset of CPP     |
| chr1 | 1334475   | G | C,G    | G    | Heterozygous CTC subset of CPP     |
| chr1 | 1431165   | C | C,T    | C    | Heterozygous CTC subset of CPP     |
| chr1 | 1459219   | C | +C,C,T | C    | Heterozygous CTC subset of CPP     |
| chr1 | 1572549   | A | A      | A    | Heterozygous CTC subset of CPP     |
| chr1 | 1572848   | T | T      | T    | Heterozygous CTC subset of CPP     |
| chr1 | 1577180   | C | C,T    | C,T  | Heterozygous CTC subset of CPP     |
| chr1 | 1597426   | A | A      | A    | Heterozygous CTC subset of CPP     |
| chr1 | 1647804   | C | C      | C    | Heterozygous CTC subset of CPP     |
| chr1 | 1647814   | T | C,T    | C,T  | Heterozygous CTC subset of CPP     |
| chr1 | 1647871   | T | C,T    | C,T  | Heterozygous CTC subset of CPP     |
| chr1 | 1650807   | T | C,T    | C,T  | Heterozygous CTC subset of CPP     |
| chr1 | 1650832   | A | A,G    | A,G  | Heterozygous CTC subset of CPP     |
| chr1 | 1650845   | G | A,G    | A,G  | Heterozygous CTC subset of CPP     |
| chr1 | 1653046   | T | A,T    | A,T  | Heterozygous CTC subset of CPP     |
| chr1 | 1684472   | C | C,T    | C    | Heterozygous CTC subset of CPP     |



Grillet et al., Supplementary Table 5

|      |          |   |      |      |                                |
|------|----------|---|------|------|--------------------------------|
| chr1 | 1686040  | G | G,T  | T    | Heterozygous CTC subset of CPP |
| chr1 | 1735855  | T | +A,T | +A,T | Heterozygous CTC subset of CPP |
| chr1 | 2105353  | T | T    | T    | Heterozygous CTC subset of CPP |
| chr1 | 2160704  | C | C    | C    | Heterozygous CTC subset of CPP |
| chr1 | 2238122  | T | T    | T    | Heterozygous CTC subset of CPP |
| chr1 | 2238237  | A | A,T  | A    | Heterozygous CTC subset of CPP |
| chr1 | 2238244  | T | T    | T    | Heterozygous CTC subset of CPP |
| chr1 | 2328658  | A | A    | A    | Heterozygous CTC subset of CPP |
| chr1 | 2444478  | C | -C,C | C    | Heterozygous CTC subset of CPP |
| chr1 | 2520479  | G | G    | G    | Heterozygous CTC subset of CPP |
| chr1 | 2522392  | G | A,G  | G    | Heterozygous CTC subset of CPP |
| chr1 | 3379954  | A | A    | A    | Heterozygous CTC subset of CPP |
| chr1 | 3548136  | T | C,T  | C,T  | Heterozygous CTC subset of CPP |
| chr1 | 3553661  | T | T    | T    | Heterozygous CTC subset of CPP |
| chr1 | 3703611  | A | A    | A    | Heterozygous CTC subset of CPP |
| chr1 | 3703710  | G | A,G  | G    | Heterozygous CTC subset of CPP |
| chr1 | 3753136  | A | A,T  | A,T  | Heterozygous CTC subset of CPP |
| chr1 | 3764133  | C | C    | C    | Heterozygous CTC subset of CPP |
| chr1 | 6257784  | C | +T,C | +T,C | Heterozygous CTC subset of CPP |
| chr1 | 6324747  | G | A,G  | G    | Heterozygous CTC subset of CPP |
| chr1 | 6614535  | G | A,G  | A,G  | Heterozygous CTC subset of CPP |
| chr1 | 6659505  | G | A,G  | G    | Heterozygous CTC subset of CPP |
| chr1 | 6697285  | C | C,T  | C    | Heterozygous CTC subset of CPP |
| chr1 | 6705874  | G | C,G  | C,G  | Heterozygous CTC subset of CPP |
| chr1 | 6705944  | C | C    | C    | Heterozygous CTC subset of CPP |
| chr1 | 8418644  | C | A,C  | A    | Heterozygous CTC subset of CPP |
| chr1 | 8418650  | T | C,T  | C    | Heterozygous CTC subset of CPP |
| chr1 | 8421092  | C | C,T  | C,T  | Heterozygous CTC subset of CPP |
| chr1 | 8421203  | T | C,T  | C    | Heterozygous CTC subset of CPP |
| chr1 | 8425900  | T | C,T  | C,T  | Heterozygous CTC subset of CPP |
| chr1 | 8930572  | G | G,T  | G,T  | Heterozygous CTC subset of CPP |
| chr1 | 9811541  | A | A,G  | A    | Heterozygous CTC subset of CPP |
| chr1 | 10221256 | T | T    | T    | Heterozygous CTC subset of CPP |
| chr1 | 10460485 | T | C,T  | C,T  | Heterozygous CTC subset of CPP |
| chr1 | 10473196 | C | C,T  | C,T  | Heterozygous CTC subset of CPP |
| chr1 | 10502454 | G | A,G  | G    | Heterozygous CTC subset of CPP |
| chr1 | 10596341 | C | C,T  | C,T  | Heterozygous CTC subset of CPP |
| chr1 | 10684433 | A | A    | A    | Heterozygous CTC subset of CPP |
| chr1 | 10689924 | C | C    | C    | Heterozygous CTC subset of CPP |
| chr1 | 10689942 | G | G,T  | G,T  | Heterozygous CTC subset of CPP |
| chr1 | 11083248 | A | A    | A    | Heterozygous CTC subset of CPP |
| chr1 | 11115982 | G | +C,G | G    | Heterozygous CTC subset of CPP |
| chr1 | 11128107 | A | A    | A    | Heterozygous CTC subset of CPP |
| chr1 | 11128119 | A | A    | A    | Heterozygous CTC subset of CPP |
| chr1 | 11132217 | G | A,G  | A    | Heterozygous CTC subset of CPP |
| chr1 | 11141187 | C | C,G  | G    | Heterozygous CTC subset of CPP |

Grillet et al., Supplementary Table 5

|      |          |   |         |       |                                |
|------|----------|---|---------|-------|--------------------------------|
| chr1 | 11169397 | A | A       | A     | Heterozygous CTC subset of CPP |
| chr1 | 11169736 | T | T       | T     | Heterozygous CTC subset of CPP |
| chr1 | 11187775 | T | T       | T     | Heterozygous CTC subset of CPP |
| chr1 | 11983206 | A | A,G     | A     | Heterozygous CTC subset of CPP |
| chr1 | 12009939 | A | A       | A     | Heterozygous CTC subset of CPP |
| chr1 | 12009955 | C | C,T     | C     | Heterozygous CTC subset of CPP |
| chr1 | 12012724 | T | T       | T     | Heterozygous CTC subset of CPP |
| chr1 | 12082209 | T | T       | T     | Heterozygous CTC subset of CPP |
| chr1 | 12090174 | T | T       | T     | Heterozygous CTC subset of CPP |
| chr1 | 16051833 | T | T       | T     | Heterozygous CTC subset of CPP |
| chr1 | 16052039 | A | A       | A     | Heterozygous CTC subset of CPP |
| chr1 | 16056364 | G | A,G     | A,G   | Heterozygous CTC subset of CPP |
| chr1 | 16133996 | A | A       | A     | Heterozygous CTC subset of CPP |
| chr1 | 16258736 | A | A       | A     | Heterozygous CTC subset of CPP |
| chr1 | 16259813 | A | A,G     | A,G   | Heterozygous CTC subset of CPP |
| chr1 | 16265904 | T | A,T     | T     | Heterozygous CTC subset of CPP |
| chr1 | 16451767 | G | A,G     | A,G   | Heterozygous CTC subset of CPP |
| chr1 | 16456053 | A | A       | A     | Heterozygous CTC subset of CPP |
| chr1 | 16464673 | G | A,G     | A     | Heterozygous CTC subset of CPP |
| chr1 | 16464925 | G | G       | G     | Heterozygous CTC subset of CPP |
| chr1 | 16474890 | A | A       | A     | Heterozygous CTC subset of CPP |
| chr1 | 16475126 | C | C,T     | T     | Heterozygous CTC subset of CPP |
| chr1 | 16719724 | A | A       | A     | Heterozygous CTC subset of CPP |
| chr1 | 16770200 | T | T       | T     | Heterozygous CTC subset of CPP |
| chr1 | 16782363 | T | T       | T     | Heterozygous CTC subset of CPP |
| chr1 | 17313302 | T | T       | T     | Heterozygous CTC subset of CPP |
| chr1 | 17313654 | C | C,T     | T     | Heterozygous CTC subset of CPP |
| chr1 | 17314942 | G | A,G     | A     | Heterozygous CTC subset of CPP |
| chr1 | 17739586 | G | A,G     | G     | Heterozygous CTC subset of CPP |
| chr1 | 19411129 | A | A,G     | G     | Heterozygous CTC subset of CPP |
| chr1 | 19413261 | T | A,T     | A     | Heterozygous CTC subset of CPP |
| chr1 | 19415304 | C | C,T     | T     | Heterozygous CTC subset of CPP |
| chr1 | 19553832 | A | A       | A     | Heterozygous CTC subset of CPP |
| chr1 | 19559614 | A | A       | A     | Heterozygous CTC subset of CPP |
| chr1 | 19565756 | A | A       | A     | Heterozygous CTC subset of CPP |
| chr1 | 19566374 | T | T       | T     | Heterozygous CTC subset of CPP |
| chr1 | 19567523 | T | T       | T     | Heterozygous CTC subset of CPP |
| chr1 | 19584336 | G | A,G     | G     | Heterozygous CTC subset of CPP |
| chr1 | 19934963 | T | A,C,G,T | C,G,T | Heterozygous CTC subset of CPP |
| chr1 | 19935029 | T | G       | G     | Heterozygous CTC subset of CPP |
| chr1 | 20982631 | G | A,G     | A,G   | Heterozygous CTC subset of CPP |
| chr1 | 21220091 | A | A       | A     | Heterozygous CTC subset of CPP |
| chr1 | 21226376 | T | T       | T     | Heterozygous CTC subset of CPP |
| chr1 | 21502763 | T | C,T     | T     | Heterozygous CTC subset of CPP |
| chr1 | 21548274 | G | A,G     | G     | Heterozygous CTC subset of CPP |
| chr1 | 22041926 | T | T       | T     | Heterozygous CTC subset of CPP |

Grillet et al., Supplementary Table 5

|      |          |   |      |      |                                |
|------|----------|---|------|------|--------------------------------|
| chr1 | 22047658 | T | T    | T    | Heterozygous CTC subset of CPP |
| chr1 | 22074690 | A | A    | A    | Heterozygous CTC subset of CPP |
| chr1 | 22109370 | G | A,G  | G    | Heterozygous CTC subset of CPP |
| chr1 | 23383975 | A | +G,A | +G,A | Heterozygous CTC subset of CPP |
| chr1 | 24022398 | G | G    | G    | Heterozygous CTC subset of CPP |
| chr1 | 24022906 | A | A    | A    | Heterozygous CTC subset of CPP |
| chr1 | 24077635 | T | T    | T    | Heterozygous CTC subset of CPP |
| chr1 | 24078504 | T | C,T  | T    | Heterozygous CTC subset of CPP |
| chr1 | 24080934 | T | T    | T    | Heterozygous CTC subset of CPP |
| chr1 | 24083494 | C | C,T  | C,T  | Heterozygous CTC subset of CPP |
| chr1 | 24119698 | T | T    | T    | Heterozygous CTC subset of CPP |
| chr1 | 24840873 | A | A    | A    | Heterozygous CTC subset of CPP |
| chr1 | 24969823 | C | C,T  | C    | Heterozygous CTC subset of CPP |
| chr1 | 24993333 | A | A    | A    | Heterozygous CTC subset of CPP |
| chr1 | 24998758 | A | A    | A    | Heterozygous CTC subset of CPP |
| chr1 | 25785018 | C | C    | C    | Heterozygous CTC subset of CPP |
| chr1 | 25824924 | C | C    | C    | Heterozygous CTC subset of CPP |
| chr1 | 26496651 | T | C,T  | C,T  | Heterozygous CTC subset of CPP |
| chr1 | 26582091 | G | A,G  | G    | Heterozygous CTC subset of CPP |
| chr1 | 26883181 | A | A    | A    | Heterozygous CTC subset of CPP |
| chr1 | 26883511 | A | A,C  | A,C  | Heterozygous CTC subset of CPP |
| chr1 | 26887552 | A | A    | A    | Heterozygous CTC subset of CPP |
| chr1 | 26887592 | T | C,T  | T    | Heterozygous CTC subset of CPP |
| chr1 | 26887605 | A | A    | A    | Heterozygous CTC subset of CPP |
| chr1 | 26900920 | A | A,T  | A    | Heterozygous CTC subset of CPP |
| chr1 | 26900923 | T | T    | T    | Heterozygous CTC subset of CPP |
| chr1 | 27059214 | A | A    | A    | Heterozygous CTC subset of CPP |
| chr1 | 27101234 | T | T    | T    | Heterozygous CTC subset of CPP |
| chr1 | 27102135 | A | A    | A    | Heterozygous CTC subset of CPP |
| chr1 | 27206159 | A | A    | A    | Heterozygous CTC subset of CPP |
| chr1 | 27216517 | G | G    | G    | Heterozygous CTC subset of CPP |
| chr1 | 27220782 | A | A    | A    | Heterozygous CTC subset of CPP |
| chr1 | 27272167 | A | A    | A    | Heterozygous CTC subset of CPP |
| chr1 | 27272721 | A | A    | A    | Heterozygous CTC subset of CPP |
| chr1 | 28173578 | T | T    | T    | Heterozygous CTC subset of CPP |
| chr1 | 28240680 | C | C    | C    | Heterozygous CTC subset of CPP |
| chr1 | 28562781 | G | G    | G    | Heterozygous CTC subset of CPP |
| chr1 | 28785729 | G | G    | G    | Heterozygous CTC subset of CPP |
| chr1 | 28800380 | C | A,C  | C    | Heterozygous CTC subset of CPP |
| chr1 | 28861636 | G | A,G  | G    | Heterozygous CTC subset of CPP |
| chr1 | 29064844 | A | A    | A    | Heterozygous CTC subset of CPP |
| chr1 | 29070261 | T | T    | T    | Heterozygous CTC subset of CPP |
| chr1 | 29319858 | T | T    | T    | Heterozygous CTC subset of CPP |
| chr1 | 29475341 | C | C,T  | C,T  | Heterozygous CTC subset of CPP |
| chr1 | 29475394 | C | C,G  | C,G  | Heterozygous CTC subset of CPP |
| chr1 | 29520544 | A | A    | A    | Heterozygous CTC subset of CPP |

Grillet et al., Supplementary Table 5

|      |          |   |          |      |                                |
|------|----------|---|----------|------|--------------------------------|
| chr1 | 29542544 | A | A        | A    | Heterozygous CTC subset of CPP |
| chr1 | 31425100 | A | A        | A    | Heterozygous CTC subset of CPP |
| chr1 | 31426815 | A | A,G      | A,G  | Heterozygous CTC subset of CPP |
| chr1 | 31447516 | A | A        | A    | Heterozygous CTC subset of CPP |
| chr1 | 31478835 | A | A        | A    | Heterozygous CTC subset of CPP |
| chr1 | 31732602 | C | C        | C    | Heterozygous CTC subset of CPP |
| chr1 | 31732603 | A | -A,-AA,A | -A,A | Heterozygous CTC subset of CPP |
| chr1 | 31732618 | A | A        | A    | Heterozygous CTC subset of CPP |
| chr1 | 31732677 | G | +A,G     | G    | Heterozygous CTC subset of CPP |
| chr1 | 31732678 | A | A        | A    | Heterozygous CTC subset of CPP |
| chr1 | 31886101 | G | C,G      | G    | Heterozygous CTC subset of CPP |
| chr1 | 31897643 | G | A,G      | G    | Heterozygous CTC subset of CPP |
| chr1 | 31898234 | T | C,T      | C,T  | Heterozygous CTC subset of CPP |
| chr1 | 31898687 | C | C        | C    | Heterozygous CTC subset of CPP |
| chr1 | 31905889 | A | A        | A    | Heterozygous CTC subset of CPP |
| chr1 | 31905905 | G | C,G      | G    | Heterozygous CTC subset of CPP |
| chr1 | 31905906 | T | T        | T    | Heterozygous CTC subset of CPP |
| chr1 | 32098914 | A | A        | A    | Heterozygous CTC subset of CPP |
| chr1 | 32667700 | G | G        | G    | Heterozygous CTC subset of CPP |
| chr1 | 32790153 | G | G        | G    | Heterozygous CTC subset of CPP |
| chr1 | 33117641 | A | A        | A    | Heterozygous CTC subset of CPP |
| chr1 | 33145340 | C | C        | C    | Heterozygous CTC subset of CPP |
| chr1 | 33146113 | C | +T,C     | C    | Heterozygous CTC subset of CPP |
| chr1 | 33146114 | T | T        | T    | Heterozygous CTC subset of CPP |
| chr1 | 33146157 | A | A        | A    | Heterozygous CTC subset of CPP |
| chr1 | 33235276 | T | T        | T    | Heterozygous CTC subset of CPP |
| chr1 | 33235626 | G | A,G      | A,G  | Heterozygous CTC subset of CPP |
| chr1 | 33235789 | C | C,T      | C    | Heterozygous CTC subset of CPP |
| chr1 | 33237964 | A | A        | A    | Heterozygous CTC subset of CPP |
| chr1 | 33245802 | C | C,G      | C,G  | Heterozygous CTC subset of CPP |
| chr1 | 33248142 | T | -T,T     | -T,T | Heterozygous CTC subset of CPP |
| chr1 | 33474565 | T | T        | T    | Heterozygous CTC subset of CPP |
| chr1 | 33474582 | A | A        | A    | Heterozygous CTC subset of CPP |
| chr1 | 33474681 | A | A        | A    | Heterozygous CTC subset of CPP |
| chr1 | 33475689 | T | T        | T    | Heterozygous CTC subset of CPP |
| chr1 | 33476335 | A | A        | A    | Heterozygous CTC subset of CPP |
| chr1 | 33476344 | A | A        | A    | Heterozygous CTC subset of CPP |
| chr1 | 33478695 | A | A        | A    | Heterozygous CTC subset of CPP |
| chr1 | 33490119 | T | T        | T    | Heterozygous CTC subset of CPP |
| chr1 | 33790496 | G | A,G      | A    | Heterozygous CTC subset of CPP |
| chr1 | 35652601 | C | +G,C     | +G,C | Heterozygous CTC subset of CPP |
| chr1 | 35836225 | C | C        | C    | Heterozygous CTC subset of CPP |
| chr1 | 35847279 | T | T        | T    | Heterozygous CTC subset of CPP |
| chr1 | 35855581 | T | T        | T    | Heterozygous CTC subset of CPP |
| chr1 | 36023484 | G | G        | G    | Heterozygous CTC subset of CPP |
| chr1 | 36026008 | A | A        | A    | Heterozygous CTC subset of CPP |

Grillet et al., Supplementary Table 5

|      |          |   |     |     |                                |
|------|----------|---|-----|-----|--------------------------------|
| chr1 | 36643620 | G | A,G | G   | Heterozygous CTC subset of CPP |
| chr1 | 36645668 | G | G   | G   | Heterozygous CTC subset of CPP |
| chr1 | 36752152 | C | C,T | T   | Heterozygous CTC subset of CPP |
| chr1 | 36752433 | C | C,T | T   | Heterozygous CTC subset of CPP |
| chr1 | 36927733 | G | A,G | A   | Heterozygous CTC subset of CPP |
| chr1 | 38006292 | T | T   | T   | Heterozygous CTC subset of CPP |
| chr1 | 38166144 | A | A   | A   | Heterozygous CTC subset of CPP |
| chr1 | 38449908 | T | T   | T   | Heterozygous CTC subset of CPP |
| chr1 | 39457006 | C | C,T | C,T | Heterozygous CTC subset of CPP |
| chr1 | 39457016 | C | C,T | C   | Heterozygous CTC subset of CPP |
| chr1 | 39500186 | G | A,G | G   | Heterozygous CTC subset of CPP |
| chr1 | 39914363 | G | C,G | G   | Heterozygous CTC subset of CPP |
| chr1 | 39916778 | G | G   | G   | Heterozygous CTC subset of CPP |
| chr1 | 39951387 | T | T   | T   | Heterozygous CTC subset of CPP |
| chr1 | 40027750 | A | A   | A   | Heterozygous CTC subset of CPP |
| chr1 | 40030823 | C | C,T | C   | Heterozygous CTC subset of CPP |
| chr1 | 40035320 | T | C,T | T   | Heterozygous CTC subset of CPP |
| chr1 | 40204590 | C | C,T | C   | Heterozygous CTC subset of CPP |
| chr1 | 40209596 | G | G   | G   | Heterozygous CTC subset of CPP |
| chr1 | 40310290 | A | A   | A   | Heterozygous CTC subset of CPP |
| chr1 | 40527482 | G | G   | G   | Heterozygous CTC subset of CPP |
| chr1 | 40558170 | C | C,T | C   | Heterozygous CTC subset of CPP |
| chr1 | 40737589 | T | C,T | T   | Heterozygous CTC subset of CPP |
| chr1 | 40756542 | G | G   | G   | Heterozygous CTC subset of CPP |
| chr1 | 40881883 | C | C   | C   | Heterozygous CTC subset of CPP |
| chr1 | 41204569 | C | C,T | T   | Heterozygous CTC subset of CPP |
| chr1 | 42922653 | G | G   | G   | Heterozygous CTC subset of CPP |
| chr1 | 43131653 | G | A,G | A   | Heterozygous CTC subset of CPP |
| chr1 | 43148388 | A | A   | A   | Heterozygous CTC subset of CPP |
| chr1 | 43148397 | T | T   | T   | Heterozygous CTC subset of CPP |
| chr1 | 43161925 | A | A   | A   | Heterozygous CTC subset of CPP |
| chr1 | 43232523 | G | G   | G   | Heterozygous CTC subset of CPP |
| chr1 | 43632536 | C | C,T | C   | Heterozygous CTC subset of CPP |
| chr1 | 43636484 | C | C,G | C   | Heterozygous CTC subset of CPP |
| chr1 | 43851797 | G | G   | G   | Heterozygous CTC subset of CPP |
| chr1 | 44035352 | C | C,T | C,T | Heterozygous CTC subset of CPP |
| chr1 | 44058265 | C | A,C | A,C | Heterozygous CTC subset of CPP |
| chr1 | 44064551 | C | C   | C   | Heterozygous CTC subset of CPP |
| chr1 | 44071221 | G | A,G | A,G | Heterozygous CTC subset of CPP |
| chr1 | 44071937 | A | A   | A   | Heterozygous CTC subset of CPP |
| chr1 | 44072018 | C | C,T | C,T | Heterozygous CTC subset of CPP |
| chr1 | 44072066 | C | C,T | C,T | Heterozygous CTC subset of CPP |
| chr1 | 44083519 | G | A,G | A,G | Heterozygous CTC subset of CPP |
| chr1 | 44084739 | C | C,T | C,T | Heterozygous CTC subset of CPP |
| chr1 | 44086831 | C | C,T | C,T | Heterozygous CTC subset of CPP |
| chr1 | 44133657 | T | T   | T   | Heterozygous CTC subset of CPP |

Grillet et al., Supplementary Table 5

|      |          |   |      |      |                                |
|------|----------|---|------|------|--------------------------------|
| chr1 | 44134944 | A | A    | A    | Heterozygous CTC subset of CPP |
| chr1 | 44137212 | T | T    | T    | Heterozygous CTC subset of CPP |
| chr1 | 44137257 | C | A,C  | A,C  | Heterozygous CTC subset of CPP |
| chr1 | 44440769 | G | C,G  | C,G  | Heterozygous CTC subset of CPP |
| chr1 | 44447413 | G | C,G  | C,G  | Heterozygous CTC subset of CPP |
| chr1 | 44450675 | T | T    | T    | Heterozygous CTC subset of CPP |
| chr1 | 44451234 | C | C,T  | C,T  | Heterozygous CTC subset of CPP |
| chr1 | 45110742 | C | C,T  | C    | Heterozygous CTC subset of CPP |
| chr1 | 45115374 | A | A,T  | A    | Heterozygous CTC subset of CPP |
| chr1 | 45243792 | A | A    | A    | Heterozygous CTC subset of CPP |
| chr1 | 45407225 | T | T    | T    | Heterozygous CTC subset of CPP |
| chr1 | 45479661 | T | T    | T    | Heterozygous CTC subset of CPP |
| chr1 | 45480425 | T | T    | T    | Heterozygous CTC subset of CPP |
| chr1 | 45793854 | G | G    | G    | Heterozygous CTC subset of CPP |
| chr1 | 45808870 | A | A    | A    | Heterozygous CTC subset of CPP |
| chr1 | 45809185 | T | T    | T    | Heterozygous CTC subset of CPP |
| chr1 | 45981324 | A | +C,A | +C,A | Heterozygous CTC subset of CPP |
| chr1 | 46032311 | A | A,G  | A    | Heterozygous CTC subset of CPP |
| chr1 | 46070688 | G | -G,G | -G,G | Heterozygous CTC subset of CPP |
| chr1 | 46095272 | T | C,T  | C,T  | Heterozygous CTC subset of CPP |
| chr1 | 46491482 | T | T    | T    | Heterozygous CTC subset of CPP |
| chr1 | 46495859 | T | T    | T    | Heterozygous CTC subset of CPP |
| chr1 | 46500501 | A | A    | A    | Heterozygous CTC subset of CPP |
| chr1 | 46660295 | T | C,T  | C,T  | Heterozygous CTC subset of CPP |
| chr1 | 46744421 | G | G    | G    | Heterozygous CTC subset of CPP |
| chr1 | 46752128 | G | G    | G    | Heterozygous CTC subset of CPP |
| chr1 | 46768864 | G | C,G  | G    | Heterozygous CTC subset of CPP |
| chr1 | 47108904 | T | T    | T    | Heterozygous CTC subset of CPP |
| chr1 | 47133811 | T | C,T  | C,T  | Heterozygous CTC subset of CPP |
| chr1 | 47152480 | A | A    | A    | Heterozygous CTC subset of CPP |
| chr1 | 47799639 | G | C,G  | G    | Heterozygous CTC subset of CPP |
| chr1 | 51061810 | G | G    | G    | Heterozygous CTC subset of CPP |
| chr1 | 51121198 | T | C,T  | C,T  | Heterozygous CTC subset of CPP |
| chr1 | 51826921 | T | C,T  | C,T  | Heterozygous CTC subset of CPP |
| chr1 | 52215864 | C | C    | C    | Heterozygous CTC subset of CPP |
| chr1 | 52252200 | A | A    | A    | Heterozygous CTC subset of CPP |
| chr1 | 52254956 | A | A    | A    | Heterozygous CTC subset of CPP |
| chr1 | 52266242 | G | A,G  | A,G  | Heterozygous CTC subset of CPP |
| chr1 | 52290984 | T | G,T  | G,T  | Heterozygous CTC subset of CPP |
| chr1 | 52306075 | T | C,T  | C,T  | Heterozygous CTC subset of CPP |
| chr1 | 52306079 | T | T    | T    | Heterozygous CTC subset of CPP |
| chr1 | 52874358 | T | T    | T    | Heterozygous CTC subset of CPP |
| chr1 | 52874362 | G | G    | G    | Heterozygous CTC subset of CPP |
| chr1 | 53153432 | T | C,T  | T    | Heterozygous CTC subset of CPP |
| chr1 | 53681699 | T | G,T  | T    | Heterozygous CTC subset of CPP |
| chr1 | 53684587 | A | A    | A    | Heterozygous CTC subset of CPP |

Grillet et al., Supplementary Table 5

|      |          |   |      |     |                                |
|------|----------|---|------|-----|--------------------------------|
| chr1 | 53692760 | A | A    | A   | Heterozygous CTC subset of CPP |
| chr1 | 53712727 | C | C,T  | C   | Heterozygous CTC subset of CPP |
| chr1 | 53716416 | G | A,G  | A,G | Heterozygous CTC subset of CPP |
| chr1 | 54291558 | G | G    | G   | Heterozygous CTC subset of CPP |
| chr1 | 54298204 | A | A    | A   | Heterozygous CTC subset of CPP |
| chr1 | 54387428 | A | A    | A   | Heterozygous CTC subset of CPP |
| chr1 | 54432019 | G | A,G  | A,G | Heterozygous CTC subset of CPP |
| chr1 | 54433593 | A | A    | A   | Heterozygous CTC subset of CPP |
| chr1 | 54678329 | G | G    | G   | Heterozygous CTC subset of CPP |
| chr1 | 54681920 | G | C,G  | C   | Heterozygous CTC subset of CPP |
| chr1 | 54683856 | C | C,G  | C   | Heterozygous CTC subset of CPP |
| chr1 | 54683925 | G | A,G  | G   | Heterozygous CTC subset of CPP |
| chr1 | 55182300 | T | A,T  | A   | Heterozygous CTC subset of CPP |
| chr1 | 55505503 | T | T    | T   | Heterozygous CTC subset of CPP |
| chr1 | 55505526 | T | T    | T   | Heterozygous CTC subset of CPP |
| chr1 | 55518443 | A | A    | A   | Heterozygous CTC subset of CPP |
| chr1 | 55524197 | A | G    | G   | Heterozygous CTC subset of CPP |
| chr1 | 55548964 | G | G    | G   | Heterozygous CTC subset of CPP |
| chr1 | 60280750 | T | -T   | -T  | Heterozygous CTC subset of CPP |
| chr1 | 60312773 | T | T    | T   | Heterozygous CTC subset of CPP |
| chr1 | 60325999 | A | +G,A | A   | Heterozygous CTC subset of CPP |
| chr1 | 62175017 | T | T    | T   | Heterozygous CTC subset of CPP |
| chr1 | 62916290 | A | A,G  | A   | Heterozygous CTC subset of CPP |
| chr1 | 63988800 | G | G    | G   | Heterozygous CTC subset of CPP |
| chr1 | 65303659 | C | C,T  | C,T | Heterozygous CTC subset of CPP |
| chr1 | 65303784 | T | T    | T   | Heterozygous CTC subset of CPP |
| chr1 | 65307021 | A | A    | A   | Heterozygous CTC subset of CPP |
| chr1 | 65310489 | T | C,T  | C,T | Heterozygous CTC subset of CPP |
| chr1 | 65311262 | G | A,G  | G   | Heterozygous CTC subset of CPP |
| chr1 | 65312380 | G | G    | G   | Heterozygous CTC subset of CPP |
| chr1 | 65335062 | A | A,G  | A,G | Heterozygous CTC subset of CPP |
| chr1 | 65335095 | T | C,T  | T   | Heterozygous CTC subset of CPP |
| chr1 | 70740423 | T | T    | T   | Heterozygous CTC subset of CPP |
| chr1 | 70820008 | C | C,T  | C   | Heterozygous CTC subset of CPP |
| chr1 | 71538191 | A | A,G  | A   | Heterozygous CTC subset of CPP |
| chr1 | 75172001 | T | A,T  | A,T | Heterozygous CTC subset of CPP |
| chr1 | 75190452 | C | C,T  | C,T | Heterozygous CTC subset of CPP |
| chr1 | 76190439 | T | C,T  | T   | Heterozygous CTC subset of CPP |
| chr1 | 76199277 | A | A,C  | A   | Heterozygous CTC subset of CPP |
| chr1 | 76227022 | A | A,G  | A   | Heterozygous CTC subset of CPP |
| chr1 | 77595018 | A | A    | A   | Heterozygous CTC subset of CPP |
| chr1 | 78187810 | C | C    | C   | Heterozygous CTC subset of CPP |
| chr1 | 78194014 | T | T    | T   | Heterozygous CTC subset of CPP |
| chr1 | 78196334 | T | T    | T   | Heterozygous CTC subset of CPP |
| chr1 | 78196394 | G | G    | G   | Heterozygous CTC subset of CPP |
| chr1 | 78201745 | G | G,T  | G,T | Heterozygous CTC subset of CPP |

Grillet et al., Supplementary Table 5

|      |           |   |     |     |                                |
|------|-----------|---|-----|-----|--------------------------------|
| chr1 | 84944989  | A | A,G | G   | Heterozygous CTC subset of CPP |
| chr1 | 85733374  | C | C,T | C,T | Heterozygous CTC subset of CPP |
| chr1 | 85816134  | T | C,T | T   | Heterozygous CTC subset of CPP |
| chr1 | 87549954  | T | T   | T   | Heterozygous CTC subset of CPP |
| chr1 | 87569184  | A | A   | A   | Heterozygous CTC subset of CPP |
| chr1 | 87570248  | A | A   | A   | Heterozygous CTC subset of CPP |
| chr1 | 89206820  | T | T   | T   | Heterozygous CTC subset of CPP |
| chr1 | 89225976  | T | C,T | C,T | Heterozygous CTC subset of CPP |
| chr1 | 89237422  | T | T   | T   | Heterozygous CTC subset of CPP |
| chr1 | 89250470  | A | A   | A   | Heterozygous CTC subset of CPP |
| chr1 | 89273215  | T | T   | T   | Heterozygous CTC subset of CPP |
| chr1 | 89273443  | G | G   | G   | Heterozygous CTC subset of CPP |
| chr1 | 89325889  | T | T   | T   | Heterozygous CTC subset of CPP |
| chr1 | 89325895  | A | A   | A   | Heterozygous CTC subset of CPP |
| chr1 | 89408762  | T | T   | T   | Heterozygous CTC subset of CPP |
| chr1 | 89448733  | G | T   | T   | Heterozygous CTC subset of CPP |
| chr1 | 89448817  | T | A,T | A,T | Heterozygous CTC subset of CPP |
| chr1 | 90470769  | A | A   | A   | Heterozygous CTC subset of CPP |
| chr1 | 90486412  | T | G,T | T   | Heterozygous CTC subset of CPP |
| chr1 | 90487903  | A | A   | A   | Heterozygous CTC subset of CPP |
| chr1 | 90493026  | G | A,G | G   | Heterozygous CTC subset of CPP |
| chr1 | 91382409  | A | A   | A   | Heterozygous CTC subset of CPP |
| chr1 | 91447891  | T | T   | T   | Heterozygous CTC subset of CPP |
| chr1 | 93299102  | A | A   | A   | Heterozygous CTC subset of CPP |
| chr1 | 93301946  | A | A   | A   | Heterozygous CTC subset of CPP |
| chr1 | 93307327  | A | A   | A   | Heterozygous CTC subset of CPP |
| chr1 | 93576123  | T | T   | T   | Heterozygous CTC subset of CPP |
| chr1 | 93581119  | T | T   | T   | Heterozygous CTC subset of CPP |
| chr1 | 93581170  | T | T   | T   | Heterozygous CTC subset of CPP |
| chr1 | 93620393  | G | A,G | A,G | Heterozygous CTC subset of CPP |
| chr1 | 94337789  | C | C   | C   | Heterozygous CTC subset of CPP |
| chr1 | 94341267  | A | A,G | A   | Heterozygous CTC subset of CPP |
| chr1 | 94342564  | C | A,C | C   | Heterozygous CTC subset of CPP |
| chr1 | 94343023  | A | A,G | A   | Heterozygous CTC subset of CPP |
| chr1 | 94343233  | T | C,T | C,T | Heterozygous CTC subset of CPP |
| chr1 | 94344716  | C | C,T | C   | Heterozygous CTC subset of CPP |
| chr1 | 94884143  | G | G   | G   | Heterozygous CTC subset of CPP |
| chr1 | 94930345  | G | A,G | G   | Heterozygous CTC subset of CPP |
| chr1 | 94946041  | T | T   | T   | Heterozygous CTC subset of CPP |
| chr1 | 94953290  | T | T   | T   | Heterozygous CTC subset of CPP |
| chr1 | 94964579  | A | A   | A   | Heterozygous CTC subset of CPP |
| chr1 | 100378027 | C | C   | C   | Heterozygous CTC subset of CPP |
| chr1 | 100459139 | T | T   | T   | Heterozygous CTC subset of CPP |
| chr1 | 100515521 | G | G   | G   | Heterozygous CTC subset of CPP |
| chr1 | 100527395 | T | T   | T   | Heterozygous CTC subset of CPP |
| chr1 | 100533604 | G | G   | G   | Heterozygous CTC subset of CPP |



Grillet et al., Supplementary Table 5

|      |           |   |        |        |                                |
|------|-----------|---|--------|--------|--------------------------------|
| chr1 | 107599918 | C | C      | C      | Heterozygous CTC subset of CPP |
| chr1 | 107600531 | T | T      | T      | Heterozygous CTC subset of CPP |
| chr1 | 107600532 | C | C      | C      | Heterozygous CTC subset of CPP |
| chr1 | 109235244 | A | A      | A      | Heterozygous CTC subset of CPP |
| chr1 | 109242267 | G | G      | G      | Heterozygous CTC subset of CPP |
| chr1 | 109289353 | C | C,G    | G      | Heterozygous CTC subset of CPP |
| chr1 | 109294880 | G | +G,A,G | +G,A,G | Heterozygous CTC subset of CPP |
| chr1 | 109338861 | G | C,G    | C,G    | Heterozygous CTC subset of CPP |
| chr1 | 109607304 | T | T      | T      | Heterozygous CTC subset of CPP |
| chr1 | 109643056 | T | T      | T      | Heterozygous CTC subset of CPP |
| chr1 | 110168845 | C | C      | C      | Heterozygous CTC subset of CPP |
| chr1 | 110173775 | G | G,T    | G      | Heterozygous CTC subset of CPP |
| chr1 | 111660873 | A | A      | A      | Heterozygous CTC subset of CPP |
| chr1 | 111674061 | G | G      | G      | Heterozygous CTC subset of CPP |
| chr1 | 111703879 | A | A      | A      | Heterozygous CTC subset of CPP |
| chr1 | 111991845 | C | A,C    | C      | Heterozygous CTC subset of CPP |
| chr1 | 111992095 | C | C,T    | C      | Heterozygous CTC subset of CPP |
| chr1 | 112308461 | T | T      | T      | Heterozygous CTC subset of CPP |
| chr1 | 113237386 | T | T      | T      | Heterozygous CTC subset of CPP |
| chr1 | 113456546 | A | A,T    | A,T    | Heterozygous CTC subset of CPP |
| chr1 | 115268863 | T | T      | T      | Heterozygous CTC subset of CPP |
| chr1 | 115318974 | T | T      | T      | Heterozygous CTC subset of CPP |
| chr1 | 116206423 | G | A,G    | G      | Heterozygous CTC subset of CPP |
| chr1 | 116916056 | C | C,T    | C      | Heterozygous CTC subset of CPP |
| chr1 | 116933005 | T | C,T    | T      | Heterozygous CTC subset of CPP |
| chr1 | 116939217 | C | -C,A   | -C,A   | Heterozygous CTC subset of CPP |
| chr1 | 117087010 | G | G      | G      | Heterozygous CTC subset of CPP |
| chr1 | 118486194 | T | T      | T      | Heterozygous CTC subset of CPP |
| chr1 | 118492685 | A | A      | A      | Heterozygous CTC subset of CPP |
| chr1 | 118501967 | A | A      | A      | Heterozygous CTC subset of CPP |
| chr1 | 120285546 | G | A,G    | A      | Heterozygous CTC subset of CPP |
| chr1 | 145103928 | G | A,G    | A      | Heterozygous CTC subset of CPP |
| chr1 | 146651036 | A | +G,A   | +G,A   | Heterozygous CTC subset of CPP |
| chr1 | 146736243 | G | G      | G      | Heterozygous CTC subset of CPP |
| chr1 | 146763227 | A | A      | A      | Heterozygous CTC subset of CPP |
| chr1 | 150195529 | T | T      | T      | Heterozygous CTC subset of CPP |
| chr1 | 150198938 | A | +T,A   | +T,A   | Heterozygous CTC subset of CPP |
| chr1 | 150198939 | C | +C,C,T | +C,C,T | Heterozygous CTC subset of CPP |
| chr1 | 150199051 | T | T      | T      | Heterozygous CTC subset of CPP |
| chr1 | 150199123 | G | G,T    | G      | Heterozygous CTC subset of CPP |
| chr1 | 150240525 | G | G      | G      | Heterozygous CTC subset of CPP |
| chr1 | 150305199 | G | G      | G      | Heterozygous CTC subset of CPP |
| chr1 | 150305498 | A | A      | A      | Heterozygous CTC subset of CPP |
| chr1 | 150325411 | T | T      | T      | Heterozygous CTC subset of CPP |
| chr1 | 150443984 | G | G      | G      | Heterozygous CTC subset of CPP |
| chr1 | 150444487 | A | A      | A      | Heterozygous CTC subset of CPP |

Grillet et al., Supplementary Table 5

|      |           |   |     |     |                                |
|------|-----------|---|-----|-----|--------------------------------|
| chr1 | 150444498 | A | A   | A   | Heterozygous CTC subset of CPP |
| chr1 | 150464958 | T | T   | T   | Heterozygous CTC subset of CPP |
| chr1 | 150469100 | G | G   | G   | Heterozygous CTC subset of CPP |
| chr1 | 150599995 | A | A   | A   | Heterozygous CTC subset of CPP |
| chr1 | 150636235 | T | T   | T   | Heterozygous CTC subset of CPP |
| chr1 | 150786553 | C | C   | C   | Heterozygous CTC subset of CPP |
| chr1 | 150915398 | C | C   | C   | Heterozygous CTC subset of CPP |
| chr1 | 150938571 | G | A,G | A,G | Heterozygous CTC subset of CPP |
| chr1 | 150940625 | T | G,T | G,T | Heterozygous CTC subset of CPP |
| chr1 | 151140675 | A | A   | A   | Heterozygous CTC subset of CPP |
| chr1 | 151140742 | C | C,T | C   | Heterozygous CTC subset of CPP |
| chr1 | 151149487 | A | A,G | A   | Heterozygous CTC subset of CPP |
| chr1 | 151227284 | G | G   | G   | Heterozygous CTC subset of CPP |
| chr1 | 151238575 | G | A,G | G   | Heterozygous CTC subset of CPP |
| chr1 | 151239051 | T | C,T | T   | Heterozygous CTC subset of CPP |
| chr1 | 151258887 | A | A   | A   | Heterozygous CTC subset of CPP |
| chr1 | 151259113 | G | A,G | G   | Heterozygous CTC subset of CPP |
| chr1 | 151288172 | G | A,G | G   | Heterozygous CTC subset of CPP |
| chr1 | 151314651 | A | A   | A   | Heterozygous CTC subset of CPP |
| chr1 | 151315287 | G | C,G | G   | Heterozygous CTC subset of CPP |
| chr1 | 151316689 | A | A   | A   | Heterozygous CTC subset of CPP |
| chr1 | 151372138 | G | A,G | A,G | Heterozygous CTC subset of CPP |
| chr1 | 151374025 | T | C,T | C,T | Heterozygous CTC subset of CPP |
| chr1 | 151374340 | T | G,T | T   | Heterozygous CTC subset of CPP |
| chr1 | 151377325 | A | A   | A   | Heterozygous CTC subset of CPP |
| chr1 | 151378274 | G | G   | G   | Heterozygous CTC subset of CPP |
| chr1 | 151611542 | C | C   | C   | Heterozygous CTC subset of CPP |
| chr1 | 151733327 | T | C,T | T   | Heterozygous CTC subset of CPP |
| chr1 | 151733335 | T | G,T | T   | Heterozygous CTC subset of CPP |
| chr1 | 151735576 | T | C,T | T   | Heterozygous CTC subset of CPP |
| chr1 | 153614720 | A | A   | A   | Heterozygous CTC subset of CPP |
| chr1 | 153730072 | T | T   | T   | Heterozygous CTC subset of CPP |
| chr1 | 153792099 | T | T   | T   | Heterozygous CTC subset of CPP |
| chr1 | 153907252 | T | T   | T   | Heterozygous CTC subset of CPP |
| chr1 | 153911520 | G | G   | G   | Heterozygous CTC subset of CPP |
| chr1 | 153923753 | A | A   | A   | Heterozygous CTC subset of CPP |
| chr1 | 153923754 | G | G   | G   | Heterozygous CTC subset of CPP |
| chr1 | 153948382 | C | -C  | -C  | Heterozygous CTC subset of CPP |
| chr1 | 153954646 | C | C,T | C   | Heterozygous CTC subset of CPP |
| chr1 | 153955218 | C | C,T | C   | Heterozygous CTC subset of CPP |
| chr1 | 154245917 | T | C,T | T   | Heterozygous CTC subset of CPP |
| chr1 | 154248190 | T | T   | T   | Heterozygous CTC subset of CPP |
| chr1 | 154573967 | T | C,T | C,T | Heterozygous CTC subset of CPP |
| chr1 | 154938109 | C | C,T | C   | Heterozygous CTC subset of CPP |
| chr1 | 154965476 | T | T   | T   | Heterozygous CTC subset of CPP |
| chr1 | 154987526 | C | C,T | T   | Heterozygous CTC subset of CPP |

Grillet et al., Supplementary Table 5

|      |           |   |       |       |                                |
|------|-----------|---|-------|-------|--------------------------------|
| chr1 | 155030557 | A | A,C   | A     | Heterozygous CTC subset of CPP |
| chr1 | 155180418 | G | -G,G  | -G,G  | Heterozygous CTC subset of CPP |
| chr1 | 155220938 | A | A     | A     | Heterozygous CTC subset of CPP |
| chr1 | 155223429 | T | T     | T     | Heterozygous CTC subset of CPP |
| chr1 | 155230131 | C | C,T   | C,T   | Heterozygous CTC subset of CPP |
| chr1 | 155300298 | T | T     | T     | Heterozygous CTC subset of CPP |
| chr1 | 155644805 | C | C     | C     | Heterozygous CTC subset of CPP |
| chr1 | 155657896 | A | A     | A     | Heterozygous CTC subset of CPP |
| chr1 | 155706753 | T | T     | T     | Heterozygous CTC subset of CPP |
| chr1 | 155707960 | A | A     | A     | Heterozygous CTC subset of CPP |
| chr1 | 155896945 | T | +C,T  | T     | Heterozygous CTC subset of CPP |
| chr1 | 155927633 | C | C     | C     | Heterozygous CTC subset of CPP |
| chr1 | 156011336 | G | A,G   | G     | Heterozygous CTC subset of CPP |
| chr1 | 156025096 | C | C,T   | C     | Heterozygous CTC subset of CPP |
| chr1 | 156027833 | T | T     | T     | Heterozygous CTC subset of CPP |
| chr1 | 156047056 | C | C,T   | C     | Heterozygous CTC subset of CPP |
| chr1 | 156107534 | C | C,T   | C,T   | Heterozygous CTC subset of CPP |
| chr1 | 156264356 | G | G     | G     | Heterozygous CTC subset of CPP |
| chr1 | 156290656 | T | C,T   | C,T   | Heterozygous CTC subset of CPP |
| chr1 | 156565049 | A | +AC,A | +AC,A | Heterozygous CTC subset of CPP |
| chr1 | 156565051 | G | G     | G     | Heterozygous CTC subset of CPP |
| chr1 | 156565503 | C | C     | C     | Heterozygous CTC subset of CPP |
| chr1 | 156708169 | T | T     | T     | Heterozygous CTC subset of CPP |
| chr1 | 156713558 | G | G     | G     | Heterozygous CTC subset of CPP |
| chr1 | 160187498 | G | G     | G     | Heterozygous CTC subset of CPP |
| chr1 | 160209632 | G | A,G   | G     | Heterozygous CTC subset of CPP |
| chr1 | 160209807 | C | C     | C     | Heterozygous CTC subset of CPP |
| chr1 | 160248433 | T | T     | T     | Heterozygous CTC subset of CPP |
| chr1 | 160248793 | A | A     | A     | Heterozygous CTC subset of CPP |
| chr1 | 160303416 | G | A,G   | A     | Heterozygous CTC subset of CPP |
| chr1 | 160318789 | C | C     | C     | Heterozygous CTC subset of CPP |
| chr1 | 161007752 | T | T     | T     | Heterozygous CTC subset of CPP |
| chr1 | 161007762 | A | A     | A     | Heterozygous CTC subset of CPP |
| chr1 | 161012354 | A | A     | A     | Heterozygous CTC subset of CPP |
| chr1 | 161093955 | A | A     | A     | Heterozygous CTC subset of CPP |
| chr1 | 161182208 | C | C,G   | C     | Heterozygous CTC subset of CPP |
| chr1 | 161183516 | C | C,T   | T     | Heterozygous CTC subset of CPP |
| chr1 | 161722971 | A | A     | A     | Heterozygous CTC subset of CPP |
| chr1 | 161751741 | A | A,G   | A     | Heterozygous CTC subset of CPP |
| chr1 | 161833072 | A | A     | A     | Heterozygous CTC subset of CPP |
| chr1 | 161928308 | T | T     | T     | Heterozygous CTC subset of CPP |
| chr1 | 162470817 | T | T     | T     | Heterozygous CTC subset of CPP |
| chr1 | 165619079 | C | C,T   | C     | Heterozygous CTC subset of CPP |
| chr1 | 165621272 | G | G     | G     | Heterozygous CTC subset of CPP |
| chr1 | 165624755 | T | T     | T     | Heterozygous CTC subset of CPP |
| chr1 | 165652273 | A | A,G   | G     | Heterozygous CTC subset of CPP |

Grillet et al., Supplementary Table 5

|      |           |   |      |      |                                |
|------|-----------|---|------|------|--------------------------------|
| chr1 | 165696799 | T | T    | T    | Heterozygous CTC subset of CPP |
| chr1 | 165696836 | G | +A,G | G    | Heterozygous CTC subset of CPP |
| chr1 | 166818566 | A | A,G  | A    | Heterozygous CTC subset of CPP |
| chr1 | 167522733 | G | G    | G    | Heterozygous CTC subset of CPP |
| chr1 | 168013850 | T | C,T  | C,T  | Heterozygous CTC subset of CPP |
| chr1 | 168044669 | A | A    | A    | Heterozygous CTC subset of CPP |
| chr1 | 171484935 | G | G    | G    | Heterozygous CTC subset of CPP |
| chr1 | 171492446 | T | T    | T    | Heterozygous CTC subset of CPP |
| chr1 | 171511148 | G | G    | G    | Heterozygous CTC subset of CPP |
| chr1 | 171519316 | C | C    | C    | Heterozygous CTC subset of CPP |
| chr1 | 171526910 | G | A,G  | G    | Heterozygous CTC subset of CPP |
| chr1 | 171553212 | T | T    | T    | Heterozygous CTC subset of CPP |
| chr1 | 171557600 | A | A,G  | A    | Heterozygous CTC subset of CPP |
| chr1 | 171750854 | C | C    | C    | Heterozygous CTC subset of CPP |
| chr1 | 171751236 | T | C,T  | C,T  | Heterozygous CTC subset of CPP |
| chr1 | 171753039 | A | A,G  | A,G  | Heterozygous CTC subset of CPP |
| chr1 | 171755071 | A | A,G  | A    | Heterozygous CTC subset of CPP |
| chr1 | 171755170 | G | A,G  | A,G  | Heterozygous CTC subset of CPP |
| chr1 | 171755182 | G | A,G  | G    | Heterozygous CTC subset of CPP |
| chr1 | 171763549 | C | C,T  | C    | Heterozygous CTC subset of CPP |
| chr1 | 172410967 | G | A,G  | A    | Heterozygous CTC subset of CPP |
| chr1 | 172411215 | A | A    | A    | Heterozygous CTC subset of CPP |
| chr1 | 172411473 | T | T    | T    | Heterozygous CTC subset of CPP |
| chr1 | 172411474 | A | A    | A    | Heterozygous CTC subset of CPP |
| chr1 | 172411496 | A | A,G  | G    | Heterozygous CTC subset of CPP |
| chr1 | 173797473 | A | A    | A    | Heterozygous CTC subset of CPP |
| chr1 | 173835115 | G | G    | G    | Heterozygous CTC subset of CPP |
| chr1 | 173835116 | A | A    | A    | Heterozygous CTC subset of CPP |
| chr1 | 174969271 | C | C,T  | C,T  | Heterozygous CTC subset of CPP |
| chr1 | 174973945 | T | T    | T    | Heterozygous CTC subset of CPP |
| chr1 | 179013204 | G | A,G  | G    | Heterozygous CTC subset of CPP |
| chr1 | 179023715 | T | T    | T    | Heterozygous CTC subset of CPP |
| chr1 | 179820317 | A | A    | A    | Heterozygous CTC subset of CPP |
| chr1 | 179820498 | T | +C,T | +C,T | Heterozygous CTC subset of CPP |
| chr1 | 179877780 | A | A,C  | A    | Heterozygous CTC subset of CPP |
| chr1 | 179886667 | T | T    | T    | Heterozygous CTC subset of CPP |
| chr1 | 179886669 | T | T    | T    | Heterozygous CTC subset of CPP |
| chr1 | 180124061 | G | C,G  | G    | Heterozygous CTC subset of CPP |
| chr1 | 180158808 | A | A    | A    | Heterozygous CTC subset of CPP |
| chr1 | 180159654 | C | C,T  | C    | Heterozygous CTC subset of CPP |
| chr1 | 180159657 | C | C,T  | C    | Heterozygous CTC subset of CPP |
| chr1 | 180257463 | A | A    | A    | Heterozygous CTC subset of CPP |
| chr1 | 181058548 | T | T    | T    | Heterozygous CTC subset of CPP |
| chr1 | 181058891 | C | C,T  | C    | Heterozygous CTC subset of CPP |
| chr1 | 182356270 | A | A    | A    | Heterozygous CTC subset of CPP |
| chr1 | 182356399 | A | A,G  | A,G  | Heterozygous CTC subset of CPP |

Grillet et al., Supplementary Table 5

|      |           |   |      |      |                                |
|------|-----------|---|------|------|--------------------------------|
| chr1 | 182845658 | A | A    | A    | Heterozygous CTC subset of CPP |
| chr1 | 183099684 | G | G    | G    | Heterozygous CTC subset of CPP |
| chr1 | 183104251 | T | T    | T    | Heterozygous CTC subset of CPP |
| chr1 | 183105705 | G | A,G  | A    | Heterozygous CTC subset of CPP |
| chr1 | 183485100 | T | T    | T    | Heterozygous CTC subset of CPP |
| chr1 | 183498142 | T | T    | T    | Heterozygous CTC subset of CPP |
| chr1 | 184588654 | T | T    | T    | Heterozygous CTC subset of CPP |
| chr1 | 185268902 | A | A    | A    | Heterozygous CTC subset of CPP |
| chr1 | 185278616 | T | T    | T    | Heterozygous CTC subset of CPP |
| chr1 | 186316488 | C | C,T  | C    | Heterozygous CTC subset of CPP |
| chr1 | 186320484 | T | T    | T    | Heterozygous CTC subset of CPP |
| chr1 | 186321242 | C | C,T  | C    | Heterozygous CTC subset of CPP |
| chr1 | 193028406 | C | C,T  | C    | Heterozygous CTC subset of CPP |
| chr1 | 193066825 | T | T    | T    | Heterozygous CTC subset of CPP |
| chr1 | 200819176 | C | C    | C    | Heterozygous CTC subset of CPP |
| chr1 | 201112981 | A | A,G  | G    | Heterozygous CTC subset of CPP |
| chr1 | 201355522 | T | C,T  | C,T  | Heterozygous CTC subset of CPP |
| chr1 | 201355653 | G | G,T  | G    | Heterozygous CTC subset of CPP |
| chr1 | 201355761 | A | A,G  | A    | Heterozygous CTC subset of CPP |
| chr1 | 201355943 | C | C,T  | C,T  | Heterozygous CTC subset of CPP |
| chr1 | 201843479 | A | A    | A    | Heterozygous CTC subset of CPP |
| chr1 | 201969082 | G | A,G  | A    | Heterozygous CTC subset of CPP |
| chr1 | 201973565 | G | A,G  | G    | Heterozygous CTC subset of CPP |
| chr1 | 202304868 | T | C,T  | C,T  | Heterozygous CTC subset of CPP |
| chr1 | 202729632 | A | A    | A    | Heterozygous CTC subset of CPP |
| chr1 | 202736057 | T | T    | T    | Heterozygous CTC subset of CPP |
| chr1 | 202742246 | C | C    | C    | Heterozygous CTC subset of CPP |
| chr1 | 202976969 | A | A    | A    | Heterozygous CTC subset of CPP |
| chr1 | 202977886 | A | A    | A    | Heterozygous CTC subset of CPP |
| chr1 | 202977912 | G | G    | G    | Heterozygous CTC subset of CPP |
| chr1 | 202977926 | A | A    | A    | Heterozygous CTC subset of CPP |
| chr1 | 203816536 | C | +A,C | +A,C | Heterozygous CTC subset of CPP |
| chr1 | 203818973 | C | A,C  | C    | Heterozygous CTC subset of CPP |
| chr1 | 203821444 | A | A    | A    | Heterozygous CTC subset of CPP |
| chr1 | 203821470 | T | T    | T    | Heterozygous CTC subset of CPP |
| chr1 | 204379452 | T | C,T  | T    | Heterozygous CTC subset of CPP |
| chr1 | 205589574 | C | C,T  | C,T  | Heterozygous CTC subset of CPP |
| chr1 | 207498071 | T | T    | T    | Heterozygous CTC subset of CPP |
| chr1 | 207532916 | T | T    | T    | Heterozygous CTC subset of CPP |
| chr1 | 207934791 | G | G    | G    | Heterozygous CTC subset of CPP |
| chr1 | 207958446 | C | C    | C    | Heterozygous CTC subset of CPP |
| chr1 | 210004332 | G | A,G  | G    | Heterozygous CTC subset of CPP |
| chr1 | 211836789 | T | C,T  | T    | Heterozygous CTC subset of CPP |
| chr1 | 211846876 | A | A,G  | A    | Heterozygous CTC subset of CPP |
| chr1 | 212502513 | A | A    | A    | Heterozygous CTC subset of CPP |
| chr1 | 212515613 | C | C,T  | C,T  | Heterozygous CTC subset of CPP |

Grillet et al., Supplementary Table 5

|      |           |   |     |     |                                |
|------|-----------|---|-----|-----|--------------------------------|
| chr1 | 212530579 | A | A   | A   | Heterozygous CTC subset of CPP |
| chr1 | 212911836 | T | C,T | C,T | Heterozygous CTC subset of CPP |
| chr1 | 214813562 | A | A   | A   | Heterozygous CTC subset of CPP |
| chr1 | 214813935 | T | T   | T   | Heterozygous CTC subset of CPP |
| chr1 | 214818825 | C | C   | C   | Heterozygous CTC subset of CPP |
| chr1 | 214820099 | A | A,G | A,G | Heterozygous CTC subset of CPP |
| chr1 | 214828590 | A | A   | A   | Heterozygous CTC subset of CPP |
| chr1 | 214837110 | C | C,G | G   | Heterozygous CTC subset of CPP |
| chr1 | 215768775 | A | A   | A   | Heterozygous CTC subset of CPP |
| chr1 | 215781423 | T | T   | T   | Heterozygous CTC subset of CPP |
| chr1 | 220154768 | C | C,T | T   | Heterozygous CTC subset of CPP |
| chr1 | 220208352 | A | A   | A   | Heterozygous CTC subset of CPP |
| chr1 | 222802927 | G | G   | G   | Heterozygous CTC subset of CPP |
| chr1 | 222818952 | A | A   | A   | Heterozygous CTC subset of CPP |
| chr1 | 222903421 | T | T   | T   | Heterozygous CTC subset of CPP |
| chr1 | 222906036 | A | A   | A   | Heterozygous CTC subset of CPP |
| chr1 | 223954080 | A | A,C | A   | Heterozygous CTC subset of CPP |
| chr1 | 224321794 | A | A   | A   | Heterozygous CTC subset of CPP |
| chr1 | 225592199 | T | T   | T   | Heterozygous CTC subset of CPP |
| chr1 | 225600169 | C | C,T | C   | Heterozygous CTC subset of CPP |
| chr1 | 225607144 | C | C,T | T   | Heterozygous CTC subset of CPP |
| chr1 | 225609884 | A | A,G | G   | Heterozygous CTC subset of CPP |
| chr1 | 225611661 | C | C,T | T   | Heterozygous CTC subset of CPP |
| chr1 | 225702505 | A | A   | A   | Heterozygous CTC subset of CPP |
| chr1 | 225704987 | G | G,T | G   | Heterozygous CTC subset of CPP |
| chr1 | 226019653 | G | A,G | G   | Heterozygous CTC subset of CPP |
| chr1 | 226026406 | A | A,G | A   | Heterozygous CTC subset of CPP |
| chr1 | 226027659 | C | C,T | C   | Heterozygous CTC subset of CPP |
| chr1 | 226032229 | C | C,T | C   | Heterozygous CTC subset of CPP |
| chr1 | 226033030 | G | C,G | G   | Heterozygous CTC subset of CPP |
| chr1 | 226109284 | G | A,G | G   | Heterozygous CTC subset of CPP |
| chr1 | 226175829 | A | A   | A   | Heterozygous CTC subset of CPP |
| chr1 | 226352498 | T | G,T | G   | Heterozygous CTC subset of CPP |
| chr1 | 226552709 | C | C,T | C   | Heterozygous CTC subset of CPP |
| chr1 | 227174210 | T | C,T | C,T | Heterozygous CTC subset of CPP |
| chr1 | 227935444 | A | A,G | A,G | Heterozygous CTC subset of CPP |
| chr1 | 227968367 | T | T   | T   | Heterozygous CTC subset of CPP |
| chr1 | 228290641 | T | T   | T   | Heterozygous CTC subset of CPP |
| chr1 | 228290749 | G | G   | G   | Heterozygous CTC subset of CPP |
| chr1 | 228879176 | A | A   | A   | Heterozygous CTC subset of CPP |
| chr1 | 229584935 | T | T   | T   | Heterozygous CTC subset of CPP |
| chr1 | 229593936 | T | T   | T   | Heterozygous CTC subset of CPP |
| chr1 | 229730704 | A | A   | A   | Heterozygous CTC subset of CPP |
| chr1 | 230825865 | T | T   | T   | Heterozygous CTC subset of CPP |
| chr1 | 230975611 | A | A   | A   | Heterozygous CTC subset of CPP |
| chr1 | 231377081 | C | C,T | T   | Heterozygous CTC subset of CPP |

Grillet et al., Supplementary Table 5

|       |           |   |     |     |                                |
|-------|-----------|---|-----|-----|--------------------------------|
| chr1  | 231406535 | C | C   | C   | Heterozygous CTC subset of CPP |
| chr1  | 231509810 | A | A   | A   | Heterozygous CTC subset of CPP |
| chr1  | 231700643 | A | A   | A   | Heterozygous CTC subset of CPP |
| chr1  | 233086456 | T | C,T | T   | Heterozygous CTC subset of CPP |
| chr1  | 234509259 | G | C,G | G   | Heterozygous CTC subset of CPP |
| chr1  | 234529552 | C | C,T | C   | Heterozygous CTC subset of CPP |
| chr1  | 234743237 | G | A,G | G   | Heterozygous CTC subset of CPP |
| chr1  | 234744413 | C | A,C | A,C | Heterozygous CTC subset of CPP |
| chr1  | 235291918 | A | A,C | A   | Heterozygous CTC subset of CPP |
| chr1  | 235291919 | G | G   | G   | Heterozygous CTC subset of CPP |
| chr1  | 235295163 | T | T   | T   | Heterozygous CTC subset of CPP |
| chr1  | 235298987 | A | A   | A   | Heterozygous CTC subset of CPP |
| chr1  | 235505567 | T | T   | T   | Heterozygous CTC subset of CPP |
| chr1  | 235611767 | A | A   | A   | Heterozygous CTC subset of CPP |
| chr1  | 236716929 | T | T   | T   | Heterozygous CTC subset of CPP |
| chr1  | 236716959 | C | C,T | C,T | Heterozygous CTC subset of CPP |
| chr1  | 236717926 | T | C,T | C,T | Heterozygous CTC subset of CPP |
| chr1  | 236719135 | T | C,T | C   | Heterozygous CTC subset of CPP |
| chr1  | 236719193 | A | A,G | A,G | Heterozygous CTC subset of CPP |
| chr1  | 236721660 | T | C,T | C,T | Heterozygous CTC subset of CPP |
| chr1  | 236730079 | T | T   | T   | Heterozygous CTC subset of CPP |
| chr1  | 236748401 | T | T   | T   | Heterozygous CTC subset of CPP |
| chr1  | 236748433 | G | A,G | G   | Heterozygous CTC subset of CPP |
| chr1  | 244600975 | T | T   | T   | Heterozygous CTC subset of CPP |
| chr1  | 245027349 | C | C,T | C,T | Heterozygous CTC subset of CPP |
| chr1  | 246727702 | A | A   | A   | Heterozygous CTC subset of CPP |
| chr1  | 246907426 | A | A   | A   | Heterozygous CTC subset of CPP |
| chr1  | 246921560 | A | A   | A   | Heterozygous CTC subset of CPP |
| chr10 | 909822    | T | T   | T   | Heterozygous CTC subset of CPP |
| chr10 | 1034412   | C | C,T | C   | Heterozygous CTC subset of CPP |
| chr10 | 3180227   | T | C,T | C,T | Heterozygous CTC subset of CPP |
| chr10 | 3200249   | C | C,T | C,T | Heterozygous CTC subset of CPP |
| chr10 | 3200292   | G | A,G | A,G | Heterozygous CTC subset of CPP |
| chr10 | 3202065   | T | C,T | C,T | Heterozygous CTC subset of CPP |
| chr10 | 3206027   | A | A,G | A,G | Heterozygous CTC subset of CPP |
| chr10 | 3208557   | A | A,G | A,G | Heterozygous CTC subset of CPP |
| chr10 | 3819714   | C | C,T | C   | Heterozygous CTC subset of CPP |
| chr10 | 3820362   | A | A   | A   | Heterozygous CTC subset of CPP |
| chr10 | 3820670   | A | A   | A   | Heterozygous CTC subset of CPP |
| chr10 | 3820787   | T | C,T | T   | Heterozygous CTC subset of CPP |
| chr10 | 3821026   | T | T   | T   | Heterozygous CTC subset of CPP |
| chr10 | 3821280   | C | C   | C   | Heterozygous CTC subset of CPP |
| chr10 | 3821282   | C | C   | C   | Heterozygous CTC subset of CPP |
| chr10 | 3821402   | A | A   | A   | Heterozygous CTC subset of CPP |
| chr10 | 3821561   | G | A,G | G   | Heterozygous CTC subset of CPP |
| chr10 | 5789826   | T | T   | T   | Heterozygous CTC subset of CPP |

Grillet et al., Supplementary Table 5

|       |          |   |     |     |                                |
|-------|----------|---|-----|-----|--------------------------------|
| chr10 | 5791281  | T | T   | T   | Heterozygous CTC subset of CPP |
| chr10 | 5808086  | G | A,G | G   | Heterozygous CTC subset of CPP |
| chr10 | 5955721  | A | A   | A   | Heterozygous CTC subset of CPP |
| chr10 | 5960340  | A | A   | A   | Heterozygous CTC subset of CPP |
| chr10 | 6131155  | G | G,T | G   | Heterozygous CTC subset of CPP |
| chr10 | 7820853  | G | G   | G   | Heterozygous CTC subset of CPP |
| chr10 | 7820925  | T | T   | T   | Heterozygous CTC subset of CPP |
| chr10 | 7841987  | T | -T  | -T  | Heterozygous CTC subset of CPP |
| chr10 | 11504670 | T | T   | T   | Heterozygous CTC subset of CPP |
| chr10 | 11505175 | A | A,G | G   | Heterozygous CTC subset of CPP |
| chr10 | 11978601 | A | A   | A   | Heterozygous CTC subset of CPP |
| chr10 | 12043804 | T | T   | T   | Heterozygous CTC subset of CPP |
| chr10 | 12043820 | T | T   | T   | Heterozygous CTC subset of CPP |
| chr10 | 12071302 | A | A   | A   | Heterozygous CTC subset of CPP |
| chr10 | 12077197 | C | C   | C   | Heterozygous CTC subset of CPP |
| chr10 | 12209752 | T | C,T | T   | Heterozygous CTC subset of CPP |
| chr10 | 12226933 | A | A   | A   | Heterozygous CTC subset of CPP |
| chr10 | 12292344 | A | A,G | G   | Heterozygous CTC subset of CPP |
| chr10 | 12292348 | G | G,T | G   | Heterozygous CTC subset of CPP |
| chr10 | 12292454 | A | A,G | G   | Heterozygous CTC subset of CPP |
| chr10 | 13152359 | G | G   | G   | Heterozygous CTC subset of CPP |
| chr10 | 13361291 | T | T   | T   | Heterozygous CTC subset of CPP |
| chr10 | 13375906 | T | C,T | C   | Heterozygous CTC subset of CPP |
| chr10 | 13639493 | C | C   | C   | Heterozygous CTC subset of CPP |
| chr10 | 14885823 | A | A   | A   | Heterozygous CTC subset of CPP |
| chr10 | 14939060 | T | T   | T   | Heterozygous CTC subset of CPP |
| chr10 | 14943176 | C | C,G | C   | Heterozygous CTC subset of CPP |
| chr10 | 16794623 | C | C,T | C   | Heterozygous CTC subset of CPP |
| chr10 | 16794993 | A | A   | A   | Heterozygous CTC subset of CPP |
| chr10 | 17737138 | A | A   | A   | Heterozygous CTC subset of CPP |
| chr10 | 17737158 | C | C   | C   | Heterozygous CTC subset of CPP |
| chr10 | 17750835 | C | C   | C   | Heterozygous CTC subset of CPP |
| chr10 | 18964164 | A | A   | A   | Heterozygous CTC subset of CPP |
| chr10 | 23408278 | C | C,T | C,T | Heterozygous CTC subset of CPP |
| chr10 | 27821498 | T | T   | T   | Heterozygous CTC subset of CPP |
| chr10 | 28879761 | A | A   | A   | Heterozygous CTC subset of CPP |
| chr10 | 30629226 | G | A,G | G   | Heterozygous CTC subset of CPP |
| chr10 | 32098018 | T | T   | T   | Heterozygous CTC subset of CPP |
| chr10 | 32120677 | T | T   | T   | Heterozygous CTC subset of CPP |
| chr10 | 33200481 | C | C   | C   | Heterozygous CTC subset of CPP |
| chr10 | 33211607 | T | T   | T   | Heterozygous CTC subset of CPP |
| chr10 | 33214802 | A | A   | A   | Heterozygous CTC subset of CPP |
| chr10 | 34649028 | A | A   | A   | Heterozygous CTC subset of CPP |
| chr10 | 35318443 | T | T   | T   | Heterozygous CTC subset of CPP |
| chr10 | 35333593 | T | T   | T   | Heterozygous CTC subset of CPP |
| chr10 | 35772402 | G | A,G | A,G | Heterozygous CTC subset of CPP |



Grillet et al., Supplementary Table 5

|       |          |   |     |     |                                |
|-------|----------|---|-----|-----|--------------------------------|
| chr10 | 35842104 | T | T   | T   | Heterozygous CTC subset of CPP |
| chr10 | 43281089 | T | C,T | C,T | Heterozygous CTC subset of CPP |
| chr10 | 43292434 | A | A   | A   | Heterozygous CTC subset of CPP |
| chr10 | 43292647 | A | A,G | A,G | Heterozygous CTC subset of CPP |
| chr10 | 43317530 | T | T   | T   | Heterozygous CTC subset of CPP |
| chr10 | 43319197 | G | A,G | A,G | Heterozygous CTC subset of CPP |
| chr10 | 45498843 | T | T   | T   | Heterozygous CTC subset of CPP |
| chr10 | 45499379 | T | T   | T   | Heterozygous CTC subset of CPP |
| chr10 | 53457900 | A | A   | A   | Heterozygous CTC subset of CPP |
| chr10 | 53458815 | A | A   | A   | Heterozygous CTC subset of CPP |
| chr10 | 58118630 | T | C,T | C   | Heterozygous CTC subset of CPP |
| chr10 | 61552692 | G | G,T | G,T | Heterozygous CTC subset of CPP |
| chr10 | 61552774 | C | C,T | C,T | Heterozygous CTC subset of CPP |
| chr10 | 61552868 | C | C   | C   | Heterozygous CTC subset of CPP |
| chr10 | 61566836 | T | T   | T   | Heterozygous CTC subset of CPP |
| chr10 | 61665886 | C | A,C | A   | Heterozygous CTC subset of CPP |
| chr10 | 64950655 | G | G   | G   | Heterozygous CTC subset of CPP |
| chr10 | 65357838 | C | C,T | C   | Heterozygous CTC subset of CPP |
| chr10 | 65379546 | A | A   | A   | Heterozygous CTC subset of CPP |
| chr10 | 69676284 | A | A   | A   | Heterozygous CTC subset of CPP |
| chr10 | 70098400 | G | G   | G   | Heterozygous CTC subset of CPP |
| chr10 | 70482242 | G | G   | G   | Heterozygous CTC subset of CPP |
| chr10 | 70666562 | C | C   | C   | Heterozygous CTC subset of CPP |
| chr10 | 70673268 | T | T   | T   | Heterozygous CTC subset of CPP |
| chr10 | 70719704 | C | C   | C   | Heterozygous CTC subset of CPP |
| chr10 | 70748977 | T | T   | T   | Heterozygous CTC subset of CPP |
| chr10 | 70775676 | T | T   | T   | Heterozygous CTC subset of CPP |
| chr10 | 70775877 | T | T   | T   | Heterozygous CTC subset of CPP |
| chr10 | 70916902 | T | T   | T   | Heterozygous CTC subset of CPP |
| chr10 | 70956827 | G | G   | G   | Heterozygous CTC subset of CPP |
| chr10 | 70960225 | A | A   | A   | Heterozygous CTC subset of CPP |
| chr10 | 71264240 | A | A   | A   | Heterozygous CTC subset of CPP |
| chr10 | 71874084 | A | A   | A   | Heterozygous CTC subset of CPP |
| chr10 | 71876459 | T | T   | T   | Heterozygous CTC subset of CPP |
| chr10 | 71880895 | A | A   | A   | Heterozygous CTC subset of CPP |
| chr10 | 71883202 | T | T   | T   | Heterozygous CTC subset of CPP |
| chr10 | 71902439 | A | A   | A   | Heterozygous CTC subset of CPP |
| chr10 | 71993094 | T | G,T | G,T | Heterozygous CTC subset of CPP |
| chr10 | 72636992 | A | A   | A   | Heterozygous CTC subset of CPP |
| chr10 | 72648336 | C | C,T | C   | Heterozygous CTC subset of CPP |
| chr10 | 74094338 | A | A   | A   | Heterozygous CTC subset of CPP |
| chr10 | 74100566 | C | C,T | C   | Heterozygous CTC subset of CPP |
| chr10 | 74103267 | A | A   | A   | Heterozygous CTC subset of CPP |
| chr10 | 74776640 | A | A   | A   | Heterozygous CTC subset of CPP |
| chr10 | 74813153 | T | T   | T   | Heterozygous CTC subset of CPP |
| chr10 | 74831873 | T | T   | T   | Heterozygous CTC subset of CPP |

Grillet et al., Supplementary Table 5

|       |          |   |        |        |                                |
|-------|----------|---|--------|--------|--------------------------------|
| chr10 | 74899408 | A | A      | A      | Heterozygous CTC subset of CPP |
| chr10 | 74923562 | C | C      | C      | Heterozygous CTC subset of CPP |
| chr10 | 75006804 | A | A      | A      | Heterozygous CTC subset of CPP |
| chr10 | 75525326 | T | T      | T      | Heterozygous CTC subset of CPP |
| chr10 | 75526214 | G | G      | G      | Heterozygous CTC subset of CPP |
| chr10 | 75528910 | G | G      | G      | Heterozygous CTC subset of CPP |
| chr10 | 75530111 | A | A      | A      | Heterozygous CTC subset of CPP |
| chr10 | 75854162 | A | A      | A      | Heterozygous CTC subset of CPP |
| chr10 | 75857020 | A | A      | A      | Heterozygous CTC subset of CPP |
| chr10 | 75897995 | A | A      | A      | Heterozygous CTC subset of CPP |
| chr10 | 79570948 | C | C      | C      | Heterozygous CTC subset of CPP |
| chr10 | 79584178 | G | C,G    | C,G    | Heterozygous CTC subset of CPP |
| chr10 | 79741275 | T | T      | T      | Heterozygous CTC subset of CPP |
| chr10 | 79741287 | G | G      | G      | Heterozygous CTC subset of CPP |
| chr10 | 79753000 | T | T      | T      | Heterozygous CTC subset of CPP |
| chr10 | 79795108 | A | +T,A   | +T,A   | Heterozygous CTC subset of CPP |
| chr10 | 79795109 | G | +G,G,T | +G,G,T | Heterozygous CTC subset of CPP |
| chr10 | 79799981 | C | C      | C      | Heterozygous CTC subset of CPP |
| chr10 | 88213439 | A | A      | A      | Heterozygous CTC subset of CPP |
| chr10 | 88230792 | A | A      | A      | Heterozygous CTC subset of CPP |
| chr10 | 88259875 | A | A      | A      | Heterozygous CTC subset of CPP |
| chr10 | 88260107 | C | C      | C      | Heterozygous CTC subset of CPP |
| chr10 | 91518557 | T | T      | T      | Heterozygous CTC subset of CPP |
| chr10 | 92631775 | C | C,T    | C      | Heterozygous CTC subset of CPP |
| chr10 | 92635783 | A | A      | A      | Heterozygous CTC subset of CPP |
| chr10 | 92660434 | T | T      | T      | Heterozygous CTC subset of CPP |
| chr10 | 93617232 | A | A      | A      | Heterozygous CTC subset of CPP |
| chr10 | 93786418 | G | G      | G      | Heterozygous CTC subset of CPP |
| chr10 | 93786950 | T | T      | T      | Heterozygous CTC subset of CPP |
| chr10 | 94110922 | A | A      | A      | Heterozygous CTC subset of CPP |
| chr10 | 94653186 | A | A      | A      | Heterozygous CTC subset of CPP |
| chr10 | 95259979 | C | C,G    | C      | Heterozygous CTC subset of CPP |
| chr10 | 95276954 | T | T      | T      | Heterozygous CTC subset of CPP |
| chr10 | 95279506 | A | A,T    | T      | Heterozygous CTC subset of CPP |
| chr10 | 95452484 | T | T      | T      | Heterozygous CTC subset of CPP |
| chr10 | 95459863 | T | T      | T      | Heterozygous CTC subset of CPP |
| chr10 | 95718748 | A | A,G    | A      | Heterozygous CTC subset of CPP |
| chr10 | 95718949 | C | C,T    | C      | Heterozygous CTC subset of CPP |
| chr10 | 95720069 | A | A      | A      | Heterozygous CTC subset of CPP |
| chr10 | 96121505 | T | C,T    | T      | Heterozygous CTC subset of CPP |
| chr10 | 97366699 | T | T      | T      | Heterozygous CTC subset of CPP |
| chr10 | 97371146 | G | A,G    | G      | Heterozygous CTC subset of CPP |
| chr10 | 97423947 | T | T      | T      | Heterozygous CTC subset of CPP |
| chr10 | 98287792 | G | G,T    | T      | Heterozygous CTC subset of CPP |
| chr10 | 99116903 | C | C,T    | C      | Heterozygous CTC subset of CPP |
| chr10 | 99125949 | C | C,T    | C,T    | Heterozygous CTC subset of CPP |

Grillet et al., Supplementary Table 5

|       |           |   |     |     |                                |
|-------|-----------|---|-----|-----|--------------------------------|
| chr10 | 99126249  | G | A,G | G   | Heterozygous CTC subset of CPP |
| chr10 | 99133465  | T | T   | T   | Heterozygous CTC subset of CPP |
| chr10 | 99155984  | G | A,G | A,G | Heterozygous CTC subset of CPP |
| chr10 | 99160152  | A | A,G | A,G | Heterozygous CTC subset of CPP |
| chr10 | 99196195  | T | T   | T   | Heterozygous CTC subset of CPP |
| chr10 | 99211653  | A | A,T | A   | Heterozygous CTC subset of CPP |
| chr10 | 99225606  | T | T   | T   | Heterozygous CTC subset of CPP |
| chr10 | 101486769 | T | T   | T   | Heterozygous CTC subset of CPP |
| chr10 | 102046380 | T | T   | T   | Heterozygous CTC subset of CPP |
| chr10 | 102107251 | C | C,G | C,G | Heterozygous CTC subset of CPP |
| chr10 | 102116311 | A | A,C | A,C | Heterozygous CTC subset of CPP |
| chr10 | 102296412 | A | A   | A   | Heterozygous CTC subset of CPP |
| chr10 | 102766797 | A | A   | A   | Heterozygous CTC subset of CPP |
| chr10 | 102794449 | A | A   | A   | Heterozygous CTC subset of CPP |
| chr10 | 102794600 | T | T   | T   | Heterozygous CTC subset of CPP |
| chr10 | 102796253 | A | A   | A   | Heterozygous CTC subset of CPP |
| chr10 | 103339322 | T | T   | T   | Heterozygous CTC subset of CPP |
| chr10 | 103361015 | T | T   | T   | Heterozygous CTC subset of CPP |
| chr10 | 103368654 | T | C,T | C   | Heterozygous CTC subset of CPP |
| chr10 | 103369173 | A | A   | A   | Heterozygous CTC subset of CPP |
| chr10 | 103552661 | G | G   | G   | Heterozygous CTC subset of CPP |
| chr10 | 103919067 | T | A,T | T   | Heterozygous CTC subset of CPP |
| chr10 | 103919298 | C | C   | C   | Heterozygous CTC subset of CPP |
| chr10 | 104182655 | G | G   | G   | Heterozygous CTC subset of CPP |
| chr10 | 104183933 | T | T   | T   | Heterozygous CTC subset of CPP |
| chr10 | 104465183 | G | G   | G   | Heterozygous CTC subset of CPP |
| chr10 | 104849468 | G | A,G | A,G | Heterozygous CTC subset of CPP |
| chr10 | 105151954 | T | T   | T   | Heterozygous CTC subset of CPP |
| chr10 | 105160212 | C | C   | C   | Heterozygous CTC subset of CPP |
| chr10 | 105169563 | A | A   | A   | Heterozygous CTC subset of CPP |
| chr10 | 105174869 | G | A,G | A,G | Heterozygous CTC subset of CPP |
| chr10 | 105178237 | T | T   | T   | Heterozygous CTC subset of CPP |
| chr10 | 105204436 | T | T   | T   | Heterozygous CTC subset of CPP |
| chr10 | 105758990 | C | C   | C   | Heterozygous CTC subset of CPP |
| chr10 | 105762029 | G | G   | G   | Heterozygous CTC subset of CPP |
| chr10 | 106022789 | C | A,C | A,C | Heterozygous CTC subset of CPP |
| chr10 | 112039744 | T | T   | T   | Heterozygous CTC subset of CPP |
| chr10 | 112039809 | A | A   | A   | Heterozygous CTC subset of CPP |
| chr10 | 112057349 | T | T   | T   | Heterozygous CTC subset of CPP |
| chr10 | 112063263 | T | T   | T   | Heterozygous CTC subset of CPP |
| chr10 | 112360812 | T | T   | T   | Heterozygous CTC subset of CPP |
| chr10 | 112641053 | A | A,G | G   | Heterozygous CTC subset of CPP |
| chr10 | 112645088 | G | A,G | G   | Heterozygous CTC subset of CPP |
| chr10 | 112647577 | A | A   | A   | Heterozygous CTC subset of CPP |
| chr10 | 112724283 | A | A   | A   | Heterozygous CTC subset of CPP |
| chr10 | 114192027 | T | T   | T   | Heterozygous CTC subset of CPP |

Grillet et al., Supplementary Table 5

|       |           |   |     |     |                                |
|-------|-----------|---|-----|-----|--------------------------------|
| chr10 | 114194134 | A | A   | A   | Heterozygous CTC subset of CPP |
| chr10 | 114200453 | G | G   | G   | Heterozygous CTC subset of CPP |
| chr10 | 114205188 | T | T   | T   | Heterozygous CTC subset of CPP |
| chr10 | 114205189 | A | A   | A   | Heterozygous CTC subset of CPP |
| chr10 | 115489152 | C | C,G | C   | Heterozygous CTC subset of CPP |
| chr10 | 115905497 | T | T   | T   | Heterozygous CTC subset of CPP |
| chr10 | 115933905 | C | C,T | C   | Heterozygous CTC subset of CPP |
| chr10 | 116049129 | G | G   | G   | Heterozygous CTC subset of CPP |
| chr10 | 116710900 | G | G   | G   | Heterozygous CTC subset of CPP |
| chr10 | 116719543 | G | A,G | A,G | Heterozygous CTC subset of CPP |
| chr10 | 116730156 | A | A   | A   | Heterozygous CTC subset of CPP |
| chr10 | 116731920 | A | A   | A   | Heterozygous CTC subset of CPP |
| chr10 | 118674968 | T | T   | T   | Heterozygous CTC subset of CPP |
| chr10 | 118713596 | G | G   | G   | Heterozygous CTC subset of CPP |
| chr10 | 119042909 | T | T   | T   | Heterozygous CTC subset of CPP |
| chr10 | 119043797 | T | T   | T   | Heterozygous CTC subset of CPP |
| chr10 | 119100535 | T | T   | T   | Heterozygous CTC subset of CPP |
| chr10 | 119133939 | A | A   | A   | Heterozygous CTC subset of CPP |
| chr10 | 120489879 | C | C   | C   | Heterozygous CTC subset of CPP |
| chr10 | 120514015 | A | A   | A   | Heterozygous CTC subset of CPP |
| chr10 | 120914609 | T | T   | T   | Heterozygous CTC subset of CPP |
| chr10 | 120933324 | G | A,G | A   | Heterozygous CTC subset of CPP |
| chr10 | 121285629 | T | T   | T   | Heterozygous CTC subset of CPP |
| chr10 | 121411192 | G | G   | G   | Heterozygous CTC subset of CPP |
| chr10 | 121432130 | T | T   | T   | Heterozygous CTC subset of CPP |
| chr10 | 121436082 | T | T   | T   | Heterozygous CTC subset of CPP |
| chr10 | 121595107 | A | A   | A   | Heterozygous CTC subset of CPP |
| chr10 | 121671628 | A | A   | A   | Heterozygous CTC subset of CPP |
| chr10 | 121677518 | A | A   | A   | Heterozygous CTC subset of CPP |
| chr10 | 121677966 | T | T   | T   | Heterozygous CTC subset of CPP |
| chr10 | 121692615 | C | C   | C   | Heterozygous CTC subset of CPP |
| chr10 | 122619656 | G | G   | G   | Heterozygous CTC subset of CPP |
| chr10 | 122646287 | A | A   | A   | Heterozygous CTC subset of CPP |
| chr10 | 124166158 | T | T   | T   | Heterozygous CTC subset of CPP |
| chr10 | 124189197 | A | A,G | A,G | Heterozygous CTC subset of CPP |
| chr10 | 124914529 | C | A,C | C   | Heterozygous CTC subset of CPP |
| chr10 | 126089434 | G | A,G | G   | Heterozygous CTC subset of CPP |
| chr10 | 126480381 | C | C,T | C   | Heterozygous CTC subset of CPP |
| chr10 | 126673560 | G | G   | G   | Heterozygous CTC subset of CPP |
| chr10 | 126727585 | T | T   | T   | Heterozygous CTC subset of CPP |
| chr10 | 127530325 | T | C,T | C,T | Heterozygous CTC subset of CPP |
| chr10 | 127555604 | T | T   | T   | Heterozygous CTC subset of CPP |
| chr10 | 129903802 | A | A,G | A   | Heterozygous CTC subset of CPP |
| chr10 | 129904560 | C | C,T | C   | Heterozygous CTC subset of CPP |
| chr10 | 129904917 | G | A,G | G   | Heterozygous CTC subset of CPP |
| chr10 | 129906990 | G | G   | G   | Heterozygous CTC subset of CPP |

Grillet et al., Supplementary Table 5

|       |           |   |        |        |                                |
|-------|-----------|---|--------|--------|--------------------------------|
| chr10 | 131934747 | G | C,G    | C,G    | Heterozygous CTC subset of CPP |
| chr10 | 131959150 | C | C,T    | C,T    | Heterozygous CTC subset of CPP |
| chr10 | 135180405 | C | C,T    | C      | Heterozygous CTC subset of CPP |
| chr10 | 135211971 | A | A      | A      | Heterozygous CTC subset of CPP |
| chr10 | 135213037 | T | T      | T      | Heterozygous CTC subset of CPP |
| chr10 | 135233590 | T | T      | T      | Heterozygous CTC subset of CPP |
| chr11 | 209311    | A | A      | A      | Heterozygous CTC subset of CPP |
| chr11 | 237087    | A | A,G    | G      | Heterozygous CTC subset of CPP |
| chr11 | 244163    | T | T      | T      | Heterozygous CTC subset of CPP |
| chr11 | 244197    | T | C,T    | C      | Heterozygous CTC subset of CPP |
| chr11 | 490035    | C | C,T    | C      | Heterozygous CTC subset of CPP |
| chr11 | 494942    | G | C,G    | C,G    | Heterozygous CTC subset of CPP |
| chr11 | 534242    | A | A,G    | A,G    | Heterozygous CTC subset of CPP |
| chr11 | 587425    | C | A,C    | C      | Heterozygous CTC subset of CPP |
| chr11 | 601701    | G | G      | G      | Heterozygous CTC subset of CPP |
| chr11 | 607640    | G | G      | G      | Heterozygous CTC subset of CPP |
| chr11 | 609353    | G | A,G    | G      | Heterozygous CTC subset of CPP |
| chr11 | 609616    | T | T      | T      | Heterozygous CTC subset of CPP |
| chr11 | 610277    | T | C,T    | C      | Heterozygous CTC subset of CPP |
| chr11 | 654043    | G | A,G    | G      | Heterozygous CTC subset of CPP |
| chr11 | 709401    | A | A,G    | A      | Heterozygous CTC subset of CPP |
| chr11 | 767302    | C | C      | C      | Heterozygous CTC subset of CPP |
| chr11 | 771034    | A | A,G    | A,G    | Heterozygous CTC subset of CPP |
| chr11 | 772490    | G | A,G    | A,G    | Heterozygous CTC subset of CPP |
| chr11 | 792054    | T | T      | T      | Heterozygous CTC subset of CPP |
| chr11 | 793588    | G | A,G    | G      | Heterozygous CTC subset of CPP |
| chr11 | 793618    | T | T      | T      | Heterozygous CTC subset of CPP |
| chr11 | 804212    | C | A,C    | A      | Heterozygous CTC subset of CPP |
| chr11 | 804363    | T | T      | T      | Heterozygous CTC subset of CPP |
| chr11 | 810358    | G | +T,G   | +T,G   | Heterozygous CTC subset of CPP |
| chr11 | 810361    | G | G,T    | G,T    | Heterozygous CTC subset of CPP |
| chr11 | 812533    | A | +G,A   | +G,A   | Heterozygous CTC subset of CPP |
| chr11 | 824805    | C | C      | C      | Heterozygous CTC subset of CPP |
| chr11 | 870446    | G | A,G    | G      | Heterozygous CTC subset of CPP |
| chr11 | 870467    | C | C,T    | C      | Heterozygous CTC subset of CPP |
| chr11 | 972065    | T | T      | T      | Heterozygous CTC subset of CPP |
| chr11 | 985547    | C | C,T    | T      | Heterozygous CTC subset of CPP |
| chr11 | 993906    | T | T      | T      | Heterozygous CTC subset of CPP |
| chr11 | 993907    | C | C,G    | C      | Heterozygous CTC subset of CPP |
| chr11 | 1009786   | T | T      | T      | Heterozygous CTC subset of CPP |
| chr11 | 1309956   | C | C,T    | C,T    | Heterozygous CTC subset of CPP |
| chr11 | 1974010   | A | +T,A   | +T,A   | Heterozygous CTC subset of CPP |
| chr11 | 1974011   | G | +G,G,T | +G,G,T | Heterozygous CTC subset of CPP |
| chr11 | 2424137   | C | C,T    | C      | Heterozygous CTC subset of CPP |
| chr11 | 2950558   | A | A,G    | A      | Heterozygous CTC subset of CPP |
| chr11 | 3028140   | G | A,G    | A      | Heterozygous CTC subset of CPP |

Grillet et al., Supplementary Table 5

|       |          |   |     |     |                                |
|-------|----------|---|-----|-----|--------------------------------|
| chr11 | 3392845  | T | T   | T   | Heterozygous CTC subset of CPP |
| chr11 | 3714489  | C | C,T | C,T | Heterozygous CTC subset of CPP |
| chr11 | 3720388  | G | G   | G   | Heterozygous CTC subset of CPP |
| chr11 | 3722054  | T | T   | T   | Heterozygous CTC subset of CPP |
| chr11 | 3723781  | G | C,G | G   | Heterozygous CTC subset of CPP |
| chr11 | 3724088  | T | T   | T   | Heterozygous CTC subset of CPP |
| chr11 | 3803357  | G | G,T | G   | Heterozygous CTC subset of CPP |
| chr11 | 3846358  | G | G   | G   | Heterozygous CTC subset of CPP |
| chr11 | 3988787  | T | T   | T   | Heterozygous CTC subset of CPP |
| chr11 | 4141132  | C | A,C | A,C | Heterozygous CTC subset of CPP |
| chr11 | 4154888  | G | G   | G   | Heterozygous CTC subset of CPP |
| chr11 | 4159457  | A | A,G | A,G | Heterozygous CTC subset of CPP |
| chr11 | 6622221  | T | T   | T   | Heterozygous CTC subset of CPP |
| chr11 | 6625455  | G | G   | G   | Heterozygous CTC subset of CPP |
| chr11 | 6629665  | C | C,T | C   | Heterozygous CTC subset of CPP |
| chr11 | 6630833  | G | A,G | G   | Heterozygous CTC subset of CPP |
| chr11 | 6636106  | T | A,T | T   | Heterozygous CTC subset of CPP |
| chr11 | 6636205  | A | A   | A   | Heterozygous CTC subset of CPP |
| chr11 | 8017579  | A | A   | A   | Heterozygous CTC subset of CPP |
| chr11 | 8707233  | C | C,T | C   | Heterozygous CTC subset of CPP |
| chr11 | 9191428  | A | A   | A   | Heterozygous CTC subset of CPP |
| chr11 | 9445398  | T | T   | T   | Heterozygous CTC subset of CPP |
| chr11 | 9446752  | T | T   | T   | Heterozygous CTC subset of CPP |
| chr11 | 9459518  | T | T   | T   | Heterozygous CTC subset of CPP |
| chr11 | 9459519  | G | G   | G   | Heterozygous CTC subset of CPP |
| chr11 | 9595768  | C | C,T | C   | Heterozygous CTC subset of CPP |
| chr11 | 9598070  | T | T   | T   | Heterozygous CTC subset of CPP |
| chr11 | 9598192  | G | G   | G   | Heterozygous CTC subset of CPP |
| chr11 | 10536514 | A | A   | A   | Heterozygous CTC subset of CPP |
| chr11 | 10786142 | C | C,T | T   | Heterozygous CTC subset of CPP |
| chr11 | 10786175 | C | C,T | C   | Heterozygous CTC subset of CPP |
| chr11 | 10789383 | A | A   | A   | Heterozygous CTC subset of CPP |
| chr11 | 10794138 | G | A,G | G   | Heterozygous CTC subset of CPP |
| chr11 | 10800532 | G | G   | G   | Heterozygous CTC subset of CPP |
| chr11 | 10828801 | C | -C  | -C  | Heterozygous CTC subset of CPP |
| chr11 | 10874950 | A | A   | A   | Heterozygous CTC subset of CPP |
| chr11 | 11913585 | G | G,T | T   | Heterozygous CTC subset of CPP |
| chr11 | 11944303 | T | T   | T   | Heterozygous CTC subset of CPP |
| chr11 | 11964046 | A | A   | A   | Heterozygous CTC subset of CPP |
| chr11 | 11964511 | G | G   | G   | Heterozygous CTC subset of CPP |
| chr11 | 11976490 | A | A   | A   | Heterozygous CTC subset of CPP |
| chr11 | 11976583 | T | T   | T   | Heterozygous CTC subset of CPP |
| chr11 | 11976628 | G | A,G | A   | Heterozygous CTC subset of CPP |
| chr11 | 12525925 | C | C,T | C,T | Heterozygous CTC subset of CPP |
| chr11 | 12539170 | T | T   | T   | Heterozygous CTC subset of CPP |
| chr11 | 13716324 | C | C   | C   | Heterozygous CTC subset of CPP |

Grillet et al., Supplementary Table 5

|       |          |   |      |      |                                |
|-------|----------|---|------|------|--------------------------------|
| chr11 | 13736133 | A | A    | A    | Heterozygous CTC subset of CPP |
| chr11 | 16766228 | A | A    | A    | Heterozygous CTC subset of CPP |
| chr11 | 17096654 | T | T    | T    | Heterozygous CTC subset of CPP |
| chr11 | 17096658 | A | A    | A    | Heterozygous CTC subset of CPP |
| chr11 | 17097117 | T | C,T  | C,T  | Heterozygous CTC subset of CPP |
| chr11 | 17099026 | T | -T,T | -T,T | Heterozygous CTC subset of CPP |
| chr11 | 17099027 | G | C,G  | C,G  | Heterozygous CTC subset of CPP |
| chr11 | 17118664 | A | A    | A    | Heterozygous CTC subset of CPP |
| chr11 | 17118687 | T | T    | T    | Heterozygous CTC subset of CPP |
| chr11 | 17132024 | G | C,G  | G    | Heterozygous CTC subset of CPP |
| chr11 | 17144348 | A | A    | A    | Heterozygous CTC subset of CPP |
| chr11 | 17172131 | T | T    | T    | Heterozygous CTC subset of CPP |
| chr11 | 17172201 | A | A    | A    | Heterozygous CTC subset of CPP |
| chr11 | 17190721 | G | G    | G    | Heterozygous CTC subset of CPP |
| chr11 | 17190791 | A | A    | A    | Heterozygous CTC subset of CPP |
| chr11 | 17333663 | G | A    | A    | Heterozygous CTC subset of CPP |
| chr11 | 17333664 | T | T    | T    | Heterozygous CTC subset of CPP |
| chr11 | 17518359 | T | T    | T    | Heterozygous CTC subset of CPP |
| chr11 | 18105213 | G | G    | G    | Heterozygous CTC subset of CPP |
| chr11 | 18108492 | T | C,T  | T    | Heterozygous CTC subset of CPP |
| chr11 | 18354669 | T | T    | T    | Heterozygous CTC subset of CPP |
| chr11 | 18416117 | A | A    | A    | Heterozygous CTC subset of CPP |
| chr11 | 18424451 | C | C,T  | C,T  | Heterozygous CTC subset of CPP |
| chr11 | 18424487 | A | A    | A    | Heterozygous CTC subset of CPP |
| chr11 | 18429376 | A | A    | A    | Heterozygous CTC subset of CPP |
| chr11 | 18429377 | A | A    | A    | Heterozygous CTC subset of CPP |
| chr11 | 18633897 | T | C,T  | T    | Heterozygous CTC subset of CPP |
| chr11 | 18633971 | G | A,G  | A,G  | Heterozygous CTC subset of CPP |
| chr11 | 18637396 | T | T    | T    | Heterozygous CTC subset of CPP |
| chr11 | 20388829 | T | -T,T | -T,T | Heterozygous CTC subset of CPP |
| chr11 | 20404613 | T | G,T  | G    | Heterozygous CTC subset of CPP |
| chr11 | 20424468 | A | A    | A    | Heterozygous CTC subset of CPP |
| chr11 | 27360426 | A | A    | A    | Heterozygous CTC subset of CPP |
| chr11 | 27360452 | A | A    | A    | Heterozygous CTC subset of CPP |
| chr11 | 27362257 | T | C,T  | T    | Heterozygous CTC subset of CPP |
| chr11 | 27362359 | T | G,T  | G,T  | Heterozygous CTC subset of CPP |
| chr11 | 27384585 | G | A,G  | G    | Heterozygous CTC subset of CPP |
| chr11 | 32118767 | T | T    | T    | Heterozygous CTC subset of CPP |
| chr11 | 32119906 | A | A    | A    | Heterozygous CTC subset of CPP |
| chr11 | 32124978 | T | C,T  | T    | Heterozygous CTC subset of CPP |
| chr11 | 32954781 | T | T    | T    | Heterozygous CTC subset of CPP |
| chr11 | 32956492 | C | C,T  | C    | Heterozygous CTC subset of CPP |
| chr11 | 33106607 | A | A    | A    | Heterozygous CTC subset of CPP |
| chr11 | 34165075 | G | G    | G    | Heterozygous CTC subset of CPP |
| chr11 | 34460541 | T | C,T  | C    | Heterozygous CTC subset of CPP |
| chr11 | 34485669 | T | T    | T    | Heterozygous CTC subset of CPP |

Grillet et al., Supplementary Table 5

|       |          |   |     |     |                                |
|-------|----------|---|-----|-----|--------------------------------|
| chr11 | 34909926 | T | G,T | G   | Heterozygous CTC subset of CPP |
| chr11 | 34937813 | G | A,G | A   | Heterozygous CTC subset of CPP |
| chr11 | 34937884 | G | A,G | A   | Heterozygous CTC subset of CPP |
| chr11 | 34938265 | C | C,T | T   | Heterozygous CTC subset of CPP |
| chr11 | 34969112 | A | A   | A   | Heterozygous CTC subset of CPP |
| chr11 | 34991727 | T | C,T | C   | Heterozygous CTC subset of CPP |
| chr11 | 35227768 | T | T   | T   | Heterozygous CTC subset of CPP |
| chr11 | 43343019 | T | T   | T   | Heterozygous CTC subset of CPP |
| chr11 | 43345179 | T | T   | T   | Heterozygous CTC subset of CPP |
| chr11 | 43350406 | A | A   | A   | Heterozygous CTC subset of CPP |
| chr11 | 43423078 | A | A   | A   | Heterozygous CTC subset of CPP |
| chr11 | 43436217 | G | G   | G   | Heterozygous CTC subset of CPP |
| chr11 | 43819950 | T | T   | T   | Heterozygous CTC subset of CPP |
| chr11 | 43819958 | T | T   | T   | Heterozygous CTC subset of CPP |
| chr11 | 43940644 | G | G,T | G,T | Heterozygous CTC subset of CPP |
| chr11 | 45827827 | T | T   | T   | Heterozygous CTC subset of CPP |
| chr11 | 46401117 | A | A   | A   | Heterozygous CTC subset of CPP |
| chr11 | 46401450 | C | C   | C   | Heterozygous CTC subset of CPP |
| chr11 | 46690413 | G | A,G | G   | Heterozygous CTC subset of CPP |
| chr11 | 46699536 | T | T   | T   | Heterozygous CTC subset of CPP |
| chr11 | 46783575 | T | T   | T   | Heterozygous CTC subset of CPP |
| chr11 | 46784177 | C | C   | C   | Heterozygous CTC subset of CPP |
| chr11 | 46804885 | T | T   | T   | Heterozygous CTC subset of CPP |
| chr11 | 46819398 | A | A   | A   | Heterozygous CTC subset of CPP |
| chr11 | 46829682 | A | A   | A   | Heterozygous CTC subset of CPP |
| chr11 | 47178700 | C | C   | C   | Heterozygous CTC subset of CPP |
| chr11 | 47188411 | C | C,T | C,T | Heterozygous CTC subset of CPP |
| chr11 | 47267079 | C | C,T | C   | Heterozygous CTC subset of CPP |
| chr11 | 47317606 | T | T   | T   | Heterozygous CTC subset of CPP |
| chr11 | 47441928 | C | C,T | C   | Heterozygous CTC subset of CPP |
| chr11 | 47500493 | C | C   | C   | Heterozygous CTC subset of CPP |
| chr11 | 47752965 | T | T   | T   | Heterozygous CTC subset of CPP |
| chr11 | 47819624 | T | T   | T   | Heterozygous CTC subset of CPP |
| chr11 | 47834874 | A | A   | A   | Heterozygous CTC subset of CPP |
| chr11 | 57070022 | A | A   | A   | Heterozygous CTC subset of CPP |
| chr11 | 57070111 | T | T   | T   | Heterozygous CTC subset of CPP |
| chr11 | 57077464 | T | C,T | T   | Heterozygous CTC subset of CPP |
| chr11 | 57080356 | A | A   | A   | Heterozygous CTC subset of CPP |
| chr11 | 57268640 | A | A   | A   | Heterozygous CTC subset of CPP |
| chr11 | 57296215 | A | A   | A   | Heterozygous CTC subset of CPP |
| chr11 | 57463500 | T | C,T | C,T | Heterozygous CTC subset of CPP |
| chr11 | 57505134 | A | A   | A   | Heterozygous CTC subset of CPP |
| chr11 | 57505408 | A | A   | A   | Heterozygous CTC subset of CPP |
| chr11 | 57563991 | C | C,T | C,T | Heterozygous CTC subset of CPP |
| chr11 | 58377467 | C | C,T | C   | Heterozygous CTC subset of CPP |
| chr11 | 58378424 | A | A,G | A   | Heterozygous CTC subset of CPP |



Grillet et al., Supplementary Table 5

|       |          |   |      |     |                                |
|-------|----------|---|------|-----|--------------------------------|
| chr11 | 58386177 | G | A,G  | G   | Heterozygous CTC subset of CPP |
| chr11 | 58892376 | C | C    | C   | Heterozygous CTC subset of CPP |
| chr11 | 58893256 | G | G    | G   | Heterozygous CTC subset of CPP |
| chr11 | 58893259 | A | A    | A   | Heterozygous CTC subset of CPP |
| chr11 | 58920344 | A | A    | A   | Heterozygous CTC subset of CPP |
| chr11 | 59382989 | A | A    | A   | Heterozygous CTC subset of CPP |
| chr11 | 59560986 | A | A    | A   | Heterozygous CTC subset of CPP |
| chr11 | 60610065 | G | A,G  | G   | Heterozygous CTC subset of CPP |
| chr11 | 60658246 | A | A    | A   | Heterozygous CTC subset of CPP |
| chr11 | 60689445 | T | C,T  | C   | Heterozygous CTC subset of CPP |
| chr11 | 60694766 | T | T    | T   | Heterozygous CTC subset of CPP |
| chr11 | 60703777 | G | A,G  | G   | Heterozygous CTC subset of CPP |
| chr11 | 60898289 | A | A    | A   | Heterozygous CTC subset of CPP |
| chr11 | 60899767 | A | A,G  | A,G | Heterozygous CTC subset of CPP |
| chr11 | 61133665 | A | A    | A   | Heterozygous CTC subset of CPP |
| chr11 | 61165256 | A | A    | A   | Heterozygous CTC subset of CPP |
| chr11 | 61165280 | G | A,G  | A   | Heterozygous CTC subset of CPP |
| chr11 | 61179285 | G | A,G  | A   | Heterozygous CTC subset of CPP |
| chr11 | 61734789 | A | A    | A   | Heterozygous CTC subset of CPP |
| chr11 | 61895741 | A | A,G  | G   | Heterozygous CTC subset of CPP |
| chr11 | 61897359 | C | C,T  | T   | Heterozygous CTC subset of CPP |
| chr11 | 61908440 | T | C,T  | T   | Heterozygous CTC subset of CPP |
| chr11 | 61913196 | G | G,T  | T   | Heterozygous CTC subset of CPP |
| chr11 | 62284743 | T | T    | T   | Heterozygous CTC subset of CPP |
| chr11 | 62285498 | C | C    | C   | Heterozygous CTC subset of CPP |
| chr11 | 62334410 | T | T    | T   | Heterozygous CTC subset of CPP |
| chr11 | 62334908 | G | C,G  | G   | Heterozygous CTC subset of CPP |
| chr11 | 62339356 | A | A    | A   | Heterozygous CTC subset of CPP |
| chr11 | 62339365 | T | C,T  | T   | Heterozygous CTC subset of CPP |
| chr11 | 62366109 | C | C    | C   | Heterozygous CTC subset of CPP |
| chr11 | 62378762 | T | T    | T   | Heterozygous CTC subset of CPP |
| chr11 | 62397114 | T | C,T  | T   | Heterozygous CTC subset of CPP |
| chr11 | 62414753 | T | T    | T   | Heterozygous CTC subset of CPP |
| chr11 | 62417126 | A | A    | A   | Heterozygous CTC subset of CPP |
| chr11 | 62439569 | G | A,G  | A,G | Heterozygous CTC subset of CPP |
| chr11 | 62458275 | T | C,T  | T   | Heterozygous CTC subset of CPP |
| chr11 | 62496519 | T | C,T  | T   | Heterozygous CTC subset of CPP |
| chr11 | 62505764 | C | C,T  | C   | Heterozygous CTC subset of CPP |
| chr11 | 62505843 | A | A    | A   | Heterozygous CTC subset of CPP |
| chr11 | 62549748 | T | T    | T   | Heterozygous CTC subset of CPP |
| chr11 | 62554321 | G | G    | G   | Heterozygous CTC subset of CPP |
| chr11 | 62564009 | T | C,T  | C,T | Heterozygous CTC subset of CPP |
| chr11 | 62570914 | A | A    | A   | Heterozygous CTC subset of CPP |
| chr11 | 62639135 | G | G    | G   | Heterozygous CTC subset of CPP |
| chr11 | 62652779 | C | C    | C   | Heterozygous CTC subset of CPP |
| chr11 | 63525655 | C | +A,C | C   | Heterozygous CTC subset of CPP |

Grillet et al., Supplementary Table 5

|       |          |   |      |      |                                |
|-------|----------|---|------|------|--------------------------------|
| chr11 | 63525788 | T | T    | T    | Heterozygous CTC subset of CPP |
| chr11 | 63581285 | G | G    | G    | Heterozygous CTC subset of CPP |
| chr11 | 63585804 | C | A,C  | C    | Heterozygous CTC subset of CPP |
| chr11 | 63667350 | A | A    | A    | Heterozygous CTC subset of CPP |
| chr11 | 63667483 | C | C    | C    | Heterozygous CTC subset of CPP |
| chr11 | 63767186 | A | A    | A    | Heterozygous CTC subset of CPP |
| chr11 | 63970625 | G | A,G  | G    | Heterozygous CTC subset of CPP |
| chr11 | 63991649 | A | A    | A    | Heterozygous CTC subset of CPP |
| chr11 | 63991805 | A | A    | A    | Heterozygous CTC subset of CPP |
| chr11 | 63993287 | C | C,T  | C    | Heterozygous CTC subset of CPP |
| chr11 | 64004692 | C | C,T  | T    | Heterozygous CTC subset of CPP |
| chr11 | 64013952 | A | A    | A    | Heterozygous CTC subset of CPP |
| chr11 | 64023087 | G | G    | G    | Heterozygous CTC subset of CPP |
| chr11 | 64023971 | G | A,G  | A    | Heterozygous CTC subset of CPP |
| chr11 | 64026144 | G | A    | A    | Heterozygous CTC subset of CPP |
| chr11 | 64026372 | A | A    | A    | Heterozygous CTC subset of CPP |
| chr11 | 64026639 | G | A,G  | G    | Heterozygous CTC subset of CPP |
| chr11 | 64030158 | A | A    | A    | Heterozygous CTC subset of CPP |
| chr11 | 64033673 | A | A    | A    | Heterozygous CTC subset of CPP |
| chr11 | 64034965 | C | C,T  | C    | Heterozygous CTC subset of CPP |
| chr11 | 64039175 | G | A,G  | G    | Heterozygous CTC subset of CPP |
| chr11 | 64083436 | T | T    | T    | Heterozygous CTC subset of CPP |
| chr11 | 64084750 | C | C,T  | C    | Heterozygous CTC subset of CPP |
| chr11 | 64136014 | T | T    | T    | Heterozygous CTC subset of CPP |
| chr11 | 64137716 | A | A    | A    | Heterozygous CTC subset of CPP |
| chr11 | 64138805 | T | C,T  | T    | Heterozygous CTC subset of CPP |
| chr11 | 64534518 | G | G    | G    | Heterozygous CTC subset of CPP |
| chr11 | 64534519 | G | G    | G    | Heterozygous CTC subset of CPP |
| chr11 | 64572602 | G | A,G  | G    | Heterozygous CTC subset of CPP |
| chr11 | 64574666 | A | A    | A    | Heterozygous CTC subset of CPP |
| chr11 | 64789194 | T | C,T  | C,T  | Heterozygous CTC subset of CPP |
| chr11 | 64799998 | T | C,T  | C,T  | Heterozygous CTC subset of CPP |
| chr11 | 64809044 | C | C,T  | C,T  | Heterozygous CTC subset of CPP |
| chr11 | 64855507 | G | A,G  | G    | Heterozygous CTC subset of CPP |
| chr11 | 64876384 | C | C    | C    | Heterozygous CTC subset of CPP |
| chr11 | 64880979 | C | C    | C    | Heterozygous CTC subset of CPP |
| chr11 | 64882301 | C | C    | C    | Heterozygous CTC subset of CPP |
| chr11 | 64882865 | T | T    | T    | Heterozygous CTC subset of CPP |
| chr11 | 64884249 | T | T    | T    | Heterozygous CTC subset of CPP |
| chr11 | 64898226 | C | C,T  | C,T  | Heterozygous CTC subset of CPP |
| chr11 | 64950970 | C | C,T  | C,T  | Heterozygous CTC subset of CPP |
| chr11 | 64972286 | G | C,G  | G    | Heterozygous CTC subset of CPP |
| chr11 | 64974282 | C | C,T  | C    | Heterozygous CTC subset of CPP |
| chr11 | 65268479 | G | +T,G | +T,G | Heterozygous CTC subset of CPP |
| chr11 | 65268480 | T | -T,T | T    | Heterozygous CTC subset of CPP |
| chr11 | 65268581 | T | T    | T    | Heterozygous CTC subset of CPP |

Grillet et al., Supplementary Table 5

|       |          |   |       |      |                                |
|-------|----------|---|-------|------|--------------------------------|
| chr11 | 65269897 | G | G     | G    | Heterozygous CTC subset of CPP |
| chr11 | 65269959 | T | T     | T    | Heterozygous CTC subset of CPP |
| chr11 | 65270043 | T | T     | T    | Heterozygous CTC subset of CPP |
| chr11 | 65270062 | T | T     | T    | Heterozygous CTC subset of CPP |
| chr11 | 65270090 | C | +T,C  | C    | Heterozygous CTC subset of CPP |
| chr11 | 65270091 | T | T     | T    | Heterozygous CTC subset of CPP |
| chr11 | 65270109 | C | +T,C  | +T,C | Heterozygous CTC subset of CPP |
| chr11 | 65271746 | A | A,G   | A    | Heterozygous CTC subset of CPP |
| chr11 | 65271747 | T | C,G,T | C,T  | Heterozygous CTC subset of CPP |
| chr11 | 65271779 | C | +T,C  | +T,C | Heterozygous CTC subset of CPP |
| chr11 | 65271780 | T | T     | T    | Heterozygous CTC subset of CPP |
| chr11 | 65271832 | C | C,T   | C    | Heterozygous CTC subset of CPP |
| chr11 | 65272638 | C | C     | C    | Heterozygous CTC subset of CPP |
| chr11 | 65273491 | T | C,T   | C,T  | Heterozygous CTC subset of CPP |
| chr11 | 65350546 | T | T     | T    | Heterozygous CTC subset of CPP |
| chr11 | 65373551 | C | C     | C    | Heterozygous CTC subset of CPP |
| chr11 | 65384727 | C | C,T   | C,T  | Heterozygous CTC subset of CPP |
| chr11 | 65391795 | T | T     | T    | Heterozygous CTC subset of CPP |
| chr11 | 65391804 | T | T     | T    | Heterozygous CTC subset of CPP |
| chr11 | 65391837 | G | G     | G    | Heterozygous CTC subset of CPP |
| chr11 | 65392429 | T | T     | T    | Heterozygous CTC subset of CPP |
| chr11 | 65392695 | C | C,T   | C    | Heterozygous CTC subset of CPP |
| chr11 | 65392981 | G | G     | G    | Heterozygous CTC subset of CPP |
| chr11 | 65421779 | T | T     | T    | Heterozygous CTC subset of CPP |
| chr11 | 65623519 | G | A,G   | A    | Heterozygous CTC subset of CPP |
| chr11 | 65631167 | C | C,T   | T    | Heterozygous CTC subset of CPP |
| chr11 | 65631973 | G | A,G   | A    | Heterozygous CTC subset of CPP |
| chr11 | 65632202 | C | C     | C    | Heterozygous CTC subset of CPP |
| chr11 | 65632262 | G | G,T   | T    | Heterozygous CTC subset of CPP |
| chr11 | 65660102 | C | C     | C    | Heterozygous CTC subset of CPP |
| chr11 | 65684997 | A | A     | A    | Heterozygous CTC subset of CPP |
| chr11 | 65729513 | C | C,G   | C    | Heterozygous CTC subset of CPP |
| chr11 | 65732651 | G | A,G   | A,G  | Heterozygous CTC subset of CPP |
| chr11 | 65733393 | C | C,T   | C,T  | Heterozygous CTC subset of CPP |
| chr11 | 65735174 | G | C,G   | C,G  | Heterozygous CTC subset of CPP |
| chr11 | 65746348 | T | T     | T    | Heterozygous CTC subset of CPP |
| chr11 | 65746349 | A | A     | A    | Heterozygous CTC subset of CPP |
| chr11 | 65822786 | G | G     | G    | Heterozygous CTC subset of CPP |
| chr11 | 65826704 | G | A,G   | A,G  | Heterozygous CTC subset of CPP |
| chr11 | 65831013 | G | G     | G    | Heterozygous CTC subset of CPP |
| chr11 | 65836223 | T | T     | T    | Heterozygous CTC subset of CPP |
| chr11 | 66029409 | A | A     | A    | Heterozygous CTC subset of CPP |
| chr11 | 66030492 | T | T     | T    | Heterozygous CTC subset of CPP |
| chr11 | 66031660 | C | C,T   | C    | Heterozygous CTC subset of CPP |
| chr11 | 66032542 | A | A     | A    | Heterozygous CTC subset of CPP |
| chr11 | 66033229 | A | A     | A    | Heterozygous CTC subset of CPP |

Grillet et al., Supplementary Table 5

|       |          |   |      |     |                                |
|-------|----------|---|------|-----|--------------------------------|
| chr11 | 66039933 | T | -T,T | -T  | Heterozygous CTC subset of CPP |
| chr11 | 66105194 | G | A,G  | G   | Heterozygous CTC subset of CPP |
| chr11 | 66109033 | T | C,T  | C   | Heterozygous CTC subset of CPP |
| chr11 | 66113543 | G | G    | G   | Heterozygous CTC subset of CPP |
| chr11 | 66206169 | C | C,T  | T   | Heterozygous CTC subset of CPP |
| chr11 | 66247935 | A | A    | A   | Heterozygous CTC subset of CPP |
| chr11 | 66272142 | A | A,G  | G   | Heterozygous CTC subset of CPP |
| chr11 | 66372823 | T | T    | T   | Heterozygous CTC subset of CPP |
| chr11 | 66373305 | G | G    | G   | Heterozygous CTC subset of CPP |
| chr11 | 66392209 | C | C    | C   | Heterozygous CTC subset of CPP |
| chr11 | 66392880 | C | C,T  | C   | Heterozygous CTC subset of CPP |
| chr11 | 66394080 | T | T    | T   | Heterozygous CTC subset of CPP |
| chr11 | 66612999 | C | C,T  | C   | Heterozygous CTC subset of CPP |
| chr11 | 66626234 | T | C,T  | C,T | Heterozygous CTC subset of CPP |
| chr11 | 66626482 | T | T    | T   | Heterozygous CTC subset of CPP |
| chr11 | 66995554 | A | A    | A   | Heterozygous CTC subset of CPP |
| chr11 | 67120174 | C | C    | C   | Heterozygous CTC subset of CPP |
| chr11 | 67200819 | C | C,T  | C,T | Heterozygous CTC subset of CPP |
| chr11 | 67202156 | C | C,T  | C,T | Heterozygous CTC subset of CPP |
| chr11 | 67232104 | A | A    | A   | Heterozygous CTC subset of CPP |
| chr11 | 67232299 | C | C    | C   | Heterozygous CTC subset of CPP |
| chr11 | 67258325 | A | A    | A   | Heterozygous CTC subset of CPP |
| chr11 | 67258432 | A | A    | A   | Heterozygous CTC subset of CPP |
| chr11 | 67266247 | C | C    | C   | Heterozygous CTC subset of CPP |
| chr11 | 67266289 | G | G    | G   | Heterozygous CTC subset of CPP |
| chr11 | 67352689 | A | A,G  | A,G | Heterozygous CTC subset of CPP |
| chr11 | 67353970 | T | C,T  | C,T | Heterozygous CTC subset of CPP |
| chr11 | 67376944 | C | C,T  | C   | Heterozygous CTC subset of CPP |
| chr11 | 67803847 | A | A    | A   | Heterozygous CTC subset of CPP |
| chr11 | 68029126 | T | T    | T   | Heterozygous CTC subset of CPP |
| chr11 | 68030173 | C | A,C  | C   | Heterozygous CTC subset of CPP |
| chr11 | 68153923 | C | C    | C   | Heterozygous CTC subset of CPP |
| chr11 | 68174122 | G | G    | G   | Heterozygous CTC subset of CPP |
| chr11 | 68177510 | C | C    | C   | Heterozygous CTC subset of CPP |
| chr11 | 68192690 | G | A,G  | A,G | Heterozygous CTC subset of CPP |
| chr11 | 68201295 | C | C,T  | C   | Heterozygous CTC subset of CPP |
| chr11 | 68305259 | A | A    | A   | Heterozygous CTC subset of CPP |
| chr11 | 68382591 | C | C,T  | C   | Heterozygous CTC subset of CPP |
| chr11 | 70049523 | A | A,G  | A,G | Heterozygous CTC subset of CPP |
| chr11 | 70183499 | C | C    | C   | Heterozygous CTC subset of CPP |
| chr11 | 70189797 | A | A    | A   | Heterozygous CTC subset of CPP |
| chr11 | 70201917 | G | G    | G   | Heterozygous CTC subset of CPP |
| chr11 | 70202334 | T | T    | T   | Heterozygous CTC subset of CPP |
| chr11 | 70218496 | G | G    | G   | Heterozygous CTC subset of CPP |
| chr11 | 70253475 | C | C,T  | C,T | Heterozygous CTC subset of CPP |
| chr11 | 71715860 | A | A    | A   | Heterozygous CTC subset of CPP |

Grillet et al., Supplementary Table 5

|       |          |   |     |     |                                |
|-------|----------|---|-----|-----|--------------------------------|
| chr11 | 71715862 | G | G   | G   | Heterozygous CTC subset of CPP |
| chr11 | 71734189 | A | A   | A   | Heterozygous CTC subset of CPP |
| chr11 | 71939290 | C | C   | C   | Heterozygous CTC subset of CPP |
| chr11 | 71942626 | T | T   | T   | Heterozygous CTC subset of CPP |
| chr11 | 72396720 | G | A,G | G   | Heterozygous CTC subset of CPP |
| chr11 | 72408055 | G | C,G | G   | Heterozygous CTC subset of CPP |
| chr11 | 72410533 | T | T   | T   | Heterozygous CTC subset of CPP |
| chr11 | 73427322 | T | T   | T   | Heterozygous CTC subset of CPP |
| chr11 | 73610251 | A | A   | A   | Heterozygous CTC subset of CPP |
| chr11 | 73689303 | A | A   | A   | Heterozygous CTC subset of CPP |
| chr11 | 74305134 | T | T   | T   | Heterozygous CTC subset of CPP |
| chr11 | 74336574 | C | C   | C   | Heterozygous CTC subset of CPP |
| chr11 | 74985203 | A | A   | A   | Heterozygous CTC subset of CPP |
| chr11 | 74989715 | T | T   | T   | Heterozygous CTC subset of CPP |
| chr11 | 75277992 | C | C,T | C   | Heterozygous CTC subset of CPP |
| chr11 | 76507144 | G | G   | G   | Heterozygous CTC subset of CPP |
| chr11 | 77409654 | A | A   | A   | Heterozygous CTC subset of CPP |
| chr11 | 77411824 | G | G   | G   | Heterozygous CTC subset of CPP |
| chr11 | 77475692 | T | T   | T   | Heterozygous CTC subset of CPP |
| chr11 | 77790655 | G | C,G | G   | Heterozygous CTC subset of CPP |
| chr11 | 77815497 | A | A   | A   | Heterozygous CTC subset of CPP |
| chr11 | 77825320 | T | C,T | C,T | Heterozygous CTC subset of CPP |
| chr11 | 78176966 | T | T   | T   | Heterozygous CTC subset of CPP |
| chr11 | 78282429 | A | A   | A   | Heterozygous CTC subset of CPP |
| chr11 | 82549469 | C | C   | C   | Heterozygous CTC subset of CPP |
| chr11 | 82878268 | A | A   | A   | Heterozygous CTC subset of CPP |
| chr11 | 82973004 | C | C,T | C   | Heterozygous CTC subset of CPP |
| chr11 | 82996986 | A | A,C | A,C | Heterozygous CTC subset of CPP |
| chr11 | 85375728 | T | T   | T   | Heterozygous CTC subset of CPP |
| chr11 | 85692181 | A | A,C | A   | Heterozygous CTC subset of CPP |
| chr11 | 85725937 | C | C,T | C,T | Heterozygous CTC subset of CPP |
| chr11 | 85726004 | G | G   | G   | Heterozygous CTC subset of CPP |
| chr11 | 85963248 | A | A   | A   | Heterozygous CTC subset of CPP |
| chr11 | 86017382 | A | A   | A   | Heterozygous CTC subset of CPP |
| chr11 | 88045583 | A | G   | G   | Heterozygous CTC subset of CPP |
| chr11 | 88070690 | C | C,T | C   | Heterozygous CTC subset of CPP |
| chr11 | 89935586 | G | G,T | G,T | Heterozygous CTC subset of CPP |
| chr11 | 89938654 | T | T   | T   | Heterozygous CTC subset of CPP |
| chr11 | 93517874 | C | C,G | C   | Heterozygous CTC subset of CPP |
| chr11 | 93517886 | G | C,G | G   | Heterozygous CTC subset of CPP |
| chr11 | 93526969 | A | A   | A   | Heterozygous CTC subset of CPP |
| chr11 | 93528183 | T | T   | T   | Heterozygous CTC subset of CPP |
| chr11 | 93529655 | G | G   | G   | Heterozygous CTC subset of CPP |
| chr11 | 93913413 | A | A   | A   | Heterozygous CTC subset of CPP |
| chr11 | 94212018 | T | T   | T   | Heterozygous CTC subset of CPP |
| chr11 | 94278458 | G | G   | G   | Heterozygous CTC subset of CPP |

Grillet et al., Supplementary Table 5

|       |           |   |      |      |                                |
|-------|-----------|---|------|------|--------------------------------|
| chr11 | 94699507  | A | +T,A | +T,A | Heterozygous CTC subset of CPP |
| chr11 | 94699509  | A | A    | A    | Heterozygous CTC subset of CPP |
| chr11 | 94800902  | G | +C,G | +C,G | Heterozygous CTC subset of CPP |
| chr11 | 94800904  | G | G    | G    | Heterozygous CTC subset of CPP |
| chr11 | 94800905  | C | C    | C    | Heterozygous CTC subset of CPP |
| chr11 | 95595220  | A | A    | A    | Heterozygous CTC subset of CPP |
| chr11 | 95657088  | C | C,T  | C    | Heterozygous CTC subset of CPP |
| chr11 | 102234446 | A | A    | A    | Heterozygous CTC subset of CPP |
| chr11 | 102248423 | C | C    | C    | Heterozygous CTC subset of CPP |
| chr11 | 102272884 | C | C,T  | C    | Heterozygous CTC subset of CPP |
| chr11 | 105881268 | T | T    | T    | Heterozygous CTC subset of CPP |
| chr11 | 105881439 | A | A    | A    | Heterozygous CTC subset of CPP |
| chr11 | 107673732 | A | A    | A    | Heterozygous CTC subset of CPP |
| chr11 | 107944224 | G | G    | G    | Heterozygous CTC subset of CPP |
| chr11 | 107965641 | A | A    | A    | Heterozygous CTC subset of CPP |
| chr11 | 107992325 | T | A,T  | A,T  | Heterozygous CTC subset of CPP |
| chr11 | 107992346 | G | C,G  | C,G  | Heterozygous CTC subset of CPP |
| chr11 | 108031736 | A | A    | A    | Heterozygous CTC subset of CPP |
| chr11 | 110306645 | T | T    | T    | Heterozygous CTC subset of CPP |
| chr11 | 111622995 | A | A    | A    | Heterozygous CTC subset of CPP |
| chr11 | 111624263 | A | A    | A    | Heterozygous CTC subset of CPP |
| chr11 | 113608354 | A | A    | A    | Heterozygous CTC subset of CPP |
| chr11 | 116633825 | C | C,T  | T    | Heterozygous CTC subset of CPP |
| chr11 | 116652906 | T | T    | T    | Heterozygous CTC subset of CPP |
| chr11 | 116655600 | G | A,G  | G    | Heterozygous CTC subset of CPP |
| chr11 | 118130815 | T | T    | T    | Heterozygous CTC subset of CPP |
| chr11 | 118239511 | T | T    | T    | Heterozygous CTC subset of CPP |
| chr11 | 118243238 | A | A    | A    | Heterozygous CTC subset of CPP |
| chr11 | 118250402 | T | T    | T    | Heterozygous CTC subset of CPP |
| chr11 | 118277802 | T | T    | T    | Heterozygous CTC subset of CPP |
| chr11 | 118471423 | T | C,T  | T    | Heterozygous CTC subset of CPP |
| chr11 | 118471996 | C | C,T  | C    | Heterozygous CTC subset of CPP |
| chr11 | 118472109 | T | T    | T    | Heterozygous CTC subset of CPP |
| chr11 | 118472354 | C | A,C  | C    | Heterozygous CTC subset of CPP |
| chr11 | 118639004 | A | A    | A    | Heterozygous CTC subset of CPP |
| chr11 | 118650379 | T | T    | T    | Heterozygous CTC subset of CPP |
| chr11 | 118769308 | C | C    | C    | Heterozygous CTC subset of CPP |
| chr11 | 118769777 | T | T    | T    | Heterozygous CTC subset of CPP |
| chr11 | 118772174 | C | C    | C    | Heterozygous CTC subset of CPP |
| chr11 | 118772197 | G | G    | G    | Heterozygous CTC subset of CPP |
| chr11 | 118888142 | A | A    | A    | Heterozygous CTC subset of CPP |
| chr11 | 118888666 | A | A    | A    | Heterozygous CTC subset of CPP |
| chr11 | 118888667 | C | C    | C    | Heterozygous CTC subset of CPP |
| chr11 | 118889680 | G | G    | G    | Heterozygous CTC subset of CPP |
| chr11 | 118898436 | C | -C,C | -C,C | Heterozygous CTC subset of CPP |
| chr11 | 118919206 | T | C,T  | C    | Heterozygous CTC subset of CPP |

Grillet et al., Supplementary Table 5

|       |           |   |      |      |                                |
|-------|-----------|---|------|------|--------------------------------|
| chr11 | 118920548 | A | A    | A    | Heterozygous CTC subset of CPP |
| chr11 | 118922200 | G | A,G  | A,G  | Heterozygous CTC subset of CPP |
| chr11 | 118925341 | G | A,G  | A    | Heterozygous CTC subset of CPP |
| chr11 | 118962230 | G | G,T  | G,T  | Heterozygous CTC subset of CPP |
| chr11 | 118967758 | T | C,T  | T    | Heterozygous CTC subset of CPP |
| chr11 | 118969142 | G | G    | G    | Heterozygous CTC subset of CPP |
| chr11 | 119206375 | G | A,G  | A    | Heterozygous CTC subset of CPP |
| chr11 | 119206460 | C | C    | C    | Heterozygous CTC subset of CPP |
| chr11 | 119206690 | C | C    | C    | Heterozygous CTC subset of CPP |
| chr11 | 120008255 | G | +A,G | G    | Heterozygous CTC subset of CPP |
| chr11 | 120278477 | A | A,G  | A    | Heterozygous CTC subset of CPP |
| chr11 | 120295112 | A | A    | A    | Heterozygous CTC subset of CPP |
| chr11 | 120327958 | A | A    | A    | Heterozygous CTC subset of CPP |
| chr11 | 120337973 | T | T    | T    | Heterozygous CTC subset of CPP |
| chr11 | 120346056 | C | C    | C    | Heterozygous CTC subset of CPP |
| chr11 | 122931302 | T | T    | T    | Heterozygous CTC subset of CPP |
| chr11 | 122931303 | T | T    | T    | Heterozygous CTC subset of CPP |
| chr11 | 125479363 | G | A,G  | A,G  | Heterozygous CTC subset of CPP |
| chr11 | 125525190 | A | A    | A    | Heterozygous CTC subset of CPP |
| chr11 | 126073409 | A | A    | A    | Heterozygous CTC subset of CPP |
| chr11 | 126143282 | T | T    | T    | Heterozygous CTC subset of CPP |
| chr11 | 126276006 | C | C    | C    | Heterozygous CTC subset of CPP |
| chr11 | 129746628 | T | T    | T    | Heterozygous CTC subset of CPP |
| chr11 | 129753091 | T | T    | T    | Heterozygous CTC subset of CPP |
| chr11 | 129939826 | C | C,T  | C    | Heterozygous CTC subset of CPP |
| chr11 | 129980556 | G | -G,G | -G,G | Heterozygous CTC subset of CPP |
| chr11 | 130058834 | G | G    | G    | Heterozygous CTC subset of CPP |
| chr11 | 134109924 | T | T    | T    | Heterozygous CTC subset of CPP |
| chr11 | 134118274 | G | G    | G    | Heterozygous CTC subset of CPP |
| chr11 | 134129542 | T | T    | T    | Heterozygous CTC subset of CPP |
| chr11 | 134217327 | G | G    | G    | Heterozygous CTC subset of CPP |
| chr11 | 134244578 | T | T    | T    | Heterozygous CTC subset of CPP |
| chr12 | 394751    | A | A    | A    | Heterozygous CTC subset of CPP |
| chr12 | 419070    | C | C    | C    | Heterozygous CTC subset of CPP |
| chr12 | 475184    | T | T    | T    | Heterozygous CTC subset of CPP |
| chr12 | 939302    | A | A,G  | G    | Heterozygous CTC subset of CPP |
| chr12 | 968497    | A | A    | A    | Heterozygous CTC subset of CPP |
| chr12 | 968553    | A | A    | A    | Heterozygous CTC subset of CPP |
| chr12 | 968573    | T | T    | T    | Heterozygous CTC subset of CPP |
| chr12 | 970296    | G | G    | G    | Heterozygous CTC subset of CPP |
| chr12 | 971278    | T | T    | T    | Heterozygous CTC subset of CPP |
| chr12 | 971309    | G | G    | G    | Heterozygous CTC subset of CPP |
| chr12 | 987482    | G | A,G  | A    | Heterozygous CTC subset of CPP |
| chr12 | 991124    | T | T    | T    | Heterozygous CTC subset of CPP |
| chr12 | 991204    | G | G    | G    | Heterozygous CTC subset of CPP |
| chr12 | 996470    | G | G    | G    | Heterozygous CTC subset of CPP |

Grillet et al., Supplementary Table 5

|       |          |   |        |        |                                |
|-------|----------|---|--------|--------|--------------------------------|
| chr12 | 2909208  | A | A      | A      | Heterozygous CTC subset of CPP |
| chr12 | 2929328  | T | T      | T      | Heterozygous CTC subset of CPP |
| chr12 | 2968169  | A | A,G    | A,G    | Heterozygous CTC subset of CPP |
| chr12 | 2997397  | G | A,G    | A,G    | Heterozygous CTC subset of CPP |
| chr12 | 3121369  | A | A      | A      | Heterozygous CTC subset of CPP |
| chr12 | 3788145  | C | C,T    | C,T    | Heterozygous CTC subset of CPP |
| chr12 | 4461446  | C | C      | C      | Heterozygous CTC subset of CPP |
| chr12 | 4461485  | G | A,G    | G      | Heterozygous CTC subset of CPP |
| chr12 | 4461487  | A | A      | A      | Heterozygous CTC subset of CPP |
| chr12 | 4665660  | T | T      | T      | Heterozygous CTC subset of CPP |
| chr12 | 6439823  | A | A      | A      | Heterozygous CTC subset of CPP |
| chr12 | 6619284  | C | C,G    | G      | Heterozygous CTC subset of CPP |
| chr12 | 6619882  | T | T      | T      | Heterozygous CTC subset of CPP |
| chr12 | 6631169  | C | A,C    | A      | Heterozygous CTC subset of CPP |
| chr12 | 6635274  | G | A,G    | G      | Heterozygous CTC subset of CPP |
| chr12 | 6637845  | T | C,T    | C      | Heterozygous CTC subset of CPP |
| chr12 | 6637941  | C | C      | C      | Heterozygous CTC subset of CPP |
| chr12 | 6639088  | A | A,G    | G      | Heterozygous CTC subset of CPP |
| chr12 | 6639981  | C | C,G    | C,G    | Heterozygous CTC subset of CPP |
| chr12 | 6640670  | T | T      | T      | Heterozygous CTC subset of CPP |
| chr12 | 6640677  | T | A,T    | A,T    | Heterozygous CTC subset of CPP |
| chr12 | 6643974  | A | +A,A,C | +A,A,C | Heterozygous CTC subset of CPP |
| chr12 | 6646279  | G | G      | G      | Heterozygous CTC subset of CPP |
| chr12 | 6646280  | G | G      | G      | Heterozygous CTC subset of CPP |
| chr12 | 6646320  | T | C,T    | C,T    | Heterozygous CTC subset of CPP |
| chr12 | 6647109  | T | C,T    | C,T    | Heterozygous CTC subset of CPP |
| chr12 | 6711147  | C | A,C    | A,C    | Heterozygous CTC subset of CPP |
| chr12 | 6777213  | T | T      | T      | Heterozygous CTC subset of CPP |
| chr12 | 6787622  | C | C,T    | C,T    | Heterozygous CTC subset of CPP |
| chr12 | 6840209  | G | A,G    | A,G    | Heterozygous CTC subset of CPP |
| chr12 | 6965194  | A | A,G    | A      | Heterozygous CTC subset of CPP |
| chr12 | 6965972  | G | A,G    | G      | Heterozygous CTC subset of CPP |
| chr12 | 6966005  | C | C,T    | C      | Heterozygous CTC subset of CPP |
| chr12 | 6978504  | A | A      | A      | Heterozygous CTC subset of CPP |
| chr12 | 6978505  | A | A      | A      | Heterozygous CTC subset of CPP |
| chr12 | 6979987  | A | A      | A      | Heterozygous CTC subset of CPP |
| chr12 | 7030887  | T | T      | T      | Heterozygous CTC subset of CPP |
| chr12 | 7045900  | G | G      | G      | Heterozygous CTC subset of CPP |
| chr12 | 7045906  | G | A,G    | G      | Heterozygous CTC subset of CPP |
| chr12 | 7075585  | A | C      | C      | Heterozygous CTC subset of CPP |
| chr12 | 7080187  | C | C      | C      | Heterozygous CTC subset of CPP |
| chr12 | 7080210  | A | +G,A   | +G,A   | Heterozygous CTC subset of CPP |
| chr12 | 7080212  | T | +C,C,G | +C,C,G | Heterozygous CTC subset of CPP |
| chr12 | 7086542  | T | T      | T      | Heterozygous CTC subset of CPP |
| chr12 | 7362390  | T | T      | T      | Heterozygous CTC subset of CPP |
| chr12 | 10658600 | C | C,T    | C,T    | Heterozygous CTC subset of CPP |



Grillet et al., Supplementary Table 5

|       |          |   |        |        |                                |
|-------|----------|---|--------|--------|--------------------------------|
| chr12 | 10659551 | T | T      | T      | Heterozygous CTC subset of CPP |
| chr12 | 10763236 | G | C,G    | C,G    | Heterozygous CTC subset of CPP |
| chr12 | 10854564 | T | T      | T      | Heterozygous CTC subset of CPP |
| chr12 | 12871099 | T | G,T    | T      | Heterozygous CTC subset of CPP |
| chr12 | 12967127 | C | C,T    | C,T    | Heterozygous CTC subset of CPP |
| chr12 | 14577540 | T | T      | T      | Heterozygous CTC subset of CPP |
| chr12 | 16055926 | G | +T,G,T | +T,G,T | Heterozygous CTC subset of CPP |
| chr12 | 16189172 | T | T      | T      | Heterozygous CTC subset of CPP |
| chr12 | 21661405 | G | G      | G      | Heterozygous CTC subset of CPP |
| chr12 | 21794885 | C | +CA,C  | +CA,C  | Heterozygous CTC subset of CPP |
| chr12 | 22213786 | C | C,T    | C      | Heterozygous CTC subset of CPP |
| chr12 | 25362777 | A | A,G    | A      | Heterozygous CTC subset of CPP |
| chr12 | 25398284 | C | A,C    | C      | Heterozygous CTC subset of CPP |
| chr12 | 27064232 | C | C,T    | C,T    | Heterozygous CTC subset of CPP |
| chr12 | 27075622 | A | A      | A      | Heterozygous CTC subset of CPP |
| chr12 | 27089578 | A | A      | A      | Heterozygous CTC subset of CPP |
| chr12 | 27152579 | T | T      | T      | Heterozygous CTC subset of CPP |
| chr12 | 27467558 | T | C,T    | T      | Heterozygous CTC subset of CPP |
| chr12 | 27867727 | G | A,G    | G      | Heterozygous CTC subset of CPP |
| chr12 | 29493733 | T | T      | T      | Heterozygous CTC subset of CPP |
| chr12 | 30792620 | A | A      | A      | Heterozygous CTC subset of CPP |
| chr12 | 30792628 | A | A      | A      | Heterozygous CTC subset of CPP |
| chr12 | 30823971 | A | A,G    | A      | Heterozygous CTC subset of CPP |
| chr12 | 31945070 | A | A      | A      | Heterozygous CTC subset of CPP |
| chr12 | 32890091 | A | A      | A      | Heterozygous CTC subset of CPP |
| chr12 | 32895594 | A | A      | A      | Heterozygous CTC subset of CPP |
| chr12 | 32897882 | C | C      | C      | Heterozygous CTC subset of CPP |
| chr12 | 33021934 | A | A      | A      | Heterozygous CTC subset of CPP |
| chr12 | 42716230 | T | T      | T      | Heterozygous CTC subset of CPP |
| chr12 | 42716247 | A | A      | A      | Heterozygous CTC subset of CPP |
| chr12 | 42768748 | C | C      | C      | Heterozygous CTC subset of CPP |
| chr12 | 45741819 | T | T      | T      | Heterozygous CTC subset of CPP |
| chr12 | 46321514 | A | A,T    | T      | Heterozygous CTC subset of CPP |
| chr12 | 46321978 | A | A      | A      | Heterozygous CTC subset of CPP |
| chr12 | 46322449 | C | C,T    | T      | Heterozygous CTC subset of CPP |
| chr12 | 46345509 | G | G      | G      | Heterozygous CTC subset of CPP |
| chr12 | 46355576 | T | T      | T      | Heterozygous CTC subset of CPP |
| chr12 | 46757599 | T | C,T    | T      | Heterozygous CTC subset of CPP |
| chr12 | 46764402 | A | A      | A      | Heterozygous CTC subset of CPP |
| chr12 | 48062848 | A | A      | A      | Heterozygous CTC subset of CPP |
| chr12 | 48359676 | G | G,T    | G      | Heterozygous CTC subset of CPP |
| chr12 | 48527186 | C | C,T    | C      | Heterozygous CTC subset of CPP |
| chr12 | 48539482 | T | G,T    | G      | Heterozygous CTC subset of CPP |
| chr12 | 49072875 | T | T      | T      | Heterozygous CTC subset of CPP |
| chr12 | 49224108 | G | C,G    | G      | Heterozygous CTC subset of CPP |
| chr12 | 49226211 | T | T      | T      | Heterozygous CTC subset of CPP |

Grillet et al., Supplementary Table 5

|       |          |   |     |     |                                |
|-------|----------|---|-----|-----|--------------------------------|
| chr12 | 49317584 | T | T   | T   | Heterozygous CTC subset of CPP |
| chr12 | 49332092 | G | A,G | A,G | Heterozygous CTC subset of CPP |
| chr12 | 49332237 | A | A   | A   | Heterozygous CTC subset of CPP |
| chr12 | 49332366 | C | C,T | C,T | Heterozygous CTC subset of CPP |
| chr12 | 49333799 | G | A,G | G   | Heterozygous CTC subset of CPP |
| chr12 | 49522275 | A | A   | A   | Heterozygous CTC subset of CPP |
| chr12 | 49522388 | A | A   | A   | Heterozygous CTC subset of CPP |
| chr12 | 49522473 | G | G   | G   | Heterozygous CTC subset of CPP |
| chr12 | 49522578 | T | C,T | T   | Heterozygous CTC subset of CPP |
| chr12 | 49522605 | C | C,T | C   | Heterozygous CTC subset of CPP |
| chr12 | 49666152 | G | A,G | G   | Heterozygous CTC subset of CPP |
| chr12 | 49666182 | G | A,G | G   | Heterozygous CTC subset of CPP |
| chr12 | 49666321 | C | C   | C   | Heterozygous CTC subset of CPP |
| chr12 | 49666509 | C | C,T | C,T | Heterozygous CTC subset of CPP |
| chr12 | 49667083 | T | T   | T   | Heterozygous CTC subset of CPP |
| chr12 | 49667084 | A | A   | A   | Heterozygous CTC subset of CPP |
| chr12 | 49893988 | G | G   | G   | Heterozygous CTC subset of CPP |
| chr12 | 49908378 | A | A   | A   | Heterozygous CTC subset of CPP |
| chr12 | 49918598 | T | T   | T   | Heterozygous CTC subset of CPP |
| chr12 | 49920028 | T | T   | T   | Heterozygous CTC subset of CPP |
| chr12 | 50384071 | C | C   | C   | Heterozygous CTC subset of CPP |
| chr12 | 50386077 | G | G,T | G   | Heterozygous CTC subset of CPP |
| chr12 | 50482354 | C | C   | C   | Heterozygous CTC subset of CPP |
| chr12 | 50524370 | C | C   | C   | Heterozygous CTC subset of CPP |
| chr12 | 50594665 | A | A   | A   | Heterozygous CTC subset of CPP |
| chr12 | 50854980 | T | T   | T   | Heterozygous CTC subset of CPP |
| chr12 | 51203371 | C | C,T | C   | Heterozygous CTC subset of CPP |
| chr12 | 51213492 | A | A   | A   | Heterozygous CTC subset of CPP |
| chr12 | 51442247 | T | T   | T   | Heterozygous CTC subset of CPP |
| chr12 | 51512480 | A | A   | A   | Heterozygous CTC subset of CPP |
| chr12 | 53291007 | C | C   | C   | Heterozygous CTC subset of CPP |
| chr12 | 53294381 | T | C,T | C,T | Heterozygous CTC subset of CPP |
| chr12 | 53294465 | A | A   | A   | Heterozygous CTC subset of CPP |
| chr12 | 53298769 | A | A,G | A   | Heterozygous CTC subset of CPP |
| chr12 | 53345510 | T | A,T | A,T | Heterozygous CTC subset of CPP |
| chr12 | 53412585 | C | C   | C   | Heterozygous CTC subset of CPP |
| chr12 | 53421962 | T | T   | T   | Heterozygous CTC subset of CPP |
| chr12 | 53427607 | A | A   | A   | Heterozygous CTC subset of CPP |
| chr12 | 53427815 | A | A   | A   | Heterozygous CTC subset of CPP |
| chr12 | 53467105 | A | A   | A   | Heterozygous CTC subset of CPP |
| chr12 | 53468546 | C | C   | C   | Heterozygous CTC subset of CPP |
| chr12 | 53647285 | G | G   | G   | Heterozygous CTC subset of CPP |
| chr12 | 53776816 | T | T   | T   | Heterozygous CTC subset of CPP |
| chr12 | 53777330 | C | C   | C   | Heterozygous CTC subset of CPP |
| chr12 | 53896864 | A | A   | A   | Heterozygous CTC subset of CPP |
| chr12 | 54577496 | T | T   | T   | Heterozygous CTC subset of CPP |

Grillet et al., Supplementary Table 5

|       |          |   |      |     |                                |
|-------|----------|---|------|-----|--------------------------------|
| chr12 | 54577504 | T | T    | T   | Heterozygous CTC subset of CPP |
| chr12 | 54677016 | G | G    | G   | Heterozygous CTC subset of CPP |
| chr12 | 54741833 | A | +G,A | A   | Heterozygous CTC subset of CPP |
| chr12 | 56151291 | T | C,T  | T   | Heterozygous CTC subset of CPP |
| chr12 | 56385969 | G | A,G  | G   | Heterozygous CTC subset of CPP |
| chr12 | 56386324 | T | T    | T   | Heterozygous CTC subset of CPP |
| chr12 | 56500867 | A | A    | A   | Heterozygous CTC subset of CPP |
| chr12 | 56510584 | G | G    | G   | Heterozygous CTC subset of CPP |
| chr12 | 56510585 | T | T    | T   | Heterozygous CTC subset of CPP |
| chr12 | 56553761 | A | A    | A   | Heterozygous CTC subset of CPP |
| chr12 | 56553763 | G | G    | G   | Heterozygous CTC subset of CPP |
| chr12 | 56555229 | C | C,T  | C   | Heterozygous CTC subset of CPP |
| chr12 | 56604222 | T | T    | T   | Heterozygous CTC subset of CPP |
| chr12 | 56604223 | T | T    | T   | Heterozygous CTC subset of CPP |
| chr12 | 56622875 | T | T    | T   | Heterozygous CTC subset of CPP |
| chr12 | 56679751 | A | A    | A   | Heterozygous CTC subset of CPP |
| chr12 | 56823976 | A | A    | A   | Heterozygous CTC subset of CPP |
| chr12 | 56823977 | C | C    | C   | Heterozygous CTC subset of CPP |
| chr12 | 56994762 | T | T    | T   | Heterozygous CTC subset of CPP |
| chr12 | 56997150 | A | A    | A   | Heterozygous CTC subset of CPP |
| chr12 | 56998429 | T | T    | T   | Heterozygous CTC subset of CPP |
| chr12 | 57006975 | A | A    | A   | Heterozygous CTC subset of CPP |
| chr12 | 57037743 | C | -C   | -C  | Heterozygous CTC subset of CPP |
| chr12 | 57065536 | T | C,T  | T   | Heterozygous CTC subset of CPP |
| chr12 | 57065607 | T | T    | T   | Heterozygous CTC subset of CPP |
| chr12 | 57065609 | T | T    | T   | Heterozygous CTC subset of CPP |
| chr12 | 57065610 | C | C    | C   | Heterozygous CTC subset of CPP |
| chr12 | 57065613 | T | T    | T   | Heterozygous CTC subset of CPP |
| chr12 | 57065621 | T | T    | T   | Heterozygous CTC subset of CPP |
| chr12 | 57106660 | A | A,T  | T   | Heterozygous CTC subset of CPP |
| chr12 | 57108203 | A | A,G  | A,G | Heterozygous CTC subset of CPP |
| chr12 | 57108471 | C | C    | C   | Heterozygous CTC subset of CPP |
| chr12 | 57133140 | T | G,T  | G,T | Heterozygous CTC subset of CPP |
| chr12 | 57490706 | G | G    | G   | Heterozygous CTC subset of CPP |
| chr12 | 57490887 | C | C    | C   | Heterozygous CTC subset of CPP |
| chr12 | 57498257 | A | A    | A   | Heterozygous CTC subset of CPP |
| chr12 | 57920655 | T | T    | T   | Heterozygous CTC subset of CPP |
| chr12 | 57920665 | A | A    | A   | Heterozygous CTC subset of CPP |
| chr12 | 57985204 | C | C,T  | C   | Heterozygous CTC subset of CPP |
| chr12 | 57994852 | A | A    | A   | Heterozygous CTC subset of CPP |
| chr12 | 58112189 | A | A,G  | A,G | Heterozygous CTC subset of CPP |
| chr12 | 58176614 | T | C,T  | T   | Heterozygous CTC subset of CPP |
| chr12 | 58190265 | T | T    | T   | Heterozygous CTC subset of CPP |
| chr12 | 58223285 | T | T    | T   | Heterozygous CTC subset of CPP |
| chr12 | 62778065 | A | A,G  | G   | Heterozygous CTC subset of CPP |
| chr12 | 64828667 | T | T    | T   | Heterozygous CTC subset of CPP |

Grillet et al., Supplementary Table 5

|       |          |   |     |     |                                |
|-------|----------|---|-----|-----|--------------------------------|
| chr12 | 65141581 | G | G   | G   | Heterozygous CTC subset of CPP |
| chr12 | 65141588 | C | C,T | C   | Heterozygous CTC subset of CPP |
| chr12 | 66546076 | A | A   | A   | Heterozygous CTC subset of CPP |
| chr12 | 66546100 | A | A,G | A   | Heterozygous CTC subset of CPP |
| chr12 | 67706466 | G | A,G | A   | Heterozygous CTC subset of CPP |
| chr12 | 68050991 | A | A   | A   | Heterozygous CTC subset of CPP |
| chr12 | 68051420 | C | A,C | C   | Heterozygous CTC subset of CPP |
| chr12 | 68052194 | T | T   | T   | Heterozygous CTC subset of CPP |
| chr12 | 69042539 | G | G   | G   | Heterozygous CTC subset of CPP |
| chr12 | 69082805 | G | A,G | G   | Heterozygous CTC subset of CPP |
| chr12 | 69083320 | A | A   | A   | Heterozygous CTC subset of CPP |
| chr12 | 69115698 | G | A,G | G   | Heterozygous CTC subset of CPP |
| chr12 | 69136239 | A | A   | A   | Heterozygous CTC subset of CPP |
| chr12 | 69230517 | A | A   | A   | Heterozygous CTC subset of CPP |
| chr12 | 69233120 | T | T   | T   | Heterozygous CTC subset of CPP |
| chr12 | 69233375 | C | C   | C   | Heterozygous CTC subset of CPP |
| chr12 | 69645083 | A | A   | A   | Heterozygous CTC subset of CPP |
| chr12 | 69646914 | G | A,G | A,G | Heterozygous CTC subset of CPP |
| chr12 | 69753802 | A | A   | A   | Heterozygous CTC subset of CPP |
| chr12 | 69981792 | A | C   | C   | Heterozygous CTC subset of CPP |
| chr12 | 70713139 | A | A   | A   | Heterozygous CTC subset of CPP |
| chr12 | 70723349 | A | A   | A   | Heterozygous CTC subset of CPP |
| chr12 | 70732452 | T | T   | T   | Heterozygous CTC subset of CPP |
| chr12 | 71533558 | A | A   | A   | Heterozygous CTC subset of CPP |
| chr12 | 72164395 | C | C,T | C   | Heterozygous CTC subset of CPP |
| chr12 | 74932159 | G | C,G | C   | Heterozygous CTC subset of CPP |
| chr12 | 75900177 | T | T   | T   | Heterozygous CTC subset of CPP |
| chr12 | 75900382 | C | C,T | C   | Heterozygous CTC subset of CPP |
| chr12 | 75900588 | A | A,G | A   | Heterozygous CTC subset of CPP |
| chr12 | 76424937 | T | C,T | C,T | Heterozygous CTC subset of CPP |
| chr12 | 76424940 | C | C,T | C,T | Heterozygous CTC subset of CPP |
| chr12 | 76424955 | G | G   | G   | Heterozygous CTC subset of CPP |
| chr12 | 76442241 | C | C   | C   | Heterozygous CTC subset of CPP |
| chr12 | 76442983 | T | C,T | T   | Heterozygous CTC subset of CPP |
| chr12 | 76443540 | T | T   | T   | Heterozygous CTC subset of CPP |
| chr12 | 76448802 | A | A,C | A   | Heterozygous CTC subset of CPP |
| chr12 | 76448803 | G | G   | G   | Heterozygous CTC subset of CPP |
| chr12 | 76449900 | T | C,T | C,T | Heterozygous CTC subset of CPP |
| chr12 | 76453966 | G | A,G | A,G | Heterozygous CTC subset of CPP |
| chr12 | 76454058 | G | G   | G   | Heterozygous CTC subset of CPP |
| chr12 | 76791594 | A | A   | A   | Heterozygous CTC subset of CPP |
| chr12 | 76844662 | T | T   | T   | Heterozygous CTC subset of CPP |
| chr12 | 80014907 | A | A,T | A,T | Heterozygous CTC subset of CPP |
| chr12 | 80169711 | A | A   | A   | Heterozygous CTC subset of CPP |
| chr12 | 80182445 | A | A   | A   | Heterozygous CTC subset of CPP |
| chr12 | 80189418 | A | A   | A   | Heterozygous CTC subset of CPP |

Grillet et al., Supplementary Table 5

|       |           |   |     |     |                                |
|-------|-----------|---|-----|-----|--------------------------------|
| chr12 | 80222229  | T | T   | T   | Heterozygous CTC subset of CPP |
| chr12 | 80328619  | G | G   | G   | Heterozygous CTC subset of CPP |
| chr12 | 82750933  | T | T   | T   | Heterozygous CTC subset of CPP |
| chr12 | 88439440  | T | T   | T   | Heterozygous CTC subset of CPP |
| chr12 | 89744506  | T | T   | T   | Heterozygous CTC subset of CPP |
| chr12 | 89745758  | A | A   | A   | Heterozygous CTC subset of CPP |
| chr12 | 89998019  | A | A,G | A   | Heterozygous CTC subset of CPP |
| chr12 | 90018077  | T | T   | T   | Heterozygous CTC subset of CPP |
| chr12 | 90020289  | C | C   | C   | Heterozygous CTC subset of CPP |
| chr12 | 90024317  | T | T   | T   | Heterozygous CTC subset of CPP |
| chr12 | 90028935  | A | A   | A   | Heterozygous CTC subset of CPP |
| chr12 | 90049466  | A | A   | A   | Heterozygous CTC subset of CPP |
| chr12 | 92538123  | T | T   | T   | Heterozygous CTC subset of CPP |
| chr12 | 95650936  | T | T   | T   | Heterozygous CTC subset of CPP |
| chr12 | 95650968  | A | A   | A   | Heterozygous CTC subset of CPP |
| chr12 | 95676318  | T | T   | T   | Heterozygous CTC subset of CPP |
| chr12 | 95906603  | C | A,C | C   | Heterozygous CTC subset of CPP |
| chr12 | 96259168  | T | C,T | T   | Heterozygous CTC subset of CPP |
| chr12 | 96259865  | A | A   | A   | Heterozygous CTC subset of CPP |
| chr12 | 96259866  | T | T   | T   | Heterozygous CTC subset of CPP |
| chr12 | 96407035  | A | A   | A   | Heterozygous CTC subset of CPP |
| chr12 | 98927830  | C | C,G | C   | Heterozygous CTC subset of CPP |
| chr12 | 100617632 | T | T   | T   | Heterozygous CTC subset of CPP |
| chr12 | 102108298 | A | A   | A   | Heterozygous CTC subset of CPP |
| chr12 | 102108301 | T | C,T | C,T | Heterozygous CTC subset of CPP |
| chr12 | 102108337 | G | G   | G   | Heterozygous CTC subset of CPP |
| chr12 | 102113935 | C | C,T | C   | Heterozygous CTC subset of CPP |
| chr12 | 102117589 | C | C,T | T   | Heterozygous CTC subset of CPP |
| chr12 | 102468145 | A | A   | A   | Heterozygous CTC subset of CPP |
| chr12 | 102494849 | T | C,T | T   | Heterozygous CTC subset of CPP |
| chr12 | 104327979 | C | C,T | C   | Heterozygous CTC subset of CPP |
| chr12 | 104341591 | T | T   | T   | Heterozygous CTC subset of CPP |
| chr12 | 104379504 | T | T   | T   | Heterozygous CTC subset of CPP |
| chr12 | 104380734 | G | A,G | G   | Heterozygous CTC subset of CPP |
| chr12 | 104721449 | G | G   | G   | Heterozygous CTC subset of CPP |
| chr12 | 106633585 | G | A,G | G   | Heterozygous CTC subset of CPP |
| chr12 | 106634019 | T | T   | T   | Heterozygous CTC subset of CPP |
| chr12 | 106641502 | G | G   | G   | Heterozygous CTC subset of CPP |
| chr12 | 108096769 | G | C,G | G   | Heterozygous CTC subset of CPP |
| chr12 | 108918146 | C | C,T | T   | Heterozygous CTC subset of CPP |
| chr12 | 108923950 | A | A,G | G   | Heterozygous CTC subset of CPP |
| chr12 | 108923966 | C | C,T | C   | Heterozygous CTC subset of CPP |
| chr12 | 108925038 | A | A   | A   | Heterozygous CTC subset of CPP |
| chr12 | 108929215 | A | A   | A   | Heterozygous CTC subset of CPP |
| chr12 | 108931972 | T | T   | T   | Heterozygous CTC subset of CPP |
| chr12 | 108931979 | C | C   | C   | Heterozygous CTC subset of CPP |

Grillet et al., Supplementary Table 5

|       |           |   |     |     |                                |
|-------|-----------|---|-----|-----|--------------------------------|
| chr12 | 108939022 | A | A   | A   | Heterozygous CTC subset of CPP |
| chr12 | 108941700 | C | C,G | C   | Heterozygous CTC subset of CPP |
| chr12 | 108954823 | C | C,T | T   | Heterozygous CTC subset of CPP |
| chr12 | 109994870 | A | A,T | A   | Heterozygous CTC subset of CPP |
| chr12 | 109996941 | T | A,T | T   | Heterozygous CTC subset of CPP |
| chr12 | 110006608 | A | A   | A   | Heterozygous CTC subset of CPP |
| chr12 | 110345430 | A | A   | A   | Heterozygous CTC subset of CPP |
| chr12 | 110461858 | T | T   | T   | Heterozygous CTC subset of CPP |
| chr12 | 110780107 | G | A,G | G   | Heterozygous CTC subset of CPP |
| chr12 | 110872753 | A | A   | A   | Heterozygous CTC subset of CPP |
| chr12 | 110872782 | A | A   | A   | Heterozygous CTC subset of CPP |
| chr12 | 110893429 | T | T   | T   | Heterozygous CTC subset of CPP |
| chr12 | 110897558 | G | A,G | G   | Heterozygous CTC subset of CPP |
| chr12 | 111956182 | A | A   | A   | Heterozygous CTC subset of CPP |
| chr12 | 112306589 | A | A   | A   | Heterozygous CTC subset of CPP |
| chr12 | 112308897 | A | A   | A   | Heterozygous CTC subset of CPP |
| chr12 | 112327904 | A | A   | A   | Heterozygous CTC subset of CPP |
| chr12 | 112516481 | A | A   | A   | Heterozygous CTC subset of CPP |
| chr12 | 112843744 | T | T   | T   | Heterozygous CTC subset of CPP |
| chr12 | 113624692 | T | T   | T   | Heterozygous CTC subset of CPP |
| chr12 | 114395651 | T | C,T | T   | Heterozygous CTC subset of CPP |
| chr12 | 114395663 | T | T   | T   | Heterozygous CTC subset of CPP |
| chr12 | 117158194 | A | A   | A   | Heterozygous CTC subset of CPP |
| chr12 | 117160976 | T | C,T | C,T | Heterozygous CTC subset of CPP |
| chr12 | 117584064 | A | A   | A   | Heterozygous CTC subset of CPP |
| chr12 | 117615411 | A | A   | A   | Heterozygous CTC subset of CPP |
| chr12 | 117624332 | T | T   | T   | Heterozygous CTC subset of CPP |
| chr12 | 120568556 | A | A   | A   | Heterozygous CTC subset of CPP |
| chr12 | 120568557 | T | T   | T   | Heterozygous CTC subset of CPP |
| chr12 | 120576660 | C | C   | C   | Heterozygous CTC subset of CPP |
| chr12 | 120582637 | A | A   | A   | Heterozygous CTC subset of CPP |
| chr12 | 120589160 | A | A,G | G   | Heterozygous CTC subset of CPP |
| chr12 | 120593190 | G | A,G | G   | Heterozygous CTC subset of CPP |
| chr12 | 120599826 | A | A   | A   | Heterozygous CTC subset of CPP |
| chr12 | 120600950 | T | T   | T   | Heterozygous CTC subset of CPP |
| chr12 | 120608023 | A | A   | A   | Heterozygous CTC subset of CPP |
| chr12 | 120652666 | A | A   | A   | Heterozygous CTC subset of CPP |
| chr12 | 120876289 | T | T   | T   | Heterozygous CTC subset of CPP |
| chr12 | 120884328 | C | C,T | C   | Heterozygous CTC subset of CPP |
| chr12 | 120966921 | A | A,G | A   | Heterozygous CTC subset of CPP |
| chr12 | 121014414 | G | G   | G   | Heterozygous CTC subset of CPP |
| chr12 | 121017680 | T | T   | T   | Heterozygous CTC subset of CPP |
| chr12 | 121784759 | C | C   | C   | Heterozygous CTC subset of CPP |
| chr12 | 121854130 | A | A   | A   | Heterozygous CTC subset of CPP |
| chr12 | 121868193 | G | G   | G   | Heterozygous CTC subset of CPP |
| chr12 | 121880038 | A | A   | A   | Heterozygous CTC subset of CPP |

Grillet et al., Supplementary Table 5

|       |           |   |     |     |                                |
|-------|-----------|---|-----|-----|--------------------------------|
| chr12 | 121881578 | A | A   | A   | Heterozygous CTC subset of CPP |
| chr12 | 122079554 | A | A   | A   | Heterozygous CTC subset of CPP |
| chr12 | 122353796 | A | A,G | A,G | Heterozygous CTC subset of CPP |
| chr12 | 122354242 | A | A   | A   | Heterozygous CTC subset of CPP |
| chr12 | 122622137 | G | G   | G   | Heterozygous CTC subset of CPP |
| chr12 | 122623000 | T | C,T | C,T | Heterozygous CTC subset of CPP |
| chr12 | 122745873 | A | A   | A   | Heterozygous CTC subset of CPP |
| chr12 | 122964842 | T | T   | T   | Heterozygous CTC subset of CPP |
| chr12 | 122964843 | T | T   | T   | Heterozygous CTC subset of CPP |
| chr12 | 122992990 | T | T   | T   | Heterozygous CTC subset of CPP |
| chr12 | 122992993 | A | A   | A   | Heterozygous CTC subset of CPP |
| chr12 | 123238350 | T | T   | T   | Heterozygous CTC subset of CPP |
| chr12 | 123252140 | T | T   | T   | Heterozygous CTC subset of CPP |
| chr12 | 123645803 | G | A,G | A   | Heterozygous CTC subset of CPP |
| chr12 | 123782687 | G | G   | G   | Heterozygous CTC subset of CPP |
| chr12 | 123789179 | T | T   | T   | Heterozygous CTC subset of CPP |
| chr12 | 123794282 | A | A   | A   | Heterozygous CTC subset of CPP |
| chr12 | 123799974 | A | A,G | G   | Heterozygous CTC subset of CPP |
| chr12 | 123806219 | C | C,T | C   | Heterozygous CTC subset of CPP |
| chr12 | 123808323 | G | G   | G   | Heterozygous CTC subset of CPP |
| chr12 | 123808330 | C | C   | C   | Heterozygous CTC subset of CPP |
| chr12 | 123810873 | G | A   | A   | Heterozygous CTC subset of CPP |
| chr12 | 123813392 | A | A   | A   | Heterozygous CTC subset of CPP |
| chr12 | 123813429 | T | T   | T   | Heterozygous CTC subset of CPP |
| chr12 | 123814996 | T | T   | T   | Heterozygous CTC subset of CPP |
| chr12 | 124104049 | A | A,G | A,G | Heterozygous CTC subset of CPP |
| chr12 | 124104686 | G | A,G | A,G | Heterozygous CTC subset of CPP |
| chr12 | 124106291 | A | A   | A   | Heterozygous CTC subset of CPP |
| chr12 | 124106292 | G | G   | G   | Heterozygous CTC subset of CPP |
| chr12 | 124116993 | T | T   | T   | Heterozygous CTC subset of CPP |
| chr12 | 124135598 | T | T   | T   | Heterozygous CTC subset of CPP |
| chr12 | 124144395 | A | A,G | A,G | Heterozygous CTC subset of CPP |
| chr12 | 124827664 | A | A   | A   | Heterozygous CTC subset of CPP |
| chr12 | 124832859 | A | A   | A   | Heterozygous CTC subset of CPP |
| chr12 | 124835261 | T | T   | T   | Heterozygous CTC subset of CPP |
| chr12 | 124839988 | G | G,T | G   | Heterozygous CTC subset of CPP |
| chr12 | 124846827 | T | T   | T   | Heterozygous CTC subset of CPP |
| chr12 | 124857086 | C | C   | C   | Heterozygous CTC subset of CPP |
| chr12 | 125284748 | A | A,G | G   | Heterozygous CTC subset of CPP |
| chr12 | 125396386 | G | G   | G   | Heterozygous CTC subset of CPP |
| chr12 | 125396488 | T | T   | T   | Heterozygous CTC subset of CPP |
| chr12 | 125397061 | G | A,G | G   | Heterozygous CTC subset of CPP |
| chr12 | 125397364 | A | A,G | A,G | Heterozygous CTC subset of CPP |
| chr12 | 125398039 | G | C,G | C,G | Heterozygous CTC subset of CPP |
| chr12 | 125438712 | C | A,C | C   | Heterozygous CTC subset of CPP |
| chr12 | 125441414 | A | A   | A   | Heterozygous CTC subset of CPP |

Grillet et al., Supplementary Table 5

|       |           |   |     |     |                                |
|-------|-----------|---|-----|-----|--------------------------------|
| chr12 | 125570984 | T | T   | T   | Heterozygous CTC subset of CPP |
| chr12 | 131357463 | T | T   | T   | Heterozygous CTC subset of CPP |
| chr12 | 131359094 | A | A   | A   | Heterozygous CTC subset of CPP |
| chr12 | 131359243 | A | A   | A   | Heterozygous CTC subset of CPP |
| chr12 | 131359244 | A | A   | A   | Heterozygous CTC subset of CPP |
| chr12 | 132210168 | G | G   | G   | Heterozygous CTC subset of CPP |
| chr12 | 132262750 | C | C   | C   | Heterozygous CTC subset of CPP |
| chr12 | 133159733 | C | C,T | C,T | Heterozygous CTC subset of CPP |
| chr12 | 133159846 | C | C,T | C   | Heterozygous CTC subset of CPP |
| chr12 | 133160238 | G | C,G | C,G | Heterozygous CTC subset of CPP |
| chr12 | 133160327 | C | C,G | C   | Heterozygous CTC subset of CPP |
| chr12 | 133244141 | T | T   | T   | Heterozygous CTC subset of CPP |
| chr12 | 133277872 | G | G   | G   | Heterozygous CTC subset of CPP |
| chr12 | 133287459 | C | C,T | T   | Heterozygous CTC subset of CPP |
| chr12 | 133306589 | C | C,T | C,T | Heterozygous CTC subset of CPP |
| chr12 | 133327373 | A | A   | A   | Heterozygous CTC subset of CPP |
| chr12 | 133331459 | G | C,G | G   | Heterozygous CTC subset of CPP |
| chr12 | 133358910 | T | T   | T   | Heterozygous CTC subset of CPP |
| chr12 | 133384531 | T | T   | T   | Heterozygous CTC subset of CPP |
| chr13 | 20224387  | A | A,G | A   | Heterozygous CTC subset of CPP |
| chr13 | 20580581  | A | A   | A   | Heterozygous CTC subset of CPP |
| chr13 | 20660093  | T | T   | T   | Heterozygous CTC subset of CPP |
| chr13 | 21948492  | T | T   | T   | Heterozygous CTC subset of CPP |
| chr13 | 21948495  | T | T   | T   | Heterozygous CTC subset of CPP |
| chr13 | 21948502  | T | C,T | C,T | Heterozygous CTC subset of CPP |
| chr13 | 21948570  | T | T   | T   | Heterozygous CTC subset of CPP |
| chr13 | 21949165  | T | C,T | T   | Heterozygous CTC subset of CPP |
| chr13 | 21949267  | T | C,T | T   | Heterozygous CTC subset of CPP |
| chr13 | 21987862  | T | T   | T   | Heterozygous CTC subset of CPP |
| chr13 | 22077138  | A | A   | A   | Heterozygous CTC subset of CPP |
| chr13 | 25009434  | T | T   | T   | Heterozygous CTC subset of CPP |
| chr13 | 25064878  | T | T   | T   | Heterozygous CTC subset of CPP |
| chr13 | 25670978  | C | T   | T   | Heterozygous CTC subset of CPP |
| chr13 | 25893477  | A | A   | A   | Heterozygous CTC subset of CPP |
| chr13 | 25895128  | T | T   | T   | Heterozygous CTC subset of CPP |
| chr13 | 25895129  | A | A   | A   | Heterozygous CTC subset of CPP |
| chr13 | 25895131  | A | A   | A   | Heterozygous CTC subset of CPP |
| chr13 | 26788114  | A | A   | A   | Heterozygous CTC subset of CPP |
| chr13 | 26788490  | C | C   | C   | Heterozygous CTC subset of CPP |
| chr13 | 26788774  | A | A   | A   | Heterozygous CTC subset of CPP |
| chr13 | 28009031  | G | C,G | C,G | Heterozygous CTC subset of CPP |
| chr13 | 28011269  | A | A   | A   | Heterozygous CTC subset of CPP |
| chr13 | 28239970  | G | A,G | G   | Heterozygous CTC subset of CPP |
| chr13 | 28748530  | G | G   | G   | Heterozygous CTC subset of CPP |
| chr13 | 30107019  | G | A,G | G   | Heterozygous CTC subset of CPP |
| chr13 | 30351296  | T | T   | T   | Heterozygous CTC subset of CPP |



Grillet et al., Supplementary Table 5

|       |          |   |     |     |                                |
|-------|----------|---|-----|-----|--------------------------------|
| chr13 | 31037400 | A | A   | A   | Heterozygous CTC subset of CPP |
| chr13 | 31729733 | A | A,C | A   | Heterozygous CTC subset of CPP |
| chr13 | 33110475 | T | T   | T   | Heterozygous CTC subset of CPP |
| chr13 | 33334748 | G | G   | G   | Heterozygous CTC subset of CPP |
| chr13 | 33344579 | C | C   | C   | Heterozygous CTC subset of CPP |
| chr13 | 37577115 | A | A   | A   | Heterozygous CTC subset of CPP |
| chr13 | 37580139 | G | A,G | G   | Heterozygous CTC subset of CPP |
| chr13 | 39588301 | G | G   | G   | Heterozygous CTC subset of CPP |
| chr13 | 39603498 | G | A,G | G   | Heterozygous CTC subset of CPP |
| chr13 | 41507735 | T | T   | T   | Heterozygous CTC subset of CPP |
| chr13 | 41515286 | T | A,T | A   | Heterozygous CTC subset of CPP |
| chr13 | 41515371 | C | C,T | C   | Heterozygous CTC subset of CPP |
| chr13 | 41517185 | T | T   | T   | Heterozygous CTC subset of CPP |
| chr13 | 41517985 | A | A,G | G   | Heterozygous CTC subset of CPP |
| chr13 | 41533052 | T | C,T | C   | Heterozygous CTC subset of CPP |
| chr13 | 41654918 | A | A   | A   | Heterozygous CTC subset of CPP |
| chr13 | 45841494 | A | A   | A   | Heterozygous CTC subset of CPP |
| chr13 | 45841502 | G | A,G | A,G | Heterozygous CTC subset of CPP |
| chr13 | 46538054 | A | A   | A   | Heterozygous CTC subset of CPP |
| chr13 | 46543124 | A | A   | A   | Heterozygous CTC subset of CPP |
| chr13 | 46543509 | T | T   | T   | Heterozygous CTC subset of CPP |
| chr13 | 46543513 | A | A   | A   | Heterozygous CTC subset of CPP |
| chr13 | 46577337 | G | G   | G   | Heterozygous CTC subset of CPP |
| chr13 | 46619100 | T | T   | T   | Heterozygous CTC subset of CPP |
| chr13 | 47263326 | A | A   | A   | Heterozygous CTC subset of CPP |
| chr13 | 48517466 | A | A   | A   | Heterozygous CTC subset of CPP |
| chr13 | 48523162 | A | A   | A   | Heterozygous CTC subset of CPP |
| chr13 | 48612039 | G | G   | G   | Heterozygous CTC subset of CPP |
| chr13 | 48951088 | A | A   | A   | Heterozygous CTC subset of CPP |
| chr13 | 50125566 | A | A   | A   | Heterozygous CTC subset of CPP |
| chr13 | 50235201 | A | A   | A   | Heterozygous CTC subset of CPP |
| chr13 | 50280301 | T | T   | T   | Heterozygous CTC subset of CPP |
| chr13 | 52603089 | T | G,T | G,T | Heterozygous CTC subset of CPP |
| chr13 | 52603147 | A | A,G | A,G | Heterozygous CTC subset of CPP |
| chr13 | 52603161 | G | A,G | A,G | Heterozygous CTC subset of CPP |
| chr13 | 52603483 | T | T   | T   | Heterozygous CTC subset of CPP |
| chr13 | 52603801 | T | G,T | G,T | Heterozygous CTC subset of CPP |
| chr13 | 52603847 | A | A   | A   | Heterozygous CTC subset of CPP |
| chr13 | 52603919 | G | G,T | G,T | Heterozygous CTC subset of CPP |
| chr13 | 52603921 | C | C,T | C,T | Heterozygous CTC subset of CPP |
| chr13 | 52604045 | G | G   | G   | Heterozygous CTC subset of CPP |
| chr13 | 52604880 | A | A,G | A,G | Heterozygous CTC subset of CPP |
| chr13 | 53030742 | G | G   | G   | Heterozygous CTC subset of CPP |
| chr13 | 53261916 | T | T   | T   | Heterozygous CTC subset of CPP |
| chr13 | 73337683 | A | A   | A   | Heterozygous CTC subset of CPP |
| chr13 | 73343048 | T | T   | T   | Heterozygous CTC subset of CPP |

Grillet et al., Supplementary Table 5

|       |           |   |      |      |                                |
|-------|-----------|---|------|------|--------------------------------|
| chr13 | 73345280  | T | T    | T    | Heterozygous CTC subset of CPP |
| chr13 | 73349359  | G | C,G  | C,G  | Heterozygous CTC subset of CPP |
| chr13 | 73350079  | T | C,T  | C,T  | Heterozygous CTC subset of CPP |
| chr13 | 73355117  | T | T    | T    | Heterozygous CTC subset of CPP |
| chr13 | 73355812  | C | C    | C    | Heterozygous CTC subset of CPP |
| chr13 | 75866284  | G | A,G  | A,G  | Heterozygous CTC subset of CPP |
| chr13 | 75900446  | T | T    | T    | Heterozygous CTC subset of CPP |
| chr13 | 75911148  | T | T    | T    | Heterozygous CTC subset of CPP |
| chr13 | 75923366  | T | T    | T    | Heterozygous CTC subset of CPP |
| chr13 | 75936636  | G | A,G  | G    | Heterozygous CTC subset of CPP |
| chr13 | 76100718  | T | T    | T    | Heterozygous CTC subset of CPP |
| chr13 | 76416987  | G | G    | G    | Heterozygous CTC subset of CPP |
| chr13 | 79896566  | T | T    | T    | Heterozygous CTC subset of CPP |
| chr13 | 79932455  | T | T    | T    | Heterozygous CTC subset of CPP |
| chr13 | 79932456  | T | T    | T    | Heterozygous CTC subset of CPP |
| chr13 | 79939745  | A | A    | A    | Heterozygous CTC subset of CPP |
| chr13 | 79940811  | T | C,T  | C,T  | Heterozygous CTC subset of CPP |
| chr13 | 79952944  | A | A    | A    | Heterozygous CTC subset of CPP |
| chr13 | 80910786  | C | A,C  | C    | Heterozygous CTC subset of CPP |
| chr13 | 80910851  | A | A,C  | A    | Heterozygous CTC subset of CPP |
| chr13 | 80910891  | T | T    | T    | Heterozygous CTC subset of CPP |
| chr13 | 80911525  | G | A,G  | G    | Heterozygous CTC subset of CPP |
| chr13 | 96412392  | A | A    | A    | Heterozygous CTC subset of CPP |
| chr13 | 107196405 | A | A    | A    | Heterozygous CTC subset of CPP |
| chr13 | 111176519 | G | G,T  | T    | Heterozygous CTC subset of CPP |
| chr13 | 111287934 | G | G    | G    | Heterozygous CTC subset of CPP |
| chr13 | 111293900 | T | T    | T    | Heterozygous CTC subset of CPP |
| chr13 | 111296741 | T | T    | T    | Heterozygous CTC subset of CPP |
| chr13 | 111340342 | G | A,G  | G    | Heterozygous CTC subset of CPP |
| chr13 | 111532060 | T | T    | T    | Heterozygous CTC subset of CPP |
| chr13 | 111955452 | A | A    | A    | Heterozygous CTC subset of CPP |
| chr13 | 114154419 | G | A,G  | G    | Heterozygous CTC subset of CPP |
| chr13 | 114292211 | G | G    | G    | Heterozygous CTC subset of CPP |
| chr13 | 114294634 | C | C    | C    | Heterozygous CTC subset of CPP |
| chr13 | 115002305 | G | A,G  | G    | Heterozygous CTC subset of CPP |
| chr13 | 115004914 | C | C,T  | C    | Heterozygous CTC subset of CPP |
| chr13 | 115004935 | T | C,T  | T    | Heterozygous CTC subset of CPP |
| chr13 | 115022655 | A | A    | A    | Heterozygous CTC subset of CPP |
| chr14 | 20781934  | T | T    | T    | Heterozygous CTC subset of CPP |
| chr14 | 20784718  | G | G,T  | G    | Heterozygous CTC subset of CPP |
| chr14 | 20924261  | G | -G,G | -G,G | Heterozygous CTC subset of CPP |
| chr14 | 20925154  | T | G,T  | G,T  | Heterozygous CTC subset of CPP |
| chr14 | 20928359  | C | A,C  | C    | Heterozygous CTC subset of CPP |
| chr14 | 20928947  | G | C,G  | G    | Heterozygous CTC subset of CPP |
| chr14 | 20940515  | C | C,T  | C    | Heterozygous CTC subset of CPP |
| chr14 | 20940606  | G | A,G  | A,G  | Heterozygous CTC subset of CPP |

Grillet et al., Supplementary Table 5

|       |          |   |      |     |                                |
|-------|----------|---|------|-----|--------------------------------|
| chr14 | 20940626 | C | C,T  | C,T | Heterozygous CTC subset of CPP |
| chr14 | 21679638 | C | C    | C   | Heterozygous CTC subset of CPP |
| chr14 | 21681137 | A | A    | A   | Heterozygous CTC subset of CPP |
| chr14 | 21681138 | T | T    | T   | Heterozygous CTC subset of CPP |
| chr14 | 21681274 | A | A    | A   | Heterozygous CTC subset of CPP |
| chr14 | 21829255 | A | A    | A   | Heterozygous CTC subset of CPP |
| chr14 | 21831052 | T | C,T  | C   | Heterozygous CTC subset of CPP |
| chr14 | 21831306 | A | +T,A | A   | Heterozygous CTC subset of CPP |
| chr14 | 21837449 | A | A    | A   | Heterozygous CTC subset of CPP |
| chr14 | 21838593 | T | T    | T   | Heterozygous CTC subset of CPP |
| chr14 | 21859794 | A | A    | A   | Heterozygous CTC subset of CPP |
| chr14 | 21861877 | A | A    | A   | Heterozygous CTC subset of CPP |
| chr14 | 21945415 | A | A,G  | A,G | Heterozygous CTC subset of CPP |
| chr14 | 21955822 | C | C    | C   | Heterozygous CTC subset of CPP |
| chr14 | 21967916 | A | A,G  | A,G | Heterozygous CTC subset of CPP |
| chr14 | 21979275 | C | C    | C   | Heterozygous CTC subset of CPP |
| chr14 | 21979276 | C | C    | C   | Heterozygous CTC subset of CPP |
| chr14 | 23044002 | G | G,T  | T   | Heterozygous CTC subset of CPP |
| chr14 | 23240328 | T | A,T  | A   | Heterozygous CTC subset of CPP |
| chr14 | 23240728 | A | A    | A   | Heterozygous CTC subset of CPP |
| chr14 | 23299135 | G | G,T  | G   | Heterozygous CTC subset of CPP |
| chr14 | 23299286 | T | C,T  | C   | Heterozygous CTC subset of CPP |
| chr14 | 23302643 | C | A,C  | C   | Heterozygous CTC subset of CPP |
| chr14 | 23371055 | G | C,G  | C,G | Heterozygous CTC subset of CPP |
| chr14 | 23391704 | T | C,T  | T   | Heterozygous CTC subset of CPP |
| chr14 | 23530739 | T | T    | T   | Heterozygous CTC subset of CPP |
| chr14 | 23530745 | T | T    | T   | Heterozygous CTC subset of CPP |
| chr14 | 23532193 | T | C,T  | T   | Heterozygous CTC subset of CPP |
| chr14 | 23777099 | G | A,G  | G   | Heterozygous CTC subset of CPP |
| chr14 | 23792273 | A | A    | A   | Heterozygous CTC subset of CPP |
| chr14 | 23792274 | A | A    | A   | Heterozygous CTC subset of CPP |
| chr14 | 23794543 | G | +A,G | G   | Heterozygous CTC subset of CPP |
| chr14 | 24035295 | T | T    | T   | Heterozygous CTC subset of CPP |
| chr14 | 24035329 | T | T    | T   | Heterozygous CTC subset of CPP |
| chr14 | 24568803 | T | T    | T   | Heterozygous CTC subset of CPP |
| chr14 | 24586561 | C | C    | C   | Heterozygous CTC subset of CPP |
| chr14 | 24587639 | G | A,G  | G   | Heterozygous CTC subset of CPP |
| chr14 | 24590726 | G | G    | G   | Heterozygous CTC subset of CPP |
| chr14 | 24613619 | A | A    | A   | Heterozygous CTC subset of CPP |
| chr14 | 24615435 | T | C,T  | T   | Heterozygous CTC subset of CPP |
| chr14 | 24653523 | G | C,G  | G   | Heterozygous CTC subset of CPP |
| chr14 | 24653954 | G | A,G  | G   | Heterozygous CTC subset of CPP |
| chr14 | 24653965 | C | C,T  | C,T | Heterozygous CTC subset of CPP |
| chr14 | 24654489 | T | C,T  | C,T | Heterozygous CTC subset of CPP |
| chr14 | 24658691 | A | A    | A   | Heterozygous CTC subset of CPP |
| chr14 | 24662177 | C | C,T  | C   | Heterozygous CTC subset of CPP |

Grillet et al., Supplementary Table 5

|       |          |   |      |      |                                |
|-------|----------|---|------|------|--------------------------------|
| chr14 | 24900880 | T | T    | T    | Heterozygous CTC subset of CPP |
| chr14 | 31112588 | T | T    | T    | Heterozygous CTC subset of CPP |
| chr14 | 31122778 | T | T    | T    | Heterozygous CTC subset of CPP |
| chr14 | 31139481 | T | T    | T    | Heterozygous CTC subset of CPP |
| chr14 | 31191720 | A | A    | A    | Heterozygous CTC subset of CPP |
| chr14 | 31576247 | A | A    | A    | Heterozygous CTC subset of CPP |
| chr14 | 31617965 | T | T    | T    | Heterozygous CTC subset of CPP |
| chr14 | 31619392 | T | C,T  | T    | Heterozygous CTC subset of CPP |
| chr14 | 31626153 | C | C    | C    | Heterozygous CTC subset of CPP |
| chr14 | 32559883 | C | C    | C    | Heterozygous CTC subset of CPP |
| chr14 | 32559924 | A | A,G  | A    | Heterozygous CTC subset of CPP |
| chr14 | 32562345 | G | G    | G    | Heterozygous CTC subset of CPP |
| chr14 | 32563284 | T | T    | T    | Heterozygous CTC subset of CPP |
| chr14 | 32563319 | G | G    | G    | Heterozygous CTC subset of CPP |
| chr14 | 34985645 | G | A,G  | A,G  | Heterozygous CTC subset of CPP |
| chr14 | 35037066 | T | T    | T    | Heterozygous CTC subset of CPP |
| chr14 | 35037139 | A | A    | A    | Heterozygous CTC subset of CPP |
| chr14 | 35099329 | T | T    | T    | Heterozygous CTC subset of CPP |
| chr14 | 35222806 | G | G    | G    | Heterozygous CTC subset of CPP |
| chr14 | 35224087 | T | T    | T    | Heterozygous CTC subset of CPP |
| chr14 | 35242828 | G | A,G  | G    | Heterozygous CTC subset of CPP |
| chr14 | 35331413 | T | T    | T    | Heterozygous CTC subset of CPP |
| chr14 | 35591174 | T | C,T  | C,T  | Heterozygous CTC subset of CPP |
| chr14 | 35780090 | C | C    | C    | Heterozygous CTC subset of CPP |
| chr14 | 35782247 | A | A    | A    | Heterozygous CTC subset of CPP |
| chr14 | 39644498 | G | A,G  | A,G  | Heterozygous CTC subset of CPP |
| chr14 | 39648629 | C | C,T  | C,T  | Heterozygous CTC subset of CPP |
| chr14 | 50085571 | G | A,G  | G    | Heterozygous CTC subset of CPP |
| chr14 | 50087717 | A | A    | A    | Heterozygous CTC subset of CPP |
| chr14 | 50100184 | A | A    | A    | Heterozygous CTC subset of CPP |
| chr14 | 50252007 | G | G    | G    | Heterozygous CTC subset of CPP |
| chr14 | 51716287 | C | +T,C | +T,C | Heterozygous CTC subset of CPP |
| chr14 | 51716467 | G | A,G  | G    | Heterozygous CTC subset of CPP |
| chr14 | 53113102 | T | T    | T    | Heterozygous CTC subset of CPP |
| chr14 | 53149125 | A | A    | A    | Heterozygous CTC subset of CPP |
| chr14 | 54417137 | C | A,C  | C    | Heterozygous CTC subset of CPP |
| chr14 | 54417522 | A | A,G  | A,G  | Heterozygous CTC subset of CPP |
| chr14 | 54418708 | A | A    | A    | Heterozygous CTC subset of CPP |
| chr14 | 55611941 | A | A    | A    | Heterozygous CTC subset of CPP |
| chr14 | 55817561 | G | G    | G    | Heterozygous CTC subset of CPP |
| chr14 | 55818087 | A | A    | A    | Heterozygous CTC subset of CPP |
| chr14 | 56079039 | A | A,T  | A    | Heterozygous CTC subset of CPP |
| chr14 | 56096731 | A | A,G  | A    | Heterozygous CTC subset of CPP |
| chr14 | 56146357 | G | A,G  | G    | Heterozygous CTC subset of CPP |
| chr14 | 58738627 | A | A    | A    | Heterozygous CTC subset of CPP |
| chr14 | 60611675 | G | A,G  | G    | Heterozygous CTC subset of CPP |

Grillet et al., Supplementary Table 5

|       |          |   |     |     |                                |
|-------|----------|---|-----|-----|--------------------------------|
| chr14 | 60622735 | A | A   | A   | Heterozygous CTC subset of CPP |
| chr14 | 61275146 | G | G   | G   | Heterozygous CTC subset of CPP |
| chr14 | 62193464 | C | C   | C   | Heterozygous CTC subset of CPP |
| chr14 | 62204932 | A | A   | A   | Heterozygous CTC subset of CPP |
| chr14 | 62212532 | T | T   | T   | Heterozygous CTC subset of CPP |
| chr14 | 64006397 | A | A   | A   | Heterozygous CTC subset of CPP |
| chr14 | 64886603 | T | T   | T   | Heterozygous CTC subset of CPP |
| chr14 | 64908845 | G | A,G | G   | Heterozygous CTC subset of CPP |
| chr14 | 64926513 | T | T   | T   | Heterozygous CTC subset of CPP |
| chr14 | 64988924 | T | C,T | C   | Heterozygous CTC subset of CPP |
| chr14 | 65544654 | T | T   | T   | Heterozygous CTC subset of CPP |
| chr14 | 68118132 | C | C,T | C   | Heterozygous CTC subset of CPP |
| chr14 | 69259662 | C | A,C | A,C | Heterozygous CTC subset of CPP |
| chr14 | 69376040 | G | A,G | G   | Heterozygous CTC subset of CPP |
| chr14 | 69928460 | T | T   | T   | Heterozygous CTC subset of CPP |
| chr14 | 73572696 | C | C   | C   | Heterozygous CTC subset of CPP |
| chr14 | 73678586 | T | T   | T   | Heterozygous CTC subset of CPP |
| chr14 | 73743458 | C | C,T | C   | Heterozygous CTC subset of CPP |
| chr14 | 75359670 | G | A,G | A   | Heterozygous CTC subset of CPP |
| chr14 | 75365107 | C | C   | C   | Heterozygous CTC subset of CPP |
| chr14 | 75367862 | A | A   | A   | Heterozygous CTC subset of CPP |
| chr14 | 75530263 | A | A   | A   | Heterozygous CTC subset of CPP |
| chr14 | 75590846 | A | A,T | T   | Heterozygous CTC subset of CPP |
| chr14 | 75614439 | T | T   | T   | Heterozygous CTC subset of CPP |
| chr14 | 75746690 | C | C,T | T   | Heterozygous CTC subset of CPP |
| chr14 | 75746820 | A | A   | A   | Heterozygous CTC subset of CPP |
| chr14 | 77926011 | C | C,T | T   | Heterozygous CTC subset of CPP |
| chr14 | 77935520 | G | A,G | A   | Heterozygous CTC subset of CPP |
| chr14 | 77978621 | A | A,C | A   | Heterozygous CTC subset of CPP |
| chr14 | 78018489 | T | T   | T   | Heterozygous CTC subset of CPP |
| chr14 | 78063608 | A | A   | A   | Heterozygous CTC subset of CPP |
| chr14 | 78183915 | T | T   | T   | Heterozygous CTC subset of CPP |
| chr14 | 78184566 | C | A,C | A,C | Heterozygous CTC subset of CPP |
| chr14 | 78197335 | T | T   | T   | Heterozygous CTC subset of CPP |
| chr14 | 78197365 | C | C,T | C,T | Heterozygous CTC subset of CPP |
| chr14 | 78217747 | A | A   | A   | Heterozygous CTC subset of CPP |
| chr14 | 89041145 | C | C   | C   | Heterozygous CTC subset of CPP |
| chr14 | 91925019 | T | T   | T   | Heterozygous CTC subset of CPP |
| chr14 | 91925027 | G | G,T | G,T | Heterozygous CTC subset of CPP |
| chr14 | 91951993 | A | A   | A   | Heterozygous CTC subset of CPP |
| chr14 | 92251587 | A | A,G | A,G | Heterozygous CTC subset of CPP |
| chr14 | 92609581 | T | T   | T   | Heterozygous CTC subset of CPP |
| chr14 | 92625374 | A | A   | A   | Heterozygous CTC subset of CPP |
| chr14 | 93170426 | T | T   | T   | Heterozygous CTC subset of CPP |
| chr14 | 93170428 | A | A   | A   | Heterozygous CTC subset of CPP |
| chr14 | 93172853 | T | T   | T   | Heterozygous CTC subset of CPP |

Grillet et al., Supplementary Table 5

|       |           |   |     |     |                                |
|-------|-----------|---|-----|-----|--------------------------------|
| chr14 | 93199080  | C | C   | C   | Heterozygous CTC subset of CPP |
| chr14 | 93407062  | A | A,G | G   | Heterozygous CTC subset of CPP |
| chr14 | 93407248  | A | A,G | G   | Heterozygous CTC subset of CPP |
| chr14 | 93407301  | C | A,C | C   | Heterozygous CTC subset of CPP |
| chr14 | 94526757  | T | T   | T   | Heterozygous CTC subset of CPP |
| chr14 | 94546047  | G | C,G | G   | Heterozygous CTC subset of CPP |
| chr14 | 96001383  | A | A,C | A   | Heterozygous CTC subset of CPP |
| chr14 | 96001630  | C | C,T | C   | Heterozygous CTC subset of CPP |
| chr14 | 96010424  | G | A,G | G   | Heterozygous CTC subset of CPP |
| chr14 | 96968799  | T | T   | T   | Heterozygous CTC subset of CPP |
| chr14 | 97003374  | T | T   | T   | Heterozygous CTC subset of CPP |
| chr14 | 97008632  | T | T   | T   | Heterozygous CTC subset of CPP |
| chr14 | 97010595  | G | G   | G   | Heterozygous CTC subset of CPP |
| chr14 | 97327040  | A | A   | A   | Heterozygous CTC subset of CPP |
| chr14 | 99879289  | A | A   | A   | Heterozygous CTC subset of CPP |
| chr14 | 99929855  | G | G   | G   | Heterozygous CTC subset of CPP |
| chr14 | 99959198  | A | A   | A   | Heterozygous CTC subset of CPP |
| chr14 | 99967750  | G | G   | G   | Heterozygous CTC subset of CPP |
| chr14 | 100705806 | T | T   | T   | Heterozygous CTC subset of CPP |
| chr14 | 100808845 | G | A,G | A   | Heterozygous CTC subset of CPP |
| chr14 | 102493761 | A | A,G | A   | Heterozygous CTC subset of CPP |
| chr14 | 102508621 | G | G   | G   | Heterozygous CTC subset of CPP |
| chr14 | 102510354 | T | T   | T   | Heterozygous CTC subset of CPP |
| chr14 | 102514227 | T | C,T | T   | Heterozygous CTC subset of CPP |
| chr14 | 102548703 | T | G,T | T   | Heterozygous CTC subset of CPP |
| chr14 | 102550803 | G | A,G | A   | Heterozygous CTC subset of CPP |
| chr14 | 102551195 | T | T   | T   | Heterozygous CTC subset of CPP |
| chr14 | 102815042 | C | C,T | C,T | Heterozygous CTC subset of CPP |
| chr14 | 103188533 | A | A   | A   | Heterozygous CTC subset of CPP |
| chr14 | 103450007 | C | C   | C   | Heterozygous CTC subset of CPP |
| chr14 | 103931979 | T | T   | T   | Heterozygous CTC subset of CPP |
| chr14 | 103932325 | T | T   | T   | Heterozygous CTC subset of CPP |
| chr14 | 103986255 | C | C,T | C   | Heterozygous CTC subset of CPP |
| chr14 | 104027078 | T | T   | T   | Heterozygous CTC subset of CPP |
| chr14 | 104027085 | A | A   | A   | Heterozygous CTC subset of CPP |
| chr14 | 104038108 | A | A   | A   | Heterozygous CTC subset of CPP |
| chr14 | 104129093 | T | T   | T   | Heterozygous CTC subset of CPP |
| chr14 | 104139423 | A | A   | A   | Heterozygous CTC subset of CPP |
| chr14 | 104143783 | G | G   | G   | Heterozygous CTC subset of CPP |
| chr14 | 104381502 | T | C,T | T   | Heterozygous CTC subset of CPP |
| chr14 | 105180706 | A | C,G | C,G | Heterozygous CTC subset of CPP |
| chr14 | 105222037 | C | C,T | C,T | Heterozygous CTC subset of CPP |
| chr14 | 105239894 | C | C,T | C   | Heterozygous CTC subset of CPP |
| chr14 | 105349556 | A | A   | A   | Heterozygous CTC subset of CPP |
| chr14 | 105350178 | C | C,T | C   | Heterozygous CTC subset of CPP |
| chr14 | 105350267 | T | T   | T   | Heterozygous CTC subset of CPP |

Grillet et al., Supplementary Table 5

|       |           |   |      |     |                                |
|-------|-----------|---|------|-----|--------------------------------|
| chr14 | 105351855 | T | T    | T   | Heterozygous CTC subset of CPP |
| chr14 | 105352417 | T | T    | T   | Heterozygous CTC subset of CPP |
| chr14 | 105354067 | T | T    | T   | Heterozygous CTC subset of CPP |
| chr14 | 105356094 | A | A    | A   | Heterozygous CTC subset of CPP |
| chr14 | 105639535 | C | C    | C   | Heterozygous CTC subset of CPP |
| chr14 | 105716655 | A | A    | A   | Heterozygous CTC subset of CPP |
| chr14 | 105859181 | G | G    | G   | Heterozygous CTC subset of CPP |
| chr14 | 105965102 | G | G    | G   | Heterozygous CTC subset of CPP |
| chr15 | 22958331  | A | A    | A   | Heterozygous CTC subset of CPP |
| chr15 | 23002962  | A | A    | A   | Heterozygous CTC subset of CPP |
| chr15 | 25584237  | C | C    | C   | Heterozygous CTC subset of CPP |
| chr15 | 25599768  | A | A    | A   | Heterozygous CTC subset of CPP |
| chr15 | 25601099  | T | T    | T   | Heterozygous CTC subset of CPP |
| chr15 | 25615929  | G | G    | G   | Heterozygous CTC subset of CPP |
| chr15 | 25616453  | T | T    | T   | Heterozygous CTC subset of CPP |
| chr15 | 25616491  | T | T    | T   | Heterozygous CTC subset of CPP |
| chr15 | 29996475  | A | A    | A   | Heterozygous CTC subset of CPP |
| chr15 | 30018993  | A | A    | A   | Heterozygous CTC subset of CPP |
| chr15 | 30034961  | T | T    | T   | Heterozygous CTC subset of CPP |
| chr15 | 30058477  | T | T    | T   | Heterozygous CTC subset of CPP |
| chr15 | 30058478  | T | T    | T   | Heterozygous CTC subset of CPP |
| chr15 | 30064337  | A | A    | A   | Heterozygous CTC subset of CPP |
| chr15 | 30092873  | T | T    | T   | Heterozygous CTC subset of CPP |
| chr15 | 32929098  | A | A    | A   | Heterozygous CTC subset of CPP |
| chr15 | 34295357  | T | T    | T   | Heterozygous CTC subset of CPP |
| chr15 | 34522110  | T | T    | T   | Heterozygous CTC subset of CPP |
| chr15 | 34656468  | T | T    | T   | Heterozygous CTC subset of CPP |
| chr15 | 35273620  | C | C,T  | C,T | Heterozygous CTC subset of CPP |
| chr15 | 35273777  | T | -T,T | T   | Heterozygous CTC subset of CPP |
| chr15 | 38765728  | T | T    | T   | Heterozygous CTC subset of CPP |
| chr15 | 40247943  | T | T    | T   | Heterozygous CTC subset of CPP |
| chr15 | 40330588  | A | A    | A   | Heterozygous CTC subset of CPP |
| chr15 | 40509847  | T | T    | T   | Heterozygous CTC subset of CPP |
| chr15 | 40711349  | C | C    | C   | Heterozygous CTC subset of CPP |
| chr15 | 40993309  | A | A    | A   | Heterozygous CTC subset of CPP |
| chr15 | 41146078  | A | A    | A   | Heterozygous CTC subset of CPP |
| chr15 | 41571051  | T | T    | T   | Heterozygous CTC subset of CPP |
| chr15 | 41650410  | G | G    | G   | Heterozygous CTC subset of CPP |
| chr15 | 42211486  | A | A,G  | A,G | Heterozygous CTC subset of CPP |
| chr15 | 42211708  | C | A,C  | C   | Heterozygous CTC subset of CPP |
| chr15 | 42235316  | C | C,T  | C,T | Heterozygous CTC subset of CPP |
| chr15 | 42525427  | A | A    | A   | Heterozygous CTC subset of CPP |
| chr15 | 43730554  | A | A    | A   | Heterozygous CTC subset of CPP |
| chr15 | 44046091  | A | A    | A   | Heterozygous CTC subset of CPP |
| chr15 | 44048960  | T | T    | T   | Heterozygous CTC subset of CPP |
| chr15 | 44673172  | A | A    | A   | Heterozygous CTC subset of CPP |

Grillet et al., Supplementary Table 5

|       |          |   |      |      |                                |
|-------|----------|---|------|------|--------------------------------|
| chr15 | 44849834 | A | A    | A    | Heterozygous CTC subset of CPP |
| chr15 | 49170866 | C | C    | C    | Heterozygous CTC subset of CPP |
| chr15 | 49436466 | T | T    | T    | Heterozygous CTC subset of CPP |
| chr15 | 50581796 | C | C    | C    | Heterozygous CTC subset of CPP |
| chr15 | 50782703 | A | A,G  | A,G  | Heterozygous CTC subset of CPP |
| chr15 | 50866528 | A | A    | A    | Heterozygous CTC subset of CPP |
| chr15 | 52200997 | A | A    | A    | Heterozygous CTC subset of CPP |
| chr15 | 52257981 | T | T    | T    | Heterozygous CTC subset of CPP |
| chr15 | 52357026 | T | T    | T    | Heterozygous CTC subset of CPP |
| chr15 | 55652777 | C | C    | C    | Heterozygous CTC subset of CPP |
| chr15 | 57565329 | A | A    | A    | Heterozygous CTC subset of CPP |
| chr15 | 58000981 | C | C,T  | T    | Heterozygous CTC subset of CPP |
| chr15 | 58902588 | A | A    | A    | Heterozygous CTC subset of CPP |
| chr15 | 58904178 | A | A    | A    | Heterozygous CTC subset of CPP |
| chr15 | 59186743 | A | A    | A    | Heterozygous CTC subset of CPP |
| chr15 | 59964846 | T | T    | T    | Heterozygous CTC subset of CPP |
| chr15 | 59981390 | G | G    | G    | Heterozygous CTC subset of CPP |
| chr15 | 60639887 | T | T    | T    | Heterozygous CTC subset of CPP |
| chr15 | 60641374 | A | A    | A    | Heterozygous CTC subset of CPP |
| chr15 | 60641393 | T | T    | T    | Heterozygous CTC subset of CPP |
| chr15 | 60644647 | T | T    | T    | Heterozygous CTC subset of CPP |
| chr15 | 60644648 | T | T    | T    | Heterozygous CTC subset of CPP |
| chr15 | 63829241 | C | C    | C    | Heterozygous CTC subset of CPP |
| chr15 | 63866317 | T | T    | T    | Heterozygous CTC subset of CPP |
| chr15 | 64388207 | A | A    | A    | Heterozygous CTC subset of CPP |
| chr15 | 64419374 | G | G,T  | G    | Heterozygous CTC subset of CPP |
| chr15 | 64454354 | C | +T,C | +T,C | Heterozygous CTC subset of CPP |
| chr15 | 64658182 | T | T    | T    | Heterozygous CTC subset of CPP |
| chr15 | 64658183 | A | A,G  | A    | Heterozygous CTC subset of CPP |
| chr15 | 64981368 | T | T    | T    | Heterozygous CTC subset of CPP |
| chr15 | 65313940 | G | G    | G    | Heterozygous CTC subset of CPP |
| chr15 | 65321932 | C | C    | C    | Heterozygous CTC subset of CPP |
| chr15 | 65421399 | T | T    | T    | Heterozygous CTC subset of CPP |
| chr15 | 65856653 | G | A,G  | A,G  | Heterozygous CTC subset of CPP |
| chr15 | 65868694 | C | C    | C    | Heterozygous CTC subset of CPP |
| chr15 | 66679649 | T | +C,T | +C,T | Heterozygous CTC subset of CPP |
| chr15 | 66813430 | T | T    | T    | Heterozygous CTC subset of CPP |
| chr15 | 66813538 | A | A    | A    | Heterozygous CTC subset of CPP |
| chr15 | 66840867 | A | A    | A    | Heterozygous CTC subset of CPP |
| chr15 | 67457698 | A | A,G  | A    | Heterozygous CTC subset of CPP |
| chr15 | 67528374 | T | G,T  | G,T  | Heterozygous CTC subset of CPP |
| chr15 | 68500461 | A | A    | A    | Heterozygous CTC subset of CPP |
| chr15 | 68582100 | A | A    | A    | Heterozygous CTC subset of CPP |
| chr15 | 68582842 | C | C    | C    | Heterozygous CTC subset of CPP |
| chr15 | 68582843 | A | A    | A    | Heterozygous CTC subset of CPP |
| chr15 | 69072792 | G | A,G  | G    | Heterozygous CTC subset of CPP |



Grillet et al., Supplementary Table 5

|       |          |   |      |      |                                |
|-------|----------|---|------|------|--------------------------------|
| chr15 | 69075304 | T | T    | T    | Heterozygous CTC subset of CPP |
| chr15 | 69079753 | A | A    | A    | Heterozygous CTC subset of CPP |
| chr15 | 69714054 | T | T    | T    | Heterozygous CTC subset of CPP |
| chr15 | 69718502 | T | T    | T    | Heterozygous CTC subset of CPP |
| chr15 | 69729026 | T | T    | T    | Heterozygous CTC subset of CPP |
| chr15 | 69732786 | A | A    | A    | Heterozygous CTC subset of CPP |
| chr15 | 70346923 | C | T    | T    | Heterozygous CTC subset of CPP |
| chr15 | 70349834 | A | A    | A    | Heterozygous CTC subset of CPP |
| chr15 | 70959075 | T | T    | T    | Heterozygous CTC subset of CPP |
| chr15 | 70959196 | T | T    | T    | Heterozygous CTC subset of CPP |
| chr15 | 70961563 | T | T    | T    | Heterozygous CTC subset of CPP |
| chr15 | 70991942 | C | C    | C    | Heterozygous CTC subset of CPP |
| chr15 | 72494963 | T | -T,T | -T,T | Heterozygous CTC subset of CPP |
| chr15 | 72494967 | G | G,T  | G,T  | Heterozygous CTC subset of CPP |
| chr15 | 72873318 | T | T    | T    | Heterozygous CTC subset of CPP |
| chr15 | 73044889 | T | T    | T    | Heterozygous CTC subset of CPP |
| chr15 | 73052845 | A | A,G  | A,G  | Heterozygous CTC subset of CPP |
| chr15 | 73052867 | A | A    | A    | Heterozygous CTC subset of CPP |
| chr15 | 74963886 | G | A,G  | G    | Heterozygous CTC subset of CPP |
| chr15 | 74964001 | C | C,T  | C    | Heterozygous CTC subset of CPP |
| chr15 | 74964009 | A | A    | A    | Heterozygous CTC subset of CPP |
| chr15 | 75129583 | A | A    | A    | Heterozygous CTC subset of CPP |
| chr15 | 75130842 | A | A    | A    | Heterozygous CTC subset of CPP |
| chr15 | 75131959 | A | A,G  | A,G  | Heterozygous CTC subset of CPP |
| chr15 | 75189930 | A | A,G  | A,G  | Heterozygous CTC subset of CPP |
| chr15 | 75212671 | T | T    | T    | Heterozygous CTC subset of CPP |
| chr15 | 75498744 | G | C,G  | C,G  | Heterozygous CTC subset of CPP |
| chr15 | 75501028 | A | A    | A    | Heterozygous CTC subset of CPP |
| chr15 | 75631445 | G | +A,G | +A,G | Heterozygous CTC subset of CPP |
| chr15 | 75648748 | A | A    | A    | Heterozygous CTC subset of CPP |
| chr15 | 75650836 | G | A,G  | A    | Heterozygous CTC subset of CPP |
| chr15 | 75652510 | C | C,T  | C    | Heterozygous CTC subset of CPP |
| chr15 | 75656508 | G | G    | G    | Heterozygous CTC subset of CPP |
| chr15 | 75664434 | A | A    | A    | Heterozygous CTC subset of CPP |
| chr15 | 75676709 | C | C    | C    | Heterozygous CTC subset of CPP |
| chr15 | 75763079 | A | A    | A    | Heterozygous CTC subset of CPP |
| chr15 | 75772251 | T | T    | T    | Heterozygous CTC subset of CPP |
| chr15 | 75890953 | G | G,T  | G    | Heterozygous CTC subset of CPP |
| chr15 | 75901914 | T | T    | T    | Heterozygous CTC subset of CPP |
| chr15 | 75909885 | A | A    | A    | Heterozygous CTC subset of CPP |
| chr15 | 75932129 | G | G,T  | G    | Heterozygous CTC subset of CPP |
| chr15 | 76168577 | T | T    | T    | Heterozygous CTC subset of CPP |
| chr15 | 76209692 | T | T    | T    | Heterozygous CTC subset of CPP |
| chr15 | 76225373 | T | T    | T    | Heterozygous CTC subset of CPP |
| chr15 | 76578762 | G | A,G  | G    | Heterozygous CTC subset of CPP |
| chr15 | 77750806 | T | T    | T    | Heterozygous CTC subset of CPP |

Grillet et al., Supplementary Table 5

|       |           |   |      |     |                                |
|-------|-----------|---|------|-----|--------------------------------|
| chr15 | 78295774  | T | T    | T   | Heterozygous CTC subset of CPP |
| chr15 | 78441769  | T | C,T  | C   | Heterozygous CTC subset of CPP |
| chr15 | 78582376  | T | T    | T   | Heterozygous CTC subset of CPP |
| chr15 | 78757730  | G | G    | G   | Heterozygous CTC subset of CPP |
| chr15 | 78780158  | A | A    | A   | Heterozygous CTC subset of CPP |
| chr15 | 78786549  | A | A    | A   | Heterozygous CTC subset of CPP |
| chr15 | 78789488  | C | C,T  | C,T | Heterozygous CTC subset of CPP |
| chr15 | 78789514  | A | A    | A   | Heterozygous CTC subset of CPP |
| chr15 | 78841220  | T | C,T  | C   | Heterozygous CTC subset of CPP |
| chr15 | 78882254  | T | T    | T   | Heterozygous CTC subset of CPP |
| chr15 | 80137560  | T | C,T  | T   | Heterozygous CTC subset of CPP |
| chr15 | 80450466  | T | T    | T   | Heterozygous CTC subset of CPP |
| chr15 | 81234335  | T | T    | T   | Heterozygous CTC subset of CPP |
| chr15 | 81271632  | C | +T,C | C   | Heterozygous CTC subset of CPP |
| chr15 | 82823354  | T | T    | T   | Heterozygous CTC subset of CPP |
| chr15 | 83680329  | G | A,G  | G   | Heterozygous CTC subset of CPP |
| chr15 | 83698906  | C | C,T  | C   | Heterozygous CTC subset of CPP |
| chr15 | 85342023  | A | A    | A   | Heterozygous CTC subset of CPP |
| chr15 | 85660999  | T | T    | T   | Heterozygous CTC subset of CPP |
| chr15 | 85679794  | T | T    | T   | Heterozygous CTC subset of CPP |
| chr15 | 89011232  | G | G,T  | G   | Heterozygous CTC subset of CPP |
| chr15 | 89736466  | A | A    | A   | Heterozygous CTC subset of CPP |
| chr15 | 89811733  | A | A    | A   | Heterozygous CTC subset of CPP |
| chr15 | 89862278  | T | T    | T   | Heterozygous CTC subset of CPP |
| chr15 | 89868822  | A | A    | A   | Heterozygous CTC subset of CPP |
| chr15 | 89868881  | A | A    | A   | Heterozygous CTC subset of CPP |
| chr15 | 89870185  | T | T    | T   | Heterozygous CTC subset of CPP |
| chr15 | 90380953  | A | A    | A   | Heterozygous CTC subset of CPP |
| chr15 | 90446475  | C | C    | C   | Heterozygous CTC subset of CPP |
| chr15 | 90610927  | A | A    | A   | Heterozygous CTC subset of CPP |
| chr15 | 90610932  | A | A    | A   | Heterozygous CTC subset of CPP |
| chr15 | 90628591  | G | A,G  | G   | Heterozygous CTC subset of CPP |
| chr15 | 90818693  | A | G    | G   | Heterozygous CTC subset of CPP |
| chr15 | 91010776  | T | C,T  | C,T | Heterozygous CTC subset of CPP |
| chr15 | 91423501  | C | C    | C   | Heterozygous CTC subset of CPP |
| chr15 | 91423979  | T | T    | T   | Heterozygous CTC subset of CPP |
| chr15 | 91449654  | T | C,T  | T   | Heterozygous CTC subset of CPP |
| chr15 | 91449702  | A | A,T  | A   | Heterozygous CTC subset of CPP |
| chr15 | 91493812  | T | T    | T   | Heterozygous CTC subset of CPP |
| chr15 | 91512694  | T | T    | T   | Heterozygous CTC subset of CPP |
| chr15 | 93470537  | T | T    | T   | Heterozygous CTC subset of CPP |
| chr15 | 93485129  | A | A    | A   | Heterozygous CTC subset of CPP |
| chr15 | 93485132  | A | A    | A   | Heterozygous CTC subset of CPP |
| chr15 | 93567738  | T | T    | T   | Heterozygous CTC subset of CPP |
| chr15 | 96877676  | G | A,G  | G   | Heterozygous CTC subset of CPP |
| chr15 | 100185885 | T | T    | T   | Heterozygous CTC subset of CPP |

Grillet et al., Supplementary Table 5

|       |           |   |      |      |                                |
|-------|-----------|---|------|------|--------------------------------|
| chr15 | 101718258 | T | T    | T    | Heterozygous CTC subset of CPP |
| chr15 | 101718414 | T | T    | T    | Heterozygous CTC subset of CPP |
| chr15 | 101719169 | T | T    | T    | Heterozygous CTC subset of CPP |
| chr15 | 101906465 | A | A    | A    | Heterozygous CTC subset of CPP |
| chr15 | 101972241 | T | T    | T    | Heterozygous CTC subset of CPP |
| chr16 | 138772    | A | +G,A | +G,A | Heterozygous CTC subset of CPP |
| chr16 | 338085    | G | G,T  | G    | Heterozygous CTC subset of CPP |
| chr16 | 339482    | A | A    | A    | Heterozygous CTC subset of CPP |
| chr16 | 347184    | A | A,G  | A    | Heterozygous CTC subset of CPP |
| chr16 | 348222    | C | C,T  | C    | Heterozygous CTC subset of CPP |
| chr16 | 397044    | G | G,T  | G    | Heterozygous CTC subset of CPP |
| chr16 | 417445    | T | T    | T    | Heterozygous CTC subset of CPP |
| chr16 | 417757    | T | C,T  | T    | Heterozygous CTC subset of CPP |
| chr16 | 419092    | A | A,G  | A    | Heterozygous CTC subset of CPP |
| chr16 | 419154    | G | A,G  | G    | Heterozygous CTC subset of CPP |
| chr16 | 420140    | G | A,G  | G    | Heterozygous CTC subset of CPP |
| chr16 | 426432    | T | C,T  | T    | Heterozygous CTC subset of CPP |
| chr16 | 427479    | T | C,T  | T    | Heterozygous CTC subset of CPP |
| chr16 | 427784    | G | A,G  | G    | Heterozygous CTC subset of CPP |
| chr16 | 427820    | C | C,T  | C    | Heterozygous CTC subset of CPP |
| chr16 | 449659    | G | A,G  | G    | Heterozygous CTC subset of CPP |
| chr16 | 450309    | C | C,T  | C    | Heterozygous CTC subset of CPP |
| chr16 | 570469    | A | A    | A    | Heterozygous CTC subset of CPP |
| chr16 | 597119    | T | T    | T    | Heterozygous CTC subset of CPP |
| chr16 | 597219    | C | C    | C    | Heterozygous CTC subset of CPP |
| chr16 | 602313    | C | A,C  | C    | Heterozygous CTC subset of CPP |
| chr16 | 602743    | T | T    | T    | Heterozygous CTC subset of CPP |
| chr16 | 603471    | A | A,G  | A,G  | Heterozygous CTC subset of CPP |
| chr16 | 633353    | T | C,T  | C,T  | Heterozygous CTC subset of CPP |
| chr16 | 633354    | G | A,G  | A,G  | Heterozygous CTC subset of CPP |
| chr16 | 633479    | A | A    | A    | Heterozygous CTC subset of CPP |
| chr16 | 676029    | T | T    | T    | Heterozygous CTC subset of CPP |
| chr16 | 684500    | T | T    | T    | Heterozygous CTC subset of CPP |
| chr16 | 685694    | T | T    | T    | Heterozygous CTC subset of CPP |
| chr16 | 711941    | G | G    | G    | Heterozygous CTC subset of CPP |
| chr16 | 715701    | C | C    | C    | Heterozygous CTC subset of CPP |
| chr16 | 718514    | C | C,G  | C    | Heterozygous CTC subset of CPP |
| chr16 | 720986    | G | A,G  | A,G  | Heterozygous CTC subset of CPP |
| chr16 | 722331    | C | C,T  | C,T  | Heterozygous CTC subset of CPP |
| chr16 | 722548    | A | A,G  | A,G  | Heterozygous CTC subset of CPP |
| chr16 | 732288    | C | -C,C | -C,C | Heterozygous CTC subset of CPP |
| chr16 | 772437    | T | T    | T    | Heterozygous CTC subset of CPP |
| chr16 | 778024    | T | T    | T    | Heterozygous CTC subset of CPP |
| chr16 | 778158    | C | C    | C    | Heterozygous CTC subset of CPP |
| chr16 | 778820    | G | G    | G    | Heterozygous CTC subset of CPP |
| chr16 | 786302    | T | T    | T    | Heterozygous CTC subset of CPP |

Grillet et al., Supplementary Table 5

|       |         |   |     |     |                                |
|-------|---------|---|-----|-----|--------------------------------|
| chr16 | 836927  | A | A   | A   | Heterozygous CTC subset of CPP |
| chr16 | 842450  | C | C,T | C   | Heterozygous CTC subset of CPP |
| chr16 | 847743  | C | C,T | C   | Heterozygous CTC subset of CPP |
| chr16 | 1401599 | G | G   | G   | Heterozygous CTC subset of CPP |
| chr16 | 1498742 | A | A   | A   | Heterozygous CTC subset of CPP |
| chr16 | 1498748 | A | A   | A   | Heterozygous CTC subset of CPP |
| chr16 | 1503879 | T | A,T | A,T | Heterozygous CTC subset of CPP |
| chr16 | 1524850 | A | A,G | A   | Heterozygous CTC subset of CPP |
| chr16 | 1545421 | T | T   | T   | Heterozygous CTC subset of CPP |
| chr16 | 1545448 | A | A,G | G   | Heterozygous CTC subset of CPP |
| chr16 | 1748906 | C | C,T | C   | Heterozygous CTC subset of CPP |
| chr16 | 1749252 | A | A   | A   | Heterozygous CTC subset of CPP |
| chr16 | 1749253 | A | A,G | A,G | Heterozygous CTC subset of CPP |
| chr16 | 1822665 | A | A   | A   | Heterozygous CTC subset of CPP |
| chr16 | 1822947 | C | C,G | C   | Heterozygous CTC subset of CPP |
| chr16 | 1827836 | T | C,T | C   | Heterozygous CTC subset of CPP |
| chr16 | 1827965 | A | A   | A   | Heterozygous CTC subset of CPP |
| chr16 | 1836796 | C | A,C | C   | Heterozygous CTC subset of CPP |
| chr16 | 1838640 | T | C,T | C   | Heterozygous CTC subset of CPP |
| chr16 | 1877558 | G | A,G | G   | Heterozygous CTC subset of CPP |
| chr16 | 2011649 | A | A   | A   | Heterozygous CTC subset of CPP |
| chr16 | 2011653 | A | A   | A   | Heterozygous CTC subset of CPP |
| chr16 | 2011659 | A | A   | A   | Heterozygous CTC subset of CPP |
| chr16 | 2012735 | A | A   | A   | Heterozygous CTC subset of CPP |
| chr16 | 2012738 | T | T   | T   | Heterozygous CTC subset of CPP |
| chr16 | 2012751 | T | T   | T   | Heterozygous CTC subset of CPP |
| chr16 | 2012760 | T | T   | T   | Heterozygous CTC subset of CPP |
| chr16 | 2013159 | G | G   | G   | Heterozygous CTC subset of CPP |
| chr16 | 2013257 | C | C   | C   | Heterozygous CTC subset of CPP |
| chr16 | 2014283 | A | A,G | A   | Heterozygous CTC subset of CPP |
| chr16 | 2014364 | C | C   | C   | Heterozygous CTC subset of CPP |
| chr16 | 2014366 | A | A   | A   | Heterozygous CTC subset of CPP |
| chr16 | 2014528 | G | A,G | G   | Heterozygous CTC subset of CPP |
| chr16 | 2014591 | C | C,T | C   | Heterozygous CTC subset of CPP |
| chr16 | 2025206 | A | A,C | A,C | Heterozygous CTC subset of CPP |
| chr16 | 2025604 | G | C,G | G   | Heterozygous CTC subset of CPP |
| chr16 | 2025678 | C | A,C | C   | Heterozygous CTC subset of CPP |
| chr16 | 2026064 | C | A,C | C   | Heterozygous CTC subset of CPP |
| chr16 | 2026825 | T | T   | T   | Heterozygous CTC subset of CPP |
| chr16 | 2034881 | A | A   | A   | Heterozygous CTC subset of CPP |
| chr16 | 2036048 | T | C,T | T   | Heterozygous CTC subset of CPP |
| chr16 | 2048796 | C | C,T | C   | Heterozygous CTC subset of CPP |
| chr16 | 2048826 | C | C,G | C,G | Heterozygous CTC subset of CPP |
| chr16 | 2049003 | A | A,T | A   | Heterozygous CTC subset of CPP |
| chr16 | 2049728 | C | C,T | C   | Heterozygous CTC subset of CPP |
| chr16 | 2049849 | T | C,T | T   | Heterozygous CTC subset of CPP |

Grillet et al., Supplementary Table 5

|       |          |   |        |        |                                |
|-------|----------|---|--------|--------|--------------------------------|
| chr16 | 2050192  | G | G,T    | G      | Heterozygous CTC subset of CPP |
| chr16 | 2050257  | G | G      | G      | Heterozygous CTC subset of CPP |
| chr16 | 2059622  | C | -C,C,G | -C,C,G | Heterozygous CTC subset of CPP |
| chr16 | 2089983  | T | T      | T      | Heterozygous CTC subset of CPP |
| chr16 | 2090024  | T | T      | T      | Heterozygous CTC subset of CPP |
| chr16 | 2138497  | T | T      | T      | Heterozygous CTC subset of CPP |
| chr16 | 2224049  | G | G      | G      | Heterozygous CTC subset of CPP |
| chr16 | 2257105  | C | C,G    | C,G    | Heterozygous CTC subset of CPP |
| chr16 | 2264766  | C | C,T    | C      | Heterozygous CTC subset of CPP |
| chr16 | 2282852  | A | A      | A      | Heterozygous CTC subset of CPP |
| chr16 | 2289970  | A | A      | A      | Heterozygous CTC subset of CPP |
| chr16 | 2289982  | A | A      | A      | Heterozygous CTC subset of CPP |
| chr16 | 2506964  | A | A      | A      | Heterozygous CTC subset of CPP |
| chr16 | 2569657  | C | C,T    | C      | Heterozygous CTC subset of CPP |
| chr16 | 2812939  | C | A,C    | C      | Heterozygous CTC subset of CPP |
| chr16 | 2813096  | C | C,G    | C      | Heterozygous CTC subset of CPP |
| chr16 | 2814135  | C | C,T    | C      | Heterozygous CTC subset of CPP |
| chr16 | 2821344  | A | A      | A      | Heterozygous CTC subset of CPP |
| chr16 | 2821380  | T | T      | T      | Heterozygous CTC subset of CPP |
| chr16 | 2821984  | G | A,G    | G      | Heterozygous CTC subset of CPP |
| chr16 | 3024257  | C | C      | C      | Heterozygous CTC subset of CPP |
| chr16 | 3073240  | G | G      | G      | Heterozygous CTC subset of CPP |
| chr16 | 3533577  | C | C,G    | C,G    | Heterozygous CTC subset of CPP |
| chr16 | 3721773  | G | C,G    | C,G    | Heterozygous CTC subset of CPP |
| chr16 | 3767473  | G | A,G    | G      | Heterozygous CTC subset of CPP |
| chr16 | 3820667  | C | C,T    | C      | Heterozygous CTC subset of CPP |
| chr16 | 3820736  | T | T      | T      | Heterozygous CTC subset of CPP |
| chr16 | 4310511  | A | A      | A      | Heterozygous CTC subset of CPP |
| chr16 | 4390358  | G | G,T    | G      | Heterozygous CTC subset of CPP |
| chr16 | 4476089  | T | C,T    | C      | Heterozygous CTC subset of CPP |
| chr16 | 4484396  | A | A,T    | T      | Heterozygous CTC subset of CPP |
| chr16 | 4487486  | G | A,G    | G      | Heterozygous CTC subset of CPP |
| chr16 | 4496973  | T | A,T    | A      | Heterozygous CTC subset of CPP |
| chr16 | 4519389  | T | A,T    | T      | Heterozygous CTC subset of CPP |
| chr16 | 4659850  | T | T      | T      | Heterozygous CTC subset of CPP |
| chr16 | 4723637  | A | A      | A      | Heterozygous CTC subset of CPP |
| chr16 | 4921263  | A | A      | A      | Heterozygous CTC subset of CPP |
| chr16 | 4926991  | T | T      | T      | Heterozygous CTC subset of CPP |
| chr16 | 5123160  | C | C      | C      | Heterozygous CTC subset of CPP |
| chr16 | 8953081  | C | C,G    | G      | Heterozygous CTC subset of CPP |
| chr16 | 10631912 | C | C,T    | C,T    | Heterozygous CTC subset of CPP |
| chr16 | 10637490 | C | C      | C      | Heterozygous CTC subset of CPP |
| chr16 | 10850624 | A | A      | A      | Heterozygous CTC subset of CPP |
| chr16 | 10850625 | C | C      | C      | Heterozygous CTC subset of CPP |
| chr16 | 11439496 | G | A,G    | G      | Heterozygous CTC subset of CPP |
| chr16 | 11444572 | A | A,C    | A      | Heterozygous CTC subset of CPP |

Grillet et al., Supplementary Table 5

|       |          |   |      |     |                                |
|-------|----------|---|------|-----|--------------------------------|
| chr16 | 11642109 | A | A    | A   | Heterozygous CTC subset of CPP |
| chr16 | 11642114 | A | A    | A   | Heterozygous CTC subset of CPP |
| chr16 | 11642242 | T | C,T  | C,T | Heterozygous CTC subset of CPP |
| chr16 | 11642444 | C | C    | C   | Heterozygous CTC subset of CPP |
| chr16 | 11642445 | T | -T,T | T   | Heterozygous CTC subset of CPP |
| chr16 | 11642667 | G | G    | G   | Heterozygous CTC subset of CPP |
| chr16 | 11642697 | A | A,G  | A   | Heterozygous CTC subset of CPP |
| chr16 | 11855842 | C | C    | C   | Heterozygous CTC subset of CPP |
| chr16 | 11940390 | T | C,T  | C,T | Heterozygous CTC subset of CPP |
| chr16 | 11969724 | G | C,G  | C   | Heterozygous CTC subset of CPP |
| chr16 | 11981487 | G | A,G  | G   | Heterozygous CTC subset of CPP |
| chr16 | 12009304 | C | A,C  | C   | Heterozygous CTC subset of CPP |
| chr16 | 14678237 | A | A    | A   | Heterozygous CTC subset of CPP |
| chr16 | 14758912 | T | T    | T   | Heterozygous CTC subset of CPP |
| chr16 | 15122812 | C | C    | C   | Heterozygous CTC subset of CPP |
| chr16 | 15128318 | T | T    | T   | Heterozygous CTC subset of CPP |
| chr16 | 15129940 | C | C,T  | C   | Heterozygous CTC subset of CPP |
| chr16 | 15129970 | A | A,G  | A,G | Heterozygous CTC subset of CPP |
| chr16 | 15165075 | T | T    | T   | Heterozygous CTC subset of CPP |
| chr16 | 16162122 | T | T    | T   | Heterozygous CTC subset of CPP |
| chr16 | 16184415 | A | A    | A   | Heterozygous CTC subset of CPP |
| chr16 | 16228242 | G | A,G  | G   | Heterozygous CTC subset of CPP |
| chr16 | 16228276 | T | T    | T   | Heterozygous CTC subset of CPP |
| chr16 | 18796066 | T | C,T  | C,T | Heterozygous CTC subset of CPP |
| chr16 | 18796067 | G | C,G  | C,G | Heterozygous CTC subset of CPP |
| chr16 | 18806886 | T | T    | T   | Heterozygous CTC subset of CPP |
| chr16 | 19725565 | A | A    | A   | Heterozygous CTC subset of CPP |
| chr16 | 19726275 | C | C,T  | C   | Heterozygous CTC subset of CPP |
| chr16 | 21994411 | G | A,G  | G   | Heterozygous CTC subset of CPP |
| chr16 | 23489821 | A | A    | A   | Heterozygous CTC subset of CPP |
| chr16 | 23546295 | T | T    | T   | Heterozygous CTC subset of CPP |
| chr16 | 23578334 | T | T    | T   | Heterozygous CTC subset of CPP |
| chr16 | 23701527 | G | G    | G   | Heterozygous CTC subset of CPP |
| chr16 | 24581098 | C | C    | C   | Heterozygous CTC subset of CPP |
| chr16 | 24581444 | G | G    | G   | Heterozygous CTC subset of CPP |
| chr16 | 24583715 | A | A,G  | A   | Heterozygous CTC subset of CPP |
| chr16 | 27238110 | C | C,T  | C   | Heterozygous CTC subset of CPP |
| chr16 | 27246617 | T | C,T  | C,T | Heterozygous CTC subset of CPP |
| chr16 | 27476708 | A | A    | A   | Heterozygous CTC subset of CPP |
| chr16 | 27489844 | A | A    | A   | Heterozygous CTC subset of CPP |
| chr16 | 27495663 | T | T    | T   | Heterozygous CTC subset of CPP |
| chr16 | 27497454 | C | C    | C   | Heterozygous CTC subset of CPP |
| chr16 | 27501014 | T | T    | T   | Heterozygous CTC subset of CPP |
| chr16 | 27504540 | C | C    | C   | Heterozygous CTC subset of CPP |
| chr16 | 27518240 | A | A    | A   | Heterozygous CTC subset of CPP |
| chr16 | 27519913 | T | T    | T   | Heterozygous CTC subset of CPP |

Grillet et al., Supplementary Table 5

|       |          |   |        |        |                                |
|-------|----------|---|--------|--------|--------------------------------|
| chr16 | 28123226 | G | A,G    | G      | Heterozygous CTC subset of CPP |
| chr16 | 28167413 | A | A      | A      | Heterozygous CTC subset of CPP |
| chr16 | 28840813 | C | C      | C      | Heterozygous CTC subset of CPP |
| chr16 | 28855549 | A | +G,A,T | +G,A,T | Heterozygous CTC subset of CPP |
| chr16 | 28883241 | A | A,G    | A,G    | Heterozygous CTC subset of CPP |
| chr16 | 28884910 | A | A      | A      | Heterozygous CTC subset of CPP |
| chr16 | 28884913 | G | G      | G      | Heterozygous CTC subset of CPP |
| chr16 | 28975157 | T | T      | T      | Heterozygous CTC subset of CPP |
| chr16 | 28986878 | G | G      | G      | Heterozygous CTC subset of CPP |
| chr16 | 28995140 | T | T      | T      | Heterozygous CTC subset of CPP |
| chr16 | 28995241 | T | T      | T      | Heterozygous CTC subset of CPP |
| chr16 | 29706444 | C | C,T    | C      | Heterozygous CTC subset of CPP |
| chr16 | 29814136 | C | A,C    | C      | Heterozygous CTC subset of CPP |
| chr16 | 29822458 | A | A      | A      | Heterozygous CTC subset of CPP |
| chr16 | 29822465 | T | T      | T      | Heterozygous CTC subset of CPP |
| chr16 | 29827914 | A | A      | A      | Heterozygous CTC subset of CPP |
| chr16 | 29994398 | C | C      | C      | Heterozygous CTC subset of CPP |
| chr16 | 30005648 | T | T      | T      | Heterozygous CTC subset of CPP |
| chr16 | 30007664 | C | C      | C      | Heterozygous CTC subset of CPP |
| chr16 | 30012274 | C | C,T    | C      | Heterozygous CTC subset of CPP |
| chr16 | 30016636 | T | T      | T      | Heterozygous CTC subset of CPP |
| chr16 | 30016640 | A | A      | A      | Heterozygous CTC subset of CPP |
| chr16 | 30016653 | C | -C,C   | C      | Heterozygous CTC subset of CPP |
| chr16 | 30016820 | A | A,C    | A      | Heterozygous CTC subset of CPP |
| chr16 | 30079964 | C | +A,C   | +A,C   | Heterozygous CTC subset of CPP |
| chr16 | 30080299 | G | +A,G   | +A,G   | Heterozygous CTC subset of CPP |
| chr16 | 30380883 | G | G      | G      | Heterozygous CTC subset of CPP |
| chr16 | 30536672 | A | A,G    | A,G    | Heterozygous CTC subset of CPP |
| chr16 | 30536723 | A | A      | A      | Heterozygous CTC subset of CPP |
| chr16 | 30536918 | C | C,G    | C,G    | Heterozygous CTC subset of CPP |
| chr16 | 30723432 | C | C      | C      | Heterozygous CTC subset of CPP |
| chr16 | 30723644 | T | T      | T      | Heterozygous CTC subset of CPP |
| chr16 | 30723653 | T | T      | T      | Heterozygous CTC subset of CPP |
| chr16 | 30744624 | C | C      | C      | Heterozygous CTC subset of CPP |
| chr16 | 30745260 | A | A      | A      | Heterozygous CTC subset of CPP |
| chr16 | 30750310 | T | T      | T      | Heterozygous CTC subset of CPP |
| chr16 | 30774597 | C | C,T    | C      | Heterozygous CTC subset of CPP |
| chr16 | 30978322 | A | A      | A      | Heterozygous CTC subset of CPP |
| chr16 | 30980947 | G | G      | G      | Heterozygous CTC subset of CPP |
| chr16 | 30980952 | A | A      | A      | Heterozygous CTC subset of CPP |
| chr16 | 31049962 | G | G      | G      | Heterozygous CTC subset of CPP |
| chr16 | 31193942 | C | A,C    | C      | Heterozygous CTC subset of CPP |
| chr16 | 31195687 | A | A      | A      | Heterozygous CTC subset of CPP |
| chr16 | 31202800 | G | A,G    | G      | Heterozygous CTC subset of CPP |
| chr16 | 31501680 | T | T      | T      | Heterozygous CTC subset of CPP |
| chr16 | 31502223 | T | T      | T      | Heterozygous CTC subset of CPP |

Grillet et al., Supplementary Table 5

|       |          |   |      |      |                                |
|-------|----------|---|------|------|--------------------------------|
| chr16 | 33961286 | T | +C,T | T    | Heterozygous CTC subset of CPP |
| chr16 | 33961324 | G | +C,G | +C,G | Heterozygous CTC subset of CPP |
| chr16 | 33961327 | G | C,G  | C,G  | Heterozygous CTC subset of CPP |
| chr16 | 46731639 | T | T    | T    | Heterozygous CTC subset of CPP |
| chr16 | 46731743 | G | G    | G    | Heterozygous CTC subset of CPP |
| chr16 | 46918806 | T | T    | T    | Heterozygous CTC subset of CPP |
| chr16 | 46952606 | C | C    | C    | Heterozygous CTC subset of CPP |
| chr16 | 46958330 | C | C    | C    | Heterozygous CTC subset of CPP |
| chr16 | 48311366 | T | T    | T    | Heterozygous CTC subset of CPP |
| chr16 | 48330012 | T | T    | T    | Heterozygous CTC subset of CPP |
| chr16 | 48385665 | T | T    | T    | Heterozygous CTC subset of CPP |
| chr16 | 48581996 | C | C    | C    | Heterozygous CTC subset of CPP |
| chr16 | 50134149 | T | T    | T    | Heterozygous CTC subset of CPP |
| chr16 | 53514590 | A | A    | A    | Heterozygous CTC subset of CPP |
| chr16 | 56396555 | A | A    | A    | Heterozygous CTC subset of CPP |
| chr16 | 56487256 | T | T    | T    | Heterozygous CTC subset of CPP |
| chr16 | 56492496 | T | T    | T    | Heterozygous CTC subset of CPP |
| chr16 | 56504564 | A | A    | A    | Heterozygous CTC subset of CPP |
| chr16 | 56510072 | A | A,C  | A    | Heterozygous CTC subset of CPP |
| chr16 | 56540135 | A | A    | A    | Heterozygous CTC subset of CPP |
| chr16 | 56782226 | A | A    | A    | Heterozygous CTC subset of CPP |
| chr16 | 56864539 | C | C,T  | C    | Heterozygous CTC subset of CPP |
| chr16 | 56966071 | T | G,T  | G,T  | Heterozygous CTC subset of CPP |
| chr16 | 56969148 | G | G    | G    | Heterozygous CTC subset of CPP |
| chr16 | 57468022 | G | G    | G    | Heterozygous CTC subset of CPP |
| chr16 | 57494547 | T | T    | T    | Heterozygous CTC subset of CPP |
| chr16 | 57695745 | T | T    | T    | Heterozygous CTC subset of CPP |
| chr16 | 57787008 | A | A    | A    | Heterozygous CTC subset of CPP |
| chr16 | 57787178 | A | +G,A | A    | Heterozygous CTC subset of CPP |
| chr16 | 58564198 | A | A    | A    | Heterozygous CTC subset of CPP |
| chr16 | 58575489 | G | A,G  | G    | Heterozygous CTC subset of CPP |
| chr16 | 58579274 | C | C,T  | C,T  | Heterozygous CTC subset of CPP |
| chr16 | 58587737 | C | C,T  | C    | Heterozygous CTC subset of CPP |
| chr16 | 58743454 | A | A,C  | C    | Heterozygous CTC subset of CPP |
| chr16 | 58750604 | G | A,G  | A    | Heterozygous CTC subset of CPP |
| chr16 | 58757668 | A | A,C  | C    | Heterozygous CTC subset of CPP |
| chr16 | 58757683 | A | A,G  | G    | Heterozygous CTC subset of CPP |
| chr16 | 66836904 | T | T    | T    | Heterozygous CTC subset of CPP |
| chr16 | 66857177 | T | T    | T    | Heterozygous CTC subset of CPP |
| chr16 | 66857179 | A | A    | A    | Heterozygous CTC subset of CPP |
| chr16 | 67262770 | T | T    | T    | Heterozygous CTC subset of CPP |
| chr16 | 67645018 | A | A    | A    | Heterozygous CTC subset of CPP |
| chr16 | 67645338 | C | C    | C    | Heterozygous CTC subset of CPP |
| chr16 | 67671598 | T | T    | T    | Heterozygous CTC subset of CPP |
| chr16 | 67692543 | G | G    | G    | Heterozygous CTC subset of CPP |
| chr16 | 67692700 | A | A    | A    | Heterozygous CTC subset of CPP |



Grillet et al., Supplementary Table 5

|       |          |   |     |     |                                |
|-------|----------|---|-----|-----|--------------------------------|
| chr16 | 67866007 | T | T   | T   | Heterozygous CTC subset of CPP |
| chr16 | 67909850 | C | C   | C   | Heterozygous CTC subset of CPP |
| chr16 | 67909851 | C | C   | C   | Heterozygous CTC subset of CPP |
| chr16 | 67911294 | T | T   | T   | Heterozygous CTC subset of CPP |
| chr16 | 67917520 | T | T   | T   | Heterozygous CTC subset of CPP |
| chr16 | 67968470 | A | A   | A   | Heterozygous CTC subset of CPP |
| chr16 | 68267721 | T | T   | T   | Heterozygous CTC subset of CPP |
| chr16 | 68308751 | T | T   | T   | Heterozygous CTC subset of CPP |
| chr16 | 69354963 | A | A,G | A,G | Heterozygous CTC subset of CPP |
| chr16 | 69364443 | A | A,G | A,G | Heterozygous CTC subset of CPP |
| chr16 | 69373414 | T | C,T | C,T | Heterozygous CTC subset of CPP |
| chr16 | 69373995 | G | G   | G   | Heterozygous CTC subset of CPP |
| chr16 | 69419302 | T | T   | T   | Heterozygous CTC subset of CPP |
| chr16 | 69752373 | C | C,T | C   | Heterozygous CTC subset of CPP |
| chr16 | 69778786 | C | C   | C   | Heterozygous CTC subset of CPP |
| chr16 | 69782855 | C | C,T | C,T | Heterozygous CTC subset of CPP |
| chr16 | 69973825 | G | G   | G   | Heterozygous CTC subset of CPP |
| chr16 | 70303580 | G | A,G | A   | Heterozygous CTC subset of CPP |
| chr16 | 70514898 | T | T   | T   | Heterozygous CTC subset of CPP |
| chr16 | 70515355 | C | C,T | T   | Heterozygous CTC subset of CPP |
| chr16 | 70530185 | G | A,G | G   | Heterozygous CTC subset of CPP |
| chr16 | 70531901 | T | T   | T   | Heterozygous CTC subset of CPP |
| chr16 | 70569215 | A | A,T | A   | Heterozygous CTC subset of CPP |
| chr16 | 70602221 | C | C,T | C   | Heterozygous CTC subset of CPP |
| chr16 | 70606037 | A | A   | A   | Heterozygous CTC subset of CPP |
| chr16 | 70697772 | A | A   | A   | Heterozygous CTC subset of CPP |
| chr16 | 70710858 | C | C,T | C   | Heterozygous CTC subset of CPP |
| chr16 | 70712310 | T | T   | T   | Heterozygous CTC subset of CPP |
| chr16 | 70834725 | T | T   | T   | Heterozygous CTC subset of CPP |
| chr16 | 71773190 | G | G,T | G,T | Heterozygous CTC subset of CPP |
| chr16 | 71782270 | A | A   | A   | Heterozygous CTC subset of CPP |
| chr16 | 71787771 | A | A   | A   | Heterozygous CTC subset of CPP |
| chr16 | 71823230 | T | T   | T   | Heterozygous CTC subset of CPP |
| chr16 | 71950450 | C | C,T | C,T | Heterozygous CTC subset of CPP |
| chr16 | 71956517 | C | C   | C   | Heterozygous CTC subset of CPP |
| chr16 | 71957271 | A | A   | A   | Heterozygous CTC subset of CPP |
| chr16 | 72055097 | G | G   | G   | Heterozygous CTC subset of CPP |
| chr16 | 72130810 | A | A   | A   | Heterozygous CTC subset of CPP |
| chr16 | 72130815 | C | A,C | C   | Heterozygous CTC subset of CPP |
| chr16 | 72137053 | A | A   | A   | Heterozygous CTC subset of CPP |
| chr16 | 72137561 | G | A,G | G   | Heterozygous CTC subset of CPP |
| chr16 | 72138931 | A | A   | A   | Heterozygous CTC subset of CPP |
| chr16 | 72139184 | C | A,C | C   | Heterozygous CTC subset of CPP |
| chr16 | 74499589 | G | A,G | A,G | Heterozygous CTC subset of CPP |
| chr16 | 74503897 | T | T   | T   | Heterozygous CTC subset of CPP |
| chr16 | 74537527 | T | T   | T   | Heterozygous CTC subset of CPP |

Grillet et al., Supplementary Table 5

|       |          |   |     |     |                                |
|-------|----------|---|-----|-----|--------------------------------|
| chr16 | 75018874 | G | G   | G   | Heterozygous CTC subset of CPP |
| chr16 | 75263473 | A | A   | A   | Heterozygous CTC subset of CPP |
| chr16 | 75263601 | G | A,G | G   | Heterozygous CTC subset of CPP |
| chr16 | 75263816 | G | A,G | G   | Heterozygous CTC subset of CPP |
| chr16 | 75269267 | A | A,G | G   | Heterozygous CTC subset of CPP |
| chr16 | 75276775 | G | A,G | A,G | Heterozygous CTC subset of CPP |
| chr16 | 77227594 | T | T   | T   | Heterozygous CTC subset of CPP |
| chr16 | 81030928 | A | A   | A   | Heterozygous CTC subset of CPP |
| chr16 | 81697884 | A | A   | A   | Heterozygous CTC subset of CPP |
| chr16 | 81730166 | T | T   | T   | Heterozygous CTC subset of CPP |
| chr16 | 81733322 | C | C   | C   | Heterozygous CTC subset of CPP |
| chr16 | 81737547 | G | A,G | G   | Heterozygous CTC subset of CPP |
| chr16 | 82182354 | G | A,G | A,G | Heterozygous CTC subset of CPP |
| chr16 | 82203742 | T | C,T | C,T | Heterozygous CTC subset of CPP |
| chr16 | 82203758 | C | C,T | C,T | Heterozygous CTC subset of CPP |
| chr16 | 82203768 | G | G,T | G   | Heterozygous CTC subset of CPP |
| chr16 | 84115483 | G | A,G | A,G | Heterozygous CTC subset of CPP |
| chr16 | 84213114 | C | C,T | C,T | Heterozygous CTC subset of CPP |
| chr16 | 84778239 | G | G   | G   | Heterozygous CTC subset of CPP |
| chr16 | 84778690 | C | C   | C   | Heterozygous CTC subset of CPP |
| chr16 | 84778694 | T | T   | T   | Heterozygous CTC subset of CPP |
| chr16 | 84778697 | G | G   | G   | Heterozygous CTC subset of CPP |
| chr16 | 84778762 | C | C,T | C   | Heterozygous CTC subset of CPP |
| chr16 | 84778892 | G | G   | G   | Heterozygous CTC subset of CPP |
| chr16 | 84779248 | T | G,T | T   | Heterozygous CTC subset of CPP |
| chr16 | 84792322 | A | A   | A   | Heterozygous CTC subset of CPP |
| chr16 | 85009970 | A | A,G | A   | Heterozygous CTC subset of CPP |
| chr16 | 85682356 | A | A   | A   | Heterozygous CTC subset of CPP |
| chr16 | 85706047 | A | A,C | C   | Heterozygous CTC subset of CPP |
| chr16 | 85712217 | A | A   | A   | Heterozygous CTC subset of CPP |
| chr16 | 85838709 | G | G   | G   | Heterozygous CTC subset of CPP |
| chr16 | 87425962 | A | A,C | A   | Heterozygous CTC subset of CPP |
| chr16 | 88709712 | A | A,G | G   | Heterozygous CTC subset of CPP |
| chr16 | 88709737 | C | C,T | T   | Heterozygous CTC subset of CPP |
| chr16 | 88709828 | A | A,G | G   | Heterozygous CTC subset of CPP |
| chr16 | 88779739 | A | A,G | A,G | Heterozygous CTC subset of CPP |
| chr16 | 88783100 | T | C,T | C,T | Heterozygous CTC subset of CPP |
| chr16 | 88783449 | C | C,G | C,G | Heterozygous CTC subset of CPP |
| chr16 | 88787606 | T | T   | T   | Heterozygous CTC subset of CPP |
| chr16 | 88787612 | T | T   | T   | Heterozygous CTC subset of CPP |
| chr16 | 88787673 | G | A,G | A,G | Heterozygous CTC subset of CPP |
| chr16 | 88800785 | C | C,T | C   | Heterozygous CTC subset of CPP |
| chr16 | 88800913 | C | C,T | C   | Heterozygous CTC subset of CPP |
| chr16 | 88802573 | G | A,G | G   | Heterozygous CTC subset of CPP |
| chr16 | 88803982 | C | C,G | C,G | Heterozygous CTC subset of CPP |
| chr16 | 88872511 | T | C,T | C   | Heterozygous CTC subset of CPP |

Grillet et al., Supplementary Table 5

|       |          |   |      |      |                                |
|-------|----------|---|------|------|--------------------------------|
| chr16 | 88926089 | C | C,T  | C    | Heterozygous CTC subset of CPP |
| chr16 | 89347675 | A | A    | A    | Heterozygous CTC subset of CPP |
| chr16 | 89349290 | C | C,T  | C    | Heterozygous CTC subset of CPP |
| chr16 | 89351595 | T | T    | T    | Heterozygous CTC subset of CPP |
| chr16 | 89628142 | A | A    | A    | Heterozygous CTC subset of CPP |
| chr16 | 89757882 | G | A,G  | G    | Heterozygous CTC subset of CPP |
| chr16 | 89761477 | A | A    | A    | Heterozygous CTC subset of CPP |
| chr16 | 89784006 | T | T    | T    | Heterozygous CTC subset of CPP |
| chr16 | 89804577 | G | A,G  | G    | Heterozygous CTC subset of CPP |
| chr16 | 89883007 | A | A,T  | A,T  | Heterozygous CTC subset of CPP |
| chr16 | 89951019 | G | G    | G    | Heterozygous CTC subset of CPP |
| chr16 | 90025601 | A | A    | A    | Heterozygous CTC subset of CPP |
| chr17 | 648142   | C | C    | C    | Heterozygous CTC subset of CPP |
| chr17 | 648157   | G | A,G  | G    | Heterozygous CTC subset of CPP |
| chr17 | 648186   | G | A,G  | G    | Heterozygous CTC subset of CPP |
| chr17 | 649505   | T | T    | T    | Heterozygous CTC subset of CPP |
| chr17 | 649547   | G | C,G  | G    | Heterozygous CTC subset of CPP |
| chr17 | 649935   | G | C,G  | G    | Heterozygous CTC subset of CPP |
| chr17 | 673718   | A | A    | A    | Heterozygous CTC subset of CPP |
| chr17 | 708333   | C | C    | C    | Heterozygous CTC subset of CPP |
| chr17 | 882737   | C | C    | C    | Heterozygous CTC subset of CPP |
| chr17 | 910447   | G | G    | G    | Heterozygous CTC subset of CPP |
| chr17 | 962020   | T | T    | T    | Heterozygous CTC subset of CPP |
| chr17 | 970481   | T | +C,T | T    | Heterozygous CTC subset of CPP |
| chr17 | 1370542  | C | A,C  | C    | Heterozygous CTC subset of CPP |
| chr17 | 1377943  | A | A,G  | A    | Heterozygous CTC subset of CPP |
| chr17 | 1378314  | A | A    | A    | Heterozygous CTC subset of CPP |
| chr17 | 1554249  | A | A    | A    | Heterozygous CTC subset of CPP |
| chr17 | 1558644  | T | T    | T    | Heterozygous CTC subset of CPP |
| chr17 | 1564318  | T | T    | T    | Heterozygous CTC subset of CPP |
| chr17 | 1733399  | A | A,G  | G    | Heterozygous CTC subset of CPP |
| chr17 | 1782957  | C | C,T  | C    | Heterozygous CTC subset of CPP |
| chr17 | 1795180  | T | C,T  | T    | Heterozygous CTC subset of CPP |
| chr17 | 2236404  | T | C,T  | T    | Heterozygous CTC subset of CPP |
| chr17 | 2238675  | A | A,G  | A    | Heterozygous CTC subset of CPP |
| chr17 | 2585113  | C | C,T  | T    | Heterozygous CTC subset of CPP |
| chr17 | 2595964  | G | A,G  | G    | Heterozygous CTC subset of CPP |
| chr17 | 2597332  | G | +C,G | +C,G | Heterozygous CTC subset of CPP |
| chr17 | 2606715  | G | A,G  | A    | Heterozygous CTC subset of CPP |
| chr17 | 2911430  | G | G    | G    | Heterozygous CTC subset of CPP |
| chr17 | 3568012  | A | A,G  | G    | Heterozygous CTC subset of CPP |
| chr17 | 3572551  | G | G    | G    | Heterozygous CTC subset of CPP |
| chr17 | 4458515  | G | G,T  | G    | Heterozygous CTC subset of CPP |
| chr17 | 4458598  | G | C,G  | G    | Heterozygous CTC subset of CPP |
| chr17 | 4575436  | A | A    | A    | Heterozygous CTC subset of CPP |
| chr17 | 4575439  | C | A,C  | C    | Heterozygous CTC subset of CPP |

Grillet et al., Supplementary Table 5

|       |         |   |        |      |                                |
|-------|---------|---|--------|------|--------------------------------|
| chr17 | 4575442 | C | C,T    | C    | Heterozygous CTC subset of CPP |
| chr17 | 4576750 | C | C      | C    | Heterozygous CTC subset of CPP |
| chr17 | 4576751 | T | T      | T    | Heterozygous CTC subset of CPP |
| chr17 | 4579780 | C | C      | C    | Heterozygous CTC subset of CPP |
| chr17 | 4585810 | C | C,T    | C    | Heterozygous CTC subset of CPP |
| chr17 | 4622638 | C | C,T    | C    | Heterozygous CTC subset of CPP |
| chr17 | 4622715 | T | +C,T   | +C,T | Heterozygous CTC subset of CPP |
| chr17 | 4642151 | G | G      | G    | Heterozygous CTC subset of CPP |
| chr17 | 4736838 | G | G      | G    | Heterozygous CTC subset of CPP |
| chr17 | 4790958 | C | C      | C    | Heterozygous CTC subset of CPP |
| chr17 | 4793052 | C | C      | C    | Heterozygous CTC subset of CPP |
| chr17 | 4842269 | G | G      | G    | Heterozygous CTC subset of CPP |
| chr17 | 4904560 | A | A      | A    | Heterozygous CTC subset of CPP |
| chr17 | 4904564 | T | C,T    | T    | Heterozygous CTC subset of CPP |
| chr17 | 4910337 | G | A,G    | G    | Heterozygous CTC subset of CPP |
| chr17 | 4926882 | A | A,G    | G    | Heterozygous CTC subset of CPP |
| chr17 | 5264584 | T | T      | T    | Heterozygous CTC subset of CPP |
| chr17 | 5284719 | T | C,T    | T    | Heterozygous CTC subset of CPP |
| chr17 | 5294976 | T | A,T    | T    | Heterozygous CTC subset of CPP |
| chr17 | 5308396 | T | T      | T    | Heterozygous CTC subset of CPP |
| chr17 | 5336615 | A | A      | A    | Heterozygous CTC subset of CPP |
| chr17 | 5353725 | G | G      | G    | Heterozygous CTC subset of CPP |
| chr17 | 5354196 | A | A      | A    | Heterozygous CTC subset of CPP |
| chr17 | 5383793 | A | A      | A    | Heterozygous CTC subset of CPP |
| chr17 | 6348618 | T | T      | T    | Heterozygous CTC subset of CPP |
| chr17 | 6546284 | T | T      | T    | Heterozygous CTC subset of CPP |
| chr17 | 6546285 | A | A      | A    | Heterozygous CTC subset of CPP |
| chr17 | 6919942 | C | C,T    | C    | Heterozygous CTC subset of CPP |
| chr17 | 7123240 | T | C,T    | T    | Heterozygous CTC subset of CPP |
| chr17 | 7132290 | A | A      | A    | Heterozygous CTC subset of CPP |
| chr17 | 7134078 | A | A      | A    | Heterozygous CTC subset of CPP |
| chr17 | 7149435 | T | T      | T    | Heterozygous CTC subset of CPP |
| chr17 | 7156149 | G | G      | G    | Heterozygous CTC subset of CPP |
| chr17 | 7214772 | A | A,G    | A    | Heterozygous CTC subset of CPP |
| chr17 | 7297452 | A | A,G    | G    | Heterozygous CTC subset of CPP |
| chr17 | 7401457 | A | A      | A    | Heterozygous CTC subset of CPP |
| chr17 | 7415909 | G | G      | G    | Heterozygous CTC subset of CPP |
| chr17 | 7466408 | A | A,G    | A    | Heterozygous CTC subset of CPP |
| chr17 | 7470286 | A | -A,A,C | -A,A | Heterozygous CTC subset of CPP |
| chr17 | 7470288 | A | A,G    | A,G  | Heterozygous CTC subset of CPP |
| chr17 | 7478435 | A | +G,A   | +G,A | Heterozygous CTC subset of CPP |
| chr17 | 7478570 | T | T      | T    | Heterozygous CTC subset of CPP |
| chr17 | 7480379 | A | A      | A    | Heterozygous CTC subset of CPP |
| chr17 | 7481140 | T | G,T    | G,T  | Heterozygous CTC subset of CPP |
| chr17 | 7481143 | A | +T,A   | +T,A | Heterozygous CTC subset of CPP |
| chr17 | 7481227 | A | A      | A    | Heterozygous CTC subset of CPP |

Grillet et al., Supplementary Table 5

|       |          |   |      |      |                                |
|-------|----------|---|------|------|--------------------------------|
| chr17 | 7491177  | G | G,T  | G    | Heterozygous CTC subset of CPP |
| chr17 | 7496382  | C | C,T  | C    | Heterozygous CTC subset of CPP |
| chr17 | 7576921  | G | A,G  | G    | Heterozygous CTC subset of CPP |
| chr17 | 7577098  | T | A,T  | T    | Heterozygous CTC subset of CPP |
| chr17 | 7577120  | C | C,T  | T    | Heterozygous CTC subset of CPP |
| chr17 | 7579472  | G | C,G  | G    | Heterozygous CTC subset of CPP |
| chr17 | 7752610  | A | A    | A    | Heterozygous CTC subset of CPP |
| chr17 | 7756405  | T | T    | T    | Heterozygous CTC subset of CPP |
| chr17 | 7794020  | A | A    | A    | Heterozygous CTC subset of CPP |
| chr17 | 7796689  | A | A    | A    | Heterozygous CTC subset of CPP |
| chr17 | 7798269  | A | A    | A    | Heterozygous CTC subset of CPP |
| chr17 | 7807779  | A | A    | A    | Heterozygous CTC subset of CPP |
| chr17 | 8108339  | G | A,G  | G    | Heterozygous CTC subset of CPP |
| chr17 | 8110618  | A | A    | A    | Heterozygous CTC subset of CPP |
| chr17 | 8283205  | A | A    | A    | Heterozygous CTC subset of CPP |
| chr17 | 12899963 | T | C,T  | T    | Heterozygous CTC subset of CPP |
| chr17 | 12906867 | G | G    | G    | Heterozygous CTC subset of CPP |
| chr17 | 12915009 | G | A,G  | G    | Heterozygous CTC subset of CPP |
| chr17 | 15942764 | T | T    | T    | Heterozygous CTC subset of CPP |
| chr17 | 15942783 | T | T    | T    | Heterozygous CTC subset of CPP |
| chr17 | 15974888 | T | T    | T    | Heterozygous CTC subset of CPP |
| chr17 | 16049808 | C | C    | C    | Heterozygous CTC subset of CPP |
| chr17 | 16052816 | C | C    | C    | Heterozygous CTC subset of CPP |
| chr17 | 16256686 | G | G    | G    | Heterozygous CTC subset of CPP |
| chr17 | 16342634 | G | A,G  | A,G  | Heterozygous CTC subset of CPP |
| chr17 | 16342638 | T | -T,T | -T,T | Heterozygous CTC subset of CPP |
| chr17 | 16342838 | A | A,C  | A,C  | Heterozygous CTC subset of CPP |
| chr17 | 16342840 | A | A,G  | A,G  | Heterozygous CTC subset of CPP |
| chr17 | 17046024 | C | A,C  | A    | Heterozygous CTC subset of CPP |
| chr17 | 17062241 | C | C,G  | G    | Heterozygous CTC subset of CPP |
| chr17 | 17168164 | G | A,G  | A    | Heterozygous CTC subset of CPP |
| chr17 | 17720681 | A | A    | A    | Heterozygous CTC subset of CPP |
| chr17 | 17740165 | C | -C   | -C   | Heterozygous CTC subset of CPP |
| chr17 | 18003886 | A | A    | A    | Heterozygous CTC subset of CPP |
| chr17 | 18111868 | G | A,G  | A    | Heterozygous CTC subset of CPP |
| chr17 | 18156691 | T | T    | T    | Heterozygous CTC subset of CPP |
| chr17 | 18156979 | A | A    | A    | Heterozygous CTC subset of CPP |
| chr17 | 18157853 | A | A    | A    | Heterozygous CTC subset of CPP |
| chr17 | 18232201 | T | T    | T    | Heterozygous CTC subset of CPP |
| chr17 | 18232233 | C | C    | C    | Heterozygous CTC subset of CPP |
| chr17 | 18882916 | A | A    | A    | Heterozygous CTC subset of CPP |
| chr17 | 19559773 | T | T    | T    | Heterozygous CTC subset of CPP |
| chr17 | 19578873 | A | A,T  | T    | Heterozygous CTC subset of CPP |
| chr17 | 20911204 | G | G,T  | G    | Heterozygous CTC subset of CPP |
| chr17 | 21204266 | T | T    | T    | Heterozygous CTC subset of CPP |
| chr17 | 25621461 | G | G    | G    | Heterozygous CTC subset of CPP |

Grillet et al., Supplementary Table 5

|       |          |   |        |        |                                |
|-------|----------|---|--------|--------|--------------------------------|
| chr17 | 25628820 | T | C,T    | T      | Heterozygous CTC subset of CPP |
| chr17 | 25636126 | G | G      | G      | Heterozygous CTC subset of CPP |
| chr17 | 25636127 | T | T      | T      | Heterozygous CTC subset of CPP |
| chr17 | 26653806 | G | G      | G      | Heterozygous CTC subset of CPP |
| chr17 | 26655633 | C | C      | C      | Heterozygous CTC subset of CPP |
| chr17 | 26669416 | C | C      | C      | Heterozygous CTC subset of CPP |
| chr17 | 26676135 | C | C,T    | C      | Heterozygous CTC subset of CPP |
| chr17 | 26676187 | T | +C,T   | +C,T   | Heterozygous CTC subset of CPP |
| chr17 | 26684390 | G | +C,G   | +C,G   | Heterozygous CTC subset of CPP |
| chr17 | 26684392 | T | C,T    | C,T    | Heterozygous CTC subset of CPP |
| chr17 | 26684394 | T | +G,G,T | +G,G,T | Heterozygous CTC subset of CPP |
| chr17 | 26687594 | G | G      | G      | Heterozygous CTC subset of CPP |
| chr17 | 26874314 | G | G      | G      | Heterozygous CTC subset of CPP |
| chr17 | 26885594 | T | T      | T      | Heterozygous CTC subset of CPP |
| chr17 | 26905770 | T | T      | T      | Heterozygous CTC subset of CPP |
| chr17 | 27002447 | T | T      | T      | Heterozygous CTC subset of CPP |
| chr17 | 27009749 | C | C,T    | C      | Heterozygous CTC subset of CPP |
| chr17 | 27052356 | C | C      | C      | Heterozygous CTC subset of CPP |
| chr17 | 27071273 | G | G      | G      | Heterozygous CTC subset of CPP |
| chr17 | 27075423 | C | C,T    | C,T    | Heterozygous CTC subset of CPP |
| chr17 | 27185827 | C | C,T    | C,T    | Heterozygous CTC subset of CPP |
| chr17 | 27207571 | C | C,T    | C,T    | Heterozygous CTC subset of CPP |
| chr17 | 27208832 | T | T      | T      | Heterozygous CTC subset of CPP |
| chr17 | 27419931 | A | A      | A      | Heterozygous CTC subset of CPP |
| chr17 | 27613677 | G | A,G    | A,G    | Heterozygous CTC subset of CPP |
| chr17 | 27899713 | C | C      | C      | Heterozygous CTC subset of CPP |
| chr17 | 28511978 | G | A,G    | A,G    | Heterozygous CTC subset of CPP |
| chr17 | 28612448 | G | C,G    | C,G    | Heterozygous CTC subset of CPP |
| chr17 | 29849394 | T | T      | T      | Heterozygous CTC subset of CPP |
| chr17 | 30221701 | A | A      | A      | Heterozygous CTC subset of CPP |
| chr17 | 30666860 | G | G      | G      | Heterozygous CTC subset of CPP |
| chr17 | 30696666 | C | A,C    | C      | Heterozygous CTC subset of CPP |
| chr17 | 30821923 | G | G      | G      | Heterozygous CTC subset of CPP |
| chr17 | 33289405 | T | T      | T      | Heterozygous CTC subset of CPP |
| chr17 | 33289695 | A | A      | A      | Heterozygous CTC subset of CPP |
| chr17 | 33321371 | G | G,T    | G      | Heterozygous CTC subset of CPP |
| chr17 | 33331507 | A | A      | A      | Heterozygous CTC subset of CPP |
| chr17 | 33464864 | C | C,T    | C,T    | Heterozygous CTC subset of CPP |
| chr17 | 33478216 | T | C,T    | C      | Heterozygous CTC subset of CPP |
| chr17 | 33932823 | A | A      | A      | Heterozygous CTC subset of CPP |
| chr17 | 33977683 | A | A,G    | A      | Heterozygous CTC subset of CPP |
| chr17 | 33998802 | G | C,G    | G      | Heterozygous CTC subset of CPP |
| chr17 | 34165444 | G | A,G    | G      | Heterozygous CTC subset of CPP |
| chr17 | 34171827 | C | C,T    | C      | Heterozygous CTC subset of CPP |
| chr17 | 34883925 | T | A,T    | T      | Heterozygous CTC subset of CPP |
| chr17 | 34893306 | T | T      | T      | Heterozygous CTC subset of CPP |

Grillet et al., Supplementary Table 5

|       |          |   |       |       |                                |
|-------|----------|---|-------|-------|--------------------------------|
| chr17 | 34910699 | T | T     | T     | Heterozygous CTC subset of CPP |
| chr17 | 34916614 | T | T     | T     | Heterozygous CTC subset of CPP |
| chr17 | 34941786 | T | T     | T     | Heterozygous CTC subset of CPP |
| chr17 | 34941862 | T | T     | T     | Heterozygous CTC subset of CPP |
| chr17 | 35346641 | T | T     | T     | Heterozygous CTC subset of CPP |
| chr17 | 35981247 | T | T     | T     | Heterozygous CTC subset of CPP |
| chr17 | 35984410 | T | C,T   | C     | Heterozygous CTC subset of CPP |
| chr17 | 35988672 | C | C,T   | T     | Heterozygous CTC subset of CPP |
| chr17 | 36894839 | G | A,G   | G     | Heterozygous CTC subset of CPP |
| chr17 | 36909015 | G | A,G   | G     | Heterozygous CTC subset of CPP |
| chr17 | 36909061 | A | A,G   | G     | Heterozygous CTC subset of CPP |
| chr17 | 36920439 | C | C     | C     | Heterozygous CTC subset of CPP |
| chr17 | 36926023 | G | G     | G     | Heterozygous CTC subset of CPP |
| chr17 | 37006621 | T | C,T   | C,T   | Heterozygous CTC subset of CPP |
| chr17 | 37360427 | A | A     | A     | Heterozygous CTC subset of CPP |
| chr17 | 37627234 | T | T     | T     | Heterozygous CTC subset of CPP |
| chr17 | 37627247 | A | A     | A     | Heterozygous CTC subset of CPP |
| chr17 | 37687017 | G | G     | G     | Heterozygous CTC subset of CPP |
| chr17 | 37814080 | G | A,G   | A,G   | Heterozygous CTC subset of CPP |
| chr17 | 37879861 | A | A     | A     | Heterozygous CTC subset of CPP |
| chr17 | 37881162 | A | A     | A     | Heterozygous CTC subset of CPP |
| chr17 | 37883760 | T | T     | T     | Heterozygous CTC subset of CPP |
| chr17 | 37884214 | G | G,T   | G     | Heterozygous CTC subset of CPP |
| chr17 | 38137364 | G | A,G   | G     | Heterozygous CTC subset of CPP |
| chr17 | 38144938 | A | A     | A     | Heterozygous CTC subset of CPP |
| chr17 | 38146154 | T | C,T   | C,T   | Heterozygous CTC subset of CPP |
| chr17 | 38153826 | T | T     | T     | Heterozygous CTC subset of CPP |
| chr17 | 38153827 | T | T     | T     | Heterozygous CTC subset of CPP |
| chr17 | 38182447 | T | T     | T     | Heterozygous CTC subset of CPP |
| chr17 | 38251934 | T | T     | T     | Heterozygous CTC subset of CPP |
| chr17 | 38279207 | T | T     | T     | Heterozygous CTC subset of CPP |
| chr17 | 38289837 | T | T     | T     | Heterozygous CTC subset of CPP |
| chr17 | 38290152 | A | A     | A     | Heterozygous CTC subset of CPP |
| chr17 | 38325911 | T | +A,T  | +A,T  | Heterozygous CTC subset of CPP |
| chr17 | 38328367 | T | T     | T     | Heterozygous CTC subset of CPP |
| chr17 | 38412771 | T | T     | T     | Heterozygous CTC subset of CPP |
| chr17 | 38556250 | C | C     | C     | Heterozygous CTC subset of CPP |
| chr17 | 38633854 | C | C,T   | C     | Heterozygous CTC subset of CPP |
| chr17 | 39680520 | T | +C,T  | T     | Heterozygous CTC subset of CPP |
| chr17 | 39681440 | C | +AA,C | +AA,C | Heterozygous CTC subset of CPP |
| chr17 | 39846341 | A | A     | A     | Heterozygous CTC subset of CPP |
| chr17 | 39914661 | A | A     | A     | Heterozygous CTC subset of CPP |
| chr17 | 39925713 | C | C,T   | C     | Heterozygous CTC subset of CPP |
| chr17 | 39967442 | T | C,T   | T     | Heterozygous CTC subset of CPP |
| chr17 | 39967514 | A | A     | A     | Heterozygous CTC subset of CPP |
| chr17 | 39983849 | G | C,G   | C     | Heterozygous CTC subset of CPP |

Grillet et al., Supplementary Table 5

|       |          |   |      |      |                                |
|-------|----------|---|------|------|--------------------------------|
| chr17 | 40065774 | T | G,T  | T    | Heterozygous CTC subset of CPP |
| chr17 | 40075130 | C | +T,C | +T,C | Heterozygous CTC subset of CPP |
| chr17 | 40125864 | G | A,G  | A,G  | Heterozygous CTC subset of CPP |
| chr17 | 40175673 | T | T    | T    | Heterozygous CTC subset of CPP |
| chr17 | 40266939 | G | A,G  | G    | Heterozygous CTC subset of CPP |
| chr17 | 40474376 | A | A    | A    | Heterozygous CTC subset of CPP |
| chr17 | 40477025 | A | A    | A    | Heterozygous CTC subset of CPP |
| chr17 | 40489833 | T | T    | T    | Heterozygous CTC subset of CPP |
| chr17 | 40498718 | T | T    | T    | Heterozygous CTC subset of CPP |
| chr17 | 40714804 | C | A,C  | A,C  | Heterozygous CTC subset of CPP |
| chr17 | 40716520 | A | A,G  | A,G  | Heterozygous CTC subset of CPP |
| chr17 | 40722162 | G | A,G  | A,G  | Heterozygous CTC subset of CPP |
| chr17 | 41108238 | T | T    | T    | Heterozygous CTC subset of CPP |
| chr17 | 41116139 | G | G,T  | G    | Heterozygous CTC subset of CPP |
| chr17 | 41150764 | A | A,C  | A    | Heterozygous CTC subset of CPP |
| chr17 | 41154709 | T | T    | T    | Heterozygous CTC subset of CPP |
| chr17 | 41154932 | T | T    | T    | Heterozygous CTC subset of CPP |
| chr17 | 41174025 | A | A,C  | A,C  | Heterozygous CTC subset of CPP |
| chr17 | 41353777 | T | T    | T    | Heterozygous CTC subset of CPP |
| chr17 | 41362032 | T | T    | T    | Heterozygous CTC subset of CPP |
| chr17 | 42090511 | A | A    | A    | Heterozygous CTC subset of CPP |
| chr17 | 42152103 | G | A,G  | G    | Heterozygous CTC subset of CPP |
| chr17 | 42153562 | G | C,G  | G    | Heterozygous CTC subset of CPP |
| chr17 | 42153622 | A | A    | A    | Heterozygous CTC subset of CPP |
| chr17 | 42267969 | A | A    | A    | Heterozygous CTC subset of CPP |
| chr17 | 42287519 | C | C,T  | C,T  | Heterozygous CTC subset of CPP |
| chr17 | 42398052 | A | A,G  | A    | Heterozygous CTC subset of CPP |
| chr17 | 42475882 | A | A    | A    | Heterozygous CTC subset of CPP |
| chr17 | 42477963 | A | A    | A    | Heterozygous CTC subset of CPP |
| chr17 | 42756253 | T | -T,T | T    | Heterozygous CTC subset of CPP |
| chr17 | 42930757 | G | +C,G | G    | Heterozygous CTC subset of CPP |
| chr17 | 42953409 | A | A,G  | A,G  | Heterozygous CTC subset of CPP |
| chr17 | 43111688 | G | A,G  | G    | Heterozygous CTC subset of CPP |
| chr17 | 43171154 | C | C,T  | C,T  | Heterozygous CTC subset of CPP |
| chr17 | 43176804 | C | C,T  | C    | Heterozygous CTC subset of CPP |
| chr17 | 43183028 | G | A,G  | G    | Heterozygous CTC subset of CPP |
| chr17 | 43195663 | A | A    | A    | Heterozygous CTC subset of CPP |
| chr17 | 43226887 | A | A,G  | A    | Heterozygous CTC subset of CPP |
| chr17 | 43227214 | T | C,T  | T    | Heterozygous CTC subset of CPP |
| chr17 | 44109474 | G | A,G  | A    | Heterozygous CTC subset of CPP |
| chr17 | 44111590 | G | G    | G    | Heterozygous CTC subset of CPP |
| chr17 | 44248460 | A | A    | A    | Heterozygous CTC subset of CPP |
| chr17 | 44248848 | G | A,G  | G    | Heterozygous CTC subset of CPP |
| chr17 | 44248913 | C | C    | C    | Heterozygous CTC subset of CPP |
| chr17 | 44249367 | C | C    | C    | Heterozygous CTC subset of CPP |
| chr17 | 44788420 | G | G    | G    | Heterozygous CTC subset of CPP |



Grillet et al., Supplementary Table 5

|       |          |   |      |      |                                |
|-------|----------|---|------|------|--------------------------------|
| chr17 | 44806240 | T | T    | T    | Heterozygous CTC subset of CPP |
| chr17 | 45000529 | G | C,G  | G    | Heterozygous CTC subset of CPP |
| chr17 | 45008570 | G | A,G  | G    | Heterozygous CTC subset of CPP |
| chr17 | 45214682 | A | A    | A    | Heterozygous CTC subset of CPP |
| chr17 | 45266571 | T | T    | T    | Heterozygous CTC subset of CPP |
| chr17 | 45757872 | A | +G,A | +G,A | Heterozygous CTC subset of CPP |
| chr17 | 45994094 | T | C,T  | C,T  | Heterozygous CTC subset of CPP |
| chr17 | 45994154 | G | A,G  | A,G  | Heterozygous CTC subset of CPP |
| chr17 | 45994257 | G | G    | G    | Heterozygous CTC subset of CPP |
| chr17 | 46022065 | G | A,G  | G    | Heterozygous CTC subset of CPP |
| chr17 | 46023694 | G | A,G  | A,G  | Heterozygous CTC subset of CPP |
| chr17 | 46136133 | G | C,G  | G    | Heterozygous CTC subset of CPP |
| chr17 | 46673724 | C | C,T  | C    | Heterozygous CTC subset of CPP |
| chr17 | 46674034 | C | -C,C | C    | Heterozygous CTC subset of CPP |
| chr17 | 46928538 | C | C    | C    | Heterozygous CTC subset of CPP |
| chr17 | 46986019 | G | G    | G    | Heterozygous CTC subset of CPP |
| chr17 | 47000251 | C | C,T  | C,T  | Heterozygous CTC subset of CPP |
| chr17 | 47778803 | A | A    | A    | Heterozygous CTC subset of CPP |
| chr17 | 47875859 | T | T    | T    | Heterozygous CTC subset of CPP |
| chr17 | 48226811 | C | C,T  | C    | Heterozygous CTC subset of CPP |
| chr17 | 48828088 | T | T    | T    | Heterozygous CTC subset of CPP |
| chr17 | 48940422 | T | C    | C    | Heterozygous CTC subset of CPP |
| chr17 | 49079087 | T | T    | T    | Heterozygous CTC subset of CPP |
| chr17 | 49084680 | A | A    | A    | Heterozygous CTC subset of CPP |
| chr17 | 49244184 | G | G    | G    | Heterozygous CTC subset of CPP |
| chr17 | 49244186 | A | A    | A    | Heterozygous CTC subset of CPP |
| chr17 | 49350802 | A | A,C  | A,C  | Heterozygous CTC subset of CPP |
| chr17 | 53042076 | A | A    | A    | Heterozygous CTC subset of CPP |
| chr17 | 53042148 | A | A    | A    | Heterozygous CTC subset of CPP |
| chr17 | 54978816 | A | A    | A    | Heterozygous CTC subset of CPP |
| chr17 | 55028170 | C | C,T  | C,T  | Heterozygous CTC subset of CPP |
| chr17 | 55182812 | T | -T,T | T    | Heterozygous CTC subset of CPP |
| chr17 | 55182878 | C | C,T  | C    | Heterozygous CTC subset of CPP |
| chr17 | 55183203 | T | C,T  | T    | Heterozygous CTC subset of CPP |
| chr17 | 55183716 | T | C,T  | T    | Heterozygous CTC subset of CPP |
| chr17 | 55334906 | C | C    | C    | Heterozygous CTC subset of CPP |
| chr17 | 55607084 | A | +G,A | +G,A | Heterozygous CTC subset of CPP |
| chr17 | 56083889 | C | -C,C | -C,C | Heterozygous CTC subset of CPP |
| chr17 | 56083890 | T | -T,C | -T,C | Heterozygous CTC subset of CPP |
| chr17 | 56424602 | C | C    | C    | Heterozygous CTC subset of CPP |
| chr17 | 56435684 | T | T    | T    | Heterozygous CTC subset of CPP |
| chr17 | 56435885 | G | G,T  | G    | Heterozygous CTC subset of CPP |
| chr17 | 56584508 | T | C,T  | T    | Heterozygous CTC subset of CPP |
| chr17 | 57196754 | T | T    | T    | Heterozygous CTC subset of CPP |
| chr17 | 57262843 | T | T    | T    | Heterozygous CTC subset of CPP |
| chr17 | 57816222 | T | T    | T    | Heterozygous CTC subset of CPP |

Grillet et al., Supplementary Table 5

|       |          |   |        |      |                                |
|-------|----------|---|--------|------|--------------------------------|
| chr17 | 59668002 | G | G      | G    | Heterozygous CTC subset of CPP |
| chr17 | 60033102 | A | A      | A    | Heterozygous CTC subset of CPP |
| chr17 | 60060372 | C | C      | C    | Heterozygous CTC subset of CPP |
| chr17 | 60088264 | A | A      | A    | Heterozygous CTC subset of CPP |
| chr17 | 60525994 | T | T      | T    | Heterozygous CTC subset of CPP |
| chr17 | 61660890 | G | -G,G   | -G,G | Heterozygous CTC subset of CPP |
| chr17 | 61666687 | C | C,T    | C    | Heterozygous CTC subset of CPP |
| chr17 | 61897533 | T | T      | T    | Heterozygous CTC subset of CPP |
| chr17 | 61901197 | T | A,T    | A,T  | Heterozygous CTC subset of CPP |
| chr17 | 61903445 | G | C,G    | C,G  | Heterozygous CTC subset of CPP |
| chr17 | 61908271 | C | C,T    | C,T  | Heterozygous CTC subset of CPP |
| chr17 | 62492820 | A | A      | A    | Heterozygous CTC subset of CPP |
| chr17 | 62500434 | T | +TG,T  | T    | Heterozygous CTC subset of CPP |
| chr17 | 65362552 | T | A,T    | A,T  | Heterozygous CTC subset of CPP |
| chr17 | 65718725 | A | A      | A    | Heterozygous CTC subset of CPP |
| chr17 | 65739627 | A | A,G    | A,G  | Heterozygous CTC subset of CPP |
| chr17 | 65739668 | T | T      | T    | Heterozygous CTC subset of CPP |
| chr17 | 65850119 | C | C      | C    | Heterozygous CTC subset of CPP |
| chr17 | 65889591 | A | A      | A    | Heterozygous CTC subset of CPP |
| chr17 | 65899950 | C | C      | C    | Heterozygous CTC subset of CPP |
| chr17 | 65907471 | A | A      | A    | Heterozygous CTC subset of CPP |
| chr17 | 65914951 | A | A      | A    | Heterozygous CTC subset of CPP |
| chr17 | 65955848 | T | T      | T    | Heterozygous CTC subset of CPP |
| chr17 | 65960504 | T | T      | T    | Heterozygous CTC subset of CPP |
| chr17 | 71205854 | A | A,G    | A,G  | Heterozygous CTC subset of CPP |
| chr17 | 72764883 | A | A      | A    | Heterozygous CTC subset of CPP |
| chr17 | 72862593 | C | C,T    | C    | Heterozygous CTC subset of CPP |
| chr17 | 73016621 | C | C,T    | C,T  | Heterozygous CTC subset of CPP |
| chr17 | 73132346 | C | -C,C   | -C,C | Heterozygous CTC subset of CPP |
| chr17 | 73132347 | T | -T,C,T | -T,C | Heterozygous CTC subset of CPP |
| chr17 | 73132348 | A | A      | A    | Heterozygous CTC subset of CPP |
| chr17 | 73517536 | G | A,G    | G    | Heterozygous CTC subset of CPP |
| chr17 | 73517913 | A | A      | A    | Heterozygous CTC subset of CPP |
| chr17 | 73517914 | T | T      | T    | Heterozygous CTC subset of CPP |
| chr17 | 73552185 | G | A,G    | A    | Heterozygous CTC subset of CPP |
| chr17 | 73567846 | C | C,T    | C    | Heterozygous CTC subset of CPP |
| chr17 | 73568055 | C | C,T    | C    | Heterozygous CTC subset of CPP |
| chr17 | 73570036 | C | C      | C    | Heterozygous CTC subset of CPP |
| chr17 | 73663524 | C | C,T    | C    | Heterozygous CTC subset of CPP |
| chr17 | 73750670 | T | T      | T    | Heterozygous CTC subset of CPP |
| chr17 | 73871126 | A | A      | A    | Heterozygous CTC subset of CPP |
| chr17 | 74056413 | C | C,T    | C,T  | Heterozygous CTC subset of CPP |
| chr17 | 74078650 | T | T      | T    | Heterozygous CTC subset of CPP |
| chr17 | 74084937 | C | C,T    | C    | Heterozygous CTC subset of CPP |
| chr17 | 74261677 | T | C,T    | C    | Heterozygous CTC subset of CPP |
| chr17 | 74328387 | A | A      | A    | Heterozygous CTC subset of CPP |

Grillet et al., Supplementary Table 5

|       |          |   |        |        |                                |
|-------|----------|---|--------|--------|--------------------------------|
| chr17 | 74395567 | T | T      | T      | Heterozygous CTC subset of CPP |
| chr17 | 74557431 | C | C,T    | C      | Heterozygous CTC subset of CPP |
| chr17 | 74557467 | G | G,T    | G      | Heterozygous CTC subset of CPP |
| chr17 | 74716468 | A | A      | A      | Heterozygous CTC subset of CPP |
| chr17 | 75187340 | T | T      | T      | Heterozygous CTC subset of CPP |
| chr17 | 75495065 | T | C,T    | C,T    | Heterozygous CTC subset of CPP |
| chr17 | 75495397 | T | C,T    | C,T    | Heterozygous CTC subset of CPP |
| chr17 | 76167047 | C | C,T    | C,T    | Heterozygous CTC subset of CPP |
| chr17 | 76178748 | T | C,T    | C      | Heterozygous CTC subset of CPP |
| chr17 | 76183043 | A | A,G    | A,G    | Heterozygous CTC subset of CPP |
| chr17 | 76210367 | G | C,G    | G      | Heterozygous CTC subset of CPP |
| chr17 | 76396860 | G | G      | G      | Heterozygous CTC subset of CPP |
| chr17 | 76396864 | G | G      | G      | Heterozygous CTC subset of CPP |
| chr17 | 76688527 | T | T      | T      | Heterozygous CTC subset of CPP |
| chr17 | 76798513 | T | T      | T      | Heterozygous CTC subset of CPP |
| chr17 | 76799725 | C | C      | C      | Heterozygous CTC subset of CPP |
| chr17 | 76799898 | A | A,G    | G      | Heterozygous CTC subset of CPP |
| chr17 | 76802344 | C | C,T    | C      | Heterozygous CTC subset of CPP |
| chr17 | 76803659 | T | C,T    | T      | Heterozygous CTC subset of CPP |
| chr17 | 76988785 | G | A,G    | G      | Heterozygous CTC subset of CPP |
| chr17 | 76993546 | A | A,G    | A      | Heterozygous CTC subset of CPP |
| chr17 | 77768961 | A | A      | A      | Heterozygous CTC subset of CPP |
| chr17 | 77808750 | T | T      | T      | Heterozygous CTC subset of CPP |
| chr17 | 79213456 | T | T      | T      | Heterozygous CTC subset of CPP |
| chr17 | 79226296 | C | C      | C      | Heterozygous CTC subset of CPP |
| chr17 | 79478019 | G | A,G    | A      | Heterozygous CTC subset of CPP |
| chr17 | 79479808 | C | C,T    | T      | Heterozygous CTC subset of CPP |
| chr17 | 79507926 | A | A      | A      | Heterozygous CTC subset of CPP |
| chr17 | 79511088 | T | T      | T      | Heterozygous CTC subset of CPP |
| chr17 | 79526402 | G | C,G    | C,G    | Heterozygous CTC subset of CPP |
| chr17 | 79571637 | C | C,G    | C,G    | Heterozygous CTC subset of CPP |
| chr17 | 79682558 | T | C,T    | C      | Heterozygous CTC subset of CPP |
| chr17 | 79803101 | A | A,G    | A      | Heterozygous CTC subset of CPP |
| chr17 | 79805134 | G | A,G    | G      | Heterozygous CTC subset of CPP |
| chr17 | 79818260 | G | G,T    | G      | Heterozygous CTC subset of CPP |
| chr17 | 79864369 | A | A      | A      | Heterozygous CTC subset of CPP |
| chr17 | 79943415 | G | A,G    | G      | Heterozygous CTC subset of CPP |
| chr17 | 79985940 | T | T      | T      | Heterozygous CTC subset of CPP |
| chr17 | 79988342 | G | G      | G      | Heterozygous CTC subset of CPP |
| chr17 | 80008392 | G | G,T    | T      | Heterozygous CTC subset of CPP |
| chr17 | 80019493 | C | -C,C,T | -C,C,T | Heterozygous CTC subset of CPP |
| chr17 | 80036970 | T | T      | T      | Heterozygous CTC subset of CPP |
| chr17 | 80036975 | T | T      | T      | Heterozygous CTC subset of CPP |
| chr17 | 80037483 | A | A      | A      | Heterozygous CTC subset of CPP |
| chr17 | 80039481 | G | A,G    | G      | Heterozygous CTC subset of CPP |
| chr17 | 80040541 | C | A,C    | C      | Heterozygous CTC subset of CPP |

Grillet et al., Supplementary Table 5

|       |          |   |       |       |                                |
|-------|----------|---|-------|-------|--------------------------------|
| chr17 | 80044211 | G | A,G   | G     | Heterozygous CTC subset of CPP |
| chr17 | 80051183 | A | A,G   | A     | Heterozygous CTC subset of CPP |
| chr17 | 80194105 | C | C     | C     | Heterozygous CTC subset of CPP |
| chr17 | 80209282 | G | A,G   | G     | Heterozygous CTC subset of CPP |
| chr17 | 80350305 | T | T     | T     | Heterozygous CTC subset of CPP |
| chr17 | 80350331 | G | A,G   | G     | Heterozygous CTC subset of CPP |
| chr17 | 80436762 | T | T     | T     | Heterozygous CTC subset of CPP |
| chr17 | 80540790 | T | T     | T     | Heterozygous CTC subset of CPP |
| chr17 | 80583268 | T | T     | T     | Heterozygous CTC subset of CPP |
| chr17 | 80585092 | A | A     | A     | Heterozygous CTC subset of CPP |
| chr17 | 80585094 | C | C,T   | C,T   | Heterozygous CTC subset of CPP |
| chr17 | 80899281 | G | A,G   | A,G   | Heterozygous CTC subset of CPP |
| chr17 | 81043039 | A | A     | A     | Heterozygous CTC subset of CPP |
| chr17 | 81043052 | A | A     | A     | Heterozygous CTC subset of CPP |
| chr17 | 81052130 | A | A     | A     | Heterozygous CTC subset of CPP |
| chr18 | 252568   | T | T     | T     | Heterozygous CTC subset of CPP |
| chr18 | 739741   | A | A     | A     | Heterozygous CTC subset of CPP |
| chr18 | 2577846  | A | A     | A     | Heterozygous CTC subset of CPP |
| chr18 | 2590082  | A | A     | A     | Heterozygous CTC subset of CPP |
| chr18 | 2595443  | G | G     | G     | Heterozygous CTC subset of CPP |
| chr18 | 2772304  | G | G     | G     | Heterozygous CTC subset of CPP |
| chr18 | 2946105  | T | +TC,T | +TC,T | Heterozygous CTC subset of CPP |
| chr18 | 3273079  | A | A     | A     | Heterozygous CTC subset of CPP |
| chr18 | 3450455  | C | A,C   | C     | Heterozygous CTC subset of CPP |
| chr18 | 9124952  | C | C     | C     | Heterozygous CTC subset of CPP |
| chr18 | 9536691  | G | A,G   | G     | Heterozygous CTC subset of CPP |
| chr18 | 9570471  | A | A     | A     | Heterozygous CTC subset of CPP |
| chr18 | 9931810  | C | C     | C     | Heterozygous CTC subset of CPP |
| chr18 | 9936206  | C | C     | C     | Heterozygous CTC subset of CPP |
| chr18 | 11999115 | T | C,T   | T     | Heterozygous CTC subset of CPP |
| chr18 | 12329536 | C | C,G   | C     | Heterozygous CTC subset of CPP |
| chr18 | 12348273 | A | A     | A     | Heterozygous CTC subset of CPP |
| chr18 | 12348285 | T | C,T   | C     | Heterozygous CTC subset of CPP |
| chr18 | 12351342 | C | C,T   | T     | Heterozygous CTC subset of CPP |
| chr18 | 12370873 | A | A     | A     | Heterozygous CTC subset of CPP |
| chr18 | 12706720 | G | G     | G     | Heterozygous CTC subset of CPP |
| chr18 | 12720543 | C | C     | C     | Heterozygous CTC subset of CPP |
| chr18 | 12951878 | G | A,G   | G     | Heterozygous CTC subset of CPP |
| chr18 | 12971157 | G | A,G   | G     | Heterozygous CTC subset of CPP |
| chr18 | 18547750 | A | A     | A     | Heterozygous CTC subset of CPP |
| chr18 | 18588104 | T | T     | T     | Heterozygous CTC subset of CPP |
| chr18 | 19209087 | T | T     | T     | Heterozygous CTC subset of CPP |
| chr18 | 20572852 | G | G     | G     | Heterozygous CTC subset of CPP |
| chr18 | 20577669 | G | A,G   | G     | Heterozygous CTC subset of CPP |
| chr18 | 20817206 | C | C,T   | C     | Heterozygous CTC subset of CPP |
| chr18 | 28673565 | T | T     | T     | Heterozygous CTC subset of CPP |

Grillet et al., Supplementary Table 5

|       |          |   |       |   |                                |
|-------|----------|---|-------|---|--------------------------------|
| chr18 | 29104698 | C | C,T   | T | Heterozygous CTC subset of CPP |
| chr18 | 29104714 | A | A,G   | A | Heterozygous CTC subset of CPP |
| chr18 | 29122618 | G | A,G   | G | Heterozygous CTC subset of CPP |
| chr18 | 29122799 | G | A,G   | G | Heterozygous CTC subset of CPP |
| chr18 | 29126670 | T | C,T   | C | Heterozygous CTC subset of CPP |
| chr18 | 32919894 | A | A     | A | Heterozygous CTC subset of CPP |
| chr18 | 33270987 | T | T     | T | Heterozygous CTC subset of CPP |
| chr18 | 33289666 | A | A     | A | Heterozygous CTC subset of CPP |
| chr18 | 33557459 | C | C     | C | Heterozygous CTC subset of CPP |
| chr18 | 33694120 | G | A,G   | G | Heterozygous CTC subset of CPP |
| chr18 | 33704508 | A | A     | A | Heterozygous CTC subset of CPP |
| chr18 | 33750046 | C | C,T   | T | Heterozygous CTC subset of CPP |
| chr18 | 34376736 | T | -TG,T | T | Heterozygous CTC subset of CPP |
| chr18 | 34398914 | C | C,T   | C | Heterozygous CTC subset of CPP |
| chr18 | 43675020 | A | A     | A | Heterozygous CTC subset of CPP |
| chr18 | 47323933 | T | T     | T | Heterozygous CTC subset of CPP |
| chr18 | 47809302 | C | C     | C | Heterozygous CTC subset of CPP |
| chr18 | 47809310 | A | A     | A | Heterozygous CTC subset of CPP |
| chr18 | 48443832 | C | C     | C | Heterozygous CTC subset of CPP |
| chr18 | 48452220 | T | T     | T | Heterozygous CTC subset of CPP |
| chr18 | 55273151 | T | C,T   | T | Heterozygous CTC subset of CPP |
| chr18 | 55990514 | C | C     | C | Heterozygous CTC subset of CPP |
| chr18 | 55992386 | A | A     | A | Heterozygous CTC subset of CPP |
| chr18 | 56018257 | G | G     | G | Heterozygous CTC subset of CPP |
| chr18 | 56040416 | A | A     | A | Heterozygous CTC subset of CPP |
| chr18 | 56052801 | A | A     | A | Heterozygous CTC subset of CPP |
| chr18 | 57022754 | T | C,T   | C | Heterozygous CTC subset of CPP |
| chr18 | 57026361 | A | A,G   | G | Heterozygous CTC subset of CPP |
| chr18 | 57569962 | A | A     | A | Heterozygous CTC subset of CPP |
| chr18 | 61002559 | A | A     | A | Heterozygous CTC subset of CPP |
| chr18 | 61064364 | T | T     | T | Heterozygous CTC subset of CPP |
| chr18 | 61067386 | A | A     | A | Heterozygous CTC subset of CPP |
| chr18 | 61071015 | C | C     | C | Heterozygous CTC subset of CPP |
| chr18 | 61077610 | T | T     | T | Heterozygous CTC subset of CPP |
| chr18 | 71822602 | T | T     | T | Heterozygous CTC subset of CPP |
| chr18 | 71825719 | A | A,G   | G | Heterozygous CTC subset of CPP |
| chr18 | 71825746 | T | T     | T | Heterozygous CTC subset of CPP |
| chr18 | 72168568 | T | T     | T | Heterozygous CTC subset of CPP |
| chr18 | 72168608 | G | A,G   | G | Heterozygous CTC subset of CPP |
| chr18 | 72176083 | T | C,T   | T | Heterozygous CTC subset of CPP |
| chr18 | 72178161 | T | C,T   | T | Heterozygous CTC subset of CPP |
| chr18 | 77805856 | A | A,C   | A | Heterozygous CTC subset of CPP |
| chr18 | 77805949 | A | A,C   | A | Heterozygous CTC subset of CPP |
| chr18 | 77896242 | C | C,T   | C | Heterozygous CTC subset of CPP |
| chr19 | 287703   | G | A,G   | G | Heterozygous CTC subset of CPP |
| chr19 | 579627   | C | C,T   | C | Heterozygous CTC subset of CPP |

Grillet et al., Supplementary Table 5

|       |         |   |      |      |                                |
|-------|---------|---|------|------|--------------------------------|
| chr19 | 580388  | C | C,G  | C    | Heterozygous CTC subset of CPP |
| chr19 | 630076  | T | T    | T    | Heterozygous CTC subset of CPP |
| chr19 | 757321  | C | C    | C    | Heterozygous CTC subset of CPP |
| chr19 | 804396  | C | C,T  | C    | Heterozygous CTC subset of CPP |
| chr19 | 804642  | C | C,T  | C    | Heterozygous CTC subset of CPP |
| chr19 | 808586  | C | C,G  | C    | Heterozygous CTC subset of CPP |
| chr19 | 808742  | G | G,T  | G    | Heterozygous CTC subset of CPP |
| chr19 | 810693  | G | -G,G | -G   | Heterozygous CTC subset of CPP |
| chr19 | 875354  | A | A    | A    | Heterozygous CTC subset of CPP |
| chr19 | 901485  | G | G    | G    | Heterozygous CTC subset of CPP |
| chr19 | 984533  | T | C,T  | T    | Heterozygous CTC subset of CPP |
| chr19 | 984554  | C | C,G  | C    | Heterozygous CTC subset of CPP |
| chr19 | 1011196 | T | T    | T    | Heterozygous CTC subset of CPP |
| chr19 | 1014398 | A | A,G  | G    | Heterozygous CTC subset of CPP |
| chr19 | 1020989 | C | A,C  | C    | Heterozygous CTC subset of CPP |
| chr19 | 1036444 | G | A,G  | G    | Heterozygous CTC subset of CPP |
| chr19 | 1095336 | C | C,T  | C    | Heterozygous CTC subset of CPP |
| chr19 | 1104078 | G | A,G  | G    | Heterozygous CTC subset of CPP |
| chr19 | 1104874 | C | C,T  | C    | Heterozygous CTC subset of CPP |
| chr19 | 1105809 | G | -G,A | -G,A | Heterozygous CTC subset of CPP |
| chr19 | 1106396 | C | -C,C | -C   | Heterozygous CTC subset of CPP |
| chr19 | 1108670 | A | A    | A    | Heterozygous CTC subset of CPP |
| chr19 | 1110756 | T | T    | T    | Heterozygous CTC subset of CPP |
| chr19 | 1110772 | C | C    | C    | Heterozygous CTC subset of CPP |
| chr19 | 1221282 | A | A    | A    | Heterozygous CTC subset of CPP |
| chr19 | 1242608 | G | -G,G | -G,G | Heterozygous CTC subset of CPP |
| chr19 | 1254187 | C | C,T  | C    | Heterozygous CTC subset of CPP |
| chr19 | 1256998 | C | C,T  | C,T  | Heterozygous CTC subset of CPP |
| chr19 | 1370675 | C | C,G  | G    | Heterozygous CTC subset of CPP |
| chr19 | 1425963 | T | -T,T | -T,T | Heterozygous CTC subset of CPP |
| chr19 | 1425965 | T | A,T  | A,T  | Heterozygous CTC subset of CPP |
| chr19 | 1430261 | G | G    | G    | Heterozygous CTC subset of CPP |
| chr19 | 1430351 | G | A,G  | G    | Heterozygous CTC subset of CPP |
| chr19 | 1440452 | T | C,T  | T    | Heterozygous CTC subset of CPP |
| chr19 | 1440454 | T | T    | T    | Heterozygous CTC subset of CPP |
| chr19 | 1555675 | A | A    | A    | Heterozygous CTC subset of CPP |
| chr19 | 1556921 | G | G    | G    | Heterozygous CTC subset of CPP |
| chr19 | 1581265 | A | A    | A    | Heterozygous CTC subset of CPP |
| chr19 | 1621865 | C | C,T  | C    | Heterozygous CTC subset of CPP |
| chr19 | 1622116 | G | A,G  | G    | Heterozygous CTC subset of CPP |
| chr19 | 1997363 | A | A,G  | A,G  | Heterozygous CTC subset of CPP |
| chr19 | 2046403 | G | A,G  | G    | Heterozygous CTC subset of CPP |
| chr19 | 2118831 | C | C    | C    | Heterozygous CTC subset of CPP |
| chr19 | 2138654 | T | G,T  | G,T  | Heterozygous CTC subset of CPP |
| chr19 | 2248152 | T | T    | T    | Heterozygous CTC subset of CPP |
| chr19 | 2248176 | G | A,G  | G    | Heterozygous CTC subset of CPP |

Grillet et al., Supplementary Table 5

|       |         |   |        |        |                                |
|-------|---------|---|--------|--------|--------------------------------|
| chr19 | 2248179 | T | T      | T      | Heterozygous CTC subset of CPP |
| chr19 | 2344030 | T | T      | T      | Heterozygous CTC subset of CPP |
| chr19 | 2344037 | G | +A,G   | G      | Heterozygous CTC subset of CPP |
| chr19 | 2344366 | A | A      | A      | Heterozygous CTC subset of CPP |
| chr19 | 3053820 | A | A      | A      | Heterozygous CTC subset of CPP |
| chr19 | 3053821 | T | T      | T      | Heterozygous CTC subset of CPP |
| chr19 | 3110198 | A | A,G    | A      | Heterozygous CTC subset of CPP |
| chr19 | 3119270 | T | T      | T      | Heterozygous CTC subset of CPP |
| chr19 | 3121010 | G | A,G    | G      | Heterozygous CTC subset of CPP |
| chr19 | 3207249 | G | G      | G      | Heterozygous CTC subset of CPP |
| chr19 | 3434297 | A | A      | A      | Heterozygous CTC subset of CPP |
| chr19 | 3578653 | C | C,T    | C      | Heterozygous CTC subset of CPP |
| chr19 | 3620763 | T | T      | T      | Heterozygous CTC subset of CPP |
| chr19 | 3762698 | C | C,T    | C,T    | Heterozygous CTC subset of CPP |
| chr19 | 3767265 | C | C,T    | C,T    | Heterozygous CTC subset of CPP |
| chr19 | 3977815 | A | +C,G   | +C,G   | Heterozygous CTC subset of CPP |
| chr19 | 3981335 | A | +G,A   | +G,A   | Heterozygous CTC subset of CPP |
| chr19 | 3981336 | C | +C,C,G | +C,C,G | Heterozygous CTC subset of CPP |
| chr19 | 4037719 | A | A      | A      | Heterozygous CTC subset of CPP |
| chr19 | 4037737 | T | T      | T      | Heterozygous CTC subset of CPP |
| chr19 | 4054488 | T | T      | T      | Heterozygous CTC subset of CPP |
| chr19 | 4090572 | G | A,G    | G      | Heterozygous CTC subset of CPP |
| chr19 | 4095430 | G | G      | G      | Heterozygous CTC subset of CPP |
| chr19 | 4102449 | G | A,G    | G      | Heterozygous CTC subset of CPP |
| chr19 | 4361639 | G | A,G    | G      | Heterozygous CTC subset of CPP |
| chr19 | 4362691 | G | C,G    | G      | Heterozygous CTC subset of CPP |
| chr19 | 4433452 | G | G      | G      | Heterozygous CTC subset of CPP |
| chr19 | 4454000 | G | A,G    | A,G    | Heterozygous CTC subset of CPP |
| chr19 | 4457650 | C | C,T    | C      | Heterozygous CTC subset of CPP |
| chr19 | 4493708 | A | A,G    | G      | Heterozygous CTC subset of CPP |
| chr19 | 4499642 | G | A,G    | A,G    | Heterozygous CTC subset of CPP |
| chr19 | 4499647 | G | A,G    | A,G    | Heterozygous CTC subset of CPP |
| chr19 | 4499665 | C | C      | C      | Heterozygous CTC subset of CPP |
| chr19 | 4499666 | T | T      | T      | Heterozygous CTC subset of CPP |
| chr19 | 4679911 | T | T      | T      | Heterozygous CTC subset of CPP |
| chr19 | 4792814 | T | T      | T      | Heterozygous CTC subset of CPP |
| chr19 | 4793079 | A | A      | A      | Heterozygous CTC subset of CPP |
| chr19 | 4859646 | T | T      | T      | Heterozygous CTC subset of CPP |
| chr19 | 4859682 | C | C      | C      | Heterozygous CTC subset of CPP |
| chr19 | 4859684 | A | A      | A      | Heterozygous CTC subset of CPP |
| chr19 | 4947183 | G | G      | G      | Heterozygous CTC subset of CPP |
| chr19 | 5595507 | C | C      | C      | Heterozygous CTC subset of CPP |
| chr19 | 5894714 | A | A      | A      | Heterozygous CTC subset of CPP |
| chr19 | 6361577 | T | T      | T      | Heterozygous CTC subset of CPP |
| chr19 | 6361702 | G | G      | G      | Heterozygous CTC subset of CPP |
| chr19 | 6444221 | G | G      | G      | Heterozygous CTC subset of CPP |

Grillet et al., Supplementary Table 5

|       |          |   |      |      |                                |
|-------|----------|---|------|------|--------------------------------|
| chr19 | 6732091  | T | T    | T    | Heterozygous CTC subset of CPP |
| chr19 | 6732133  | A | A    | A    | Heterozygous CTC subset of CPP |
| chr19 | 6732560  | T | T    | T    | Heterozygous CTC subset of CPP |
| chr19 | 6734317  | C | C    | C    | Heterozygous CTC subset of CPP |
| chr19 | 6735673  | T | T    | T    | Heterozygous CTC subset of CPP |
| chr19 | 7605566  | C | C,T  | C    | Heterozygous CTC subset of CPP |
| chr19 | 7680076  | A | A    | A    | Heterozygous CTC subset of CPP |
| chr19 | 7685737  | T | T    | T    | Heterozygous CTC subset of CPP |
| chr19 | 7685922  | G | +T,G | +T,G | Heterozygous CTC subset of CPP |
| chr19 | 7694393  | G | A,G  | A,G  | Heterozygous CTC subset of CPP |
| chr19 | 7711221  | T | C,T  | C,T  | Heterozygous CTC subset of CPP |
| chr19 | 7747293  | T | G,T  | G,T  | Heterozygous CTC subset of CPP |
| chr19 | 7747563  | T | T    | T    | Heterozygous CTC subset of CPP |
| chr19 | 7975185  | A | A    | A    | Heterozygous CTC subset of CPP |
| chr19 | 7976360  | A | A    | A    | Heterozygous CTC subset of CPP |
| chr19 | 8028544  | A | A,G  | A,G  | Heterozygous CTC subset of CPP |
| chr19 | 8367162  | A | A    | A    | Heterozygous CTC subset of CPP |
| chr19 | 8455339  | A | A    | A    | Heterozygous CTC subset of CPP |
| chr19 | 9673112  | T | T    | T    | Heterozygous CTC subset of CPP |
| chr19 | 9673131  | T | T    | T    | Heterozygous CTC subset of CPP |
| chr19 | 9673144  | T | T    | T    | Heterozygous CTC subset of CPP |
| chr19 | 9678802  | C | C    | C    | Heterozygous CTC subset of CPP |
| chr19 | 9940665  | T | T    | T    | Heterozygous CTC subset of CPP |
| chr19 | 10220380 | A | A    | A    | Heterozygous CTC subset of CPP |
| chr19 | 10225713 | T | T    | T    | Heterozygous CTC subset of CPP |
| chr19 | 10225777 | A | A,G  | G    | Heterozygous CTC subset of CPP |
| chr19 | 10226256 | A | A,G  | G    | Heterozygous CTC subset of CPP |
| chr19 | 10250765 | T | T    | T    | Heterozygous CTC subset of CPP |
| chr19 | 10431799 | G | G,T  | T    | Heterozygous CTC subset of CPP |
| chr19 | 10432234 | T | T    | T    | Heterozygous CTC subset of CPP |
| chr19 | 10433414 | G | G    | G    | Heterozygous CTC subset of CPP |
| chr19 | 10514182 | G | -G,G | G    | Heterozygous CTC subset of CPP |
| chr19 | 10600418 | G | A,G  | G    | Heterozygous CTC subset of CPP |
| chr19 | 10600442 | G | C,G  | G    | Heterozygous CTC subset of CPP |
| chr19 | 10602673 | A | A    | A    | Heterozygous CTC subset of CPP |
| chr19 | 10665828 | C | C,T  | C    | Heterozygous CTC subset of CPP |
| chr19 | 10670184 | C | C,G  | C    | Heterozygous CTC subset of CPP |
| chr19 | 10675695 | G | G    | G    | Heterozygous CTC subset of CPP |
| chr19 | 10676423 | G | A,G  | A    | Heterozygous CTC subset of CPP |
| chr19 | 10794149 | C | C,T  | C    | Heterozygous CTC subset of CPP |
| chr19 | 10794630 | G | G,T  | T    | Heterozygous CTC subset of CPP |
| chr19 | 10818198 | T | T    | T    | Heterozygous CTC subset of CPP |
| chr19 | 10922943 | A | A    | A    | Heterozygous CTC subset of CPP |
| chr19 | 10939792 | T | C,T  | C,T  | Heterozygous CTC subset of CPP |
| chr19 | 11034863 | A | A    | A    | Heterozygous CTC subset of CPP |
| chr19 | 11040314 | A | A    | A    | Heterozygous CTC subset of CPP |



Grillet et al., Supplementary Table 5

|       |          |   |      |      |                                |
|-------|----------|---|------|------|--------------------------------|
| chr19 | 11105608 | T | C,T  | C,T  | Heterozygous CTC subset of CPP |
| chr19 | 11118582 | A | A    | A    | Heterozygous CTC subset of CPP |
| chr19 | 11169514 | C | C,T  | C,T  | Heterozygous CTC subset of CPP |
| chr19 | 11170839 | T | C,T  | C,T  | Heterozygous CTC subset of CPP |
| chr19 | 11210912 | C | C,T  | C,T  | Heterozygous CTC subset of CPP |
| chr19 | 11233941 | A | A,G  | A,G  | Heterozygous CTC subset of CPP |
| chr19 | 11242011 | G | A,G  | G    | Heterozygous CTC subset of CPP |
| chr19 | 11242044 | G | A,G  | A,G  | Heterozygous CTC subset of CPP |
| chr19 | 11546531 | G | G    | G    | Heterozygous CTC subset of CPP |
| chr19 | 11558338 | A | A,G  | A    | Heterozygous CTC subset of CPP |
| chr19 | 11618566 | C | C,T  | C    | Heterozygous CTC subset of CPP |
| chr19 | 11624937 | T | T    | T    | Heterozygous CTC subset of CPP |
| chr19 | 12772165 | G | A,G  | G    | Heterozygous CTC subset of CPP |
| chr19 | 12774208 | G | C,G  | G    | Heterozygous CTC subset of CPP |
| chr19 | 12774596 | T | T    | T    | Heterozygous CTC subset of CPP |
| chr19 | 12812588 | A | A    | A    | Heterozygous CTC subset of CPP |
| chr19 | 12816556 | T | T    | T    | Heterozygous CTC subset of CPP |
| chr19 | 12817570 | A | A    | A    | Heterozygous CTC subset of CPP |
| chr19 | 12849432 | T | T    | T    | Heterozygous CTC subset of CPP |
| chr19 | 12874388 | T | T    | T    | Heterozygous CTC subset of CPP |
| chr19 | 12921133 | G | G,T  | G    | Heterozygous CTC subset of CPP |
| chr19 | 12989505 | A | A    | A    | Heterozygous CTC subset of CPP |
| chr19 | 13007766 | T | T    | T    | Heterozygous CTC subset of CPP |
| chr19 | 13051467 | A | +G,A | +G,A | Heterozygous CTC subset of CPP |
| chr19 | 13065096 | T | C,T  | T    | Heterozygous CTC subset of CPP |
| chr19 | 13227067 | T | T    | T    | Heterozygous CTC subset of CPP |
| chr19 | 13260963 | C | C    | C    | Heterozygous CTC subset of CPP |
| chr19 | 14070276 | A | A    | A    | Heterozygous CTC subset of CPP |
| chr19 | 14200965 | T | T    | T    | Heterozygous CTC subset of CPP |
| chr19 | 14203944 | T | T    | T    | Heterozygous CTC subset of CPP |
| chr19 | 14554298 | T | T    | T    | Heterozygous CTC subset of CPP |
| chr19 | 14590236 | C | C,T  | C    | Heterozygous CTC subset of CPP |
| chr19 | 14629150 | G | A,G  | G    | Heterozygous CTC subset of CPP |
| chr19 | 14682804 | G | C,G  | C    | Heterozygous CTC subset of CPP |
| chr19 | 15227030 | G | A,G  | A    | Heterozygous CTC subset of CPP |
| chr19 | 15230024 | T | T    | T    | Heterozygous CTC subset of CPP |
| chr19 | 15349898 | T | T    | T    | Heterozygous CTC subset of CPP |
| chr19 | 15364972 | A | A    | A    | Heterozygous CTC subset of CPP |
| chr19 | 15491422 | A | A    | A    | Heterozygous CTC subset of CPP |
| chr19 | 15491423 | G | G    | G    | Heterozygous CTC subset of CPP |
| chr19 | 15508665 | T | T    | T    | Heterozygous CTC subset of CPP |
| chr19 | 16199918 | T | T    | T    | Heterozygous CTC subset of CPP |
| chr19 | 16301378 | A | A    | A    | Heterozygous CTC subset of CPP |
| chr19 | 17321611 | G | G    | G    | Heterozygous CTC subset of CPP |
| chr19 | 17534424 | A | A    | A    | Heterozygous CTC subset of CPP |
| chr19 | 17535807 | T | T    | T    | Heterozygous CTC subset of CPP |

Grillet et al., Supplementary Table 5

|       |          |   |      |      |                                |
|-------|----------|---|------|------|--------------------------------|
| chr19 | 17622614 | C | C,T  | C,T  | Heterozygous CTC subset of CPP |
| chr19 | 17683410 | G | G    | G    | Heterozygous CTC subset of CPP |
| chr19 | 17918917 | T | T    | T    | Heterozygous CTC subset of CPP |
| chr19 | 18047283 | T | G,T  | G,T  | Heterozygous CTC subset of CPP |
| chr19 | 18497024 | G | C,G  | C,G  | Heterozygous CTC subset of CPP |
| chr19 | 18499422 | C | C,G  | C    | Heterozygous CTC subset of CPP |
| chr19 | 18499470 | G | A,G  | G    | Heterozygous CTC subset of CPP |
| chr19 | 18538742 | A | A    | A    | Heterozygous CTC subset of CPP |
| chr19 | 18943179 | C | C    | C    | Heterozygous CTC subset of CPP |
| chr19 | 18971768 | T | T    | T    | Heterozygous CTC subset of CPP |
| chr19 | 19011198 | G | A,G  | G    | Heterozygous CTC subset of CPP |
| chr19 | 19033322 | C | C    | C    | Heterozygous CTC subset of CPP |
| chr19 | 19038842 | G | C,G  | G    | Heterozygous CTC subset of CPP |
| chr19 | 19136274 | T | T    | T    | Heterozygous CTC subset of CPP |
| chr19 | 19136393 | A | A    | A    | Heterozygous CTC subset of CPP |
| chr19 | 19136801 | C | C    | C    | Heterozygous CTC subset of CPP |
| chr19 | 19165012 | G | A,G  | G    | Heterozygous CTC subset of CPP |
| chr19 | 19230868 | A | A,G  | G    | Heterozygous CTC subset of CPP |
| chr19 | 29704002 | T | C,T  | C    | Heterozygous CTC subset of CPP |
| chr19 | 29704010 | A | A,C  | C    | Heterozygous CTC subset of CPP |
| chr19 | 30106159 | A | A    | A    | Heterozygous CTC subset of CPP |
| chr19 | 30500121 | A | A    | A    | Heterozygous CTC subset of CPP |
| chr19 | 30500143 | T | C,T  | C,T  | Heterozygous CTC subset of CPP |
| chr19 | 30500156 | G | G    | G    | Heterozygous CTC subset of CPP |
| chr19 | 30506517 | T | T    | T    | Heterozygous CTC subset of CPP |
| chr19 | 33106621 | C | C,T  | C    | Heterozygous CTC subset of CPP |
| chr19 | 34706203 | G | A,G  | G    | Heterozygous CTC subset of CPP |
| chr19 | 34868776 | T | C,T  | T    | Heterozygous CTC subset of CPP |
| chr19 | 34935987 | T | T    | T    | Heterozygous CTC subset of CPP |
| chr19 | 35500070 | T | T    | T    | Heterozygous CTC subset of CPP |
| chr19 | 35517018 | G | G    | G    | Heterozygous CTC subset of CPP |
| chr19 | 35741456 | T | C,T  | C    | Heterozygous CTC subset of CPP |
| chr19 | 35757427 | G | A,G  | G    | Heterozygous CTC subset of CPP |
| chr19 | 35758274 | T | G,T  | G,T  | Heterozygous CTC subset of CPP |
| chr19 | 35758275 | G | A,G  | A,G  | Heterozygous CTC subset of CPP |
| chr19 | 35758280 | A | A,G  | A,G  | Heterozygous CTC subset of CPP |
| chr19 | 35758283 | C | C    | C    | Heterozygous CTC subset of CPP |
| chr19 | 35758789 | A | +T,A | +T,A | Heterozygous CTC subset of CPP |
| chr19 | 35758790 | T | -T,T | T    | Heterozygous CTC subset of CPP |
| chr19 | 36106129 | A | A    | A    | Heterozygous CTC subset of CPP |
| chr19 | 36210997 | C | C    | C    | Heterozygous CTC subset of CPP |
| chr19 | 36216646 | G | G    | G    | Heterozygous CTC subset of CPP |
| chr19 | 36218158 | G | G    | G    | Heterozygous CTC subset of CPP |
| chr19 | 36224705 | A | A,G  | A    | Heterozygous CTC subset of CPP |
| chr19 | 36237765 | T | T    | T    | Heterozygous CTC subset of CPP |
| chr19 | 38782485 | G | C,G  | G    | Heterozygous CTC subset of CPP |

Grillet et al., Supplementary Table 5

|       |          |   |      |      |                                |
|-------|----------|---|------|------|--------------------------------|
| chr19 | 38795575 | A | A    | A    | Heterozygous CTC subset of CPP |
| chr19 | 38795581 | A | A    | A    | Heterozygous CTC subset of CPP |
| chr19 | 38798086 | T | C,T  | T    | Heterozygous CTC subset of CPP |
| chr19 | 38800176 | G | A,G  | G    | Heterozygous CTC subset of CPP |
| chr19 | 39196745 | C | C,T  | C,T  | Heterozygous CTC subset of CPP |
| chr19 | 39220182 | T | T    | T    | Heterozygous CTC subset of CPP |
| chr19 | 39220188 | G | G    | G    | Heterozygous CTC subset of CPP |
| chr19 | 39322087 | T | G,T  | G,T  | Heterozygous CTC subset of CPP |
| chr19 | 39329541 | T | T    | T    | Heterozygous CTC subset of CPP |
| chr19 | 39329549 | T | T    | T    | Heterozygous CTC subset of CPP |
| chr19 | 39330862 | A | A,G  | A    | Heterozygous CTC subset of CPP |
| chr19 | 39330868 | T | G,T  | G,T  | Heterozygous CTC subset of CPP |
| chr19 | 39331018 | T | T    | T    | Heterozygous CTC subset of CPP |
| chr19 | 39334651 | T | T    | T    | Heterozygous CTC subset of CPP |
| chr19 | 39336510 | T | T    | T    | Heterozygous CTC subset of CPP |
| chr19 | 39408462 | A | A    | A    | Heterozygous CTC subset of CPP |
| chr19 | 39868464 | G | G    | G    | Heterozygous CTC subset of CPP |
| chr19 | 39884273 | G | C,G  | G    | Heterozygous CTC subset of CPP |
| chr19 | 39914748 | G | A,G  | A,G  | Heterozygous CTC subset of CPP |
| chr19 | 39944082 | C | C,T  | C,T  | Heterozygous CTC subset of CPP |
| chr19 | 39972536 | G | A,G  | G    | Heterozygous CTC subset of CPP |
| chr19 | 40316568 | T | T    | T    | Heterozygous CTC subset of CPP |
| chr19 | 40325382 | C | A,C  | C    | Heterozygous CTC subset of CPP |
| chr19 | 40739513 | A | A,G  | A,G  | Heterozygous CTC subset of CPP |
| chr19 | 40929363 | T | C,T  | T    | Heterozygous CTC subset of CPP |
| chr19 | 40947751 | G | A,G  | G    | Heterozygous CTC subset of CPP |
| chr19 | 41095083 | C | C    | C    | Heterozygous CTC subset of CPP |
| chr19 | 41096316 | G | A,G  | G    | Heterozygous CTC subset of CPP |
| chr19 | 41263403 | A | A,G  | A    | Heterozygous CTC subset of CPP |
| chr19 | 41307170 | G | A,G  | G    | Heterozygous CTC subset of CPP |
| chr19 | 41798210 | A | A    | A    | Heterozygous CTC subset of CPP |
| chr19 | 41838066 | G | A,G  | G    | Heterozygous CTC subset of CPP |
| chr19 | 41850712 | A | A    | A    | Heterozygous CTC subset of CPP |
| chr19 | 42364843 | A | +C,A | +C,A | Heterozygous CTC subset of CPP |
| chr19 | 42375441 | A | A,G  | A,G  | Heterozygous CTC subset of CPP |
| chr19 | 42375449 | A | A    | A    | Heterozygous CTC subset of CPP |
| chr19 | 42375458 | T | T    | T    | Heterozygous CTC subset of CPP |
| chr19 | 42408532 | A | A    | A    | Heterozygous CTC subset of CPP |
| chr19 | 42461085 | T | T    | T    | Heterozygous CTC subset of CPP |
| chr19 | 42746465 | T | T    | T    | Heterozygous CTC subset of CPP |
| chr19 | 42746591 | G | G    | G    | Heterozygous CTC subset of CPP |
| chr19 | 42797391 | A | A    | A    | Heterozygous CTC subset of CPP |
| chr19 | 44096967 | T | T    | T    | Heterozygous CTC subset of CPP |
| chr19 | 45147340 | G | G,T  | G,T  | Heterozygous CTC subset of CPP |
| chr19 | 45147396 | C | C,T  | C,T  | Heterozygous CTC subset of CPP |
| chr19 | 45381534 | G | G    | G    | Heterozygous CTC subset of CPP |

Grillet et al., Supplementary Table 5

|       |          |   |      |      |                                |
|-------|----------|---|------|------|--------------------------------|
| chr19 | 45381637 | A | A    | A    | Heterozygous CTC subset of CPP |
| chr19 | 45395714 | T | C,T  | T    | Heterozygous CTC subset of CPP |
| chr19 | 45397307 | C | C,T  | C    | Heterozygous CTC subset of CPP |
| chr19 | 45404100 | A | A    | A    | Heterozygous CTC subset of CPP |
| chr19 | 45404101 | A | A    | A    | Heterozygous CTC subset of CPP |
| chr19 | 45490570 | A | A,G  | A,G  | Heterozygous CTC subset of CPP |
| chr19 | 45490636 | T | C,T  | C    | Heterozygous CTC subset of CPP |
| chr19 | 45645338 | T | T    | T    | Heterozygous CTC subset of CPP |
| chr19 | 45854210 | A | A    | A    | Heterozygous CTC subset of CPP |
| chr19 | 45854290 | T | T    | T    | Heterozygous CTC subset of CPP |
| chr19 | 45855524 | G | A,G  | A,G  | Heterozygous CTC subset of CPP |
| chr19 | 45899434 | T | T    | T    | Heterozygous CTC subset of CPP |
| chr19 | 45912491 | A | A    | A    | Heterozygous CTC subset of CPP |
| chr19 | 45912507 | G | G    | G    | Heterozygous CTC subset of CPP |
| chr19 | 45912509 | A | A    | A    | Heterozygous CTC subset of CPP |
| chr19 | 46011034 | G | G    | G    | Heterozygous CTC subset of CPP |
| chr19 | 46215293 | G | G    | G    | Heterozygous CTC subset of CPP |
| chr19 | 46282592 | T | T    | T    | Heterozygous CTC subset of CPP |
| chr19 | 46319415 | G | C,G  | G    | Heterozygous CTC subset of CPP |
| chr19 | 46321237 | A | A    | A    | Heterozygous CTC subset of CPP |
| chr19 | 46326655 | A | A    | A    | Heterozygous CTC subset of CPP |
| chr19 | 46857015 | C | C,T  | C    | Heterozygous CTC subset of CPP |
| chr19 | 47181656 | C | C    | C    | Heterozygous CTC subset of CPP |
| chr19 | 47207522 | G | G    | G    | Heterozygous CTC subset of CPP |
| chr19 | 47207848 | C | C    | C    | Heterozygous CTC subset of CPP |
| chr19 | 47282162 | G | A,G  | G    | Heterozygous CTC subset of CPP |
| chr19 | 47287817 | C | +T,C | +T,C | Heterozygous CTC subset of CPP |
| chr19 | 47287818 | T | C,T  | C,T  | Heterozygous CTC subset of CPP |
| chr19 | 47291174 | G | C,G  | C,G  | Heterozygous CTC subset of CPP |
| chr19 | 47349400 | C | +A,C | +A,C | Heterozygous CTC subset of CPP |
| chr19 | 47570896 | A | A    | A    | Heterozygous CTC subset of CPP |
| chr19 | 47570897 | A | A    | A    | Heterozygous CTC subset of CPP |
| chr19 | 47585517 | G | C,G  | G    | Heterozygous CTC subset of CPP |
| chr19 | 47588325 | G | A,G  | G    | Heterozygous CTC subset of CPP |
| chr19 | 47673177 | C | C    | C    | Heterozygous CTC subset of CPP |
| chr19 | 47768128 | G | C,G  | C    | Heterozygous CTC subset of CPP |
| chr19 | 47770015 | A | A,C  | C    | Heterozygous CTC subset of CPP |
| chr19 | 47856373 | A | A    | A    | Heterozygous CTC subset of CPP |
| chr19 | 47858414 | T | T    | T    | Heterozygous CTC subset of CPP |
| chr19 | 47858424 | G | A,G  | G    | Heterozygous CTC subset of CPP |
| chr19 | 48248834 | T | C,T  | T    | Heterozygous CTC subset of CPP |
| chr19 | 48253539 | A | A    | A    | Heterozygous CTC subset of CPP |
| chr19 | 48255804 | A | A,G  | A,G  | Heterozygous CTC subset of CPP |
| chr19 | 48255811 | G | A,G  | G    | Heterozygous CTC subset of CPP |
| chr19 | 48258772 | G | A    | A    | Heterozygous CTC subset of CPP |
| chr19 | 48260290 | T | T    | T    | Heterozygous CTC subset of CPP |

Grillet et al., Supplementary Table 5

|       |          |   |       |      |                                |
|-------|----------|---|-------|------|--------------------------------|
| chr19 | 48630539 | C | C,T   | C    | Heterozygous CTC subset of CPP |
| chr19 | 48640902 | G | A,G   | G    | Heterozygous CTC subset of CPP |
| chr19 | 48949286 | G | G,T   | T    | Heterozygous CTC subset of CPP |
| chr19 | 48981327 | G | G     | G    | Heterozygous CTC subset of CPP |
| chr19 | 49120574 | A | A,T   | A    | Heterozygous CTC subset of CPP |
| chr19 | 49302995 | A | A     | A    | Heterozygous CTC subset of CPP |
| chr19 | 49303070 | G | C,G   | C,G  | Heterozygous CTC subset of CPP |
| chr19 | 49376557 | T | T     | T    | Heterozygous CTC subset of CPP |
| chr19 | 49376582 | G | A,G   | A    | Heterozygous CTC subset of CPP |
| chr19 | 49377086 | T | C,T   | C,T  | Heterozygous CTC subset of CPP |
| chr19 | 49377242 | G | C,G   | C    | Heterozygous CTC subset of CPP |
| chr19 | 49377424 | G | A,G   | G    | Heterozygous CTC subset of CPP |
| chr19 | 49377873 | G | A,G   | G    | Heterozygous CTC subset of CPP |
| chr19 | 49377918 | G | G,T   | G    | Heterozygous CTC subset of CPP |
| chr19 | 49407660 | G | A,G   | G    | Heterozygous CTC subset of CPP |
| chr19 | 49458807 | C | C,G   | C    | Heterozygous CTC subset of CPP |
| chr19 | 49468865 | T | T     | T    | Heterozygous CTC subset of CPP |
| chr19 | 49484893 | C | C     | C    | Heterozygous CTC subset of CPP |
| chr19 | 49513273 | C | C,T   | C,T  | Heterozygous CTC subset of CPP |
| chr19 | 49611319 | C | C,T   | C    | Heterozygous CTC subset of CPP |
| chr19 | 49854622 | A | A     | A    | Heterozygous CTC subset of CPP |
| chr19 | 50000583 | G | G     | G    | Heterozygous CTC subset of CPP |
| chr19 | 50100874 | G | A,G   | G    | Heterozygous CTC subset of CPP |
| chr19 | 50118214 | T | T     | T    | Heterozygous CTC subset of CPP |
| chr19 | 50149882 | G | +AA,G | G    | Heterozygous CTC subset of CPP |
| chr19 | 50154259 | T | T     | T    | Heterozygous CTC subset of CPP |
| chr19 | 50155367 | C | C     | C    | Heterozygous CTC subset of CPP |
| chr19 | 50189982 | A | +C,A  | +C,A | Heterozygous CTC subset of CPP |
| chr19 | 50189985 | T | G     | G    | Heterozygous CTC subset of CPP |
| chr19 | 50285246 | G | G     | G    | Heterozygous CTC subset of CPP |
| chr19 | 50302209 | G | +T,G  | +T,G | Heterozygous CTC subset of CPP |
| chr19 | 50302748 | T | T     | T    | Heterozygous CTC subset of CPP |
| chr19 | 50338792 | T | T     | T    | Heterozygous CTC subset of CPP |
| chr19 | 50339003 | A | A     | A    | Heterozygous CTC subset of CPP |
| chr19 | 50339196 | A | A     | A    | Heterozygous CTC subset of CPP |
| chr19 | 50360301 | A | A     | A    | Heterozygous CTC subset of CPP |
| chr19 | 50370367 | A | A     | A    | Heterozygous CTC subset of CPP |
| chr19 | 50410795 | T | T     | T    | Heterozygous CTC subset of CPP |
| chr19 | 50411742 | A | A,G   | G    | Heterozygous CTC subset of CPP |
| chr19 | 50412217 | C | C,G   | C,G  | Heterozygous CTC subset of CPP |
| chr19 | 50412417 | G | A,G   | A,G  | Heterozygous CTC subset of CPP |
| chr19 | 50492973 | A | A     | A    | Heterozygous CTC subset of CPP |
| chr19 | 50496151 | T | T     | T    | Heterozygous CTC subset of CPP |
| chr19 | 50498532 | A | A     | A    | Heterozygous CTC subset of CPP |
| chr19 | 50504058 | A | A     | A    | Heterozygous CTC subset of CPP |
| chr19 | 50902640 | C | C,T   | C    | Heterozygous CTC subset of CPP |

Grillet et al., Supplementary Table 5

|       |          |   |        |        |                                |
|-------|----------|---|--------|--------|--------------------------------|
| chr19 | 50905042 | G | A,G    | G      | Heterozygous CTC subset of CPP |
| chr19 | 50905074 | G | A,G    | G      | Heterozygous CTC subset of CPP |
| chr19 | 50910670 | A | A      | A      | Heterozygous CTC subset of CPP |
| chr19 | 50985464 | G | G      | G      | Heterozygous CTC subset of CPP |
| chr19 | 50985466 | G | G      | G      | Heterozygous CTC subset of CPP |
| chr19 | 51301395 | C | C,T    | C      | Heterozygous CTC subset of CPP |
| chr19 | 51301456 | G | A,G    | G      | Heterozygous CTC subset of CPP |
| chr19 | 51462443 | G | G      | G      | Heterozygous CTC subset of CPP |
| chr19 | 51607643 | T | T      | T      | Heterozygous CTC subset of CPP |
| chr19 | 54628014 | C | C,T    | C      | Heterozygous CTC subset of CPP |
| chr19 | 54662043 | C | C,T    | C      | Heterozygous CTC subset of CPP |
| chr19 | 54684489 | C | -C,C   | -C,C   | Heterozygous CTC subset of CPP |
| chr19 | 54691062 | T | A,T    | T      | Heterozygous CTC subset of CPP |
| chr19 | 54711268 | T | T      | T      | Heterozygous CTC subset of CPP |
| chr19 | 54972310 | A | A      | A      | Heterozygous CTC subset of CPP |
| chr19 | 54972311 | T | T      | T      | Heterozygous CTC subset of CPP |
| chr19 | 55790886 | A | A      | A      | Heterozygous CTC subset of CPP |
| chr19 | 55902923 | A | A      | A      | Heterozygous CTC subset of CPP |
| chr19 | 55967848 | C | C,T    | C,T    | Heterozygous CTC subset of CPP |
| chr19 | 56090220 | C | C      | C      | Heterozygous CTC subset of CPP |
| chr19 | 56125048 | G | G      | G      | Heterozygous CTC subset of CPP |
| chr19 | 56170661 | C | C,T    | C      | Heterozygous CTC subset of CPP |
| chr19 | 56599438 | T | T      | T      | Heterozygous CTC subset of CPP |
| chr19 | 56599440 | G | C,G    | C,G    | Heterozygous CTC subset of CPP |
| chr19 | 56599452 | G | C,G    | C,G    | Heterozygous CTC subset of CPP |
| chr19 | 56599462 | T | T      | T      | Heterozygous CTC subset of CPP |
| chr19 | 56669951 | A | A      | A      | Heterozygous CTC subset of CPP |
| chr19 | 58904551 | A | A      | A      | Heterozygous CTC subset of CPP |
| chr19 | 59059729 | G | A,G    | G      | Heterozygous CTC subset of CPP |
| chr19 | 59061019 | T | -T,G,T | -T,G,T | Heterozygous CTC subset of CPP |
| chr2  | 272150   | G | G      | G      | Heterozygous CTC subset of CPP |
| chr2  | 3197915  | C | C      | C      | Heterozygous CTC subset of CPP |
| chr2  | 3391527  | T | T      | T      | Heterozygous CTC subset of CPP |
| chr2  | 3391826  | C | C,T    | C      | Heterozygous CTC subset of CPP |
| chr2  | 3392075  | T | C,T    | T      | Heterozygous CTC subset of CPP |
| chr2  | 3481543  | T | T      | T      | Heterozygous CTC subset of CPP |
| chr2  | 3504687  | A | A,G    | A,G    | Heterozygous CTC subset of CPP |
| chr2  | 9463354  | G | G      | G      | Heterozygous CTC subset of CPP |
| chr2  | 9517122  | G | G      | G      | Heterozygous CTC subset of CPP |
| chr2  | 9546955  | T | T      | T      | Heterozygous CTC subset of CPP |
| chr2  | 9558805  | G | G      | G      | Heterozygous CTC subset of CPP |
| chr2  | 9593062  | C | C      | C      | Heterozygous CTC subset of CPP |
| chr2  | 9597142  | A | A      | A      | Heterozygous CTC subset of CPP |
| chr2  | 9658062  | T | T      | T      | Heterozygous CTC subset of CPP |
| chr2  | 9667965  | T | T      | T      | Heterozygous CTC subset of CPP |
| chr2  | 10262920 | T | G,T    | G,T    | Heterozygous CTC subset of CPP |

Grillet et al., Supplementary Table 5

|      |          |   |      |      |                                |
|------|----------|---|------|------|--------------------------------|
| chr2 | 10717806 | C | C,T  | C    | Heterozygous CTC subset of CPP |
| chr2 | 10815984 | A | A    | A    | Heterozygous CTC subset of CPP |
| chr2 | 10829929 | A | A    | A    | Heterozygous CTC subset of CPP |
| chr2 | 10930903 | T | C,T  | T    | Heterozygous CTC subset of CPP |
| chr2 | 10933249 | C | C,T  | C,T  | Heterozygous CTC subset of CPP |
| chr2 | 10942687 | C | C,T  | T    | Heterozygous CTC subset of CPP |
| chr2 | 10952800 | C | +A,C | +A,C | Heterozygous CTC subset of CPP |
| chr2 | 10952801 | T | G    | G    | Heterozygous CTC subset of CPP |
| chr2 | 11376024 | T | T    | T    | Heterozygous CTC subset of CPP |
| chr2 | 11484238 | T | T    | T    | Heterozygous CTC subset of CPP |
| chr2 | 15735648 | T | C,T  | T    | Heterozygous CTC subset of CPP |
| chr2 | 15737558 | C | C    | C    | Heterozygous CTC subset of CPP |
| chr2 | 15747393 | C | C,T  | C,T  | Heterozygous CTC subset of CPP |
| chr2 | 15767263 | A | A,G  | A    | Heterozygous CTC subset of CPP |
| chr2 | 20402090 | C | C    | C    | Heterozygous CTC subset of CPP |
| chr2 | 20403949 | C | C    | C    | Heterozygous CTC subset of CPP |
| chr2 | 20647358 | C | C    | C    | Heterozygous CTC subset of CPP |
| chr2 | 20647394 | G | G    | G    | Heterozygous CTC subset of CPP |
| chr2 | 24290671 | G | A,G  | G    | Heterozygous CTC subset of CPP |
| chr2 | 24291241 | A | A    | A    | Heterozygous CTC subset of CPP |
| chr2 | 25046090 | T | C,T  | C,T  | Heterozygous CTC subset of CPP |
| chr2 | 25050977 | T | C,T  | C,T  | Heterozygous CTC subset of CPP |
| chr2 | 25141538 | A | A,G  | G    | Heterozygous CTC subset of CPP |
| chr2 | 26507071 | C | C    | C    | Heterozygous CTC subset of CPP |
| chr2 | 26590084 | T | G,T  | G,T  | Heterozygous CTC subset of CPP |
| chr2 | 27255864 | A | A    | A    | Heterozygous CTC subset of CPP |
| chr2 | 27260469 | G | A,G  | A,G  | Heterozygous CTC subset of CPP |
| chr2 | 27263362 | C | C    | C    | Heterozygous CTC subset of CPP |
| chr2 | 27324571 | T | T    | T    | Heterozygous CTC subset of CPP |
| chr2 | 27324751 | G | G,T  | G    | Heterozygous CTC subset of CPP |
| chr2 | 27355203 | A | A    | A    | Heterozygous CTC subset of CPP |
| chr2 | 27424636 | G | A,G  | A    | Heterozygous CTC subset of CPP |
| chr2 | 27460645 | T | T    | T    | Heterozygous CTC subset of CPP |
| chr2 | 27534782 | A | A    | A    | Heterozygous CTC subset of CPP |
| chr2 | 27550967 | A | A,G  | A    | Heterozygous CTC subset of CPP |
| chr2 | 27551711 | C | C    | C    | Heterozygous CTC subset of CPP |
| chr2 | 27566176 | T | T    | T    | Heterozygous CTC subset of CPP |
| chr2 | 27603016 | T | T    | T    | Heterozygous CTC subset of CPP |
| chr2 | 27851918 | G | A,G  | A    | Heterozygous CTC subset of CPP |
| chr2 | 27852752 | A | A    | A    | Heterozygous CTC subset of CPP |
| chr2 | 27885102 | C | C    | C    | Heterozygous CTC subset of CPP |
| chr2 | 27888070 | A | A    | A    | Heterozygous CTC subset of CPP |
| chr2 | 28002302 | A | A,C  | A    | Heterozygous CTC subset of CPP |
| chr2 | 28152735 | A | A    | A    | Heterozygous CTC subset of CPP |
| chr2 | 29001691 | A | A,G  | A,G  | Heterozygous CTC subset of CPP |
| chr2 | 29092850 | G | G,T  | G,T  | Heterozygous CTC subset of CPP |

Grillet et al., Supplementary Table 5

|      |          |   |        |        |                                |
|------|----------|---|--------|--------|--------------------------------|
| chr2 | 29092866 | A | A      | A      | Heterozygous CTC subset of CPP |
| chr2 | 29135468 | C | C,G    | C,G    | Heterozygous CTC subset of CPP |
| chr2 | 29152456 | A | A,G    | G      | Heterozygous CTC subset of CPP |
| chr2 | 29169612 | T | C,T    | C,T    | Heterozygous CTC subset of CPP |
| chr2 | 32530689 | T | T      | T      | Heterozygous CTC subset of CPP |
| chr2 | 33820704 | A | +C,A   | +C,A   | Heterozygous CTC subset of CPP |
| chr2 | 36805879 | A | A      | A      | Heterozygous CTC subset of CPP |
| chr2 | 37438176 | A | A      | A      | Heterozygous CTC subset of CPP |
| chr2 | 37438993 | G | A,G    | G      | Heterozygous CTC subset of CPP |
| chr2 | 37458711 | G | A,G    | G      | Heterozygous CTC subset of CPP |
| chr2 | 37475360 | T | T      | T      | Heterozygous CTC subset of CPP |
| chr2 | 37518045 | G | C,G    | G      | Heterozygous CTC subset of CPP |
| chr2 | 38536626 | T | G,T    | T      | Heterozygous CTC subset of CPP |
| chr2 | 38604351 | A | A,G    | A      | Heterozygous CTC subset of CPP |
| chr2 | 38796961 | T | T      | T      | Heterozygous CTC subset of CPP |
| chr2 | 42396722 | A | A,G    | A,G    | Heterozygous CTC subset of CPP |
| chr2 | 42483769 | A | A      | A      | Heterozygous CTC subset of CPP |
| chr2 | 42515388 | A | A,G    | G      | Heterozygous CTC subset of CPP |
| chr2 | 42515437 | A | A,G    | A,G    | Heterozygous CTC subset of CPP |
| chr2 | 42522390 | A | A      | A      | Heterozygous CTC subset of CPP |
| chr2 | 42531690 | A | A      | A      | Heterozygous CTC subset of CPP |
| chr2 | 42836723 | A | A      | A      | Heterozygous CTC subset of CPP |
| chr2 | 42871340 | T | T      | T      | Heterozygous CTC subset of CPP |
| chr2 | 42883358 | A | A      | A      | Heterozygous CTC subset of CPP |
| chr2 | 42922953 | A | A      | A      | Heterozygous CTC subset of CPP |
| chr2 | 43452183 | A | A,G    | A,G    | Heterozygous CTC subset of CPP |
| chr2 | 44209477 | C | C,T    | T      | Heterozygous CTC subset of CPP |
| chr2 | 44428943 | T | T      | T      | Heterozygous CTC subset of CPP |
| chr2 | 44550421 | A | A      | A      | Heterozygous CTC subset of CPP |
| chr2 | 44569608 | T | T      | T      | Heterozygous CTC subset of CPP |
| chr2 | 47134978 | A | A      | A      | Heterozygous CTC subset of CPP |
| chr2 | 47388998 | C | +T,C   | +T,C   | Heterozygous CTC subset of CPP |
| chr2 | 47403578 | A | A      | A      | Heterozygous CTC subset of CPP |
| chr2 | 47403579 | C | +C,C,G | +C,C,G | Heterozygous CTC subset of CPP |
| chr2 | 47601106 | T | C,T    | C,T    | Heterozygous CTC subset of CPP |
| chr2 | 47604216 | G | -G,G   | -G,G   | Heterozygous CTC subset of CPP |
| chr2 | 47606175 | T | T      | T      | Heterozygous CTC subset of CPP |
| chr2 | 47635542 | G | A,G    | G      | Heterozygous CTC subset of CPP |
| chr2 | 48025764 | C | C,T    | C,T    | Heterozygous CTC subset of CPP |
| chr2 | 48025785 | A | A,C    | A      | Heterozygous CTC subset of CPP |
| chr2 | 48026486 | A | A      | A      | Heterozygous CTC subset of CPP |
| chr2 | 48033663 | G | G      | G      | Heterozygous CTC subset of CPP |
| chr2 | 48033698 | A | A      | A      | Heterozygous CTC subset of CPP |
| chr2 | 48059584 | A | A      | A      | Heterozygous CTC subset of CPP |
| chr2 | 54041709 | A | A      | A      | Heterozygous CTC subset of CPP |
| chr2 | 54115904 | A | A,G    | A,G    | Heterozygous CTC subset of CPP |



Grillet et al., Supplementary Table 5

|      |          |   |      |      |                                |
|------|----------|---|------|------|--------------------------------|
| chr2 | 54120025 | A | A,T  | A,T  | Heterozygous CTC subset of CPP |
| chr2 | 54120820 | G | A,G  | A    | Heterozygous CTC subset of CPP |
| chr2 | 54127041 | C | C,T  | T    | Heterozygous CTC subset of CPP |
| chr2 | 54161776 | A | A    | A    | Heterozygous CTC subset of CPP |
| chr2 | 54839325 | A | A    | A    | Heterozygous CTC subset of CPP |
| chr2 | 54849570 | T | T    | T    | Heterozygous CTC subset of CPP |
| chr2 | 54856470 | G | A,G  | G    | Heterozygous CTC subset of CPP |
| chr2 | 54858511 | C | C,T  | C    | Heterozygous CTC subset of CPP |
| chr2 | 54874398 | G | -G,G | -G,G | Heterozygous CTC subset of CPP |
| chr2 | 55459941 | C | C    | C    | Heterozygous CTC subset of CPP |
| chr2 | 55459942 | A | A    | A    | Heterozygous CTC subset of CPP |
| chr2 | 55462669 | A | A    | A    | Heterozygous CTC subset of CPP |
| chr2 | 55462741 | T | T    | T    | Heterozygous CTC subset of CPP |
| chr2 | 55476591 | G | A,G  | G    | Heterozygous CTC subset of CPP |
| chr2 | 55749261 | A | A    | A    | Heterozygous CTC subset of CPP |
| chr2 | 55749270 | T | T    | T    | Heterozygous CTC subset of CPP |
| chr2 | 55771161 | A | A,G  | G    | Heterozygous CTC subset of CPP |
| chr2 | 55825667 | A | A    | A    | Heterozygous CTC subset of CPP |
| chr2 | 55831126 | T | T    | T    | Heterozygous CTC subset of CPP |
| chr2 | 55863390 | T | T    | T    | Heterozygous CTC subset of CPP |
| chr2 | 55883317 | G | G,T  | G    | Heterozygous CTC subset of CPP |
| chr2 | 55912120 | T | C,T  | T    | Heterozygous CTC subset of CPP |
| chr2 | 58386880 | C | C,T  | C    | Heterozygous CTC subset of CPP |
| chr2 | 61275771 | C | C,G  | C    | Heterozygous CTC subset of CPP |
| chr2 | 61408540 | G | G    | G    | Heterozygous CTC subset of CPP |
| chr2 | 61411906 | A | A    | A    | Heterozygous CTC subset of CPP |
| chr2 | 61415494 | C | C    | C    | Heterozygous CTC subset of CPP |
| chr2 | 61415520 | A | A    | A    | Heterozygous CTC subset of CPP |
| chr2 | 61433216 | A | A    | A    | Heterozygous CTC subset of CPP |
| chr2 | 62103368 | A | A    | A    | Heterozygous CTC subset of CPP |
| chr2 | 62449865 | C | C,T  | C    | Heterozygous CTC subset of CPP |
| chr2 | 62449975 | A | A    | A    | Heterozygous CTC subset of CPP |
| chr2 | 62450418 | A | A    | A    | Heterozygous CTC subset of CPP |
| chr2 | 64779809 | A | A    | A    | Heterozygous CTC subset of CPP |
| chr2 | 65473862 | A | A    | A    | Heterozygous CTC subset of CPP |
| chr2 | 65540701 | A | A    | A    | Heterozygous CTC subset of CPP |
| chr2 | 65540905 | C | C,G  | C,G  | Heterozygous CTC subset of CPP |
| chr2 | 68385097 | A | A,G  | G    | Heterozygous CTC subset of CPP |
| chr2 | 68388823 | A | A,G  | G    | Heterozygous CTC subset of CPP |
| chr2 | 68389795 | T | T    | T    | Heterozygous CTC subset of CPP |
| chr2 | 68408142 | C | C    | C    | Heterozygous CTC subset of CPP |
| chr2 | 68415767 | G | A,G  | A    | Heterozygous CTC subset of CPP |
| chr2 | 69627501 | C | A,C  | C    | Heterozygous CTC subset of CPP |
| chr2 | 70033584 | C | C,T  | C    | Heterozygous CTC subset of CPP |
| chr2 | 70130323 | T | T    | T    | Heterozygous CTC subset of CPP |
| chr2 | 70315692 | A | A    | A    | Heterozygous CTC subset of CPP |

Grillet et al., Supplementary Table 5

|      |          |   |       |      |                                |
|------|----------|---|-------|------|--------------------------------|
| chr2 | 70441604 | T | T     | T    | Heterozygous CTC subset of CPP |
| chr2 | 70515201 | A | A     | A    | Heterozygous CTC subset of CPP |
| chr2 | 70524577 | G | G     | G    | Heterozygous CTC subset of CPP |
| chr2 | 71360282 | G | A,G   | G    | Heterozygous CTC subset of CPP |
| chr2 | 71429649 | T | T     | T    | Heterozygous CTC subset of CPP |
| chr2 | 71592743 | A | A     | A    | Heterozygous CTC subset of CPP |
| chr2 | 71592744 | C | C     | C    | Heterozygous CTC subset of CPP |
| chr2 | 71607407 | T | +AA,T | T    | Heterozygous CTC subset of CPP |
| chr2 | 71650440 | G | G     | G    | Heterozygous CTC subset of CPP |
| chr2 | 71650850 | T | T     | T    | Heterozygous CTC subset of CPP |
| chr2 | 71650856 | A | A     | A    | Heterozygous CTC subset of CPP |
| chr2 | 71653783 | A | A     | A    | Heterozygous CTC subset of CPP |
| chr2 | 71654006 | T | T     | T    | Heterozygous CTC subset of CPP |
| chr2 | 71654450 | A | A     | A    | Heterozygous CTC subset of CPP |
| chr2 | 71658541 | C | C,T   | C    | Heterozygous CTC subset of CPP |
| chr2 | 71660348 | T | T     | T    | Heterozygous CTC subset of CPP |
| chr2 | 71661939 | T | T     | T    | Heterozygous CTC subset of CPP |
| chr2 | 73957124 | A | A,G   | A,G  | Heterozygous CTC subset of CPP |
| chr2 | 74185876 | A | A,T   | T    | Heterozygous CTC subset of CPP |
| chr2 | 74383630 | G | A,G   | G    | Heterozygous CTC subset of CPP |
| chr2 | 74588405 | A | A     | A    | Heterozygous CTC subset of CPP |
| chr2 | 74651058 | T | T     | T    | Heterozygous CTC subset of CPP |
| chr2 | 74689556 | A | A     | A    | Heterozygous CTC subset of CPP |
| chr2 | 74689802 | A | A     | A    | Heterozygous CTC subset of CPP |
| chr2 | 74692191 | C | C,T   | C    | Heterozygous CTC subset of CPP |
| chr2 | 74692238 | A | A     | A    | Heterozygous CTC subset of CPP |
| chr2 | 75116527 | G | G     | G    | Heterozygous CTC subset of CPP |
| chr2 | 75185856 | G | G,T   | G    | Heterozygous CTC subset of CPP |
| chr2 | 75874015 | C | C,G   | C    | Heterozygous CTC subset of CPP |
| chr2 | 75882399 | G | A,G   | G    | Heterozygous CTC subset of CPP |
| chr2 | 85133510 | C | C,G   | C,G  | Heterozygous CTC subset of CPP |
| chr2 | 85133512 | G | +A,G  | +A,G | Heterozygous CTC subset of CPP |
| chr2 | 85553784 | C | C,T   | C    | Heterozygous CTC subset of CPP |
| chr2 | 85769711 | C | C,G   | C    | Heterozygous CTC subset of CPP |
| chr2 | 85806266 | C | C     | C    | Heterozygous CTC subset of CPP |
| chr2 | 85808737 | A | A,G   | A    | Heterozygous CTC subset of CPP |
| chr2 | 85824039 | G | A,G   | G    | Heterozygous CTC subset of CPP |
| chr2 | 85836157 | A | A     | A    | Heterozygous CTC subset of CPP |
| chr2 | 85843348 | C | C,T   | C    | Heterozygous CTC subset of CPP |
| chr2 | 86258544 | T | T     | T    | Heterozygous CTC subset of CPP |
| chr2 | 86259443 | C | C,T   | T    | Heterozygous CTC subset of CPP |
| chr2 | 86371883 | T | C,T   | C    | Heterozygous CTC subset of CPP |
| chr2 | 86400824 | G | A,G   | G    | Heterozygous CTC subset of CPP |
| chr2 | 86831404 | T | T     | T    | Heterozygous CTC subset of CPP |
| chr2 | 86839307 | T | T     | T    | Heterozygous CTC subset of CPP |
| chr2 | 86979093 | G | A,G   | A    | Heterozygous CTC subset of CPP |

Grillet et al., Supplementary Table 5

|      |           |   |     |     |                                |
|------|-----------|---|-----|-----|--------------------------------|
| chr2 | 95775761  | G | A,G | G   | Heterozygous CTC subset of CPP |
| chr2 | 96944553  | G | A,G | A,G | Heterozygous CTC subset of CPP |
| chr2 | 97009936  | T | T   | T   | Heterozygous CTC subset of CPP |
| chr2 | 97019135  | G | G   | G   | Heterozygous CTC subset of CPP |
| chr2 | 97498663  | A | A   | A   | Heterozygous CTC subset of CPP |
| chr2 | 98274527  | G | C,G | C,G | Heterozygous CTC subset of CPP |
| chr2 | 99234700  | T | T   | T   | Heterozygous CTC subset of CPP |
| chr2 | 99234710  | A | A   | A   | Heterozygous CTC subset of CPP |
| chr2 | 99785855  | G | G   | G   | Heterozygous CTC subset of CPP |
| chr2 | 99804642  | T | C,T | C,T | Heterozygous CTC subset of CPP |
| chr2 | 99812070  | G | A,G | A,G | Heterozygous CTC subset of CPP |
| chr2 | 99977673  | C | C   | C   | Heterozygous CTC subset of CPP |
| chr2 | 99992822  | A | A,C | A,C | Heterozygous CTC subset of CPP |
| chr2 | 99995804  | T | C,T | C,T | Heterozygous CTC subset of CPP |
| chr2 | 101125942 | T | T   | T   | Heterozygous CTC subset of CPP |
| chr2 | 101186088 | C | C,T | C   | Heterozygous CTC subset of CPP |
| chr2 | 101622526 | T | T   | T   | Heterozygous CTC subset of CPP |
| chr2 | 101869588 | G | G,T | T   | Heterozygous CTC subset of CPP |
| chr2 | 101869820 | T | T   | T   | Heterozygous CTC subset of CPP |
| chr2 | 101905515 | T | T   | T   | Heterozygous CTC subset of CPP |
| chr2 | 102314999 | A | A   | A   | Heterozygous CTC subset of CPP |
| chr2 | 102486877 | G | G   | G   | Heterozygous CTC subset of CPP |
| chr2 | 102501711 | T | T   | T   | Heterozygous CTC subset of CPP |
| chr2 | 102505361 | T | T   | T   | Heterozygous CTC subset of CPP |
| chr2 | 105665808 | C | C,T | C   | Heterozygous CTC subset of CPP |
| chr2 | 105705507 | C | C,T | C   | Heterozygous CTC subset of CPP |
| chr2 | 105708997 | G | A,G | G   | Heterozygous CTC subset of CPP |
| chr2 | 105713697 | A | A,G | A   | Heterozygous CTC subset of CPP |
| chr2 | 106013147 | C | C,T | C   | Heterozygous CTC subset of CPP |
| chr2 | 106498024 | A | A   | A   | Heterozygous CTC subset of CPP |
| chr2 | 106746145 | T | T   | T   | Heterozygous CTC subset of CPP |
| chr2 | 106761657 | A | A   | A   | Heterozygous CTC subset of CPP |
| chr2 | 109088355 | T | T   | T   | Heterozygous CTC subset of CPP |
| chr2 | 109381155 | G | G   | G   | Heterozygous CTC subset of CPP |
| chr2 | 109384188 | C | C   | C   | Heterozygous CTC subset of CPP |
| chr2 | 109399014 | T | T   | T   | Heterozygous CTC subset of CPP |
| chr2 | 109399147 | G | G   | G   | Heterozygous CTC subset of CPP |
| chr2 | 109400264 | T | T   | T   | Heterozygous CTC subset of CPP |
| chr2 | 110373197 | G | A,G | A,G | Heterozygous CTC subset of CPP |
| chr2 | 110373361 | T | T   | T   | Heterozygous CTC subset of CPP |
| chr2 | 113332575 | T | T   | T   | Heterozygous CTC subset of CPP |
| chr2 | 113333084 | A | A   | A   | Heterozygous CTC subset of CPP |
| chr2 | 113343881 | T | T   | T   | Heterozygous CTC subset of CPP |
| chr2 | 113416434 | T | T   | T   | Heterozygous CTC subset of CPP |
| chr2 | 113417979 | T | T   | T   | Heterozygous CTC subset of CPP |
| chr2 | 114220055 | T | C,T | T   | Heterozygous CTC subset of CPP |

Grillet et al., Supplementary Table 5

|      |           |   |      |      |                                |
|------|-----------|---|------|------|--------------------------------|
| chr2 | 114713268 | A | A    | A    | Heterozygous CTC subset of CPP |
| chr2 | 118575215 | C | C,G  | C,G  | Heterozygous CTC subset of CPP |
| chr2 | 118578801 | A | A    | A    | Heterozygous CTC subset of CPP |
| chr2 | 118583940 | C | C,T  | C    | Heterozygous CTC subset of CPP |
| chr2 | 118864765 | G | G    | G    | Heterozygous CTC subset of CPP |
| chr2 | 120438603 | T | T    | T    | Heterozygous CTC subset of CPP |
| chr2 | 121036333 | G | G    | G    | Heterozygous CTC subset of CPP |
| chr2 | 122485308 | T | T    | T    | Heterozygous CTC subset of CPP |
| chr2 | 127826533 | A | A,G  | A    | Heterozygous CTC subset of CPP |
| chr2 | 128046966 | T | T    | T    | Heterozygous CTC subset of CPP |
| chr2 | 128255813 | C | +T,C | +T,C | Heterozygous CTC subset of CPP |
| chr2 | 128263054 | T | T    | T    | Heterozygous CTC subset of CPP |
| chr2 | 128263127 | T | T    | T    | Heterozygous CTC subset of CPP |
| chr2 | 128263256 | A | A    | A    | Heterozygous CTC subset of CPP |
| chr2 | 128463981 | A | A,C  | A    | Heterozygous CTC subset of CPP |
| chr2 | 128484254 | A | A    | A    | Heterozygous CTC subset of CPP |
| chr2 | 128522843 | A | A    | A    | Heterozygous CTC subset of CPP |
| chr2 | 128631565 | C | C,G  | C    | Heterozygous CTC subset of CPP |
| chr2 | 128878005 | A | A    | A    | Heterozygous CTC subset of CPP |
| chr2 | 128939817 | G | A,G  | A    | Heterozygous CTC subset of CPP |
| chr2 | 128944300 | T | T    | T    | Heterozygous CTC subset of CPP |
| chr2 | 130910423 | T | T    | T    | Heterozygous CTC subset of CPP |
| chr2 | 130912742 | G | G    | G    | Heterozygous CTC subset of CPP |
| chr2 | 131100496 | G | A,G  | G    | Heterozygous CTC subset of CPP |
| chr2 | 131100734 | G | A,G  | G    | Heterozygous CTC subset of CPP |
| chr2 | 131103143 | C | C    | C    | Heterozygous CTC subset of CPP |
| chr2 | 132120863 | T | T    | T    | Heterozygous CTC subset of CPP |
| chr2 | 135028029 | A | A    | A    | Heterozygous CTC subset of CPP |
| chr2 | 135099229 | T | T    | T    | Heterozygous CTC subset of CPP |
| chr2 | 135206375 | A | A    | A    | Heterozygous CTC subset of CPP |
| chr2 | 135887654 | A | A    | A    | Heterozygous CTC subset of CPP |
| chr2 | 135893372 | A | A,G  | G    | Heterozygous CTC subset of CPP |
| chr2 | 135911422 | T | C,T  | C    | Heterozygous CTC subset of CPP |
| chr2 | 136362391 | T | A,T  | T    | Heterozygous CTC subset of CPP |
| chr2 | 136396681 | T | T    | T    | Heterozygous CTC subset of CPP |
| chr2 | 136481743 | T | T    | T    | Heterozygous CTC subset of CPP |
| chr2 | 136511817 | A | A,G  | G    | Heterozygous CTC subset of CPP |
| chr2 | 136540370 | G | C,G  | G    | Heterozygous CTC subset of CPP |
| chr2 | 148716428 | T | C,T  | T    | Heterozygous CTC subset of CPP |
| chr2 | 150432289 | G | +T,G | G    | Heterozygous CTC subset of CPP |
| chr2 | 152684704 | A | +C,A | +C,A | Heterozygous CTC subset of CPP |
| chr2 | 153475502 | A | A    | A    | Heterozygous CTC subset of CPP |
| chr2 | 153519684 | T | +A,T | +A,T | Heterozygous CTC subset of CPP |
| chr2 | 153532940 | G | G    | G    | Heterozygous CTC subset of CPP |
| chr2 | 153533260 | G | A,G  | G    | Heterozygous CTC subset of CPP |
| chr2 | 153575400 | A | A    | A    | Heterozygous CTC subset of CPP |

Grillet et al., Supplementary Table 5

|      |           |   |     |     |                                |
|------|-----------|---|-----|-----|--------------------------------|
| chr2 | 157427789 | T | T   | T   | Heterozygous CTC subset of CPP |
| chr2 | 159481765 | T | T   | T   | Heterozygous CTC subset of CPP |
| chr2 | 159519553 | T | T   | T   | Heterozygous CTC subset of CPP |
| chr2 | 159523063 | A | A   | A   | Heterozygous CTC subset of CPP |
| chr2 | 159526418 | G | G   | G   | Heterozygous CTC subset of CPP |
| chr2 | 160599717 | C | C,G | C   | Heterozygous CTC subset of CPP |
| chr2 | 160599764 | G | G   | G   | Heterozygous CTC subset of CPP |
| chr2 | 160604452 | C | C   | C   | Heterozygous CTC subset of CPP |
| chr2 | 160604812 | C | C,T | C,T | Heterozygous CTC subset of CPP |
| chr2 | 168997188 | A | A   | A   | Heterozygous CTC subset of CPP |
| chr2 | 169574474 | T | T   | T   | Heterozygous CTC subset of CPP |
| chr2 | 170471001 | T | T   | T   | Heterozygous CTC subset of CPP |
| chr2 | 170471097 | A | A   | A   | Heterozygous CTC subset of CPP |
| chr2 | 170489755 | A | A   | A   | Heterozygous CTC subset of CPP |
| chr2 | 170489757 | G | G   | G   | Heterozygous CTC subset of CPP |
| chr2 | 170493103 | T | A,T | A   | Heterozygous CTC subset of CPP |
| chr2 | 170493863 | A | A,G | A,G | Heterozygous CTC subset of CPP |
| chr2 | 170494031 | T | T   | T   | Heterozygous CTC subset of CPP |
| chr2 | 170592284 | T | T   | T   | Heterozygous CTC subset of CPP |
| chr2 | 170592709 | A | A,G | A,G | Heterozygous CTC subset of CPP |
| chr2 | 170665403 | T | T   | T   | Heterozygous CTC subset of CPP |
| chr2 | 171804939 | T | T   | T   | Heterozygous CTC subset of CPP |
| chr2 | 171910313 | C | C,T | C,T | Heterozygous CTC subset of CPP |
| chr2 | 173335760 | T | T   | T   | Heterozygous CTC subset of CPP |
| chr2 | 173339808 | G | A,G | G   | Heterozygous CTC subset of CPP |
| chr2 | 174034535 | A | A   | A   | Heterozygous CTC subset of CPP |
| chr2 | 174828539 | C | C,G | C   | Heterozygous CTC subset of CPP |
| chr2 | 174988328 | T | T   | T   | Heterozygous CTC subset of CPP |
| chr2 | 175006557 | T | T   | T   | Heterozygous CTC subset of CPP |
| chr2 | 175957856 | C | C   | C   | Heterozygous CTC subset of CPP |
| chr2 | 178082488 | T | T   | T   | Heterozygous CTC subset of CPP |
| chr2 | 178095904 | A | A   | A   | Heterozygous CTC subset of CPP |
| chr2 | 178096401 | A | A,C | A   | Heterozygous CTC subset of CPP |
| chr2 | 178097177 | A | A   | A   | Heterozygous CTC subset of CPP |
| chr2 | 178378635 | A | A   | A   | Heterozygous CTC subset of CPP |
| chr2 | 178402955 | T | T   | T   | Heterozygous CTC subset of CPP |
| chr2 | 180810180 | C | C,T | T   | Heterozygous CTC subset of CPP |
| chr2 | 180810264 | A | A,T | T   | Heterozygous CTC subset of CPP |
| chr2 | 182763829 | A | A   | A   | Heterozygous CTC subset of CPP |
| chr2 | 182763831 | A | A   | A   | Heterozygous CTC subset of CPP |
| chr2 | 182766789 | A | A   | A   | Heterozygous CTC subset of CPP |
| chr2 | 183584755 | G | A,G | A   | Heterozygous CTC subset of CPP |
| chr2 | 183593697 | C | C,T | T   | Heterozygous CTC subset of CPP |
| chr2 | 183622547 | T | G,T | G   | Heterozygous CTC subset of CPP |
| chr2 | 183627504 | A | A,G | G   | Heterozygous CTC subset of CPP |
| chr2 | 183640147 | G | G   | G   | Heterozygous CTC subset of CPP |

Grillet et al., Supplementary Table 5

|      |           |   |      |      |                                |
|------|-----------|---|------|------|--------------------------------|
| chr2 | 187521124 | T | T    | T    | Heterozygous CTC subset of CPP |
| chr2 | 190322062 | A | A    | A    | Heterozygous CTC subset of CPP |
| chr2 | 190323530 | A | A,G  | G    | Heterozygous CTC subset of CPP |
| chr2 | 190531370 | A | A    | A    | Heterozygous CTC subset of CPP |
| chr2 | 190531383 | A | A    | A    | Heterozygous CTC subset of CPP |
| chr2 | 190535400 | T | T    | T    | Heterozygous CTC subset of CPP |
| chr2 | 190660572 | A | A    | A    | Heterozygous CTC subset of CPP |
| chr2 | 191077698 | A | A    | A    | Heterozygous CTC subset of CPP |
| chr2 | 191161622 | T | C    | C    | Heterozygous CTC subset of CPP |
| chr2 | 191184475 | A | A,G  | G    | Heterozygous CTC subset of CPP |
| chr2 | 191224981 | G | G    | G    | Heterozygous CTC subset of CPP |
| chr2 | 191231458 | G | A,G  | A,G  | Heterozygous CTC subset of CPP |
| chr2 | 191231618 | A | A    | A    | Heterozygous CTC subset of CPP |
| chr2 | 191760430 | T | T    | T    | Heterozygous CTC subset of CPP |
| chr2 | 191769797 | A | A    | A    | Heterozygous CTC subset of CPP |
| chr2 | 191788709 | G | +T,G | +T,G | Heterozygous CTC subset of CPP |
| chr2 | 191847212 | T | T    | T    | Heterozygous CTC subset of CPP |
| chr2 | 191859840 | G | G    | G    | Heterozygous CTC subset of CPP |
| chr2 | 192160875 | C | C,T  | C,T  | Heterozygous CTC subset of CPP |
| chr2 | 192225450 | T | T    | T    | Heterozygous CTC subset of CPP |
| chr2 | 192227015 | A | A    | A    | Heterozygous CTC subset of CPP |
| chr2 | 192278789 | C | C    | C    | Heterozygous CTC subset of CPP |
| chr2 | 197654731 | T | T    | T    | Heterozygous CTC subset of CPP |
| chr2 | 198257795 | T | C,T  | C    | Heterozygous CTC subset of CPP |
| chr2 | 198265526 | A | A,G  | G    | Heterozygous CTC subset of CPP |
| chr2 | 198283305 | T | C,T  | C    | Heterozygous CTC subset of CPP |
| chr2 | 198351914 | T | T    | T    | Heterozygous CTC subset of CPP |
| chr2 | 198353971 | C | -C,C | -C,C | Heterozygous CTC subset of CPP |
| chr2 | 198353972 | C | C    | C    | Heterozygous CTC subset of CPP |
| chr2 | 198353973 | T | T    | T    | Heterozygous CTC subset of CPP |
| chr2 | 198359396 | A | A    | A    | Heterozygous CTC subset of CPP |
| chr2 | 198362018 | T | C,T  | C    | Heterozygous CTC subset of CPP |
| chr2 | 198365126 | C | C,T  | C    | Heterozygous CTC subset of CPP |
| chr2 | 198365950 | T | T    | T    | Heterozygous CTC subset of CPP |
| chr2 | 198367765 | T | T    | T    | Heterozygous CTC subset of CPP |
| chr2 | 198367788 | T | T    | T    | Heterozygous CTC subset of CPP |
| chr2 | 198367790 | A | A    | A    | Heterozygous CTC subset of CPP |
| chr2 | 198570883 | G | G    | G    | Heterozygous CTC subset of CPP |
| chr2 | 201253956 | A | A,G  | A    | Heterozygous CTC subset of CPP |
| chr2 | 201721686 | A | A    | A    | Heterozygous CTC subset of CPP |
| chr2 | 201736166 | A | A    | A    | Heterozygous CTC subset of CPP |
| chr2 | 201757054 | T | T    | T    | Heterozygous CTC subset of CPP |
| chr2 | 201784981 | A | A    | A    | Heterozygous CTC subset of CPP |
| chr2 | 201822201 | T | T    | T    | Heterozygous CTC subset of CPP |
| chr2 | 202149696 | G | A,G  | G    | Heterozygous CTC subset of CPP |
| chr2 | 202252723 | T | T    | T    | Heterozygous CTC subset of CPP |

Grillet et al., Supplementary Table 5

|      |           |   |        |        |                                |
|------|-----------|---|--------|--------|--------------------------------|
| chr2 | 203139904 | A | A      | A      | Heterozygous CTC subset of CPP |
| chr2 | 203745660 | G | G      | G      | Heterozygous CTC subset of CPP |
| chr2 | 203749258 | T | T      | T      | Heterozygous CTC subset of CPP |
| chr2 | 207006676 | T | C,T    | T      | Heterozygous CTC subset of CPP |
| chr2 | 207008763 | C | A,C    | C      | Heterozygous CTC subset of CPP |
| chr2 | 207026142 | T | T      | T      | Heterozygous CTC subset of CPP |
| chr2 | 207027321 | G | G      | G      | Heterozygous CTC subset of CPP |
| chr2 | 210881337 | A | A      | A      | Heterozygous CTC subset of CPP |
| chr2 | 210882256 | T | T      | T      | Heterozygous CTC subset of CPP |
| chr2 | 216176807 | T | G,T    | G,T    | Heterozygous CTC subset of CPP |
| chr2 | 216190020 | C | C,G    | C,G    | Heterozygous CTC subset of CPP |
| chr2 | 217012901 | A | A,G    | A,G    | Heterozygous CTC subset of CPP |
| chr2 | 217498287 | C | C      | C      | Heterozygous CTC subset of CPP |
| chr2 | 217526721 | G | G      | G      | Heterozygous CTC subset of CPP |
| chr2 | 219140288 | G | C,G    | G      | Heterozygous CTC subset of CPP |
| chr2 | 219146882 | G | C,G    | G      | Heterozygous CTC subset of CPP |
| chr2 | 219266423 | C | A,C    | A,C    | Heterozygous CTC subset of CPP |
| chr2 | 219267781 | C | C,T    | C      | Heterozygous CTC subset of CPP |
| chr2 | 219303381 | A | +A,A,T | A      | Heterozygous CTC subset of CPP |
| chr2 | 219449404 | T | T      | T      | Heterozygous CTC subset of CPP |
| chr2 | 219457052 | T | C,T    | T      | Heterozygous CTC subset of CPP |
| chr2 | 219529881 | G | A,G    | G      | Heterozygous CTC subset of CPP |
| chr2 | 219612336 | T | T      | T      | Heterozygous CTC subset of CPP |
| chr2 | 220037666 | A | G      | G      | Heterozygous CTC subset of CPP |
| chr2 | 220037756 | A | G      | G      | Heterozygous CTC subset of CPP |
| chr2 | 220039563 | T | T      | T      | Heterozygous CTC subset of CPP |
| chr2 | 220040330 | A | G      | G      | Heterozygous CTC subset of CPP |
| chr2 | 220045430 | T | T      | T      | Heterozygous CTC subset of CPP |
| chr2 | 220046975 | C | A,C    | A      | Heterozygous CTC subset of CPP |
| chr2 | 220088912 | A | A      | A      | Heterozygous CTC subset of CPP |
| chr2 | 220098865 | T | T      | T      | Heterozygous CTC subset of CPP |
| chr2 | 220111518 | A | A      | A      | Heterozygous CTC subset of CPP |
| chr2 | 220118577 | C | +G,C   | +G,C   | Heterozygous CTC subset of CPP |
| chr2 | 220118578 | C | +C,C,G | +C,C,G | Heterozygous CTC subset of CPP |
| chr2 | 220146663 | A | A      | A      | Heterozygous CTC subset of CPP |
| chr2 | 220148152 | A | A      | A      | Heterozygous CTC subset of CPP |
| chr2 | 220148166 | G | G      | G      | Heterozygous CTC subset of CPP |
| chr2 | 220246124 | T | T      | T      | Heterozygous CTC subset of CPP |
| chr2 | 220251701 | A | A      | A      | Heterozygous CTC subset of CPP |
| chr2 | 220371035 | C | C,G    | C      | Heterozygous CTC subset of CPP |
| chr2 | 220405761 | G | A,G    | G      | Heterozygous CTC subset of CPP |
| chr2 | 220406722 | T | C,T    | C      | Heterozygous CTC subset of CPP |
| chr2 | 223464786 | G | G      | G      | Heterozygous CTC subset of CPP |
| chr2 | 224743373 | C | C,T    | T      | Heterozygous CTC subset of CPP |
| chr2 | 224824617 | A | A,G    | A      | Heterozygous CTC subset of CPP |
| chr2 | 228337204 | C | C      | C      | Heterozygous CTC subset of CPP |

Grillet et al., Supplementary Table 5

|       |           |   |     |     |                                |
|-------|-----------|---|-----|-----|--------------------------------|
| chr2  | 230632349 | T | T   | T   | Heterozygous CTC subset of CPP |
| chr2  | 230653583 | T | T   | T   | Heterozygous CTC subset of CPP |
| chr2  | 230661453 | A | A   | A   | Heterozygous CTC subset of CPP |
| chr2  | 230661463 | A | A   | A   | Heterozygous CTC subset of CPP |
| chr2  | 230668876 | A | A   | A   | Heterozygous CTC subset of CPP |
| chr2  | 230675918 | A | A   | A   | Heterozygous CTC subset of CPP |
| chr2  | 230678695 | T | T   | T   | Heterozygous CTC subset of CPP |
| chr2  | 230723777 | G | C,G | G   | Heterozygous CTC subset of CPP |
| chr2  | 230724115 | G | G   | G   | Heterozygous CTC subset of CPP |
| chr2  | 230724210 | G | G   | G   | Heterozygous CTC subset of CPP |
| chr2  | 231947707 | A | A   | A   | Heterozygous CTC subset of CPP |
| chr2  | 232576598 | A | A   | A   | Heterozygous CTC subset of CPP |
| chr2  | 232576599 | G | G   | G   | Heterozygous CTC subset of CPP |
| chr2  | 232660825 | T | T   | T   | Heterozygous CTC subset of CPP |
| chr2  | 232661009 | T | T   | T   | Heterozygous CTC subset of CPP |
| chr2  | 232672323 | A | A   | A   | Heterozygous CTC subset of CPP |
| chr2  | 233708806 | A | A,G | A,G | Heterozygous CTC subset of CPP |
| chr2  | 234749258 | T | C,T | T   | Heterozygous CTC subset of CPP |
| chr2  | 234749780 | G | C,G | G   | Heterozygous CTC subset of CPP |
| chr2  | 234749783 | C | C,G | C   | Heterozygous CTC subset of CPP |
| chr2  | 234749910 | T | T   | T   | Heterozygous CTC subset of CPP |
| chr2  | 234750831 | T | C,T | C   | Heterozygous CTC subset of CPP |
| chr2  | 234761225 | C | C,T | C,T | Heterozygous CTC subset of CPP |
| chr2  | 234761265 | T | T   | T   | Heterozygous CTC subset of CPP |
| chr2  | 235950143 | T | T   | T   | Heterozygous CTC subset of CPP |
| chr2  | 235951322 | T | T   | T   | Heterozygous CTC subset of CPP |
| chr2  | 235961381 | T | T   | T   | Heterozygous CTC subset of CPP |
| chr2  | 235962350 | A | A   | A   | Heterozygous CTC subset of CPP |
| chr2  | 238672188 | T | T   | T   | Heterozygous CTC subset of CPP |
| chr2  | 238990388 | G | A,G | G   | Heterozygous CTC subset of CPP |
| chr2  | 239092381 | C | C   | C   | Heterozygous CTC subset of CPP |
| chr2  | 240946766 | T | C,T | C,T | Heterozygous CTC subset of CPP |
| chr2  | 242035533 | A | A   | A   | Heterozygous CTC subset of CPP |
| chr2  | 242572846 | A | A,G | A   | Heterozygous CTC subset of CPP |
| chr2  | 242573211 | T | C,T | T   | Heterozygous CTC subset of CPP |
| chr2  | 242593011 | G | A,G | G   | Heterozygous CTC subset of CPP |
| chr2  | 242610738 | T | C,T | C,T | Heterozygous CTC subset of CPP |
| chr2  | 242618050 | A | A,G | A,G | Heterozygous CTC subset of CPP |
| chr20 | 278508    | G | G   | G   | Heterozygous CTC subset of CPP |
| chr20 | 278509    | C | C   | C   | Heterozygous CTC subset of CPP |
| chr20 | 278515    | T | C,T | C   | Heterozygous CTC subset of CPP |
| chr20 | 278806    | C | C,T | C   | Heterozygous CTC subset of CPP |
| chr20 | 371972    | T | C,T | C   | Heterozygous CTC subset of CPP |
| chr20 | 377226    | C | C,T | T   | Heterozygous CTC subset of CPP |
| chr20 | 391170    | C | C,T | C   | Heterozygous CTC subset of CPP |
| chr20 | 422275    | T | T   | T   | Heterozygous CTC subset of CPP |



Grillet et al., Supplementary Table 5

|       |          |   |     |     |                                |
|-------|----------|---|-----|-----|--------------------------------|
| chr20 | 628742   | G | A,G | G   | Heterozygous CTC subset of CPP |
| chr20 | 628890   | T | C,T | C,T | Heterozygous CTC subset of CPP |
| chr20 | 1350672  | T | C,T | C,T | Heterozygous CTC subset of CPP |
| chr20 | 1424407  | T | T   | T   | Heterozygous CTC subset of CPP |
| chr20 | 1426393  | C | C,T | C   | Heterozygous CTC subset of CPP |
| chr20 | 1444975  | T | T   | T   | Heterozygous CTC subset of CPP |
| chr20 | 2083972  | T | T   | T   | Heterozygous CTC subset of CPP |
| chr20 | 2097498  | A | A   | A   | Heterozygous CTC subset of CPP |
| chr20 | 2097614  | A | A   | A   | Heterozygous CTC subset of CPP |
| chr20 | 2097623  | A | A   | A   | Heterozygous CTC subset of CPP |
| chr20 | 2633296  | G | C,G | C,G | Heterozygous CTC subset of CPP |
| chr20 | 2637071  | T | C,T | C,T | Heterozygous CTC subset of CPP |
| chr20 | 2638043  | T | T   | T   | Heterozygous CTC subset of CPP |
| chr20 | 2996497  | C | C,T | C   | Heterozygous CTC subset of CPP |
| chr20 | 3129232  | A | A   | A   | Heterozygous CTC subset of CPP |
| chr20 | 3171337  | C | C,T | C   | Heterozygous CTC subset of CPP |
| chr20 | 3180669  | A | A   | A   | Heterozygous CTC subset of CPP |
| chr20 | 3193978  | G | A,G | A,G | Heterozygous CTC subset of CPP |
| chr20 | 3204084  | G | A,G | A,G | Heterozygous CTC subset of CPP |
| chr20 | 3782702  | G | A,G | G   | Heterozygous CTC subset of CPP |
| chr20 | 3784110  | C | C,T | C,T | Heterozygous CTC subset of CPP |
| chr20 | 3846397  | C | C,T | C   | Heterozygous CTC subset of CPP |
| chr20 | 3899379  | T | T   | T   | Heterozygous CTC subset of CPP |
| chr20 | 5086915  | T | C,T | T   | Heterozygous CTC subset of CPP |
| chr20 | 5096099  | G | G   | G   | Heterozygous CTC subset of CPP |
| chr20 | 5923203  | T | C,T | C,T | Heterozygous CTC subset of CPP |
| chr20 | 5923204  | T | C,T | C,T | Heterozygous CTC subset of CPP |
| chr20 | 5965430  | G | G   | G   | Heterozygous CTC subset of CPP |
| chr20 | 5986950  | G | A,G | G   | Heterozygous CTC subset of CPP |
| chr20 | 6011934  | C | C,T | C   | Heterozygous CTC subset of CPP |
| chr20 | 6060086  | C | C   | C   | Heterozygous CTC subset of CPP |
| chr20 | 6093178  | T | T   | T   | Heterozygous CTC subset of CPP |
| chr20 | 6100088  | A | A,G | A   | Heterozygous CTC subset of CPP |
| chr20 | 11900442 | G | A,G | G   | Heterozygous CTC subset of CPP |
| chr20 | 13695680 | C | C,T | T   | Heterozygous CTC subset of CPP |
| chr20 | 13747441 | A | A,G | G   | Heterozygous CTC subset of CPP |
| chr20 | 13747486 | T | T   | T   | Heterozygous CTC subset of CPP |
| chr20 | 17596155 | C | A,C | C   | Heterozygous CTC subset of CPP |
| chr20 | 17599298 | T | C,T | T   | Heterozygous CTC subset of CPP |
| chr20 | 17600357 | G | A,G | A,G | Heterozygous CTC subset of CPP |
| chr20 | 17639535 | C | C   | C   | Heterozygous CTC subset of CPP |
| chr20 | 17639683 | C | C   | C   | Heterozygous CTC subset of CPP |
| chr20 | 17639739 | C | C   | C   | Heterozygous CTC subset of CPP |
| chr20 | 17639786 | T | G,T | G,T | Heterozygous CTC subset of CPP |
| chr20 | 17639790 | C | C,T | C   | Heterozygous CTC subset of CPP |
| chr20 | 17639816 | T | G,T | G,T | Heterozygous CTC subset of CPP |

Grillet et al., Supplementary Table 5

|       |          |   |     |     |                                |
|-------|----------|---|-----|-----|--------------------------------|
| chr20 | 17639820 | C | C   | C   | Heterozygous CTC subset of CPP |
| chr20 | 17639837 | C | C   | C   | Heterozygous CTC subset of CPP |
| chr20 | 17639846 | T | G,T | G,T | Heterozygous CTC subset of CPP |
| chr20 | 17639850 | C | C,T | C   | Heterozygous CTC subset of CPP |
| chr20 | 17639857 | G | G,T | G,T | Heterozygous CTC subset of CPP |
| chr20 | 17639864 | T | T   | T   | Heterozygous CTC subset of CPP |
| chr20 | 17639867 | C | C   | C   | Heterozygous CTC subset of CPP |
| chr20 | 17639876 | T | G,T | T   | Heterozygous CTC subset of CPP |
| chr20 | 17639880 | C | C   | C   | Heterozygous CTC subset of CPP |
| chr20 | 17640176 | T | T   | T   | Heterozygous CTC subset of CPP |
| chr20 | 17923810 | C | C   | C   | Heterozygous CTC subset of CPP |
| chr20 | 17932210 | C | C   | C   | Heterozygous CTC subset of CPP |
| chr20 | 17933267 | A | A   | A   | Heterozygous CTC subset of CPP |
| chr20 | 17934760 | A | A   | A   | Heterozygous CTC subset of CPP |
| chr20 | 17950772 | A | A,G | A   | Heterozygous CTC subset of CPP |
| chr20 | 17970678 | T | T   | T   | Heterozygous CTC subset of CPP |
| chr20 | 17970725 | T | T   | T   | Heterozygous CTC subset of CPP |
| chr20 | 18513372 | C | C,T | C   | Heterozygous CTC subset of CPP |
| chr20 | 18523002 | C | C,G | C   | Heterozygous CTC subset of CPP |
| chr20 | 18549935 | A | A   | A   | Heterozygous CTC subset of CPP |
| chr20 | 18550055 | T | T   | T   | Heterozygous CTC subset of CPP |
| chr20 | 18550109 | T | T   | T   | Heterozygous CTC subset of CPP |
| chr20 | 20032998 | T | C,T | T   | Heterozygous CTC subset of CPP |
| chr20 | 21319726 | G | G   | G   | Heterozygous CTC subset of CPP |
| chr20 | 24952135 | C | C,T | C   | Heterozygous CTC subset of CPP |
| chr20 | 25193949 | G | A,G | G   | Heterozygous CTC subset of CPP |
| chr20 | 25195509 | A | A,G | G   | Heterozygous CTC subset of CPP |
| chr20 | 25273107 | A | A   | A   | Heterozygous CTC subset of CPP |
| chr20 | 25282897 | T | T   | T   | Heterozygous CTC subset of CPP |
| chr20 | 25284187 | T | T   | T   | Heterozygous CTC subset of CPP |
| chr20 | 25287469 | T | T   | T   | Heterozygous CTC subset of CPP |
| chr20 | 25289111 | G | A,G | G   | Heterozygous CTC subset of CPP |
| chr20 | 30354417 | G | A,G | G   | Heterozygous CTC subset of CPP |
| chr20 | 30729619 | G | A,G | G   | Heterozygous CTC subset of CPP |
| chr20 | 30804466 | T | T   | T   | Heterozygous CTC subset of CPP |
| chr20 | 30822354 | A | A   | A   | Heterozygous CTC subset of CPP |
| chr20 | 31022972 | A | A   | A   | Heterozygous CTC subset of CPP |
| chr20 | 31023426 | A | A   | A   | Heterozygous CTC subset of CPP |
| chr20 | 31025154 | A | A   | A   | Heterozygous CTC subset of CPP |
| chr20 | 31421659 | T | T   | T   | Heterozygous CTC subset of CPP |
| chr20 | 31981849 | T | C,T | C   | Heterozygous CTC subset of CPP |
| chr20 | 32246325 | A | A   | A   | Heterozygous CTC subset of CPP |
| chr20 | 32266134 | C | C,T | C   | Heterozygous CTC subset of CPP |
| chr20 | 32664866 | G | A,G | A   | Heterozygous CTC subset of CPP |
| chr20 | 33067582 | A | A   | A   | Heterozygous CTC subset of CPP |
| chr20 | 33329332 | A | A   | A   | Heterozygous CTC subset of CPP |

Grillet et al., Supplementary Table 5

|       |          |   |      |      |                                |
|-------|----------|---|------|------|--------------------------------|
| chr20 | 33337212 | T | T    | T    | Heterozygous CTC subset of CPP |
| chr20 | 33356296 | T | T    | T    | Heterozygous CTC subset of CPP |
| chr20 | 33470694 | C | C,T  | T    | Heterozygous CTC subset of CPP |
| chr20 | 33764632 | C | C,G  | G    | Heterozygous CTC subset of CPP |
| chr20 | 33971914 | C | C,T  | C,T  | Heterozygous CTC subset of CPP |
| chr20 | 34240476 | A | A    | A    | Heterozygous CTC subset of CPP |
| chr20 | 34240740 | A | A    | A    | Heterozygous CTC subset of CPP |
| chr20 | 34240764 | A | A    | A    | Heterozygous CTC subset of CPP |
| chr20 | 34263006 | C | C    | C    | Heterozygous CTC subset of CPP |
| chr20 | 34304724 | C | +A,C | +A,C | Heterozygous CTC subset of CPP |
| chr20 | 34304726 | A | A,T  | A,T  | Heterozygous CTC subset of CPP |
| chr20 | 34515754 | A | A    | A    | Heterozygous CTC subset of CPP |
| chr20 | 35090941 | T | T    | T    | Heterozygous CTC subset of CPP |
| chr20 | 35281959 | G | G    | G    | Heterozygous CTC subset of CPP |
| chr20 | 35835826 | G | A,G  | G    | Heterozygous CTC subset of CPP |
| chr20 | 35865054 | C | C,T  | T    | Heterozygous CTC subset of CPP |
| chr20 | 35869801 | G | +A,G | G    | Heterozygous CTC subset of CPP |
| chr20 | 36640292 | T | T    | T    | Heterozygous CTC subset of CPP |
| chr20 | 36640720 | T | T    | T    | Heterozygous CTC subset of CPP |
| chr20 | 37126098 | A | A    | A    | Heterozygous CTC subset of CPP |
| chr20 | 37400359 | T | T    | T    | Heterozygous CTC subset of CPP |
| chr20 | 37555116 | G | C,G  | C    | Heterozygous CTC subset of CPP |
| chr20 | 39657625 | C | A,C  | C    | Heterozygous CTC subset of CPP |
| chr20 | 39792722 | G | G    | G    | Heterozygous CTC subset of CPP |
| chr20 | 39796569 | G | G    | G    | Heterozygous CTC subset of CPP |
| chr20 | 39797465 | T | C,T  | C,T  | Heterozygous CTC subset of CPP |
| chr20 | 39802814 | G | G    | G    | Heterozygous CTC subset of CPP |
| chr20 | 39802925 | A | A    | A    | Heterozygous CTC subset of CPP |
| chr20 | 42088754 | T | T    | T    | Heterozygous CTC subset of CPP |
| chr20 | 42242616 | G | G    | G    | Heterozygous CTC subset of CPP |
| chr20 | 42825946 | A | A    | A    | Heterozygous CTC subset of CPP |
| chr20 | 42831713 | A | A    | A    | Heterozygous CTC subset of CPP |
| chr20 | 43047099 | T | T    | T    | Heterozygous CTC subset of CPP |
| chr20 | 43530234 | A | A,C  | A    | Heterozygous CTC subset of CPP |
| chr20 | 43550371 | A | A    | A    | Heterozygous CTC subset of CPP |
| chr20 | 43610539 | T | T    | T    | Heterozygous CTC subset of CPP |
| chr20 | 43629135 | G | A,G  | A,G  | Heterozygous CTC subset of CPP |
| chr20 | 43653717 | T | T    | T    | Heterozygous CTC subset of CPP |
| chr20 | 43976991 | A | A,G  | A,G  | Heterozygous CTC subset of CPP |
| chr20 | 43994326 | G | G    | G    | Heterozygous CTC subset of CPP |
| chr20 | 44038574 | A | A,G  | G    | Heterozygous CTC subset of CPP |
| chr20 | 44052992 | G | A,G  | A,G  | Heterozygous CTC subset of CPP |
| chr20 | 44054349 | T | C,T  | C    | Heterozygous CTC subset of CPP |
| chr20 | 44434005 | G | G    | G    | Heterozygous CTC subset of CPP |
| chr20 | 44576011 | G | G    | G    | Heterozygous CTC subset of CPP |
| chr20 | 44576014 | A | A    | A    | Heterozygous CTC subset of CPP |

Grillet et al., Supplementary Table 5

|       |          |   |       |       |                                |
|-------|----------|---|-------|-------|--------------------------------|
| chr20 | 44691350 | T | T     | T     | Heterozygous CTC subset of CPP |
| chr20 | 44691384 | T | T     | T     | Heterozygous CTC subset of CPP |
| chr20 | 44695749 | A | A     | A     | Heterozygous CTC subset of CPP |
| chr20 | 44979156 | A | A     | A     | Heterozygous CTC subset of CPP |
| chr20 | 45910922 | A | A     | A     | Heterozygous CTC subset of CPP |
| chr20 | 45920580 | T | T     | T     | Heterozygous CTC subset of CPP |
| chr20 | 45927607 | T | T     | T     | Heterozygous CTC subset of CPP |
| chr20 | 46365636 | C | C     | C     | Heterozygous CTC subset of CPP |
| chr20 | 46365685 | A | A     | A     | Heterozygous CTC subset of CPP |
| chr20 | 47685320 | G | C,G   | G     | Heterozygous CTC subset of CPP |
| chr20 | 47739698 | C | +T,C  | +T,C  | Heterozygous CTC subset of CPP |
| chr20 | 47841660 | G | G,T   | G     | Heterozygous CTC subset of CPP |
| chr20 | 47859217 | G | A,G   | A     | Heterozygous CTC subset of CPP |
| chr20 | 48252914 | C | C,T   | C,T   | Heterozygous CTC subset of CPP |
| chr20 | 48259034 | A | A,G   | A,G   | Heterozygous CTC subset of CPP |
| chr20 | 48259048 | A | A     | A     | Heterozygous CTC subset of CPP |
| chr20 | 48263522 | G | G     | G     | Heterozygous CTC subset of CPP |
| chr20 | 48565831 | G | A,G   | G     | Heterozygous CTC subset of CPP |
| chr20 | 48807803 | A | A     | A     | Heterozygous CTC subset of CPP |
| chr20 | 48807847 | G | G     | G     | Heterozygous CTC subset of CPP |
| chr20 | 48808011 | C | C,T   | C,T   | Heterozygous CTC subset of CPP |
| chr20 | 49196439 | A | A     | A     | Heterozygous CTC subset of CPP |
| chr20 | 49508204 | T | -T,T  | T     | Heterozygous CTC subset of CPP |
| chr20 | 49508508 | C | C,T   | C     | Heterozygous CTC subset of CPP |
| chr20 | 49508683 | G | A,G   | G     | Heterozygous CTC subset of CPP |
| chr20 | 49509175 | C | C,T   | C     | Heterozygous CTC subset of CPP |
| chr20 | 49509184 | G | A,G   | G     | Heterozygous CTC subset of CPP |
| chr20 | 49510227 | T | T     | T     | Heterozygous CTC subset of CPP |
| chr20 | 50225124 | A | A     | A     | Heterozygous CTC subset of CPP |
| chr20 | 50287736 | C | C,T   | C,T   | Heterozygous CTC subset of CPP |
| chr20 | 50292677 | T | T     | T     | Heterozygous CTC subset of CPP |
| chr20 | 52835677 | T | T     | T     | Heterozygous CTC subset of CPP |
| chr20 | 54961463 | T | C,T   | C     | Heterozygous CTC subset of CPP |
| chr20 | 54974332 | A | A     | A     | Heterozygous CTC subset of CPP |
| chr20 | 55948634 | A | A     | A     | Heterozygous CTC subset of CPP |
| chr20 | 57020228 | G | C,G   | G     | Heterozygous CTC subset of CPP |
| chr20 | 57244493 | G | A,G   | A     | Heterozygous CTC subset of CPP |
| chr20 | 57276170 | A | A     | A     | Heterozygous CTC subset of CPP |
| chr20 | 57464276 | G | G     | G     | Heterozygous CTC subset of CPP |
| chr20 | 57464289 | T | T     | T     | Heterozygous CTC subset of CPP |
| chr20 | 57478582 | G | A,G   | A,G   | Heterozygous CTC subset of CPP |
| chr20 | 57478585 | G | G     | G     | Heterozygous CTC subset of CPP |
| chr20 | 57478807 | C | C,T   | T     | Heterozygous CTC subset of CPP |
| chr20 | 57484216 | G | +TA,G | +TA,G | Heterozygous CTC subset of CPP |
| chr20 | 57571763 | A | A,G   | A,G   | Heterozygous CTC subset of CPP |
| chr20 | 57572808 | T | T     | T     | Heterozygous CTC subset of CPP |

Grillet et al., Supplementary Table 5

|       |          |   |      |      |                                |
|-------|----------|---|------|------|--------------------------------|
| chr20 | 60572663 | C | A,C  | A    | Heterozygous CTC subset of CPP |
| chr20 | 60584161 | T | T    | T    | Heterozygous CTC subset of CPP |
| chr20 | 60713311 | G | A,G  | A,G  | Heterozygous CTC subset of CPP |
| chr20 | 60713332 | A | A,G  | G    | Heterozygous CTC subset of CPP |
| chr20 | 60775932 | C | C,T  | C    | Heterozygous CTC subset of CPP |
| chr20 | 60775961 | C | C    | C    | Heterozygous CTC subset of CPP |
| chr20 | 60776000 | T | T    | T    | Heterozygous CTC subset of CPP |
| chr20 | 60776054 | T | T    | T    | Heterozygous CTC subset of CPP |
| chr20 | 60886127 | A | A    | A    | Heterozygous CTC subset of CPP |
| chr20 | 60887468 | G | A,G  | G    | Heterozygous CTC subset of CPP |
| chr20 | 60890153 | A | A    | A    | Heterozygous CTC subset of CPP |
| chr20 | 60962969 | T | +G,T | +G,T | Heterozygous CTC subset of CPP |
| chr20 | 60962977 | G | C,G  | C,G  | Heterozygous CTC subset of CPP |
| chr20 | 61288038 | G | A,G  | A,G  | Heterozygous CTC subset of CPP |
| chr20 | 61288355 | G | G,T  | G,T  | Heterozygous CTC subset of CPP |
| chr20 | 61303264 | C | C    | C    | Heterozygous CTC subset of CPP |
| chr20 | 61389669 | G | A,G  | G    | Heterozygous CTC subset of CPP |
| chr20 | 61436382 | G | -G,G | G    | Heterozygous CTC subset of CPP |
| chr20 | 61443716 | G | A,G  | G    | Heterozygous CTC subset of CPP |
| chr20 | 61444244 | C | C,T  | C    | Heterozygous CTC subset of CPP |
| chr20 | 61444605 | A | A,G  | A    | Heterozygous CTC subset of CPP |
| chr20 | 61444665 | G | G    | G    | Heterozygous CTC subset of CPP |
| chr20 | 61444840 | C | C    | C    | Heterozygous CTC subset of CPP |
| chr20 | 61444845 | G | G    | G    | Heterozygous CTC subset of CPP |
| chr20 | 61488785 | T | C,T  | C,T  | Heterozygous CTC subset of CPP |
| chr20 | 61510798 | G | G    | G    | Heterozygous CTC subset of CPP |
| chr20 | 61523362 | T | T    | T    | Heterozygous CTC subset of CPP |
| chr20 | 61528306 | A | A,G  | G    | Heterozygous CTC subset of CPP |
| chr20 | 61588159 | A | A,G  | G    | Heterozygous CTC subset of CPP |
| chr20 | 61595636 | C | C,T  | C    | Heterozygous CTC subset of CPP |
| chr20 | 61834092 | G | A,G  | A,G  | Heterozygous CTC subset of CPP |
| chr20 | 61834695 | G | A,G  | A,G  | Heterozygous CTC subset of CPP |
| chr20 | 61834855 | G | A,G  | G    | Heterozygous CTC subset of CPP |
| chr20 | 61912663 | T | T    | T    | Heterozygous CTC subset of CPP |
| chr20 | 62127326 | G | A,G  | G    | Heterozygous CTC subset of CPP |
| chr20 | 62152661 | C | C,T  | C    | Heterozygous CTC subset of CPP |
| chr20 | 62340052 | G | G    | G    | Heterozygous CTC subset of CPP |
| chr20 | 62364650 | T | T    | T    | Heterozygous CTC subset of CPP |
| chr20 | 62364953 | T | T    | T    | Heterozygous CTC subset of CPP |
| chr20 | 62366161 | T | T    | T    | Heterozygous CTC subset of CPP |
| chr20 | 62372813 | G | A,G  | A,G  | Heterozygous CTC subset of CPP |
| chr20 | 62373707 | G | G,T  | G,T  | Heterozygous CTC subset of CPP |
| chr20 | 62571809 | G | G    | G    | Heterozygous CTC subset of CPP |
| chr20 | 62572149 | G | G    | G    | Heterozygous CTC subset of CPP |
| chr20 | 62612574 | C | C,T  | C    | Heterozygous CTC subset of CPP |
| chr20 | 62641575 | G | G    | G    | Heterozygous CTC subset of CPP |

Grillet et al., Supplementary Table 5

|       |          |   |     |     |                                |
|-------|----------|---|-----|-----|--------------------------------|
| chr20 | 62664365 | C | C,T | C,T | Heterozygous CTC subset of CPP |
| chr20 | 62904789 | G | G   | G   | Heterozygous CTC subset of CPP |
| chr21 | 26965148 | G | A,G | A   | Heterozygous CTC subset of CPP |
| chr21 | 26965205 | T | C,T | C   | Heterozygous CTC subset of CPP |
| chr21 | 26969703 | T | C,T | C   | Heterozygous CTC subset of CPP |
| chr21 | 26978950 | A | A,G | G   | Heterozygous CTC subset of CPP |
| chr21 | 27096860 | A | A   | A   | Heterozygous CTC subset of CPP |
| chr21 | 27096872 | T | T   | T   | Heterozygous CTC subset of CPP |
| chr21 | 27326972 | C | C,T | C   | Heterozygous CTC subset of CPP |
| chr21 | 30409784 | G | G   | G   | Heterozygous CTC subset of CPP |
| chr21 | 30439908 | T | T   | T   | Heterozygous CTC subset of CPP |
| chr21 | 33043977 | T | T   | T   | Heterozygous CTC subset of CPP |
| chr21 | 34120989 | C | C   | C   | Heterozygous CTC subset of CPP |
| chr21 | 34787312 | A | A,G | A   | Heterozygous CTC subset of CPP |
| chr21 | 34883618 | T | C,T | C,T | Heterozygous CTC subset of CPP |
| chr21 | 34892778 | A | A   | A   | Heterozygous CTC subset of CPP |
| chr21 | 34897113 | C | C,T | T   | Heterozygous CTC subset of CPP |
| chr21 | 34922173 | A | A,G | A   | Heterozygous CTC subset of CPP |
| chr21 | 34923319 | A | A   | A   | Heterozygous CTC subset of CPP |
| chr21 | 34923994 | C | C   | C   | Heterozygous CTC subset of CPP |
| chr21 | 34924243 | T | C,T | C,T | Heterozygous CTC subset of CPP |
| chr21 | 34924696 | G | G   | G   | Heterozygous CTC subset of CPP |
| chr21 | 34925689 | G | A,G | A,G | Heterozygous CTC subset of CPP |
| chr21 | 34926260 | C | C,T | C,T | Heterozygous CTC subset of CPP |
| chr21 | 34927447 | C | C   | C   | Heterozygous CTC subset of CPP |
| chr21 | 35275840 | T | T   | T   | Heterozygous CTC subset of CPP |
| chr21 | 35281421 | T | C,T | C,T | Heterozygous CTC subset of CPP |
| chr21 | 37442632 | G | C,G | G   | Heterozygous CTC subset of CPP |
| chr21 | 37443354 | A | A   | A   | Heterozygous CTC subset of CPP |
| chr21 | 37444973 | C | C,T | C   | Heterozygous CTC subset of CPP |
| chr21 | 38524242 | C | C   | C   | Heterozygous CTC subset of CPP |
| chr21 | 38525356 | T | C,T | C   | Heterozygous CTC subset of CPP |
| chr21 | 38538679 | A | A   | A   | Heterozygous CTC subset of CPP |
| chr21 | 38563678 | T | T   | T   | Heterozygous CTC subset of CPP |
| chr21 | 38568009 | G | C,G | C   | Heterozygous CTC subset of CPP |
| chr21 | 38568308 | C | C,T | T   | Heterozygous CTC subset of CPP |
| chr21 | 38858836 | C | C   | C   | Heterozygous CTC subset of CPP |
| chr21 | 38877664 | G | G   | G   | Heterozygous CTC subset of CPP |
| chr21 | 40178042 | A | A   | A   | Heterozygous CTC subset of CPP |
| chr21 | 40178043 | G | G   | G   | Heterozygous CTC subset of CPP |
| chr21 | 40186706 | C | C   | C   | Heterozygous CTC subset of CPP |
| chr21 | 40547531 | A | A   | A   | Heterozygous CTC subset of CPP |
| chr21 | 40549466 | T | C,T | T   | Heterozygous CTC subset of CPP |
| chr21 | 40552307 | A | A,G | G   | Heterozygous CTC subset of CPP |
| chr21 | 40714866 | T | T   | T   | Heterozygous CTC subset of CPP |
| chr21 | 42615340 | A | A   | A   | Heterozygous CTC subset of CPP |

Grillet et al., Supplementary Table 5

|       |          |   |      |      |                                |
|-------|----------|---|------|------|--------------------------------|
| chr21 | 42622786 | C | C,T  | C,T  | Heterozygous CTC subset of CPP |
| chr21 | 44293744 | C | C,G  | G    | Heterozygous CTC subset of CPP |
| chr21 | 44513296 | A | A,G  | A    | Heterozygous CTC subset of CPP |
| chr21 | 44514829 | T | G,T  | T    | Heterozygous CTC subset of CPP |
| chr21 | 45107756 | G | G    | G    | Heterozygous CTC subset of CPP |
| chr21 | 45168884 | G | A,G  | G    | Heterozygous CTC subset of CPP |
| chr21 | 45217559 | T | C,T  | T    | Heterozygous CTC subset of CPP |
| chr21 | 45217929 | T | C,T  | T    | Heterozygous CTC subset of CPP |
| chr21 | 45219524 | T | C,T  | T    | Heterozygous CTC subset of CPP |
| chr21 | 45220483 | A | A,G  | A    | Heterozygous CTC subset of CPP |
| chr21 | 45389034 | C | C,T  | C    | Heterozygous CTC subset of CPP |
| chr21 | 45390676 | T | T    | T    | Heterozygous CTC subset of CPP |
| chr21 | 45472274 | G | G    | G    | Heterozygous CTC subset of CPP |
| chr21 | 45537814 | T | T    | T    | Heterozygous CTC subset of CPP |
| chr21 | 45538647 | T | C,T  | C    | Heterozygous CTC subset of CPP |
| chr21 | 45538688 | G | G    | G    | Heterozygous CTC subset of CPP |
| chr21 | 45540919 | A | A,G  | G    | Heterozygous CTC subset of CPP |
| chr21 | 45553596 | T | C    | C    | Heterozygous CTC subset of CPP |
| chr21 | 45560224 | G | G    | G    | Heterozygous CTC subset of CPP |
| chr21 | 45564711 | C | C,T  | C    | Heterozygous CTC subset of CPP |
| chr21 | 46935727 | T | T    | T    | Heterozygous CTC subset of CPP |
| chr21 | 47609677 | A | A,G  | G    | Heterozygous CTC subset of CPP |
| chr21 | 47614443 | A | A,G  | A,G  | Heterozygous CTC subset of CPP |
| chr21 | 47614469 | A | A,C  | C    | Heterozygous CTC subset of CPP |
| chr21 | 47626598 | A | A    | A    | Heterozygous CTC subset of CPP |
| chr21 | 47633734 | T | T    | T    | Heterozygous CTC subset of CPP |
| chr21 | 47641794 | C | C    | C    | Heterozygous CTC subset of CPP |
| chr21 | 47642609 | G | G    | G    | Heterozygous CTC subset of CPP |
| chr22 | 17630486 | C | A,C  | C    | Heterozygous CTC subset of CPP |
| chr22 | 17640045 | G | A,G  | A    | Heterozygous CTC subset of CPP |
| chr22 | 18111431 | T | C,T  | T    | Heterozygous CTC subset of CPP |
| chr22 | 18166087 | G | G    | G    | Heterozygous CTC subset of CPP |
| chr22 | 18209613 | A | A,G  | A,G  | Heterozygous CTC subset of CPP |
| chr22 | 18209718 | C | C,T  | C    | Heterozygous CTC subset of CPP |
| chr22 | 18220831 | A | A,G  | A    | Heterozygous CTC subset of CPP |
| chr22 | 18226570 | T | T    | T    | Heterozygous CTC subset of CPP |
| chr22 | 19459230 | T | T    | T    | Heterozygous CTC subset of CPP |
| chr22 | 19789600 | T | T    | T    | Heterozygous CTC subset of CPP |
| chr22 | 19907099 | C | A,C  | A,C  | Heterozygous CTC subset of CPP |
| chr22 | 19907118 | G | A,G  | A,G  | Heterozygous CTC subset of CPP |
| chr22 | 19950235 | C | C,T  | C,T  | Heterozygous CTC subset of CPP |
| chr22 | 19951207 | C | C,G  | C,G  | Heterozygous CTC subset of CPP |
| chr22 | 19951271 | G | A,G  | A,G  | Heterozygous CTC subset of CPP |
| chr22 | 19951816 | C | C,T  | C    | Heterozygous CTC subset of CPP |
| chr22 | 19956262 | G | +C,G | +C,G | Heterozygous CTC subset of CPP |
| chr22 | 20112858 | A | A    | A    | Heterozygous CTC subset of CPP |

Grillet et al., Supplementary Table 5

|       |          |   |     |     |                                |
|-------|----------|---|-----|-----|--------------------------------|
| chr22 | 20303703 | T | T   | T   | Heterozygous CTC subset of CPP |
| chr22 | 21088818 | G | G   | G   | Heterozygous CTC subset of CPP |
| chr22 | 21159359 | T | T   | T   | Heterozygous CTC subset of CPP |
| chr22 | 21213622 | T | T   | T   | Heterozygous CTC subset of CPP |
| chr22 | 21354970 | C | C,G | G   | Heterozygous CTC subset of CPP |
| chr22 | 21982892 | C | C,T | C   | Heterozygous CTC subset of CPP |
| chr22 | 21983853 | G | A,G | G   | Heterozygous CTC subset of CPP |
| chr22 | 21997178 | T | T   | T   | Heterozygous CTC subset of CPP |
| chr22 | 23524372 | A | A   | A   | Heterozygous CTC subset of CPP |
| chr22 | 23596117 | A | A   | A   | Heterozygous CTC subset of CPP |
| chr22 | 23596167 | G | G   | G   | Heterozygous CTC subset of CPP |
| chr22 | 23627226 | G | G   | G   | Heterozygous CTC subset of CPP |
| chr22 | 23627267 | T | T   | T   | Heterozygous CTC subset of CPP |
| chr22 | 23627356 | T | T   | T   | Heterozygous CTC subset of CPP |
| chr22 | 24108450 | C | C   | C   | Heterozygous CTC subset of CPP |
| chr22 | 24237400 | T | T   | T   | Heterozygous CTC subset of CPP |
| chr22 | 24939982 | C | C,T | C   | Heterozygous CTC subset of CPP |
| chr22 | 28269803 | C | C   | C   | Heterozygous CTC subset of CPP |
| chr22 | 28292551 | T | T   | T   | Heterozygous CTC subset of CPP |
| chr22 | 29196534 | C | A,C | C   | Heterozygous CTC subset of CPP |
| chr22 | 29439340 | T | T   | T   | Heterozygous CTC subset of CPP |
| chr22 | 29445581 | A | A   | A   | Heterozygous CTC subset of CPP |
| chr22 | 29445942 | C | C,T | C   | Heterozygous CTC subset of CPP |
| chr22 | 29669846 | T | T   | T   | Heterozygous CTC subset of CPP |
| chr22 | 29684735 | A | A   | A   | Heterozygous CTC subset of CPP |
| chr22 | 29692358 | G | G   | G   | Heterozygous CTC subset of CPP |
| chr22 | 29694881 | A | A   | A   | Heterozygous CTC subset of CPP |
| chr22 | 29727866 | C | C,T | C,T | Heterozygous CTC subset of CPP |
| chr22 | 29754878 | T | T   | T   | Heterozygous CTC subset of CPP |
| chr22 | 29755888 | T | C,T | T   | Heterozygous CTC subset of CPP |
| chr22 | 30051606 | T | T   | T   | Heterozygous CTC subset of CPP |
| chr22 | 30074308 | G | G   | G   | Heterozygous CTC subset of CPP |
| chr22 | 30196984 | T | T   | T   | Heterozygous CTC subset of CPP |
| chr22 | 30234218 | A | A   | A   | Heterozygous CTC subset of CPP |
| chr22 | 30733111 | C | A,C | A,C | Heterozygous CTC subset of CPP |
| chr22 | 30733705 | C | C   | C   | Heterozygous CTC subset of CPP |
| chr22 | 30823254 | T | T   | T   | Heterozygous CTC subset of CPP |
| chr22 | 30823363 | T | T   | T   | Heterozygous CTC subset of CPP |
| chr22 | 30977353 | T | A,T | T   | Heterozygous CTC subset of CPP |
| chr22 | 31330090 | C | C   | C   | Heterozygous CTC subset of CPP |
| chr22 | 31333631 | T | C,T | C,T | Heterozygous CTC subset of CPP |
| chr22 | 31333944 | C | C   | C   | Heterozygous CTC subset of CPP |
| chr22 | 31342376 | G | C,G | C,G | Heterozygous CTC subset of CPP |
| chr22 | 31485928 | A | A   | A   | Heterozygous CTC subset of CPP |
| chr22 | 31491404 | T | T   | T   | Heterozygous CTC subset of CPP |
| chr22 | 31495802 | C | C   | C   | Heterozygous CTC subset of CPP |



Grillet et al., Supplementary Table 5

|       |          |   |     |     |                                |
|-------|----------|---|-----|-----|--------------------------------|
| chr22 | 31740615 | T | T   | T   | Heterozygous CTC subset of CPP |
| chr22 | 31740799 | T | T   | T   | Heterozygous CTC subset of CPP |
| chr22 | 31741067 | G | A,G | G   | Heterozygous CTC subset of CPP |
| chr22 | 32015637 | T | T   | T   | Heterozygous CTC subset of CPP |
| chr22 | 32435841 | T | T   | T   | Heterozygous CTC subset of CPP |
| chr22 | 32875190 | G | A,G | A,G | Heterozygous CTC subset of CPP |
| chr22 | 32880006 | A | A,G | A   | Heterozygous CTC subset of CPP |
| chr22 | 32881171 | T | T   | T   | Heterozygous CTC subset of CPP |
| chr22 | 32887150 | C | C,T | C,T | Heterozygous CTC subset of CPP |
| chr22 | 32889231 | A | A   | A   | Heterozygous CTC subset of CPP |
| chr22 | 36684980 | G | A,G | G   | Heterozygous CTC subset of CPP |
| chr22 | 36691691 | T | C,T | T   | Heterozygous CTC subset of CPP |
| chr22 | 37962588 | C | C,T | C   | Heterozygous CTC subset of CPP |
| chr22 | 37964299 | C | C   | C   | Heterozygous CTC subset of CPP |
| chr22 | 38039708 | T | C,T | T   | Heterozygous CTC subset of CPP |
| chr22 | 38086749 | A | A   | A   | Heterozygous CTC subset of CPP |
| chr22 | 38259352 | G | G   | G   | Heterozygous CTC subset of CPP |
| chr22 | 38336757 | A | A   | A   | Heterozygous CTC subset of CPP |
| chr22 | 38363694 | G | G   | G   | Heterozygous CTC subset of CPP |
| chr22 | 38690349 | A | A   | A   | Heterozygous CTC subset of CPP |
| chr22 | 39145864 | C | A,C | C   | Heterozygous CTC subset of CPP |
| chr22 | 39712815 | A | A   | A   | Heterozygous CTC subset of CPP |
| chr22 | 39714490 | C | C,T | T   | Heterozygous CTC subset of CPP |
| chr22 | 39917515 | A | A,C | A   | Heterozygous CTC subset of CPP |
| chr22 | 39917789 | T | T   | T   | Heterozygous CTC subset of CPP |
| chr22 | 40742551 | C | C   | C   | Heterozygous CTC subset of CPP |
| chr22 | 40798151 | G | A,G | G   | Heterozygous CTC subset of CPP |
| chr22 | 40800654 | A | A   | A   | Heterozygous CTC subset of CPP |
| chr22 | 41252457 | A | A   | A   | Heterozygous CTC subset of CPP |
| chr22 | 41752728 | A | A   | A   | Heterozygous CTC subset of CPP |
| chr22 | 41752747 | G | A,G | A,G | Heterozygous CTC subset of CPP |
| chr22 | 41753431 | T | T   | T   | Heterozygous CTC subset of CPP |
| chr22 | 41832816 | G | G   | G   | Heterozygous CTC subset of CPP |
| chr22 | 41833116 | C | C,T | C,T | Heterozygous CTC subset of CPP |
| chr22 | 41833330 | A | A   | A   | Heterozygous CTC subset of CPP |
| chr22 | 41903813 | A | A,C | A,C | Heterozygous CTC subset of CPP |
| chr22 | 41913620 | A | A   | A   | Heterozygous CTC subset of CPP |
| chr22 | 41918875 | G | G   | G   | Heterozygous CTC subset of CPP |
| chr22 | 41922458 | G | G   | G   | Heterozygous CTC subset of CPP |
| chr22 | 41923903 | A | A   | A   | Heterozygous CTC subset of CPP |
| chr22 | 41923904 | G | G   | G   | Heterozygous CTC subset of CPP |
| chr22 | 41936722 | A | A   | A   | Heterozygous CTC subset of CPP |
| chr22 | 42059768 | G | G,T | G   | Heterozygous CTC subset of CPP |
| chr22 | 42276742 | G | C,G | C,G | Heterozygous CTC subset of CPP |
| chr22 | 42301712 | T | C,T | C,T | Heterozygous CTC subset of CPP |
| chr22 | 42341308 | A | A,G | A   | Heterozygous CTC subset of CPP |

Grillet et al., Supplementary Table 5

|       |          |   |      |      |                                |
|-------|----------|---|------|------|--------------------------------|
| chr22 | 42343091 | G | A,G  | G    | Heterozygous CTC subset of CPP |
| chr22 | 42486723 | G | A,G  | G    | Heterozygous CTC subset of CPP |
| chr22 | 42606213 | A | A    | A    | Heterozygous CTC subset of CPP |
| chr22 | 42606322 | T | T    | T    | Heterozygous CTC subset of CPP |
| chr22 | 42607187 | A | A    | A    | Heterozygous CTC subset of CPP |
| chr22 | 42609080 | A | A    | A    | Heterozygous CTC subset of CPP |
| chr22 | 42609209 | A | A    | A    | Heterozygous CTC subset of CPP |
| chr22 | 42609770 | A | A    | A    | Heterozygous CTC subset of CPP |
| chr22 | 42610463 | A | A    | A    | Heterozygous CTC subset of CPP |
| chr22 | 43195109 | T | C,T  | T    | Heterozygous CTC subset of CPP |
| chr22 | 43278220 | C | C,T  | C,T  | Heterozygous CTC subset of CPP |
| chr22 | 43289473 | G | A,G  | A,G  | Heterozygous CTC subset of CPP |
| chr22 | 43576843 | T | T    | T    | Heterozygous CTC subset of CPP |
| chr22 | 44372632 | C | C,T  | C,T  | Heterozygous CTC subset of CPP |
| chr22 | 46068059 | G | G    | G    | Heterozygous CTC subset of CPP |
| chr22 | 46749704 | T | T    | T    | Heterozygous CTC subset of CPP |
| chr22 | 50216675 | T | T    | T    | Heterozygous CTC subset of CPP |
| chr22 | 50279063 | A | A    | A    | Heterozygous CTC subset of CPP |
| chr22 | 50313847 | A | A    | A    | Heterozygous CTC subset of CPP |
| chr22 | 50356693 | T | C,T  | C    | Heterozygous CTC subset of CPP |
| chr22 | 50637530 | T | T    | T    | Heterozygous CTC subset of CPP |
| chr22 | 50716167 | G | A,G  | A,G  | Heterozygous CTC subset of CPP |
| chr22 | 50719251 | A | A,G  | A,G  | Heterozygous CTC subset of CPP |
| chr22 | 50720622 | C | C,T  | C,T  | Heterozygous CTC subset of CPP |
| chr22 | 50722408 | T | C,T  | C,T  | Heterozygous CTC subset of CPP |
| chr22 | 50724527 | C | C    | C    | Heterozygous CTC subset of CPP |
| chr22 | 50725553 | T | C,T  | T    | Heterozygous CTC subset of CPP |
| chr22 | 50861947 | T | T    | T    | Heterozygous CTC subset of CPP |
| chr22 | 50905877 | T | T    | T    | Heterozygous CTC subset of CPP |
| chr22 | 50962201 | T | T    | T    | Heterozygous CTC subset of CPP |
| chr22 | 50962208 | T | G,T  | G,T  | Heterozygous CTC subset of CPP |
| chr3  | 5164111  | T | T    | T    | Heterozygous CTC subset of CPP |
| chr3  | 9422188  | G | G    | G    | Heterozygous CTC subset of CPP |
| chr3  | 9422210  | T | C,T  | C,T  | Heterozygous CTC subset of CPP |
| chr3  | 9426220  | A | A    | A    | Heterozygous CTC subset of CPP |
| chr3  | 9426224  | G | A,G  | G    | Heterozygous CTC subset of CPP |
| chr3  | 9482280  | C | C    | C    | Heterozygous CTC subset of CPP |
| chr3  | 9486883  | A | A    | A    | Heterozygous CTC subset of CPP |
| chr3  | 9489381  | A | A,G  | A    | Heterozygous CTC subset of CPP |
| chr3  | 9506263  | A | A    | A    | Heterozygous CTC subset of CPP |
| chr3  | 9882262  | T | T    | T    | Heterozygous CTC subset of CPP |
| chr3  | 9885204  | G | G    | G    | Heterozygous CTC subset of CPP |
| chr3  | 9934605  | T | C,T  | C,T  | Heterozygous CTC subset of CPP |
| chr3  | 10188320 | G | G    | G    | Heterozygous CTC subset of CPP |
| chr3  | 10302208 | A | A    | A    | Heterozygous CTC subset of CPP |
| chr3  | 12633290 | T | +C,T | +C,T | Heterozygous CTC subset of CPP |

Grillet et al., Supplementary Table 5

|      |          |   |      |     |                                |
|------|----------|---|------|-----|--------------------------------|
| chr3 | 12650748 | A | A    | A   | Heterozygous CTC subset of CPP |
| chr3 | 12877704 | G | A,G  | G   | Heterozygous CTC subset of CPP |
| chr3 | 13361287 | C | C    | C   | Heterozygous CTC subset of CPP |
| chr3 | 13361391 | A | A,G  | A,G | Heterozygous CTC subset of CPP |
| chr3 | 13364876 | G | G    | G   | Heterozygous CTC subset of CPP |
| chr3 | 13367406 | C | C,T  | C   | Heterozygous CTC subset of CPP |
| chr3 | 13368892 | G | A,G  | A   | Heterozygous CTC subset of CPP |
| chr3 | 13372034 | T | T    | T   | Heterozygous CTC subset of CPP |
| chr3 | 13379400 | C | C,T  | T   | Heterozygous CTC subset of CPP |
| chr3 | 13399786 | G | A,G  | A   | Heterozygous CTC subset of CPP |
| chr3 | 13421150 | C | T    | T   | Heterozygous CTC subset of CPP |
| chr3 | 14174427 | A | A,T  | A   | Heterozygous CTC subset of CPP |
| chr3 | 14175262 | T | C,T  | T   | Heterozygous CTC subset of CPP |
| chr3 | 14485324 | T | T    | T   | Heterozygous CTC subset of CPP |
| chr3 | 14487270 | T | T    | T   | Heterozygous CTC subset of CPP |
| chr3 | 14508042 | A | A    | A   | Heterozygous CTC subset of CPP |
| chr3 | 14523248 | T | T    | T   | Heterozygous CTC subset of CPP |
| chr3 | 20025665 | G | +A,G | G   | Heterozygous CTC subset of CPP |
| chr3 | 25674205 | A | A    | A   | Heterozygous CTC subset of CPP |
| chr3 | 25678799 | A | A    | A   | Heterozygous CTC subset of CPP |
| chr3 | 25679738 | T | C,T  | C,T | Heterozygous CTC subset of CPP |
| chr3 | 28304843 | C | C    | C   | Heterozygous CTC subset of CPP |
| chr3 | 28304844 | A | A    | A   | Heterozygous CTC subset of CPP |
| chr3 | 28357877 | A | A    | A   | Heterozygous CTC subset of CPP |
| chr3 | 32533246 | T | T    | T   | Heterozygous CTC subset of CPP |
| chr3 | 32578505 | T | C,T  | T   | Heterozygous CTC subset of CPP |
| chr3 | 33038571 | T | T    | T   | Heterozygous CTC subset of CPP |
| chr3 | 33099651 | A | A    | A   | Heterozygous CTC subset of CPP |
| chr3 | 33099682 | A | A    | A   | Heterozygous CTC subset of CPP |
| chr3 | 33138549 | G | A,G  | A   | Heterozygous CTC subset of CPP |
| chr3 | 33174156 | T | G,T  | G   | Heterozygous CTC subset of CPP |
| chr3 | 33174168 | G | A,G  | A   | Heterozygous CTC subset of CPP |
| chr3 | 33434831 | G | A,G  | A,G | Heterozygous CTC subset of CPP |
| chr3 | 33434837 | A | A    | A   | Heterozygous CTC subset of CPP |
| chr3 | 33458266 | T | C,T  | T   | Heterozygous CTC subset of CPP |
| chr3 | 33458290 | T | T    | T   | Heterozygous CTC subset of CPP |
| chr3 | 33877626 | G | A,G  | G   | Heterozygous CTC subset of CPP |
| chr3 | 33879770 | G | A,G  | A,G | Heterozygous CTC subset of CPP |
| chr3 | 33895391 | A | A,G  | A   | Heterozygous CTC subset of CPP |
| chr3 | 33905566 | C | C,T  | C   | Heterozygous CTC subset of CPP |
| chr3 | 33907945 | A | A,G  | A   | Heterozygous CTC subset of CPP |
| chr3 | 37292909 | A | A    | A   | Heterozygous CTC subset of CPP |
| chr3 | 37343794 | G | G    | G   | Heterozygous CTC subset of CPP |
| chr3 | 37366007 | T | T    | T   | Heterozygous CTC subset of CPP |
| chr3 | 37366459 | C | A,C  | A   | Heterozygous CTC subset of CPP |
| chr3 | 37367618 | T | T    | T   | Heterozygous CTC subset of CPP |

Grillet et al., Supplementary Table 5

|      |          |   |        |        |                                |
|------|----------|---|--------|--------|--------------------------------|
| chr3 | 37367877 | T | T      | T      | Heterozygous CTC subset of CPP |
| chr3 | 37368116 | T | T      | T      | Heterozygous CTC subset of CPP |
| chr3 | 37368117 | T | T      | T      | Heterozygous CTC subset of CPP |
| chr3 | 37368313 | C | C      | C      | Heterozygous CTC subset of CPP |
| chr3 | 37368755 | T | A,T    | A      | Heterozygous CTC subset of CPP |
| chr3 | 38024084 | T | T      | T      | Heterozygous CTC subset of CPP |
| chr3 | 38024133 | A | A      | A      | Heterozygous CTC subset of CPP |
| chr3 | 38170810 | C | C,G    | C,G    | Heterozygous CTC subset of CPP |
| chr3 | 38266088 | T | T      | T      | Heterozygous CTC subset of CPP |
| chr3 | 38287566 | C | C      | C      | Heterozygous CTC subset of CPP |
| chr3 | 39450198 | T | T      | T      | Heterozygous CTC subset of CPP |
| chr3 | 42236415 | A | A,G    | A,G    | Heterozygous CTC subset of CPP |
| chr3 | 42251263 | C | C,T    | C,T    | Heterozygous CTC subset of CPP |
| chr3 | 42827596 | T | T      | T      | Heterozygous CTC subset of CPP |
| chr3 | 42835665 | T | T      | T      | Heterozygous CTC subset of CPP |
| chr3 | 44968301 | A | A      | A      | Heterozygous CTC subset of CPP |
| chr3 | 45000672 | A | A      | A      | Heterozygous CTC subset of CPP |
| chr3 | 45052745 | A | A      | A      | Heterozygous CTC subset of CPP |
| chr3 | 45052775 | G | C,G    | C,G    | Heterozygous CTC subset of CPP |
| chr3 | 47045739 | C | C,G    | C,G    | Heterozygous CTC subset of CPP |
| chr3 | 47058686 | T | T      | T      | Heterozygous CTC subset of CPP |
| chr3 | 47125520 | A | A      | A      | Heterozygous CTC subset of CPP |
| chr3 | 47459907 | G | G      | G      | Heterozygous CTC subset of CPP |
| chr3 | 47468946 | T | T      | T      | Heterozygous CTC subset of CPP |
| chr3 | 47888491 | G | G      | G      | Heterozygous CTC subset of CPP |
| chr3 | 47891044 | G | G      | G      | Heterozygous CTC subset of CPP |
| chr3 | 47956424 | C | C,T    | C,T    | Heterozygous CTC subset of CPP |
| chr3 | 47958037 | G | G,T    | G,T    | Heterozygous CTC subset of CPP |
| chr3 | 48638801 | C | C,T    | C      | Heterozygous CTC subset of CPP |
| chr3 | 48663787 | C | C      | C      | Heterozygous CTC subset of CPP |
| chr3 | 48664069 | C | C      | C      | Heterozygous CTC subset of CPP |
| chr3 | 48810506 | T | G,T    | T      | Heterozygous CTC subset of CPP |
| chr3 | 48885026 | T | T      | T      | Heterozygous CTC subset of CPP |
| chr3 | 49053219 | A | A,G    | G      | Heterozygous CTC subset of CPP |
| chr3 | 49061781 | G | G      | G      | Heterozygous CTC subset of CPP |
| chr3 | 49095284 | C | C,T    | C      | Heterozygous CTC subset of CPP |
| chr3 | 49151612 | T | T      | T      | Heterozygous CTC subset of CPP |
| chr3 | 49412865 | A | +A,A,T | +A,A,T | Heterozygous CTC subset of CPP |
| chr3 | 49924940 | T | C      | C      | Heterozygous CTC subset of CPP |
| chr3 | 49936021 | T | T      | T      | Heterozygous CTC subset of CPP |
| chr3 | 50005854 | A | A      | A      | Heterozygous CTC subset of CPP |
| chr3 | 50152995 | C | C      | C      | Heterozygous CTC subset of CPP |
| chr3 | 50296330 | G | G      | G      | Heterozygous CTC subset of CPP |
| chr3 | 50296331 | A | A      | A      | Heterozygous CTC subset of CPP |
| chr3 | 50327818 | C | -C,C   | -C,C   | Heterozygous CTC subset of CPP |
| chr3 | 50357226 | A | A      | A      | Heterozygous CTC subset of CPP |

Grillet et al., Supplementary Table 5

|      |          |   |      |      |                                |
|------|----------|---|------|------|--------------------------------|
| chr3 | 50655018 | G | G    | G    | Heterozygous CTC subset of CPP |
| chr3 | 50677936 | G | G    | G    | Heterozygous CTC subset of CPP |
| chr3 | 51422766 | G | G,T  | G,T  | Heterozygous CTC subset of CPP |
| chr3 | 51423696 | T | C,T  | T    | Heterozygous CTC subset of CPP |
| chr3 | 51428887 | C | C,G  | C    | Heterozygous CTC subset of CPP |
| chr3 | 51430657 | A | A    | A    | Heterozygous CTC subset of CPP |
| chr3 | 52263967 | G | A,G  | G    | Heterozygous CTC subset of CPP |
| chr3 | 52264907 | T | C,T  | C,T  | Heterozygous CTC subset of CPP |
| chr3 | 52293859 | A | A,G  | A,G  | Heterozygous CTC subset of CPP |
| chr3 | 52563304 | G | A,G  | G    | Heterozygous CTC subset of CPP |
| chr3 | 52595931 | T | T    | T    | Heterozygous CTC subset of CPP |
| chr3 | 52643902 | A | A    | A    | Heterozygous CTC subset of CPP |
| chr3 | 52729460 | T | T    | T    | Heterozygous CTC subset of CPP |
| chr3 | 53217550 | G | G    | G    | Heterozygous CTC subset of CPP |
| chr3 | 53267183 | C | C,T  | C    | Heterozygous CTC subset of CPP |
| chr3 | 53269028 | G | G,T  | G    | Heterozygous CTC subset of CPP |
| chr3 | 53899074 | T | T    | T    | Heterozygous CTC subset of CPP |
| chr3 | 56658512 | T | T    | T    | Heterozygous CTC subset of CPP |
| chr3 | 56667540 | T | T    | T    | Heterozygous CTC subset of CPP |
| chr3 | 56667682 | G | C,G  | G    | Heterozygous CTC subset of CPP |
| chr3 | 56675657 | G | A,G  | G    | Heterozygous CTC subset of CPP |
| chr3 | 56703746 | A | A,C  | A    | Heterozygous CTC subset of CPP |
| chr3 | 56716922 | T | G,T  | T    | Heterozygous CTC subset of CPP |
| chr3 | 57303630 | A | A    | A    | Heterozygous CTC subset of CPP |
| chr3 | 57843877 | A | A    | A    | Heterozygous CTC subset of CPP |
| chr3 | 57846501 | A | A    | A    | Heterozygous CTC subset of CPP |
| chr3 | 57882601 | C | C,T  | C,T  | Heterozygous CTC subset of CPP |
| chr3 | 58081888 | T | C,T  | C,T  | Heterozygous CTC subset of CPP |
| chr3 | 58089731 | T | T    | T    | Heterozygous CTC subset of CPP |
| chr3 | 58090900 | G | A,G  | G    | Heterozygous CTC subset of CPP |
| chr3 | 58090941 | T | T    | T    | Heterozygous CTC subset of CPP |
| chr3 | 58109162 | G | A,G  | A,G  | Heterozygous CTC subset of CPP |
| chr3 | 58112440 | A | G    | G    | Heterozygous CTC subset of CPP |
| chr3 | 58112488 | C | C,T  | C,T  | Heterozygous CTC subset of CPP |
| chr3 | 58118555 | G | A,G  | A,G  | Heterozygous CTC subset of CPP |
| chr3 | 58134505 | A | A,G  | A    | Heterozygous CTC subset of CPP |
| chr3 | 58141791 | A | A    | A    | Heterozygous CTC subset of CPP |
| chr3 | 58154327 | C | C,T  | C,T  | Heterozygous CTC subset of CPP |
| chr3 | 58416535 | C | C,T  | C    | Heterozygous CTC subset of CPP |
| chr3 | 63824117 | T | T    | T    | Heterozygous CTC subset of CPP |
| chr3 | 69151152 | C | A,C  | C    | Heterozygous CTC subset of CPP |
| chr3 | 71027064 | G | G    | G    | Heterozygous CTC subset of CPP |
| chr3 | 97664659 | T | T    | T    | Heterozygous CTC subset of CPP |
| chr3 | 97686273 | G | +A,G | +A,G | Heterozygous CTC subset of CPP |
| chr3 | 98240046 | C | C    | C    | Heterozygous CTC subset of CPP |
| chr3 | 98307630 | C | C,T  | C    | Heterozygous CTC subset of CPP |

Grillet et al., Supplementary Table 5

|      |           |   |      |     |                                |
|------|-----------|---|------|-----|--------------------------------|
| chr3 | 98311834  | C | C    | C   | Heterozygous CTC subset of CPP |
| chr3 | 98530373  | A | A    | A   | Heterozygous CTC subset of CPP |
| chr3 | 98538142  | C | C    | C   | Heterozygous CTC subset of CPP |
| chr3 | 98568440  | T | T    | T   | Heterozygous CTC subset of CPP |
| chr3 | 98600543  | T | T    | T   | Heterozygous CTC subset of CPP |
| chr3 | 98600544  | C | C    | C   | Heterozygous CTC subset of CPP |
| chr3 | 99886662  | G | A,G  | G   | Heterozygous CTC subset of CPP |
| chr3 | 100057993 | G | A,G  | G   | Heterozygous CTC subset of CPP |
| chr3 | 100065098 | A | A    | A   | Heterozygous CTC subset of CPP |
| chr3 | 101284008 | C | C    | C   | Heterozygous CTC subset of CPP |
| chr3 | 101284828 | A | A    | A   | Heterozygous CTC subset of CPP |
| chr3 | 101298825 | A | A    | A   | Heterozygous CTC subset of CPP |
| chr3 | 107778335 | T | T    | T   | Heterozygous CTC subset of CPP |
| chr3 | 111700708 | A | A    | A   | Heterozygous CTC subset of CPP |
| chr3 | 113786910 | G | G    | G   | Heterozygous CTC subset of CPP |
| chr3 | 113798824 | G | G    | G   | Heterozygous CTC subset of CPP |
| chr3 | 119219573 | A | A,G  | A   | Heterozygous CTC subset of CPP |
| chr3 | 119236104 | G | A,G  | G   | Heterozygous CTC subset of CPP |
| chr3 | 120054800 | A | A    | A   | Heterozygous CTC subset of CPP |
| chr3 | 120320042 | A | A    | A   | Heterozygous CTC subset of CPP |
| chr3 | 120428665 | A | A    | A   | Heterozygous CTC subset of CPP |
| chr3 | 120428756 | C | C    | C   | Heterozygous CTC subset of CPP |
| chr3 | 121412892 | A | A,G  | A,G | Heterozygous CTC subset of CPP |
| chr3 | 121415720 | T | C,T  | T   | Heterozygous CTC subset of CPP |
| chr3 | 121415773 | T | T    | T   | Heterozygous CTC subset of CPP |
| chr3 | 121417408 | A | A    | A   | Heterozygous CTC subset of CPP |
| chr3 | 121547750 | T | T    | T   | Heterozygous CTC subset of CPP |
| chr3 | 122808105 | A | A    | A   | Heterozygous CTC subset of CPP |
| chr3 | 122864436 | G | A,G  | G   | Heterozygous CTC subset of CPP |
| chr3 | 123633754 | A | A    | A   | Heterozygous CTC subset of CPP |
| chr3 | 124449473 | A | A    | A   | Heterozygous CTC subset of CPP |
| chr3 | 124456742 | G | C,G  | G   | Heterozygous CTC subset of CPP |
| chr3 | 124462808 | C | C,T  | C   | Heterozygous CTC subset of CPP |
| chr3 | 124462987 | T | -T,T | T   | Heterozygous CTC subset of CPP |
| chr3 | 124483246 | A | A,T  | A   | Heterozygous CTC subset of CPP |
| chr3 | 124515308 | A | A,G  | A   | Heterozygous CTC subset of CPP |
| chr3 | 126180415 | T | T    | T   | Heterozygous CTC subset of CPP |
| chr3 | 126733470 | G | G    | G   | Heterozygous CTC subset of CPP |
| chr3 | 127295835 | T | T    | T   | Heterozygous CTC subset of CPP |
| chr3 | 127323830 | C | C,T  | C,T | Heterozygous CTC subset of CPP |
| chr3 | 127324967 | G | A,G  | G   | Heterozygous CTC subset of CPP |
| chr3 | 127379270 | C | C,T  | C   | Heterozygous CTC subset of CPP |
| chr3 | 127379802 | C | C    | C   | Heterozygous CTC subset of CPP |
| chr3 | 127778956 | A | A,C  | A   | Heterozygous CTC subset of CPP |
| chr3 | 128126988 | C | C    | C   | Heterozygous CTC subset of CPP |
| chr3 | 128344786 | G | A,G  | G   | Heterozygous CTC subset of CPP |

Grillet et al., Supplementary Table 5

|      |           |   |     |     |                                |
|------|-----------|---|-----|-----|--------------------------------|
| chr3 | 128525253 | C | C,T | C   | Heterozygous CTC subset of CPP |
| chr3 | 128614185 | A | A,C | A,C | Heterozygous CTC subset of CPP |
| chr3 | 128631359 | A | A   | A   | Heterozygous CTC subset of CPP |
| chr3 | 128631518 | C | C   | C   | Heterozygous CTC subset of CPP |
| chr3 | 129155561 | A | A   | A   | Heterozygous CTC subset of CPP |
| chr3 | 130653479 | T | T   | T   | Heterozygous CTC subset of CPP |
| chr3 | 130672819 | A | A   | A   | Heterozygous CTC subset of CPP |
| chr3 | 130716576 | T | T   | T   | Heterozygous CTC subset of CPP |
| chr3 | 132384909 | A | A   | A   | Heterozygous CTC subset of CPP |
| chr3 | 132389093 | A | A   | A   | Heterozygous CTC subset of CPP |
| chr3 | 132394148 | A | A   | A   | Heterozygous CTC subset of CPP |
| chr3 | 132395354 | A | A   | A   | Heterozygous CTC subset of CPP |
| chr3 | 132395682 | A | A   | A   | Heterozygous CTC subset of CPP |
| chr3 | 133327488 | G | G   | G   | Heterozygous CTC subset of CPP |
| chr3 | 133331395 | A | A   | A   | Heterozygous CTC subset of CPP |
| chr3 | 133368725 | T | T   | T   | Heterozygous CTC subset of CPP |
| chr3 | 133894471 | G | C,G | G   | Heterozygous CTC subset of CPP |
| chr3 | 133896843 | C | C   | C   | Heterozygous CTC subset of CPP |
| chr3 | 133921634 | A | A   | A   | Heterozygous CTC subset of CPP |
| chr3 | 133930393 | A | A   | A   | Heterozygous CTC subset of CPP |
| chr3 | 139102169 | T | T   | T   | Heterozygous CTC subset of CPP |
| chr3 | 142388320 | C | C   | C   | Heterozygous CTC subset of CPP |
| chr3 | 142430826 | A | A   | A   | Heterozygous CTC subset of CPP |
| chr3 | 142773947 | C | C   | C   | Heterozygous CTC subset of CPP |
| chr3 | 145806413 | T | T   | T   | Heterozygous CTC subset of CPP |
| chr3 | 145828178 | T | T   | T   | Heterozygous CTC subset of CPP |
| chr3 | 146234853 | C | C,T | C   | Heterozygous CTC subset of CPP |
| chr3 | 146251280 | T | T   | T   | Heterozygous CTC subset of CPP |
| chr3 | 146251336 | G | G   | G   | Heterozygous CTC subset of CPP |
| chr3 | 148714179 | A | A   | A   | Heterozygous CTC subset of CPP |
| chr3 | 148714181 | A | A   | A   | Heterozygous CTC subset of CPP |
| chr3 | 148727125 | C | C   | C   | Heterozygous CTC subset of CPP |
| chr3 | 149468530 | T | G,T | G   | Heterozygous CTC subset of CPP |
| chr3 | 149469212 | A | A   | A   | Heterozygous CTC subset of CPP |
| chr3 | 150127352 | T | T   | T   | Heterozygous CTC subset of CPP |
| chr3 | 150127776 | G | G   | G   | Heterozygous CTC subset of CPP |
| chr3 | 150285520 | T | C,T | T   | Heterozygous CTC subset of CPP |
| chr3 | 152150556 | C | C   | C   | Heterozygous CTC subset of CPP |
| chr3 | 152173354 | G | G   | G   | Heterozygous CTC subset of CPP |
| chr3 | 153994546 | T | T   | T   | Heterozygous CTC subset of CPP |
| chr3 | 154018887 | G | C,G | C,G | Heterozygous CTC subset of CPP |
| chr3 | 154032977 | A | A   | A   | Heterozygous CTC subset of CPP |
| chr3 | 156395785 | G | G   | G   | Heterozygous CTC subset of CPP |
| chr3 | 156422761 | G | G   | G   | Heterozygous CTC subset of CPP |
| chr3 | 156867317 | C | C   | C   | Heterozygous CTC subset of CPP |
| chr3 | 158317942 | A | A   | A   | Heterozygous CTC subset of CPP |

Grillet et al., Supplementary Table 5

|      |           |   |      |      |                                |
|------|-----------|---|------|------|--------------------------------|
| chr3 | 158363463 | A | A    | A    | Heterozygous CTC subset of CPP |
| chr3 | 160131347 | A | A,G  | A    | Heterozygous CTC subset of CPP |
| chr3 | 160131384 | T | T    | T    | Heterozygous CTC subset of CPP |
| chr3 | 160142807 | G | G    | G    | Heterozygous CTC subset of CPP |
| chr3 | 160143988 | G | -G,G | -G,G | Heterozygous CTC subset of CPP |
| chr3 | 160150303 | G | G    | G    | Heterozygous CTC subset of CPP |
| chr3 | 160151588 | A | A    | A    | Heterozygous CTC subset of CPP |
| chr3 | 160227606 | A | A,G  | A    | Heterozygous CTC subset of CPP |
| chr3 | 161147050 | A | A,C  | A,C  | Heterozygous CTC subset of CPP |
| chr3 | 167402098 | A | A    | A    | Heterozygous CTC subset of CPP |
| chr3 | 167402161 | C | C,T  | C    | Heterozygous CTC subset of CPP |
| chr3 | 167750479 | C | C,T  | C    | Heterozygous CTC subset of CPP |
| chr3 | 169700663 | G | G    | G    | Heterozygous CTC subset of CPP |
| chr3 | 169988286 | C | C,T  | C    | Heterozygous CTC subset of CPP |
| chr3 | 172480265 | A | A    | A    | Heterozygous CTC subset of CPP |
| chr3 | 172480266 | T | T    | T    | Heterozygous CTC subset of CPP |
| chr3 | 176744178 | T | T    | T    | Heterozygous CTC subset of CPP |
| chr3 | 176768329 | C | C    | C    | Heterozygous CTC subset of CPP |
| chr3 | 179051321 | A | A    | A    | Heterozygous CTC subset of CPP |
| chr3 | 179291169 | A | A    | A    | Heterozygous CTC subset of CPP |
| chr3 | 179298756 | T | T    | T    | Heterozygous CTC subset of CPP |
| chr3 | 179298999 | C | C,T  | C,T  | Heterozygous CTC subset of CPP |
| chr3 | 179301194 | T | C,T  | T    | Heterozygous CTC subset of CPP |
| chr3 | 180653015 | T | T    | T    | Heterozygous CTC subset of CPP |
| chr3 | 182681740 | C | C,T  | T    | Heterozygous CTC subset of CPP |
| chr3 | 183558402 | C | C,G  | C,G  | Heterozygous CTC subset of CPP |
| chr3 | 183861243 | A | A,G  | A    | Heterozygous CTC subset of CPP |
| chr3 | 183898034 | A | A,C  | A    | Heterozygous CTC subset of CPP |
| chr3 | 183898035 | G | A,G  | A,G  | Heterozygous CTC subset of CPP |
| chr3 | 183899832 | C | C,T  | C,T  | Heterozygous CTC subset of CPP |
| chr3 | 183906764 | A | A    | A    | Heterozygous CTC subset of CPP |
| chr3 | 183961711 | T | T    | T    | Heterozygous CTC subset of CPP |
| chr3 | 183975279 | T | T    | T    | Heterozygous CTC subset of CPP |
| chr3 | 184025286 | A | A    | A    | Heterozygous CTC subset of CPP |
| chr3 | 184026664 | A | A    | A    | Heterozygous CTC subset of CPP |
| chr3 | 184039666 | A | A,G  | G    | Heterozygous CTC subset of CPP |
| chr3 | 184046470 | C | C,T  | C,T  | Heterozygous CTC subset of CPP |
| chr3 | 184428903 | T | G,T  | G,T  | Heterozygous CTC subset of CPP |
| chr3 | 184429414 | C | A,C  | A,C  | Heterozygous CTC subset of CPP |
| chr3 | 185331165 | C | A,C  | A,C  | Heterozygous CTC subset of CPP |
| chr3 | 185542601 | A | A    | A    | Heterozygous CTC subset of CPP |
| chr3 | 185638900 | T | T    | T    | Heterozygous CTC subset of CPP |
| chr3 | 186301703 | A | A,G  | A    | Heterozygous CTC subset of CPP |
| chr3 | 186501387 | G | A,G  | G    | Heterozygous CTC subset of CPP |
| chr3 | 186509517 | G | A,G  | G    | Heterozygous CTC subset of CPP |
| chr3 | 186509637 | T | T    | T    | Heterozygous CTC subset of CPP |



Grillet et al., Supplementary Table 5

|      |           |   |     |     |                                |
|------|-----------|---|-----|-----|--------------------------------|
| chr3 | 191075902 | C | C,T | C   | Heterozygous CTC subset of CPP |
| chr3 | 191087804 | A | A   | A   | Heterozygous CTC subset of CPP |
| chr3 | 191100561 | C | A,C | A,C | Heterozygous CTC subset of CPP |
| chr3 | 193332807 | G | G   | G   | Heterozygous CTC subset of CPP |
| chr3 | 193334991 | G | A,G | A   | Heterozygous CTC subset of CPP |
| chr3 | 193374964 | T | C,T | C   | Heterozygous CTC subset of CPP |
| chr3 | 193376771 | T | T   | T   | Heterozygous CTC subset of CPP |
| chr3 | 193384960 | T | T   | T   | Heterozygous CTC subset of CPP |
| chr3 | 193855806 | T | T   | T   | Heterozygous CTC subset of CPP |
| chr3 | 193856023 | G | G   | G   | Heterozygous CTC subset of CPP |
| chr3 | 194362828 | C | C   | C   | Heterozygous CTC subset of CPP |
| chr3 | 194362948 | A | A   | A   | Heterozygous CTC subset of CPP |
| chr3 | 194365308 | G | G   | G   | Heterozygous CTC subset of CPP |
| chr3 | 194371656 | A | A   | A   | Heterozygous CTC subset of CPP |
| chr3 | 194373833 | G | A,G | G   | Heterozygous CTC subset of CPP |
| chr3 | 194387186 | C | C,T | C,T | Heterozygous CTC subset of CPP |
| chr3 | 195800811 | C | C,T | C,T | Heterozygous CTC subset of CPP |
| chr3 | 195802082 | A | A   | A   | Heterozygous CTC subset of CPP |
| chr3 | 195965631 | T | T   | T   | Heterozygous CTC subset of CPP |
| chr3 | 196555300 | C | C   | C   | Heterozygous CTC subset of CPP |
| chr3 | 196865197 | A | A   | A   | Heterozygous CTC subset of CPP |
| chr3 | 197495334 | G | A,G | A,G | Heterozygous CTC subset of CPP |
| chr3 | 197500337 | T | T   | T   | Heterozygous CTC subset of CPP |
| chr3 | 197500343 | A | A   | A   | Heterozygous CTC subset of CPP |
| chr4 | 755174    | C | C   | C   | Heterozygous CTC subset of CPP |
| chr4 | 843695    | A | A,G | A,G | Heterozygous CTC subset of CPP |
| chr4 | 853503    | G | G   | G   | Heterozygous CTC subset of CPP |
| chr4 | 860192    | A | A,G | A,G | Heterozygous CTC subset of CPP |
| chr4 | 860796    | C | C,T | C   | Heterozygous CTC subset of CPP |
| chr4 | 861022    | A | A   | A   | Heterozygous CTC subset of CPP |
| chr4 | 861220    | T | T   | T   | Heterozygous CTC subset of CPP |
| chr4 | 898449    | C | C   | C   | Heterozygous CTC subset of CPP |
| chr4 | 925864    | G | G   | G   | Heterozygous CTC subset of CPP |
| chr4 | 1018451   | A | A   | A   | Heterozygous CTC subset of CPP |
| chr4 | 1330759   | T | C,T | C,T | Heterozygous CTC subset of CPP |
| chr4 | 1713970   | G | G,T | G   | Heterozygous CTC subset of CPP |
| chr4 | 1729660   | C | C,T | C   | Heterozygous CTC subset of CPP |
| chr4 | 1729953   | G | A,G | G   | Heterozygous CTC subset of CPP |
| chr4 | 1729988   | G | A,G | G   | Heterozygous CTC subset of CPP |
| chr4 | 1730299   | A | A,G | A,G | Heterozygous CTC subset of CPP |
| chr4 | 1732978   | G | A,G | G   | Heterozygous CTC subset of CPP |
| chr4 | 1986542   | C | C,T | C   | Heterozygous CTC subset of CPP |
| chr4 | 2242389   | A | A   | A   | Heterozygous CTC subset of CPP |
| chr4 | 2498784   | T | T   | T   | Heterozygous CTC subset of CPP |
| chr4 | 2943361   | T | C,T | C,T | Heterozygous CTC subset of CPP |
| chr4 | 2951804   | A | A,G | A,G | Heterozygous CTC subset of CPP |

Grillet et al., Supplementary Table 5

|      |          |   |     |     |                                |
|------|----------|---|-----|-----|--------------------------------|
| chr4 | 3514695  | A | A,G | A,G | Heterozygous CTC subset of CPP |
| chr4 | 3516560  | G | A,G | G   | Heterozygous CTC subset of CPP |
| chr4 | 3519762  | A | A,G | A   | Heterozygous CTC subset of CPP |
| chr4 | 3526642  | T | C,T | T   | Heterozygous CTC subset of CPP |
| chr4 | 4249909  | C | C,T | T   | Heterozygous CTC subset of CPP |
| chr4 | 4281378  | T | T   | T   | Heterozygous CTC subset of CPP |
| chr4 | 4285349  | A | A   | A   | Heterozygous CTC subset of CPP |
| chr4 | 4543549  | T | T   | T   | Heterozygous CTC subset of CPP |
| chr4 | 6293059  | A | A   | A   | Heterozygous CTC subset of CPP |
| chr4 | 6302519  | G | A,G | A   | Heterozygous CTC subset of CPP |
| chr4 | 6675991  | A | A   | A   | Heterozygous CTC subset of CPP |
| chr4 | 6718372  | G | A,G | G   | Heterozygous CTC subset of CPP |
| chr4 | 6969034  | C | C   | C   | Heterozygous CTC subset of CPP |
| chr4 | 6969035  | T | T   | T   | Heterozygous CTC subset of CPP |
| chr4 | 17805259 | A | A   | A   | Heterozygous CTC subset of CPP |
| chr4 | 25823693 | G | G   | G   | Heterozygous CTC subset of CPP |
| chr4 | 25849007 | A | A   | A   | Heterozygous CTC subset of CPP |
| chr4 | 38016395 | T | G,T | T   | Heterozygous CTC subset of CPP |
| chr4 | 38696494 | T | T   | T   | Heterozygous CTC subset of CPP |
| chr4 | 39301755 | A | A   | A   | Heterozygous CTC subset of CPP |
| chr4 | 39301947 | G | G   | G   | Heterozygous CTC subset of CPP |
| chr4 | 39302029 | T | C,T | T   | Heterozygous CTC subset of CPP |
| chr4 | 39303925 | A | A,G | A,G | Heterozygous CTC subset of CPP |
| chr4 | 39304770 | A | A   | A   | Heterozygous CTC subset of CPP |
| chr4 | 39329221 | T | T   | T   | Heterozygous CTC subset of CPP |
| chr4 | 39460046 | A | A   | A   | Heterozygous CTC subset of CPP |
| chr4 | 39515752 | G | G   | G   | Heterozygous CTC subset of CPP |
| chr4 | 39827072 | T | T   | T   | Heterozygous CTC subset of CPP |
| chr4 | 39864606 | T | T   | T   | Heterozygous CTC subset of CPP |
| chr4 | 39864989 | T | T   | T   | Heterozygous CTC subset of CPP |
| chr4 | 39904017 | T | T   | T   | Heterozygous CTC subset of CPP |
| chr4 | 41992677 | C | C,G | G   | Heterozygous CTC subset of CPP |
| chr4 | 42003671 | A | A,G | G   | Heterozygous CTC subset of CPP |
| chr4 | 42020142 | A | A,G | G   | Heterozygous CTC subset of CPP |
| chr4 | 42022464 | C | A,C | A   | Heterozygous CTC subset of CPP |
| chr4 | 44688656 | T | T   | T   | Heterozygous CTC subset of CPP |
| chr4 | 44688660 | C | C   | C   | Heterozygous CTC subset of CPP |
| chr4 | 44692801 | A | A   | A   | Heterozygous CTC subset of CPP |
| chr4 | 48371984 | C | C   | C   | Heterozygous CTC subset of CPP |
| chr4 | 56262374 | A | A,G | A,G | Heterozygous CTC subset of CPP |
| chr4 | 57265501 | T | T   | T   | Heterozygous CTC subset of CPP |
| chr4 | 57267552 | A | A   | A   | Heterozygous CTC subset of CPP |
| chr4 | 57268330 | T | T   | T   | Heterozygous CTC subset of CPP |
| chr4 | 57273840 | C | C,G | C,G | Heterozygous CTC subset of CPP |
| chr4 | 57314974 | A | A   | A   | Heterozygous CTC subset of CPP |
| chr4 | 57316864 | T | T   | T   | Heterozygous CTC subset of CPP |

Grillet et al., Supplementary Table 5

|      |           |   |      |     |                                |
|------|-----------|---|------|-----|--------------------------------|
| chr4 | 57319772  | A | A,G  | A   | Heterozygous CTC subset of CPP |
| chr4 | 57319773  | T | T    | T   | Heterozygous CTC subset of CPP |
| chr4 | 57340351  | A | A    | A   | Heterozygous CTC subset of CPP |
| chr4 | 57797525  | A | A    | A   | Heterozygous CTC subset of CPP |
| chr4 | 57798155  | G | G    | G   | Heterozygous CTC subset of CPP |
| chr4 | 57839429  | T | T    | T   | Heterozygous CTC subset of CPP |
| chr4 | 57871884  | G | G    | G   | Heterozygous CTC subset of CPP |
| chr4 | 68529649  | T | T    | T   | Heterozygous CTC subset of CPP |
| chr4 | 68539424  | A | A    | A   | Heterozygous CTC subset of CPP |
| chr4 | 69203617  | T | +C,T | T   | Heterozygous CTC subset of CPP |
| chr4 | 71554601  | T | T    | T   | Heterozygous CTC subset of CPP |
| chr4 | 71555469  | T | T    | T   | Heterozygous CTC subset of CPP |
| chr4 | 73942678  | C | C,T  | C   | Heterozygous CTC subset of CPP |
| chr4 | 73942812  | A | A    | A   | Heterozygous CTC subset of CPP |
| chr4 | 73956600  | A | A    | A   | Heterozygous CTC subset of CPP |
| chr4 | 73956619  | A | A    | A   | Heterozygous CTC subset of CPP |
| chr4 | 73957869  | T | T    | T   | Heterozygous CTC subset of CPP |
| chr4 | 73962910  | G | A,G  | G   | Heterozygous CTC subset of CPP |
| chr4 | 73968215  | C | C    | C   | Heterozygous CTC subset of CPP |
| chr4 | 73979622  | T | T    | T   | Heterozygous CTC subset of CPP |
| chr4 | 73986758  | T | T    | T   | Heterozygous CTC subset of CPP |
| chr4 | 74043125  | A | A    | A   | Heterozygous CTC subset of CPP |
| chr4 | 76722353  | G | A,G  | A   | Heterozygous CTC subset of CPP |
| chr4 | 77052394  | A | A    | A   | Heterozygous CTC subset of CPP |
| chr4 | 77053872  | C | C    | C   | Heterozygous CTC subset of CPP |
| chr4 | 77871016  | T | G,T  | G   | Heterozygous CTC subset of CPP |
| chr4 | 77952123  | A | A    | A   | Heterozygous CTC subset of CPP |
| chr4 | 77996638  | T | T    | T   | Heterozygous CTC subset of CPP |
| chr4 | 78830434  | G | C,G  | G   | Heterozygous CTC subset of CPP |
| chr4 | 79503354  | T | T    | T   | Heterozygous CTC subset of CPP |
| chr4 | 83795806  | T | C,T  | C   | Heterozygous CTC subset of CPP |
| chr4 | 83978107  | A | A    | A   | Heterozygous CTC subset of CPP |
| chr4 | 84194649  | C | C    | C   | Heterozygous CTC subset of CPP |
| chr4 | 84382346  | A | A    | A   | Heterozygous CTC subset of CPP |
| chr4 | 88293887  | G | A,G  | A,G | Heterozygous CTC subset of CPP |
| chr4 | 88813180  | T | T    | T   | Heterozygous CTC subset of CPP |
| chr4 | 88815093  | A | A,G  | A,G | Heterozygous CTC subset of CPP |
| chr4 | 95170839  | G | A,G  | A,G | Heterozygous CTC subset of CPP |
| chr4 | 95202648  | A | A    | A   | Heterozygous CTC subset of CPP |
| chr4 | 95506842  | G | A,G  | G   | Heterozygous CTC subset of CPP |
| chr4 | 95585183  | C | C    | C   | Heterozygous CTC subset of CPP |
| chr4 | 99273722  | A | A    | A   | Heterozygous CTC subset of CPP |
| chr4 | 101947092 | A | A    | A   | Heterozygous CTC subset of CPP |
| chr4 | 103720567 | T | T    | T   | Heterozygous CTC subset of CPP |
| chr4 | 103723721 | A | A    | A   | Heterozygous CTC subset of CPP |
| chr4 | 103747650 | T | T    | T   | Heterozygous CTC subset of CPP |

Grillet et al., Supplementary Table 5

|      |           |   |      |      |                                |
|------|-----------|---|------|------|--------------------------------|
| chr4 | 103806560 | T | T    | T    | Heterozygous CTC subset of CPP |
| chr4 | 106395181 | G | A,G  | G    | Heterozygous CTC subset of CPP |
| chr4 | 108575989 | G | A,G  | A,G  | Heterozygous CTC subset of CPP |
| chr4 | 108622358 | A | A    | A    | Heterozygous CTC subset of CPP |
| chr4 | 108911051 | T | T    | T    | Heterozygous CTC subset of CPP |
| chr4 | 108944694 | T | T    | T    | Heterozygous CTC subset of CPP |
| chr4 | 110635562 | A | A    | A    | Heterozygous CTC subset of CPP |
| chr4 | 110737389 | T | C,T  | T    | Heterozygous CTC subset of CPP |
| chr4 | 111026709 | T | T    | T    | Heterozygous CTC subset of CPP |
| chr4 | 113187861 | A | A    | A    | Heterozygous CTC subset of CPP |
| chr4 | 113189392 | A | A    | A    | Heterozygous CTC subset of CPP |
| chr4 | 113578483 | A | A    | A    | Heterozygous CTC subset of CPP |
| chr4 | 120981378 | T | T    | T    | Heterozygous CTC subset of CPP |
| chr4 | 120982045 | T | C,T  | C,T  | Heterozygous CTC subset of CPP |
| chr4 | 122604631 | T | +C,T | +C,T | Heterozygous CTC subset of CPP |
| chr4 | 122725914 | G | G    | G    | Heterozygous CTC subset of CPP |
| chr4 | 129012184 | T | T    | T    | Heterozygous CTC subset of CPP |
| chr4 | 140270619 | A | A    | A    | Heterozygous CTC subset of CPP |
| chr4 | 140272420 | T | T    | T    | Heterozygous CTC subset of CPP |
| chr4 | 140272740 | G | G    | G    | Heterozygous CTC subset of CPP |
| chr4 | 142153681 | T | T    | T    | Heterozygous CTC subset of CPP |
| chr4 | 142153761 | A | A    | A    | Heterozygous CTC subset of CPP |
| chr4 | 142154912 | A | A    | A    | Heterozygous CTC subset of CPP |
| chr4 | 144442735 | C | C,T  | C    | Heterozygous CTC subset of CPP |
| chr4 | 144466696 | A | A    | A    | Heterozygous CTC subset of CPP |
| chr4 | 146041294 | T | T    | T    | Heterozygous CTC subset of CPP |
| chr4 | 146042535 | A | A    | A    | Heterozygous CTC subset of CPP |
| chr4 | 151604758 | T | T    | T    | Heterozygous CTC subset of CPP |
| chr4 | 152024222 | T | C,T  | C,T  | Heterozygous CTC subset of CPP |
| chr4 | 154191649 | T | T    | T    | Heterozygous CTC subset of CPP |
| chr4 | 154216710 | G | A,G  | A,G  | Heterozygous CTC subset of CPP |
| chr4 | 155457782 | T | T    | T    | Heterozygous CTC subset of CPP |
| chr4 | 155460288 | A | A    | A    | Heterozygous CTC subset of CPP |
| chr4 | 155461159 | T | T    | T    | Heterozygous CTC subset of CPP |
| chr4 | 155463430 | A | A    | A    | Heterozygous CTC subset of CPP |
| chr4 | 155465608 | T | T    | T    | Heterozygous CTC subset of CPP |
| chr4 | 164415930 | C | C,T  | C    | Heterozygous CTC subset of CPP |
| chr4 | 164435265 | A | A,C  | A,C  | Heterozygous CTC subset of CPP |
| chr4 | 164440574 | A | A    | A    | Heterozygous CTC subset of CPP |
| chr4 | 165118231 | G | A,G  | G    | Heterozygous CTC subset of CPP |
| chr4 | 166263047 | G | A,G  | G    | Heterozygous CTC subset of CPP |
| chr4 | 170557174 | C | C    | C    | Heterozygous CTC subset of CPP |
| chr4 | 170610329 | A | A    | A    | Heterozygous CTC subset of CPP |
| chr4 | 170618448 | C | C    | C    | Heterozygous CTC subset of CPP |
| chr4 | 174219443 | G | G    | G    | Heterozygous CTC subset of CPP |
| chr4 | 177248423 | T | T    | T    | Heterozygous CTC subset of CPP |

Grillet et al., Supplementary Table 5

|      |           |   |     |     |                                |
|------|-----------|---|-----|-----|--------------------------------|
| chr4 | 185634144 | T | T   | T   | Heterozygous CTC subset of CPP |
| chr4 | 185637699 | A | A,G | A   | Heterozygous CTC subset of CPP |
| chr4 | 185638297 | G | A,G | G   | Heterozygous CTC subset of CPP |
| chr4 | 185686032 | C | T   | T   | Heterozygous CTC subset of CPP |
| chr4 | 185687789 | A | A   | A   | Heterozygous CTC subset of CPP |
| chr4 | 185694999 | T | T   | T   | Heterozygous CTC subset of CPP |
| chr4 | 186083940 | T | T   | T   | Heterozygous CTC subset of CPP |
| chr4 | 186085246 | A | A   | A   | Heterozygous CTC subset of CPP |
| chr4 | 186096997 | T | C,T | T   | Heterozygous CTC subset of CPP |
| chr4 | 186097045 | C | C,T | T   | Heterozygous CTC subset of CPP |
| chr4 | 186111639 | T | C,T | T   | Heterozygous CTC subset of CPP |
| chr4 | 186112111 | G | A,G | G   | Heterozygous CTC subset of CPP |
| chr4 | 190862155 | T | T   | T   | Heterozygous CTC subset of CPP |
| chr4 | 190876196 | G | G   | G   | Heterozygous CTC subset of CPP |
| chr4 | 190876242 | G | A,G | A,G | Heterozygous CTC subset of CPP |
| chr5 | 205565    | G | A,G | G   | Heterozygous CTC subset of CPP |
| chr5 | 206024    | T | T   | T   | Heterozygous CTC subset of CPP |
| chr5 | 224633    | A | A,G | A   | Heterozygous CTC subset of CPP |
| chr5 | 226160    | A | A,C | A   | Heterozygous CTC subset of CPP |
| chr5 | 228362    | T | C,T | T   | Heterozygous CTC subset of CPP |
| chr5 | 231111    | T | C,T | C,T | Heterozygous CTC subset of CPP |
| chr5 | 233734    | C | C,G | C   | Heterozygous CTC subset of CPP |
| chr5 | 251469    | G | A,G | G   | Heterozygous CTC subset of CPP |
| chr5 | 251541    | A | A,G | A   | Heterozygous CTC subset of CPP |
| chr5 | 254599    | A | A,T | A   | Heterozygous CTC subset of CPP |
| chr5 | 256472    | G | A,G | G   | Heterozygous CTC subset of CPP |
| chr5 | 256509    | G | A,G | G   | Heterozygous CTC subset of CPP |
| chr5 | 311478    | T | C,T | C,T | Heterozygous CTC subset of CPP |
| chr5 | 447779    | C | A,C | C   | Heterozygous CTC subset of CPP |
| chr5 | 453567    | G | A,G | A   | Heterozygous CTC subset of CPP |
| chr5 | 865694    | T | T   | T   | Heterozygous CTC subset of CPP |
| chr5 | 886796    | A | A   | A   | Heterozygous CTC subset of CPP |
| chr5 | 889711    | T | T   | T   | Heterozygous CTC subset of CPP |
| chr5 | 1052360   | C | C,T | C   | Heterozygous CTC subset of CPP |
| chr5 | 1052390   | G | A,G | G   | Heterozygous CTC subset of CPP |
| chr5 | 1057615   | A | G   | G   | Heterozygous CTC subset of CPP |
| chr5 | 1063998   | G | A,G | A   | Heterozygous CTC subset of CPP |
| chr5 | 1065399   | C | C,T | C   | Heterozygous CTC subset of CPP |
| chr5 | 1081702   | A | A,G | A,G | Heterozygous CTC subset of CPP |
| chr5 | 1081745   | T | T   | T   | Heterozygous CTC subset of CPP |
| chr5 | 1081767   | C | C,T | C,T | Heterozygous CTC subset of CPP |
| chr5 | 1466919   | G | A,G | G   | Heterozygous CTC subset of CPP |
| chr5 | 1467004   | A | A,G | A   | Heterozygous CTC subset of CPP |
| chr5 | 1494909   | C | C,T | C,T | Heterozygous CTC subset of CPP |
| chr5 | 1798824   | A | A   | A   | Heterozygous CTC subset of CPP |
| chr5 | 1799001   | T | T   | T   | Heterozygous CTC subset of CPP |

Grillet et al., Supplementary Table 5

|      |          |   |     |     |                                |
|------|----------|---|-----|-----|--------------------------------|
| chr5 | 5462148  | G | A,G | A   | Heterozygous CTC subset of CPP |
| chr5 | 6600064  | G | G,T | G   | Heterozygous CTC subset of CPP |
| chr5 | 6604787  | C | C,T | C,T | Heterozygous CTC subset of CPP |
| chr5 | 6748659  | T | C,T | C   | Heterozygous CTC subset of CPP |
| chr5 | 7878179  | C | C,T | C   | Heterozygous CTC subset of CPP |
| chr5 | 7878192  | T | C,T | C,T | Heterozygous CTC subset of CPP |
| chr5 | 7897191  | C | C,T | C,T | Heterozygous CTC subset of CPP |
| chr5 | 7897283  | G | A,G | A,G | Heterozygous CTC subset of CPP |
| chr5 | 7897319  | G | A,G | G   | Heterozygous CTC subset of CPP |
| chr5 | 10239261 | G | A,G | G   | Heterozygous CTC subset of CPP |
| chr5 | 10258341 | G | A,G | G   | Heterozygous CTC subset of CPP |
| chr5 | 10381995 | T | T   | T   | Heterozygous CTC subset of CPP |
| chr5 | 16673975 | C | C,G | G   | Heterozygous CTC subset of CPP |
| chr5 | 16674993 | T | T   | T   | Heterozygous CTC subset of CPP |
| chr5 | 16682025 | A | A   | A   | Heterozygous CTC subset of CPP |
| chr5 | 16689994 | T | T   | T   | Heterozygous CTC subset of CPP |
| chr5 | 16701113 | A | A   | A   | Heterozygous CTC subset of CPP |
| chr5 | 16769264 | A | A   | A   | Heterozygous CTC subset of CPP |
| chr5 | 16769273 | G | A,G | A   | Heterozygous CTC subset of CPP |
| chr5 | 16794897 | T | T   | T   | Heterozygous CTC subset of CPP |
| chr5 | 31422911 | T | T   | T   | Heterozygous CTC subset of CPP |
| chr5 | 31451719 | T | T   | T   | Heterozygous CTC subset of CPP |
| chr5 | 32126655 | A | A,G | A   | Heterozygous CTC subset of CPP |
| chr5 | 32174056 | C | C,G | C   | Heterozygous CTC subset of CPP |
| chr5 | 32400266 | A | A,G | G   | Heterozygous CTC subset of CPP |
| chr5 | 32444806 | T | T   | T   | Heterozygous CTC subset of CPP |
| chr5 | 32599168 | A | A   | A   | Heterozygous CTC subset of CPP |
| chr5 | 33461355 | G | A,G | A,G | Heterozygous CTC subset of CPP |
| chr5 | 34807928 | C | C,T | C,T | Heterozygous CTC subset of CPP |
| chr5 | 34954686 | A | A   | A   | Heterozygous CTC subset of CPP |
| chr5 | 37294473 | T | C,T | T   | Heterozygous CTC subset of CPP |
| chr5 | 37318097 | C | C   | C   | Heterozygous CTC subset of CPP |
| chr5 | 37324127 | G | G   | G   | Heterozygous CTC subset of CPP |
| chr5 | 37358227 | A | A   | A   | Heterozygous CTC subset of CPP |
| chr5 | 37358232 | A | A   | A   | Heterozygous CTC subset of CPP |
| chr5 | 37371059 | G | A,G | G   | Heterozygous CTC subset of CPP |
| chr5 | 37605203 | C | C   | C   | Heterozygous CTC subset of CPP |
| chr5 | 37605238 | C | C   | C   | Heterozygous CTC subset of CPP |
| chr5 | 37697796 | G | G   | G   | Heterozygous CTC subset of CPP |
| chr5 | 40832648 | A | A   | A   | Heterozygous CTC subset of CPP |
| chr5 | 40832673 | T | C,T | C,T | Heterozygous CTC subset of CPP |
| chr5 | 43175103 | C | C,T | C   | Heterozygous CTC subset of CPP |
| chr5 | 43294192 | C | C,T | C   | Heterozygous CTC subset of CPP |
| chr5 | 43297144 | A | A,G | A   | Heterozygous CTC subset of CPP |
| chr5 | 52096889 | C | A,C | A   | Heterozygous CTC subset of CPP |
| chr5 | 52096914 | A | A   | A   | Heterozygous CTC subset of CPP |

Grillet et al., Supplementary Table 5

|      |          |   |     |     |                                |
|------|----------|---|-----|-----|--------------------------------|
| chr5 | 52096940 | T | T   | T   | Heterozygous CTC subset of CPP |
| chr5 | 52396257 | A | A   | A   | Heterozygous CTC subset of CPP |
| chr5 | 52397307 | C | C   | C   | Heterozygous CTC subset of CPP |
| chr5 | 52397314 | C | C   | C   | Heterozygous CTC subset of CPP |
| chr5 | 52856504 | G | C,G | C,G | Heterozygous CTC subset of CPP |
| chr5 | 54696189 | T | T   | T   | Heterozygous CTC subset of CPP |
| chr5 | 55251898 | T | T   | T   | Heterozygous CTC subset of CPP |
| chr5 | 59982869 | T | T   | T   | Heterozygous CTC subset of CPP |
| chr5 | 60448704 | A | A   | A   | Heterozygous CTC subset of CPP |
| chr5 | 61654056 | T | T   | T   | Heterozygous CTC subset of CPP |
| chr5 | 61659027 | A | A   | A   | Heterozygous CTC subset of CPP |
| chr5 | 61669613 | T | T   | T   | Heterozygous CTC subset of CPP |
| chr5 | 61677050 | C | C   | C   | Heterozygous CTC subset of CPP |
| chr5 | 61887472 | A | A   | A   | Heterozygous CTC subset of CPP |
| chr5 | 64097145 | C | C,G | C   | Heterozygous CTC subset of CPP |
| chr5 | 64314130 | G | G   | G   | Heterozygous CTC subset of CPP |
| chr5 | 64850694 | A | A   | A   | Heterozygous CTC subset of CPP |
| chr5 | 64859204 | G | G   | G   | Heterozygous CTC subset of CPP |
| chr5 | 64867847 | T | T   | T   | Heterozygous CTC subset of CPP |
| chr5 | 64867901 | C | C   | C   | Heterozygous CTC subset of CPP |
| chr5 | 64881936 | A | A,G | A,G | Heterozygous CTC subset of CPP |
| chr5 | 65018126 | C | C,G | C   | Heterozygous CTC subset of CPP |
| chr5 | 65054653 | G | G   | G   | Heterozygous CTC subset of CPP |
| chr5 | 65058862 | A | A   | A   | Heterozygous CTC subset of CPP |
| chr5 | 65108215 | A | A,G | A,G | Heterozygous CTC subset of CPP |
| chr5 | 68398951 | A | A   | A   | Heterozygous CTC subset of CPP |
| chr5 | 68419054 | A | A,T | A,T | Heterozygous CTC subset of CPP |
| chr5 | 68425387 | T | T   | T   | Heterozygous CTC subset of CPP |
| chr5 | 68471247 | G | A,G | G   | Heterozygous CTC subset of CPP |
| chr5 | 68531253 | C | C,T | T   | Heterozygous CTC subset of CPP |
| chr5 | 71519664 | C | C,T | C   | Heterozygous CTC subset of CPP |
| chr5 | 71524163 | A | A,T | A   | Heterozygous CTC subset of CPP |
| chr5 | 71524194 | C | C   | C   | Heterozygous CTC subset of CPP |
| chr5 | 72183022 | A | A   | A   | Heterozygous CTC subset of CPP |
| chr5 | 72184098 | C | C,T | T   | Heterozygous CTC subset of CPP |
| chr5 | 72185762 | T | T   | T   | Heterozygous CTC subset of CPP |
| chr5 | 72196836 | A | A   | A   | Heterozygous CTC subset of CPP |
| chr5 | 72204774 | A | A   | A   | Heterozygous CTC subset of CPP |
| chr5 | 72864426 | C | C   | C   | Heterozygous CTC subset of CPP |
| chr5 | 73931246 | T | C,T | C   | Heterozygous CTC subset of CPP |
| chr5 | 73985188 | A | A   | A   | Heterozygous CTC subset of CPP |
| chr5 | 74026142 | G | G   | G   | Heterozygous CTC subset of CPP |
| chr5 | 74026207 | A | A   | A   | Heterozygous CTC subset of CPP |
| chr5 | 74037359 | C | C   | C   | Heterozygous CTC subset of CPP |
| chr5 | 74037386 | T | A,T | T   | Heterozygous CTC subset of CPP |
| chr5 | 74063154 | C | C,G | C   | Heterozygous CTC subset of CPP |

Grillet et al., Supplementary Table 5

|      |           |   |     |   |                                |
|------|-----------|---|-----|---|--------------------------------|
| chr5 | 74065132  | A | A   | A | Heterozygous CTC subset of CPP |
| chr5 | 74069863  | A | A,G | A | Heterozygous CTC subset of CPP |
| chr5 | 74069873  | A | A   | A | Heterozygous CTC subset of CPP |
| chr5 | 74652272  | A | A   | A | Heterozygous CTC subset of CPP |
| chr5 | 75469788  | T | T   | T | Heterozygous CTC subset of CPP |
| chr5 | 76330259  | A | A   | A | Heterozygous CTC subset of CPP |
| chr5 | 77406161  | T | T   | T | Heterozygous CTC subset of CPP |
| chr5 | 77412011  | A | A,G | A | Heterozygous CTC subset of CPP |
| chr5 | 77473165  | A | A,G | A | Heterozygous CTC subset of CPP |
| chr5 | 77473229  | T | T   | T | Heterozygous CTC subset of CPP |
| chr5 | 77563388  | T | T   | T | Heterozygous CTC subset of CPP |
| chr5 | 77684726  | G | A,G | G | Heterozygous CTC subset of CPP |
| chr5 | 79950554  | G | G   | G | Heterozygous CTC subset of CPP |
| chr5 | 79950736  | C | C   | C | Heterozygous CTC subset of CPP |
| chr5 | 80600765  | G | G   | G | Heterozygous CTC subset of CPP |
| chr5 | 80600940  | G | G   | G | Heterozygous CTC subset of CPP |
| chr5 | 81573670  | G | A,G | G | Heterozygous CTC subset of CPP |
| chr5 | 86564722  | A | A   | A | Heterozygous CTC subset of CPP |
| chr5 | 89701536  | T | T   | T | Heterozygous CTC subset of CPP |
| chr5 | 89703624  | C | C   | C | Heterozygous CTC subset of CPP |
| chr5 | 94800283  | T | T   | T | Heterozygous CTC subset of CPP |
| chr5 | 94856456  | A | A   | A | Heterozygous CTC subset of CPP |
| chr5 | 94858974  | T | T   | T | Heterozygous CTC subset of CPP |
| chr5 | 95129745  | A | A   | A | Heterozygous CTC subset of CPP |
| chr5 | 96031569  | A | A,G | A | Heterozygous CTC subset of CPP |
| chr5 | 96031611  | G | G   | G | Heterozygous CTC subset of CPP |
| chr5 | 96086334  | G | C,G | G | Heterozygous CTC subset of CPP |
| chr5 | 96503639  | T | T   | T | Heterozygous CTC subset of CPP |
| chr5 | 96513471  | G | C,G | G | Heterozygous CTC subset of CPP |
| chr5 | 98193945  | A | A   | A | Heterozygous CTC subset of CPP |
| chr5 | 98207859  | A | A   | A | Heterozygous CTC subset of CPP |
| chr5 | 98216819  | A | A   | A | Heterozygous CTC subset of CPP |
| chr5 | 98217798  | T | T   | T | Heterozygous CTC subset of CPP |
| chr5 | 102295723 | C | C,T | C | Heterozygous CTC subset of CPP |
| chr5 | 102296869 | A | A   | A | Heterozygous CTC subset of CPP |
| chr5 | 102310063 | G | G   | G | Heterozygous CTC subset of CPP |
| chr5 | 108672946 | C | C   | C | Heterozygous CTC subset of CPP |
| chr5 | 108673043 | A | A   | A | Heterozygous CTC subset of CPP |
| chr5 | 108713970 | C | T   | T | Heterozygous CTC subset of CPP |
| chr5 | 108713982 | T | C,T | T | Heterozygous CTC subset of CPP |
| chr5 | 108714585 | T | T   | T | Heterozygous CTC subset of CPP |
| chr5 | 108719151 | G | A,G | G | Heterozygous CTC subset of CPP |
| chr5 | 109183384 | A | A   | A | Heterozygous CTC subset of CPP |
| chr5 | 110074989 | T | T   | T | Heterozygous CTC subset of CPP |
| chr5 | 110842048 | T | T   | T | Heterozygous CTC subset of CPP |
| chr5 | 114606964 | T | T   | T | Heterozygous CTC subset of CPP |



Grillet et al., Supplementary Table 5

|      |           |   |      |      |                                |
|------|-----------|---|------|------|--------------------------------|
| chr5 | 118811533 | G | A,G  | A,G  | Heterozygous CTC subset of CPP |
| chr5 | 118861713 | A | A,G  | A,G  | Heterozygous CTC subset of CPP |
| chr5 | 122137589 | T | G,T  | T    | Heterozygous CTC subset of CPP |
| chr5 | 122359640 | T | C,T  | C,T  | Heterozygous CTC subset of CPP |
| chr5 | 122361514 | T | T    | T    | Heterozygous CTC subset of CPP |
| chr5 | 122926140 | T | T    | T    | Heterozygous CTC subset of CPP |
| chr5 | 125890003 | A | A    | A    | Heterozygous CTC subset of CPP |
| chr5 | 125904013 | A | A    | A    | Heterozygous CTC subset of CPP |
| chr5 | 125939583 | G | G    | G    | Heterozygous CTC subset of CPP |
| chr5 | 125939711 | C | C    | C    | Heterozygous CTC subset of CPP |
| chr5 | 126887461 | T | T    | T    | Heterozygous CTC subset of CPP |
| chr5 | 126887569 | G | A,G  | A    | Heterozygous CTC subset of CPP |
| chr5 | 127419955 | A | A    | A    | Heterozygous CTC subset of CPP |
| chr5 | 127448537 | A | A    | A    | Heterozygous CTC subset of CPP |
| chr5 | 131544952 | G | G    | G    | Heterozygous CTC subset of CPP |
| chr5 | 131911545 | A | A    | A    | Heterozygous CTC subset of CPP |
| chr5 | 131931451 | T | T    | T    | Heterozygous CTC subset of CPP |
| chr5 | 131944312 | T | T    | T    | Heterozygous CTC subset of CPP |
| chr5 | 131973838 | A | A    | A    | Heterozygous CTC subset of CPP |
| chr5 | 132099494 | A | A    | A    | Heterozygous CTC subset of CPP |
| chr5 | 132099511 | A | A    | A    | Heterozygous CTC subset of CPP |
| chr5 | 132100104 | G | A,G  | G    | Heterozygous CTC subset of CPP |
| chr5 | 132232626 | G | G    | G    | Heterozygous CTC subset of CPP |
| chr5 | 132272838 | T | T    | T    | Heterozygous CTC subset of CPP |
| chr5 | 133295258 | T | T    | T    | Heterozygous CTC subset of CPP |
| chr5 | 133496677 | C | C    | C    | Heterozygous CTC subset of CPP |
| chr5 | 133496678 | C | C    | C    | Heterozygous CTC subset of CPP |
| chr5 | 133942601 | A | A    | A    | Heterozygous CTC subset of CPP |
| chr5 | 134076812 | G | A,G  | G    | Heterozygous CTC subset of CPP |
| chr5 | 134076902 | A | A    | A    | Heterozygous CTC subset of CPP |
| chr5 | 134121186 | T | T    | T    | Heterozygous CTC subset of CPP |
| chr5 | 134223795 | T | T    | T    | Heterozygous CTC subset of CPP |
| chr5 | 134670741 | C | C,T  | C    | Heterozygous CTC subset of CPP |
| chr5 | 134670765 | A | A,G  | A    | Heterozygous CTC subset of CPP |
| chr5 | 135390520 | C | C    | C    | Heterozygous CTC subset of CPP |
| chr5 | 135391417 | A | A    | A    | Heterozygous CTC subset of CPP |
| chr5 | 135513085 | T | +C,T | +C,T | Heterozygous CTC subset of CPP |
| chr5 | 135513086 | A | A    | A    | Heterozygous CTC subset of CPP |
| chr5 | 137088945 | C | C,T  | C    | Heterozygous CTC subset of CPP |
| chr5 | 137500665 | G | A,G  | G    | Heterozygous CTC subset of CPP |
| chr5 | 137722163 | A | A    | A    | Heterozygous CTC subset of CPP |
| chr5 | 137754808 | G | A,G  | G    | Heterozygous CTC subset of CPP |
| chr5 | 137759901 | G | G    | G    | Heterozygous CTC subset of CPP |
| chr5 | 137762687 | C | A,C  | C    | Heterozygous CTC subset of CPP |
| chr5 | 137766066 | G | A,G  | G    | Heterozygous CTC subset of CPP |
| chr5 | 137803360 | A | A    | A    | Heterozygous CTC subset of CPP |

Grillet et al., Supplementary Table 5

|      |           |   |      |      |                                |
|------|-----------|---|------|------|--------------------------------|
| chr5 | 137892170 | G | A,G  | G    | Heterozygous CTC subset of CPP |
| chr5 | 137893185 | A | +T,A | +T,A | Heterozygous CTC subset of CPP |
| chr5 | 137893186 | C | C    | C    | Heterozygous CTC subset of CPP |
| chr5 | 137893187 | T | T    | T    | Heterozygous CTC subset of CPP |
| chr5 | 137893560 | T | T    | T    | Heterozygous CTC subset of CPP |
| chr5 | 138266552 | C | C,G  | C    | Heterozygous CTC subset of CPP |
| chr5 | 138643062 | T | A,T  | A,T  | Heterozygous CTC subset of CPP |
| chr5 | 138654705 | A | A    | A    | Heterozygous CTC subset of CPP |
| chr5 | 138661339 | A | A,G  | A    | Heterozygous CTC subset of CPP |
| chr5 | 138665756 | G | A,G  | A,G  | Heterozygous CTC subset of CPP |
| chr5 | 138994551 | G | G    | G    | Heterozygous CTC subset of CPP |
| chr5 | 139060486 | G | A,G  | G    | Heterozygous CTC subset of CPP |
| chr5 | 139865296 | A | A    | A    | Heterozygous CTC subset of CPP |
| chr5 | 139889734 | A | A    | A    | Heterozygous CTC subset of CPP |
| chr5 | 139893034 | T | T    | T    | Heterozygous CTC subset of CPP |
| chr5 | 139893064 | G | G    | G    | Heterozygous CTC subset of CPP |
| chr5 | 139905706 | A | A    | A    | Heterozygous CTC subset of CPP |
| chr5 | 139908444 | T | T    | T    | Heterozygous CTC subset of CPP |
| chr5 | 139909224 | T | T    | T    | Heterozygous CTC subset of CPP |
| chr5 | 140049101 | C | C    | C    | Heterozygous CTC subset of CPP |
| chr5 | 140073247 | A | A    | A    | Heterozygous CTC subset of CPP |
| chr5 | 140076630 | T | T    | T    | Heterozygous CTC subset of CPP |
| chr5 | 140957063 | A | A    | A    | Heterozygous CTC subset of CPP |
| chr5 | 140961941 | T | +C,T | +C,T | Heterozygous CTC subset of CPP |
| chr5 | 141007754 | C | C    | C    | Heterozygous CTC subset of CPP |
| chr5 | 141305015 | T | T    | T    | Heterozygous CTC subset of CPP |
| chr5 | 141312946 | A | A    | A    | Heterozygous CTC subset of CPP |
| chr5 | 143541871 | A | A    | A    | Heterozygous CTC subset of CPP |
| chr5 | 145610294 | C | C,G  | C    | Heterozygous CTC subset of CPP |
| chr5 | 145838517 | A | A    | A    | Heterozygous CTC subset of CPP |
| chr5 | 145849239 | A | A    | A    | Heterozygous CTC subset of CPP |
| chr5 | 148729265 | A | A    | A    | Heterozygous CTC subset of CPP |
| chr5 | 148899865 | A | A    | A    | Heterozygous CTC subset of CPP |
| chr5 | 148904614 | A | A    | A    | Heterozygous CTC subset of CPP |
| chr5 | 149421502 | A | A,G  | A    | Heterozygous CTC subset of CPP |
| chr5 | 149427300 | T | T    | T    | Heterozygous CTC subset of CPP |
| chr5 | 149430024 | G | G    | G    | Heterozygous CTC subset of CPP |
| chr5 | 149754991 | C | C,T  | C    | Heterozygous CTC subset of CPP |
| chr5 | 149755340 | G | G,T  | G    | Heterozygous CTC subset of CPP |
| chr5 | 149755421 | A | A,G  | A    | Heterozygous CTC subset of CPP |
| chr5 | 149759096 | T | C,T  | T    | Heterozygous CTC subset of CPP |
| chr5 | 149777931 | G | +A,G | G    | Heterozygous CTC subset of CPP |
| chr5 | 149823836 | T | C,T  | C,T  | Heterozygous CTC subset of CPP |
| chr5 | 149826526 | C | C,T  | C    | Heterozygous CTC subset of CPP |
| chr5 | 150075236 | A | A    | A    | Heterozygous CTC subset of CPP |
| chr5 | 150409619 | A | A    | A    | Heterozygous CTC subset of CPP |

Grillet et al., Supplementary Table 5

|      |           |   |     |     |                                |
|------|-----------|---|-----|-----|--------------------------------|
| chr5 | 150410219 | C | A,C | A,C | Heterozygous CTC subset of CPP |
| chr5 | 154181624 | C | C,G | C   | Heterozygous CTC subset of CPP |
| chr5 | 154193651 | A | A   | A   | Heterozygous CTC subset of CPP |
| chr5 | 154320823 | G | G   | G   | Heterozygous CTC subset of CPP |
| chr5 | 154346259 | A | A,G | A   | Heterozygous CTC subset of CPP |
| chr5 | 154346296 | G | A,G | G   | Heterozygous CTC subset of CPP |
| chr5 | 158630629 | G | G   | G   | Heterozygous CTC subset of CPP |
| chr5 | 158630630 | T | T   | T   | Heterozygous CTC subset of CPP |
| chr5 | 159520661 | T | C,T | T   | Heterozygous CTC subset of CPP |
| chr5 | 159830349 | T | T   | T   | Heterozygous CTC subset of CPP |
| chr5 | 159832080 | G | G   | G   | Heterozygous CTC subset of CPP |
| chr5 | 159833631 | A | A   | A   | Heterozygous CTC subset of CPP |
| chr5 | 159835658 | A | A,G | G   | Heterozygous CTC subset of CPP |
| chr5 | 159849895 | A | A   | A   | Heterozygous CTC subset of CPP |
| chr5 | 162910142 | A | A   | A   | Heterozygous CTC subset of CPP |
| chr5 | 162917421 | T | T   | T   | Heterozygous CTC subset of CPP |
| chr5 | 162917425 | T | T   | T   | Heterozygous CTC subset of CPP |
| chr5 | 162940999 | A | A,G | A,G | Heterozygous CTC subset of CPP |
| chr5 | 167835572 | T | T   | T   | Heterozygous CTC subset of CPP |
| chr5 | 167868779 | A | A   | A   | Heterozygous CTC subset of CPP |
| chr5 | 167868809 | C | C   | C   | Heterozygous CTC subset of CPP |
| chr5 | 167891830 | T | C,T | C,T | Heterozygous CTC subset of CPP |
| chr5 | 167913510 | G | A,G | A,G | Heterozygous CTC subset of CPP |
| chr5 | 167919726 | A | A,G | A   | Heterozygous CTC subset of CPP |
| chr5 | 167919825 | G | A,G | G   | Heterozygous CTC subset of CPP |
| chr5 | 167924260 | C | A,C | C   | Heterozygous CTC subset of CPP |
| chr5 | 167933060 | A | A,G | A   | Heterozygous CTC subset of CPP |
| chr5 | 167933158 | T | A,T | T   | Heterozygous CTC subset of CPP |
| chr5 | 167943827 | G | A,G | A,G | Heterozygous CTC subset of CPP |
| chr5 | 169028345 | C | C   | C   | Heterozygous CTC subset of CPP |
| chr5 | 170815008 | T | T   | T   | Heterozygous CTC subset of CPP |
| chr5 | 170817118 | A | A   | A   | Heterozygous CTC subset of CPP |
| chr5 | 171638949 | G | G   | G   | Heterozygous CTC subset of CPP |
| chr5 | 175811095 | G | G   | G   | Heterozygous CTC subset of CPP |
| chr5 | 175811103 | A | A,G | A   | Heterozygous CTC subset of CPP |
| chr5 | 175811104 | A | A,T | A   | Heterozygous CTC subset of CPP |
| chr5 | 175811133 | T | C,T | T   | Heterozygous CTC subset of CPP |
| chr5 | 175811233 | C | C,T | C   | Heterozygous CTC subset of CPP |
| chr5 | 175815874 | T | C,T | T   | Heterozygous CTC subset of CPP |
| chr5 | 175957136 | C | C   | C   | Heterozygous CTC subset of CPP |
| chr5 | 176081933 | A | A   | A   | Heterozygous CTC subset of CPP |
| chr5 | 176382995 | G | A,G | G   | Heterozygous CTC subset of CPP |
| chr5 | 176395677 | T | T   | T   | Heterozygous CTC subset of CPP |
| chr5 | 176517809 | A | A   | A   | Heterozygous CTC subset of CPP |
| chr5 | 176519658 | C | C   | C   | Heterozygous CTC subset of CPP |
| chr5 | 176638528 | T | T   | T   | Heterozygous CTC subset of CPP |

Grillet et al., Supplementary Table 5

|      |           |   |      |      |                                |
|------|-----------|---|------|------|--------------------------------|
| chr5 | 176721119 | G | G    | G    | Heterozygous CTC subset of CPP |
| chr5 | 176721134 | T | T    | T    | Heterozygous CTC subset of CPP |
| chr5 | 176728770 | A | A    | A    | Heterozygous CTC subset of CPP |
| chr5 | 176732948 | T | T    | T    | Heterozygous CTC subset of CPP |
| chr5 | 176778283 | G | G    | G    | Heterozygous CTC subset of CPP |
| chr5 | 176863519 | G | C,G  | C,G  | Heterozygous CTC subset of CPP |
| chr5 | 176868002 | A | A    | A    | Heterozygous CTC subset of CPP |
| chr5 | 176885499 | T | C,T  | C,T  | Heterozygous CTC subset of CPP |
| chr5 | 176894756 | C | C,T  | C,T  | Heterozygous CTC subset of CPP |
| chr5 | 176940384 | G | A,G  | G    | Heterozygous CTC subset of CPP |
| chr5 | 177482992 | A | A    | A    | Heterozygous CTC subset of CPP |
| chr5 | 177482993 | A | A    | A    | Heterozygous CTC subset of CPP |
| chr5 | 177483111 | A | A    | A    | Heterozygous CTC subset of CPP |
| chr5 | 177570693 | A | A    | A    | Heterozygous CTC subset of CPP |
| chr5 | 177577897 | A | A    | A    | Heterozygous CTC subset of CPP |
| chr5 | 177631783 | G | A,G  | A,G  | Heterozygous CTC subset of CPP |
| chr5 | 177634226 | G | +T,G | +T,G | Heterozygous CTC subset of CPP |
| chr5 | 178996346 | A | A    | A    | Heterozygous CTC subset of CPP |
| chr5 | 179034587 | A | A    | A    | Heterozygous CTC subset of CPP |
| chr5 | 179036433 | G | A,G  | G    | Heterozygous CTC subset of CPP |
| chr5 | 179044988 | A | A    | A    | Heterozygous CTC subset of CPP |
| chr5 | 179044989 | C | C    | C    | Heterozygous CTC subset of CPP |
| chr5 | 179047891 | A | A    | A    | Heterozygous CTC subset of CPP |
| chr5 | 179126090 | C | C,T  | T    | Heterozygous CTC subset of CPP |
| chr5 | 179133256 | C | +A,C | +A,C | Heterozygous CTC subset of CPP |
| chr5 | 179201322 | T | T    | T    | Heterozygous CTC subset of CPP |
| chr5 | 179260153 | C | C,T  | C,T  | Heterozygous CTC subset of CPP |
| chr5 | 179260213 | G | A,G  | A,G  | Heterozygous CTC subset of CPP |
| chr5 | 179956348 | A | A    | A    | Heterozygous CTC subset of CPP |
| chr5 | 179994113 | G | G    | G    | Heterozygous CTC subset of CPP |
| chr5 | 180219507 | G | A,G  | G    | Heterozygous CTC subset of CPP |
| chr5 | 180219563 | T | T    | T    | Heterozygous CTC subset of CPP |
| chr5 | 180219626 | T | T    | T    | Heterozygous CTC subset of CPP |
| chr6 | 1312998   | T | C,T  | T    | Heterozygous CTC subset of CPP |
| chr6 | 1313980   | C | C,G  | G    | Heterozygous CTC subset of CPP |
| chr6 | 1314141   | T | T    | T    | Heterozygous CTC subset of CPP |
| chr6 | 1742794   | A | A,G  | G    | Heterozygous CTC subset of CPP |
| chr6 | 2245572   | T | T    | T    | Heterozygous CTC subset of CPP |
| chr6 | 2766144   | T | C,T  | T    | Heterozygous CTC subset of CPP |
| chr6 | 2766465   | T | C,T  | T    | Heterozygous CTC subset of CPP |
| chr6 | 2784571   | G | A,G  | G    | Heterozygous CTC subset of CPP |
| chr6 | 2948773   | A | A    | A    | Heterozygous CTC subset of CPP |
| chr6 | 2955802   | T | C,T  | C    | Heterozygous CTC subset of CPP |
| chr6 | 3010390   | C | C,T  | T    | Heterozygous CTC subset of CPP |
| chr6 | 4032363   | T | T    | T    | Heterozygous CTC subset of CPP |
| chr6 | 4052313   | T | T    | T    | Heterozygous CTC subset of CPP |

Grillet et al., Supplementary Table 5

|      |          |   |     |     |                                |
|------|----------|---|-----|-----|--------------------------------|
| chr6 | 4057358  | T | T   | T   | Heterozygous CTC subset of CPP |
| chr6 | 4892368  | T | T   | T   | Heterozygous CTC subset of CPP |
| chr6 | 5260936  | A | A,C | A   | Heterozygous CTC subset of CPP |
| chr6 | 7247344  | C | A,C | C   | Heterozygous CTC subset of CPP |
| chr6 | 7310259  | A | A,G | A   | Heterozygous CTC subset of CPP |
| chr6 | 7393452  | C | C   | C   | Heterozygous CTC subset of CPP |
| chr6 | 7403080  | T | T   | T   | Heterozygous CTC subset of CPP |
| chr6 | 7417569  | A | A,C | A   | Heterozygous CTC subset of CPP |
| chr6 | 7417669  | A | A   | A   | Heterozygous CTC subset of CPP |
| chr6 | 7572262  | A | A,G | G   | Heterozygous CTC subset of CPP |
| chr6 | 7576527  | G | A,G | A   | Heterozygous CTC subset of CPP |
| chr6 | 7577260  | C | C,T | C   | Heterozygous CTC subset of CPP |
| chr6 | 7581636  | G | A,G | G   | Heterozygous CTC subset of CPP |
| chr6 | 7584617  | C | C,T | C,T | Heterozygous CTC subset of CPP |
| chr6 | 7585631  | A | A   | A   | Heterozygous CTC subset of CPP |
| chr6 | 7585966  | G | G   | G   | Heterozygous CTC subset of CPP |
| chr6 | 7585967  | G | C,G | C   | Heterozygous CTC subset of CPP |
| chr6 | 7910891  | T | T   | T   | Heterozygous CTC subset of CPP |
| chr6 | 10725194 | A | A   | A   | Heterozygous CTC subset of CPP |
| chr6 | 17626388 | A | A   | A   | Heterozygous CTC subset of CPP |
| chr6 | 17648065 | A | A   | A   | Heterozygous CTC subset of CPP |
| chr6 | 17649494 | G | G   | G   | Heterozygous CTC subset of CPP |
| chr6 | 18161563 | G | A,G | G   | Heterozygous CTC subset of CPP |
| chr6 | 18237661 | C | C,T | C   | Heterozygous CTC subset of CPP |
| chr6 | 18264079 | T | T   | T   | Heterozygous CTC subset of CPP |
| chr6 | 18264210 | G | A,G | G   | Heterozygous CTC subset of CPP |
| chr6 | 18264658 | G | A,G | G   | Heterozygous CTC subset of CPP |
| chr6 | 24416739 | C | C   | C   | Heterozygous CTC subset of CPP |
| chr6 | 24418348 | G | A,G | G   | Heterozygous CTC subset of CPP |
| chr6 | 24653273 | G | C,G | G   | Heterozygous CTC subset of CPP |
| chr6 | 24653283 | T | C,T | T   | Heterozygous CTC subset of CPP |
| chr6 | 24653376 | G | A,G | A   | Heterozygous CTC subset of CPP |
| chr6 | 24698215 | G | A,G | A   | Heterozygous CTC subset of CPP |
| chr6 | 24701812 | A | A   | A   | Heterozygous CTC subset of CPP |
| chr6 | 24720065 | T | T   | T   | Heterozygous CTC subset of CPP |
| chr6 | 26157119 | C | C   | C   | Heterozygous CTC subset of CPP |
| chr6 | 26285683 | T | C,T | C   | Heterozygous CTC subset of CPP |
| chr6 | 26545632 | G | A,G | A,G | Heterozygous CTC subset of CPP |
| chr6 | 26597237 | C | C,T | C   | Heterozygous CTC subset of CPP |
| chr6 | 26597333 | A | A,G | A,G | Heterozygous CTC subset of CPP |
| chr6 | 26598772 | C | C   | C   | Heterozygous CTC subset of CPP |
| chr6 | 27114415 | T | T   | T   | Heterozygous CTC subset of CPP |
| chr6 | 29855952 | A | C   | C   | Heterozygous CTC subset of CPP |
| chr6 | 29856397 | T | C,T | T   | Heterozygous CTC subset of CPP |
| chr6 | 29856402 | A | A,C | A   | Heterozygous CTC subset of CPP |
| chr6 | 29856406 | G | A,G | G   | Heterozygous CTC subset of CPP |

Grillet et al., Supplementary Table 5

|      |          |   |      |      |                                |
|------|----------|---|------|------|--------------------------------|
| chr6 | 29856411 | T | T    | T    | Heterozygous CTC subset of CPP |
| chr6 | 29857245 | G | G    | G    | Heterozygous CTC subset of CPP |
| chr6 | 29857354 | C | C    | C    | Heterozygous CTC subset of CPP |
| chr6 | 29857360 | G | A    | A    | Heterozygous CTC subset of CPP |
| chr6 | 29910378 | C | C,T  | C    | Heterozygous CTC subset of CPP |
| chr6 | 29910402 | G | A,G  | A,G  | Heterozygous CTC subset of CPP |
| chr6 | 29910538 | C | C,T  | C    | Heterozygous CTC subset of CPP |
| chr6 | 29910558 | T | C,T  | C,T  | Heterozygous CTC subset of CPP |
| chr6 | 29910604 | C | A,C  | C    | Heterozygous CTC subset of CPP |
| chr6 | 29910700 | G | G,T  | G    | Heterozygous CTC subset of CPP |
| chr6 | 29910716 | C | C,G  | C,G  | Heterozygous CTC subset of CPP |
| chr6 | 29910725 | C | C,G  | C,G  | Heterozygous CTC subset of CPP |
| chr6 | 29910742 | G | C,G  | C    | Heterozygous CTC subset of CPP |
| chr6 | 29910752 | G | C,G  | G    | Heterozygous CTC subset of CPP |
| chr6 | 29911064 | A | A,G  | A,G  | Heterozygous CTC subset of CPP |
| chr6 | 29911069 | A | A,T  | A,T  | Heterozygous CTC subset of CPP |
| chr6 | 29911198 | T | T    | T    | Heterozygous CTC subset of CPP |
| chr6 | 29911207 | G | A,G  | G    | Heterozygous CTC subset of CPP |
| chr6 | 29911901 | C | C,G  | C    | Heterozygous CTC subset of CPP |
| chr6 | 29912041 | C | C,T  | C,T  | Heterozygous CTC subset of CPP |
| chr6 | 29912108 | G | C,G  | G    | Heterozygous CTC subset of CPP |
| chr6 | 29912147 | C | C,T  | C    | Heterozygous CTC subset of CPP |
| chr6 | 29912333 | C | C,T  | C    | Heterozygous CTC subset of CPP |
| chr6 | 29912386 | G | C,G  | C,G  | Heterozygous CTC subset of CPP |
| chr6 | 30153862 | A | A    | A    | Heterozygous CTC subset of CPP |
| chr6 | 30154179 | C | C    | C    | Heterozygous CTC subset of CPP |
| chr6 | 30154199 | T | C,T  | T    | Heterozygous CTC subset of CPP |
| chr6 | 30166266 | C | C    | C    | Heterozygous CTC subset of CPP |
| chr6 | 30166300 | T | +C,T | +C,T | Heterozygous CTC subset of CPP |
| chr6 | 30313268 | G | A,G  | G    | Heterozygous CTC subset of CPP |
| chr6 | 30457732 | T | C,T  | C    | Heterozygous CTC subset of CPP |
| chr6 | 30458064 | G | A,G  | A,G  | Heterozygous CTC subset of CPP |
| chr6 | 30458966 | C | C    | C    | Heterozygous CTC subset of CPP |
| chr6 | 30521137 | G | A,G  | A    | Heterozygous CTC subset of CPP |
| chr6 | 30551464 | A | A,G  | A    | Heterozygous CTC subset of CPP |
| chr6 | 30558477 | G | +A,G | +A,G | Heterozygous CTC subset of CPP |
| chr6 | 30570086 | C | C    | C    | Heterozygous CTC subset of CPP |
| chr6 | 30571585 | A | A    | A    | Heterozygous CTC subset of CPP |
| chr6 | 30587378 | G | G    | G    | Heterozygous CTC subset of CPP |
| chr6 | 30638725 | T | T    | T    | Heterozygous CTC subset of CPP |
| chr6 | 30867833 | G | G    | G    | Heterozygous CTC subset of CPP |
| chr6 | 31118797 | C | C    | C    | Heterozygous CTC subset of CPP |
| chr6 | 31238191 | C | C    | C    | Heterozygous CTC subset of CPP |
| chr6 | 31238851 | T | C,T  | C    | Heterozygous CTC subset of CPP |
| chr6 | 31238868 | C | C    | C    | Heterozygous CTC subset of CPP |
| chr6 | 31238898 | A | A    | A    | Heterozygous CTC subset of CPP |

Grillet et al., Supplementary Table 5

|      |          |   |      |      |                                |
|------|----------|---|------|------|--------------------------------|
| chr6 | 31238899 | C | C    | C    | Heterozygous CTC subset of CPP |
| chr6 | 31239050 | G | A,G  | A    | Heterozygous CTC subset of CPP |
| chr6 | 31239114 | G | A,G  | G    | Heterozygous CTC subset of CPP |
| chr6 | 31239506 | C | C,G  | C    | Heterozygous CTC subset of CPP |
| chr6 | 31324025 | G | G    | G    | Heterozygous CTC subset of CPP |
| chr6 | 31324110 | G | G    | G    | Heterozygous CTC subset of CPP |
| chr6 | 31324144 | T | T    | T    | Heterozygous CTC subset of CPP |
| chr6 | 31324145 | A | A    | A    | Heterozygous CTC subset of CPP |
| chr6 | 31371430 | T | C,T  | C    | Heterozygous CTC subset of CPP |
| chr6 | 31378387 | T | C,T  | T    | Heterozygous CTC subset of CPP |
| chr6 | 31379951 | A | A    | A    | Heterozygous CTC subset of CPP |
| chr6 | 31502308 | T | T    | T    | Heterozygous CTC subset of CPP |
| chr6 | 31506624 | T | C,T  | C    | Heterozygous CTC subset of CPP |
| chr6 | 31594628 | T | A,T  | A    | Heterozygous CTC subset of CPP |
| chr6 | 31595882 | C | A,C  | A,C  | Heterozygous CTC subset of CPP |
| chr6 | 31597462 | G | G    | G    | Heterozygous CTC subset of CPP |
| chr6 | 31599565 | C | C    | C    | Heterozygous CTC subset of CPP |
| chr6 | 31601344 | T | C,T  | C,T  | Heterozygous CTC subset of CPP |
| chr6 | 31604010 | C | C,G  | C,G  | Heterozygous CTC subset of CPP |
| chr6 | 31604044 | T | G,T  | G    | Heterozygous CTC subset of CPP |
| chr6 | 31610686 | A | A,G  | G    | Heterozygous CTC subset of CPP |
| chr6 | 31655633 | T | T    | T    | Heterozygous CTC subset of CPP |
| chr6 | 31657413 | T | C,T  | C,T  | Heterozygous CTC subset of CPP |
| chr6 | 31695085 | A | A    | A    | Heterozygous CTC subset of CPP |
| chr6 | 31748718 | G | +C,G | +C,G | Heterozygous CTC subset of CPP |
| chr6 | 31762843 | G | C,G  | C,G  | Heterozygous CTC subset of CPP |
| chr6 | 31762844 | G | G,T  | G,T  | Heterozygous CTC subset of CPP |
| chr6 | 31773902 | G | G    | G    | Heterozygous CTC subset of CPP |
| chr6 | 31785228 | G | C    | C    | Heterozygous CTC subset of CPP |
| chr6 | 31785438 | C | C    | C    | Heterozygous CTC subset of CPP |
| chr6 | 31795825 | A | A    | A    | Heterozygous CTC subset of CPP |
| chr6 | 31807441 | G | G    | G    | Heterozygous CTC subset of CPP |
| chr6 | 31807446 | A | A    | A    | Heterozygous CTC subset of CPP |
| chr6 | 31850706 | T | T    | T    | Heterozygous CTC subset of CPP |
| chr6 | 31860337 | T | C,T  | C    | Heterozygous CTC subset of CPP |
| chr6 | 31864547 | G | G,T  | G,T  | Heterozygous CTC subset of CPP |
| chr6 | 31928084 | A | A    | A    | Heterozygous CTC subset of CPP |
| chr6 | 31936668 | T | C,T  | C    | Heterozygous CTC subset of CPP |
| chr6 | 32138005 | T | T    | T    | Heterozygous CTC subset of CPP |
| chr6 | 32148075 | T | T    | T    | Heterozygous CTC subset of CPP |
| chr6 | 32939894 | G | G,T  | G,T  | Heterozygous CTC subset of CPP |
| chr6 | 32942302 | G | A,G  | G    | Heterozygous CTC subset of CPP |
| chr6 | 33163811 | T | T    | T    | Heterozygous CTC subset of CPP |
| chr6 | 33167124 | C | C    | C    | Heterozygous CTC subset of CPP |
| chr6 | 33167126 | A | A    | A    | Heterozygous CTC subset of CPP |
| chr6 | 33235713 | A | A    | A    | Heterozygous CTC subset of CPP |

Grillet et al., Supplementary Table 5

|      |          |   |      |      |                                |
|------|----------|---|------|------|--------------------------------|
| chr6 | 33235755 | G | A,G  | A,G  | Heterozygous CTC subset of CPP |
| chr6 | 33243842 | A | A,G  | A,G  | Heterozygous CTC subset of CPP |
| chr6 | 33244018 | C | C    | C    | Heterozygous CTC subset of CPP |
| chr6 | 33244021 | T | T    | T    | Heterozygous CTC subset of CPP |
| chr6 | 33256653 | G | A,G  | G    | Heterozygous CTC subset of CPP |
| chr6 | 33258228 | G | -G,G | -G,G | Heterozygous CTC subset of CPP |
| chr6 | 33258620 | T | T    | T    | Heterozygous CTC subset of CPP |
| chr6 | 33272855 | G | C,G  | C,G  | Heterozygous CTC subset of CPP |
| chr6 | 33272931 | C | C    | C    | Heterozygous CTC subset of CPP |
| chr6 | 33281842 | G | G,T  | G    | Heterozygous CTC subset of CPP |
| chr6 | 33281843 | A | A,T  | A    | Heterozygous CTC subset of CPP |
| chr6 | 33288271 | A | A,G  | A    | Heterozygous CTC subset of CPP |
| chr6 | 33371619 | A | A    | A    | Heterozygous CTC subset of CPP |
| chr6 | 33625744 | G | G    | G    | Heterozygous CTC subset of CPP |
| chr6 | 33638180 | C | C,T  | C    | Heterozygous CTC subset of CPP |
| chr6 | 33643558 | G | A,G  | A,G  | Heterozygous CTC subset of CPP |
| chr6 | 33652668 | A | A    | A    | Heterozygous CTC subset of CPP |
| chr6 | 33655024 | T | T    | T    | Heterozygous CTC subset of CPP |
| chr6 | 33655855 | C | C    | C    | Heterozygous CTC subset of CPP |
| chr6 | 33659394 | A | A    | A    | Heterozygous CTC subset of CPP |
| chr6 | 33745003 | C | C    | C    | Heterozygous CTC subset of CPP |
| chr6 | 33754540 | G | G    | G    | Heterozygous CTC subset of CPP |
| chr6 | 34208510 | C | C,G  | G    | Heterozygous CTC subset of CPP |
| chr6 | 34208511 | C | C    | C    | Heterozygous CTC subset of CPP |
| chr6 | 34208512 | A | -A,A | -A   | Heterozygous CTC subset of CPP |
| chr6 | 34850779 | G | G    | G    | Heterozygous CTC subset of CPP |
| chr6 | 34850826 | G | C,G  | G    | Heterozygous CTC subset of CPP |
| chr6 | 35392165 | G | G    | G    | Heterozygous CTC subset of CPP |
| chr6 | 35437297 | A | A    | A    | Heterozygous CTC subset of CPP |
| chr6 | 35803192 | C | A,C  | C    | Heterozygous CTC subset of CPP |
| chr6 | 35838144 | C | C    | C    | Heterozygous CTC subset of CPP |
| chr6 | 35838271 | C | C    | C    | Heterozygous CTC subset of CPP |
| chr6 | 36098410 | A | C    | C    | Heterozygous CTC subset of CPP |
| chr6 | 36103535 | T | T    | T    | Heterozygous CTC subset of CPP |
| chr6 | 36569486 | T | T    | T    | Heterozygous CTC subset of CPP |
| chr6 | 36569546 | T | T    | T    | Heterozygous CTC subset of CPP |
| chr6 | 36652062 | G | G    | G    | Heterozygous CTC subset of CPP |
| chr6 | 36824399 | C | C,T  | C    | Heterozygous CTC subset of CPP |
| chr6 | 36870171 | G | G    | G    | Heterozygous CTC subset of CPP |
| chr6 | 36882353 | A | A,G  | A,G  | Heterozygous CTC subset of CPP |
| chr6 | 37328240 | T | T    | T    | Heterozygous CTC subset of CPP |
| chr6 | 37349033 | G | A,G  | A,G  | Heterozygous CTC subset of CPP |
| chr6 | 38650628 | T | G,T  | G,T  | Heterozygous CTC subset of CPP |
| chr6 | 38670837 | G | A,G  | A,G  | Heterozygous CTC subset of CPP |
| chr6 | 41533573 | G | A,G  | G    | Heterozygous CTC subset of CPP |
| chr6 | 41899193 | T | T    | T    | Heterozygous CTC subset of CPP |



Grillet et al., Supplementary Table 5

|      |           |   |     |     |                                |
|------|-----------|---|-----|-----|--------------------------------|
| chr6 | 41903782  | A | A,C | C   | Heterozygous CTC subset of CPP |
| chr6 | 42185564  | A | A,C | A   | Heterozygous CTC subset of CPP |
| chr6 | 42979015  | G | A,G | G   | Heterozygous CTC subset of CPP |
| chr6 | 43022095  | C | C   | C   | Heterozygous CTC subset of CPP |
| chr6 | 43109751  | G | A,G | A,G | Heterozygous CTC subset of CPP |
| chr6 | 43114375  | T | T   | T   | Heterozygous CTC subset of CPP |
| chr6 | 43472948  | C | C   | C   | Heterozygous CTC subset of CPP |
| chr6 | 43480051  | T | T   | T   | Heterozygous CTC subset of CPP |
| chr6 | 43488450  | A | A   | A   | Heterozygous CTC subset of CPP |
| chr6 | 43521152  | C | C   | C   | Heterozygous CTC subset of CPP |
| chr6 | 43530004  | T | T   | T   | Heterozygous CTC subset of CPP |
| chr6 | 43607828  | T | T   | T   | Heterozygous CTC subset of CPP |
| chr6 | 43738518  | C | C   | C   | Heterozygous CTC subset of CPP |
| chr6 | 43742128  | A | A   | A   | Heterozygous CTC subset of CPP |
| chr6 | 44218120  | A | A,G | G   | Heterozygous CTC subset of CPP |
| chr6 | 44219327  | A | A   | A   | Heterozygous CTC subset of CPP |
| chr6 | 44361309  | G | A,G | G   | Heterozygous CTC subset of CPP |
| chr6 | 44371690  | T | C,T | T   | Heterozygous CTC subset of CPP |
| chr6 | 44414417  | T | T   | T   | Heterozygous CTC subset of CPP |
| chr6 | 47253764  | A | A   | A   | Heterozygous CTC subset of CPP |
| chr6 | 52129484  | C | C,T | T   | Heterozygous CTC subset of CPP |
| chr6 | 52548923  | T | T   | T   | Heterozygous CTC subset of CPP |
| chr6 | 53365292  | A | A   | A   | Heterozygous CTC subset of CPP |
| chr6 | 64394096  | C | C   | C   | Heterozygous CTC subset of CPP |
| chr6 | 64394538  | T | C,T | T   | Heterozygous CTC subset of CPP |
| chr6 | 64394840  | A | A   | A   | Heterozygous CTC subset of CPP |
| chr6 | 64395018  | A | A   | A   | Heterozygous CTC subset of CPP |
| chr6 | 64408416  | C | C   | C   | Heterozygous CTC subset of CPP |
| chr6 | 71566660  | A | A   | A   | Heterozygous CTC subset of CPP |
| chr6 | 74228219  | T | T   | T   | Heterozygous CTC subset of CPP |
| chr6 | 74228823  | A | A   | A   | Heterozygous CTC subset of CPP |
| chr6 | 75994151  | A | A,G | A   | Heterozygous CTC subset of CPP |
| chr6 | 76376552  | G | A,G | A,G | Heterozygous CTC subset of CPP |
| chr6 | 76405579  | C | C   | C   | Heterozygous CTC subset of CPP |
| chr6 | 76423460  | C | C   | C   | Heterozygous CTC subset of CPP |
| chr6 | 76576317  | G | G   | G   | Heterozygous CTC subset of CPP |
| chr6 | 82914610  | A | A   | A   | Heterozygous CTC subset of CPP |
| chr6 | 83921738  | A | A   | A   | Heterozygous CTC subset of CPP |
| chr6 | 83937144  | A | A   | A   | Heterozygous CTC subset of CPP |
| chr6 | 88187196  | A | A,G | A   | Heterozygous CTC subset of CPP |
| chr6 | 88239266  | T | C,T | T   | Heterozygous CTC subset of CPP |
| chr6 | 89790683  | T | T   | T   | Heterozygous CTC subset of CPP |
| chr6 | 89793703  | A | A   | A   | Heterozygous CTC subset of CPP |
| chr6 | 89793894  | G | C,G | G   | Heterozygous CTC subset of CPP |
| chr6 | 99857116  | T | T   | T   | Heterozygous CTC subset of CPP |
| chr6 | 100009547 | T | T   | T   | Heterozygous CTC subset of CPP |

Grillet et al., Supplementary Table 5

|      |           |   |      |   |                                |
|------|-----------|---|------|---|--------------------------------|
| chr6 | 105729627 | A | A    | A | Heterozygous CTC subset of CPP |
| chr6 | 105776866 | A | A,C  | A | Heterozygous CTC subset of CPP |
| chr6 | 105821449 | A | A,G  | G | Heterozygous CTC subset of CPP |
| chr6 | 106634457 | A | A    | A | Heterozygous CTC subset of CPP |
| chr6 | 108214704 | T | T    | T | Heterozygous CTC subset of CPP |
| chr6 | 108214773 | C | C    | C | Heterozygous CTC subset of CPP |
| chr6 | 108222663 | A | A    | A | Heterozygous CTC subset of CPP |
| chr6 | 108222698 | A | A    | A | Heterozygous CTC subset of CPP |
| chr6 | 109689431 | A | A,G  | A | Heterozygous CTC subset of CPP |
| chr6 | 111288822 | A | A    | A | Heterozygous CTC subset of CPP |
| chr6 | 111306341 | G | G    | G | Heterozygous CTC subset of CPP |
| chr6 | 114181209 | G | G    | G | Heterozygous CTC subset of CPP |
| chr6 | 114181408 | C | C    | C | Heterozygous CTC subset of CPP |
| chr6 | 116599665 | T | T    | T | Heterozygous CTC subset of CPP |
| chr6 | 116600464 | T | T    | T | Heterozygous CTC subset of CPP |
| chr6 | 116600774 | C | C,G  | C | Heterozygous CTC subset of CPP |
| chr6 | 122775327 | T | T    | T | Heterozygous CTC subset of CPP |
| chr6 | 122775333 | A | A    | A | Heterozygous CTC subset of CPP |
| chr6 | 122777703 | A | A    | A | Heterozygous CTC subset of CPP |
| chr6 | 126359939 | T | T    | T | Heterozygous CTC subset of CPP |
| chr6 | 126661502 | G | G,T  | G | Heterozygous CTC subset of CPP |
| chr6 | 127648201 | A | A    | A | Heterozygous CTC subset of CPP |
| chr6 | 133135886 | A | A,G  | G | Heterozygous CTC subset of CPP |
| chr6 | 133136229 | T | T    | T | Heterozygous CTC subset of CPP |
| chr6 | 135317974 | A | A,T  | A | Heterozygous CTC subset of CPP |
| chr6 | 136588310 | G | +A,G | G | Heterozygous CTC subset of CPP |
| chr6 | 136589360 | A | A    | A | Heterozygous CTC subset of CPP |
| chr6 | 136596696 | A | A,G  | A | Heterozygous CTC subset of CPP |
| chr6 | 136667088 | T | T    | T | Heterozygous CTC subset of CPP |
| chr6 | 136682172 | G | A,G  | A | Heterozygous CTC subset of CPP |
| chr6 | 137522045 | T | T    | T | Heterozygous CTC subset of CPP |
| chr6 | 138413206 | C | C,T  | C | Heterozygous CTC subset of CPP |
| chr6 | 138413269 | A | A,G  | G | Heterozygous CTC subset of CPP |
| chr6 | 138413333 | G | C,G  | C | Heterozygous CTC subset of CPP |
| chr6 | 142539697 | A | A    | A | Heterozygous CTC subset of CPP |
| chr6 | 143825104 | G | G,T  | T | Heterozygous CTC subset of CPP |
| chr6 | 144181619 | A | A,G  | A | Heterozygous CTC subset of CPP |
| chr6 | 144181685 | A | A    | A | Heterozygous CTC subset of CPP |
| chr6 | 149699568 | A | A    | A | Heterozygous CTC subset of CPP |
| chr6 | 149730846 | G | A,G  | G | Heterozygous CTC subset of CPP |
| chr6 | 149893669 | T | T    | T | Heterozygous CTC subset of CPP |
| chr6 | 150111103 | T | T    | T | Heterozygous CTC subset of CPP |
| chr6 | 150114745 | G | A,G  | A | Heterozygous CTC subset of CPP |
| chr6 | 151204022 | G | G    | G | Heterozygous CTC subset of CPP |
| chr6 | 151226841 | T | T    | T | Heterozygous CTC subset of CPP |
| chr6 | 153296632 | A | A    | A | Heterozygous CTC subset of CPP |

Grillet et al., Supplementary Table 5

|      |           |   |      |      |                                |
|------|-----------|---|------|------|--------------------------------|
| chr6 | 155131342 | G | G    | G    | Heterozygous CTC subset of CPP |
| chr6 | 158613161 | A | A    | A    | Heterozygous CTC subset of CPP |
| chr6 | 159058926 | C | C    | C    | Heterozygous CTC subset of CPP |
| chr6 | 159065758 | C | C,G  | G    | Heterozygous CTC subset of CPP |
| chr6 | 160103566 | A | A    | A    | Heterozygous CTC subset of CPP |
| chr6 | 160113872 | A | A,G  | A    | Heterozygous CTC subset of CPP |
| chr6 | 160196343 | A | A,G  | G    | Heterozygous CTC subset of CPP |
| chr6 | 160198395 | G | A,G  | A    | Heterozygous CTC subset of CPP |
| chr6 | 160205098 | G | +C,G | +C,G | Heterozygous CTC subset of CPP |
| chr6 | 160206526 | T | T    | T    | Heterozygous CTC subset of CPP |
| chr6 | 160206948 | A | A    | A    | Heterozygous CTC subset of CPP |
| chr6 | 160450668 | G | G    | G    | Heterozygous CTC subset of CPP |
| chr6 | 160482820 | A | A    | A    | Heterozygous CTC subset of CPP |
| chr6 | 160499281 | T | T    | T    | Heterozygous CTC subset of CPP |
| chr6 | 166736362 | C | C,T  | T    | Heterozygous CTC subset of CPP |
| chr6 | 166755975 | T | C,T  | C    | Heterozygous CTC subset of CPP |
| chr6 | 166755979 | A | A,C  | C    | Heterozygous CTC subset of CPP |
| chr6 | 168312010 | T | T    | T    | Heterozygous CTC subset of CPP |
| chr6 | 168363117 | A | A    | A    | Heterozygous CTC subset of CPP |
| chr6 | 170112499 | T | T    | T    | Heterozygous CTC subset of CPP |
| chr6 | 170118969 | T | T    | T    | Heterozygous CTC subset of CPP |
| chr6 | 170124030 | G | A,G  | G    | Heterozygous CTC subset of CPP |
| chr6 | 170886773 | A | A    | A    | Heterozygous CTC subset of CPP |
| chr6 | 170891316 | A | A    | A    | Heterozygous CTC subset of CPP |
| chr7 | 590199    | A | A,G  | A    | Heterozygous CTC subset of CPP |
| chr7 | 810219    | T | C,T  | C,T  | Heterozygous CTC subset of CPP |
| chr7 | 814754    | T | T    | T    | Heterozygous CTC subset of CPP |
| chr7 | 881668    | C | C,T  | C,T  | Heterozygous CTC subset of CPP |
| chr7 | 883105    | C | C,T  | C    | Heterozygous CTC subset of CPP |
| chr7 | 889169    | A | A,G  | A    | Heterozygous CTC subset of CPP |
| chr7 | 889592    | G | A,G  | G    | Heterozygous CTC subset of CPP |
| chr7 | 897492    | A | A,G  | A    | Heterozygous CTC subset of CPP |
| chr7 | 897496    | G | A,G  | G    | Heterozygous CTC subset of CPP |
| chr7 | 909003    | T | T    | T    | Heterozygous CTC subset of CPP |
| chr7 | 930689    | C | C,T  | C    | Heterozygous CTC subset of CPP |
| chr7 | 932054    | G | G    | G    | Heterozygous CTC subset of CPP |
| chr7 | 943868    | G | A,G  | G    | Heterozygous CTC subset of CPP |
| chr7 | 1513296   | A | A    | A    | Heterozygous CTC subset of CPP |
| chr7 | 1518057   | G | G    | G    | Heterozygous CTC subset of CPP |
| chr7 | 1527082   | C | C    | C    | Heterozygous CTC subset of CPP |
| chr7 | 1542697   | G | A,G  | A    | Heterozygous CTC subset of CPP |
| chr7 | 1542814   | T | C,T  | C    | Heterozygous CTC subset of CPP |
| chr7 | 1543981   | C | A,C  | A    | Heterozygous CTC subset of CPP |
| chr7 | 2257616   | T | T    | T    | Heterozygous CTC subset of CPP |
| chr7 | 2265085   | T | T    | T    | Heterozygous CTC subset of CPP |
| chr7 | 2309209   | C | C,T  | C    | Heterozygous CTC subset of CPP |

Grillet et al., Supplementary Table 5

|      |          |   |        |        |                                |
|------|----------|---|--------|--------|--------------------------------|
| chr7 | 2394746  | T | C,T    | C      | Heterozygous CTC subset of CPP |
| chr7 | 2671862  | T | G,T    | T      | Heterozygous CTC subset of CPP |
| chr7 | 2883684  | T | T      | T      | Heterozygous CTC subset of CPP |
| chr7 | 5269337  | G | G      | G      | Heterozygous CTC subset of CPP |
| chr7 | 5269338  | T | T      | T      | Heterozygous CTC subset of CPP |
| chr7 | 5391718  | G | G      | G      | Heterozygous CTC subset of CPP |
| chr7 | 5399044  | C | C,G    | C      | Heterozygous CTC subset of CPP |
| chr7 | 5410425  | G | C,G    | G      | Heterozygous CTC subset of CPP |
| chr7 | 5430137  | T | T      | T      | Heterozygous CTC subset of CPP |
| chr7 | 5434135  | A | A,G    | G      | Heterozygous CTC subset of CPP |
| chr7 | 5567523  | C | +T,C   | +T,C   | Heterozygous CTC subset of CPP |
| chr7 | 5567527  | G | T      | T      | Heterozygous CTC subset of CPP |
| chr7 | 5569295  | C | +T,C   | +T,C   | Heterozygous CTC subset of CPP |
| chr7 | 5569296  | T | +G,G,T | +G,G,T | Heterozygous CTC subset of CPP |
| chr7 | 5569300  | A | A,G    | A,G    | Heterozygous CTC subset of CPP |
| chr7 | 6063283  | C | C,T    | C,T    | Heterozygous CTC subset of CPP |
| chr7 | 6066461  | T | C,T    | T      | Heterozygous CTC subset of CPP |
| chr7 | 11022230 | A | A,G    | G      | Heterozygous CTC subset of CPP |
| chr7 | 11022564 | G | A,G    | A      | Heterozygous CTC subset of CPP |
| chr7 | 11053468 | T | T      | T      | Heterozygous CTC subset of CPP |
| chr7 | 11075334 | G | G      | G      | Heterozygous CTC subset of CPP |
| chr7 | 16816746 | A | A      | A      | Heterozygous CTC subset of CPP |
| chr7 | 16823095 | G | A,G    | A,G    | Heterozygous CTC subset of CPP |
| chr7 | 19738023 | C | C      | C      | Heterozygous CTC subset of CPP |
| chr7 | 21956405 | G | A,G    | G      | Heterozygous CTC subset of CPP |
| chr7 | 22857666 | T | +C,T   | +C,T   | Heterozygous CTC subset of CPP |
| chr7 | 22857669 | T | A,C    | A      | Heterozygous CTC subset of CPP |
| chr7 | 22857670 | G | G      | G      | Heterozygous CTC subset of CPP |
| chr7 | 23239112 | A | A      | A      | Heterozygous CTC subset of CPP |
| chr7 | 23347554 | T | T      | T      | Heterozygous CTC subset of CPP |
| chr7 | 23547047 | T | T      | T      | Heterozygous CTC subset of CPP |
| chr7 | 23552637 | T | T      | T      | Heterozygous CTC subset of CPP |
| chr7 | 25163310 | T | C,T    | C,T    | Heterozygous CTC subset of CPP |
| chr7 | 25163466 | T | C,G,T  | C,T    | Heterozygous CTC subset of CPP |
| chr7 | 26225113 | A | A      | A      | Heterozygous CTC subset of CPP |
| chr7 | 26225348 | A | A      | A      | Heterozygous CTC subset of CPP |
| chr7 | 26240191 | C | C      | C      | Heterozygous CTC subset of CPP |
| chr7 | 26246122 | A | A      | A      | Heterozygous CTC subset of CPP |
| chr7 | 26248152 | A | A      | A      | Heterozygous CTC subset of CPP |
| chr7 | 26248153 | A | A      | A      | Heterozygous CTC subset of CPP |
| chr7 | 26709721 | A | A      | A      | Heterozygous CTC subset of CPP |
| chr7 | 27689173 | A | A      | A      | Heterozygous CTC subset of CPP |
| chr7 | 27805640 | G | -G,G   | -G,G   | Heterozygous CTC subset of CPP |
| chr7 | 30538543 | A | A      | A      | Heterozygous CTC subset of CPP |
| chr7 | 30671157 | T | T      | T      | Heterozygous CTC subset of CPP |
| chr7 | 30673512 | T | T      | T      | Heterozygous CTC subset of CPP |

Grillet et al., Supplementary Table 5

|      |          |   |      |      |                                |
|------|----------|---|------|------|--------------------------------|
| chr7 | 30673513 | A | -A,A | -A,A | Heterozygous CTC subset of CPP |
| chr7 | 32529936 | G | C,G  | G    | Heterozygous CTC subset of CPP |
| chr7 | 32612927 | T | T    | T    | Heterozygous CTC subset of CPP |
| chr7 | 32613020 | A | A,G  | G    | Heterozygous CTC subset of CPP |
| chr7 | 32909304 | A | A    | A    | Heterozygous CTC subset of CPP |
| chr7 | 32909431 | A | A    | A    | Heterozygous CTC subset of CPP |
| chr7 | 33054022 | T | T    | T    | Heterozygous CTC subset of CPP |
| chr7 | 35903187 | A | A    | A    | Heterozygous CTC subset of CPP |
| chr7 | 36435882 | T | T    | T    | Heterozygous CTC subset of CPP |
| chr7 | 36438709 | C | C,G  | C    | Heterozygous CTC subset of CPP |
| chr7 | 36446073 | T | T    | T    | Heterozygous CTC subset of CPP |
| chr7 | 36455477 | T | C,T  | T    | Heterozygous CTC subset of CPP |
| chr7 | 38259245 | T | T    | T    | Heterozygous CTC subset of CPP |
| chr7 | 38860836 | T | T    | T    | Heterozygous CTC subset of CPP |
| chr7 | 39736385 | C | +A,C | C    | Heterozygous CTC subset of CPP |
| chr7 | 39736386 | A | A    | A    | Heterozygous CTC subset of CPP |
| chr7 | 40172675 | C | C    | C    | Heterozygous CTC subset of CPP |
| chr7 | 44163140 | G | G    | G    | Heterozygous CTC subset of CPP |
| chr7 | 44507629 | T | T    | T    | Heterozygous CTC subset of CPP |
| chr7 | 44507792 | C | C,T  | C    | Heterozygous CTC subset of CPP |
| chr7 | 44507820 | A | A,G  | A    | Heterozygous CTC subset of CPP |
| chr7 | 44530193 | T | G,T  | T    | Heterozygous CTC subset of CPP |
| chr7 | 44606098 | C | C,T  | T    | Heterozygous CTC subset of CPP |
| chr7 | 44619227 | A | A    | A    | Heterozygous CTC subset of CPP |
| chr7 | 44620836 | C | A,C  | A    | Heterozygous CTC subset of CPP |
| chr7 | 44737380 | T | T    | T    | Heterozygous CTC subset of CPP |
| chr7 | 44737806 | T | T    | T    | Heterozygous CTC subset of CPP |
| chr7 | 44795897 | G | G    | G    | Heterozygous CTC subset of CPP |
| chr7 | 44800176 | G | G,T  | G    | Heterozygous CTC subset of CPP |
| chr7 | 45023503 | T | A,T  | A,T  | Heterozygous CTC subset of CPP |
| chr7 | 45103559 | T | T    | T    | Heterozygous CTC subset of CPP |
| chr7 | 45104079 | G | G    | G    | Heterozygous CTC subset of CPP |
| chr7 | 45109471 | T | T    | T    | Heterozygous CTC subset of CPP |
| chr7 | 45148667 | G | A,G  | A,G  | Heterozygous CTC subset of CPP |
| chr7 | 45148773 | C | A,C  | A,C  | Heterozygous CTC subset of CPP |
| chr7 | 48018123 | A | A    | A    | Heterozygous CTC subset of CPP |
| chr7 | 56051444 | A | A    | A    | Heterozygous CTC subset of CPP |
| chr7 | 56052558 | T | T    | T    | Heterozygous CTC subset of CPP |
| chr7 | 56122076 | A | A    | A    | Heterozygous CTC subset of CPP |
| chr7 | 56130743 | A | A,G  | A    | Heterozygous CTC subset of CPP |
| chr7 | 65413747 | A | A    | A    | Heterozygous CTC subset of CPP |
| chr7 | 65435283 | C | C    | C    | Heterozygous CTC subset of CPP |
| chr7 | 65439988 | G | G    | G    | Heterozygous CTC subset of CPP |
| chr7 | 66459256 | T | C,T  | T    | Heterozygous CTC subset of CPP |
| chr7 | 72891754 | C | C,T  | T    | Heterozygous CTC subset of CPP |
| chr7 | 72892512 | C | C    | C    | Heterozygous CTC subset of CPP |

Grillet et al., Supplementary Table 5

|      |          |   |     |     |                                |
|------|----------|---|-----|-----|--------------------------------|
| chr7 | 72984865 | A | A   | A   | Heterozygous CTC subset of CPP |
| chr7 | 73097082 | A | A,G | A   | Heterozygous CTC subset of CPP |
| chr7 | 73097291 | G | G   | G   | Heterozygous CTC subset of CPP |
| chr7 | 73097294 | A | A   | A   | Heterozygous CTC subset of CPP |
| chr7 | 73097713 | G | A,G | G   | Heterozygous CTC subset of CPP |
| chr7 | 73151644 | A | A,G | A,G | Heterozygous CTC subset of CPP |
| chr7 | 73530255 | A | A   | A   | Heterozygous CTC subset of CPP |
| chr7 | 73602090 | T | T   | T   | Heterozygous CTC subset of CPP |
| chr7 | 73929872 | T | T   | T   | Heterozygous CTC subset of CPP |
| chr7 | 74148303 | T | T   | T   | Heterozygous CTC subset of CPP |
| chr7 | 74159250 | G | G   | G   | Heterozygous CTC subset of CPP |
| chr7 | 75508530 | G | G   | G   | Heterozygous CTC subset of CPP |
| chr7 | 75508537 | C | C   | C   | Heterozygous CTC subset of CPP |
| chr7 | 75511453 | T | T   | T   | Heterozygous CTC subset of CPP |
| chr7 | 75615250 | T | T   | T   | Heterozygous CTC subset of CPP |
| chr7 | 75634714 | A | A   | A   | Heterozygous CTC subset of CPP |
| chr7 | 77221523 | C | C,T | C   | Heterozygous CTC subset of CPP |
| chr7 | 77247821 | G | A,G | A   | Heterozygous CTC subset of CPP |
| chr7 | 77256780 | T | T   | T   | Heterozygous CTC subset of CPP |
| chr7 | 77265140 | G | A,G | G   | Heterozygous CTC subset of CPP |
| chr7 | 77365770 | A | A,G | G   | Heterozygous CTC subset of CPP |
| chr7 | 77379049 | A | A   | A   | Heterozygous CTC subset of CPP |
| chr7 | 77408294 | A | A   | A   | Heterozygous CTC subset of CPP |
| chr7 | 77423459 | C | C   | C   | Heterozygous CTC subset of CPP |
| chr7 | 77423574 | G | A,G | A   | Heterozygous CTC subset of CPP |
| chr7 | 79818536 | T | T   | T   | Heterozygous CTC subset of CPP |
| chr7 | 90042025 | T | T   | T   | Heterozygous CTC subset of CPP |
| chr7 | 91630620 | G | G,T | G,T | Heterozygous CTC subset of CPP |
| chr7 | 91743150 | A | A,G | A,G | Heterozygous CTC subset of CPP |
| chr7 | 92027139 | C | C   | C   | Heterozygous CTC subset of CPP |
| chr7 | 93623654 | A | A   | A   | Heterozygous CTC subset of CPP |
| chr7 | 93628605 | A | A   | A   | Heterozygous CTC subset of CPP |
| chr7 | 95034734 | A | A   | A   | Heterozygous CTC subset of CPP |
| chr7 | 95750067 | A | A   | A   | Heterozygous CTC subset of CPP |
| chr7 | 95751287 | C | C   | C   | Heterozygous CTC subset of CPP |
| chr7 | 95800820 | T | C,T | T   | Heterozygous CTC subset of CPP |
| chr7 | 95813669 | A | A   | A   | Heterozygous CTC subset of CPP |
| chr7 | 97488569 | A | A,T | A,T | Heterozygous CTC subset of CPP |
| chr7 | 97922851 | C | C,T | C,T | Heterozygous CTC subset of CPP |
| chr7 | 97922875 | G | A,G | A,G | Heterozygous CTC subset of CPP |
| chr7 | 97933601 | C | C,T | T   | Heterozygous CTC subset of CPP |
| chr7 | 98951731 | T | T   | T   | Heterozygous CTC subset of CPP |
| chr7 | 99057709 | C | C   | C   | Heterozygous CTC subset of CPP |
| chr7 | 99057710 | T | T   | T   | Heterozygous CTC subset of CPP |
| chr7 | 99621530 | T | T   | T   | Heterozygous CTC subset of CPP |
| chr7 | 99631139 | C | C   | C   | Heterozygous CTC subset of CPP |

Grillet et al., Supplementary Table 5

|      |           |   |      |      |                                |
|------|-----------|---|------|------|--------------------------------|
| chr7 | 99696900  | A | A,T  | A,T  | Heterozygous CTC subset of CPP |
| chr7 | 99696901  | C | +A,C | +A,C | Heterozygous CTC subset of CPP |
| chr7 | 100028911 | T | T    | T    | Heterozygous CTC subset of CPP |
| chr7 | 100032977 | T | T    | T    | Heterozygous CTC subset of CPP |
| chr7 | 100175473 | T | C,T  | C    | Heterozygous CTC subset of CPP |
| chr7 | 100279320 | A | A    | A    | Heterozygous CTC subset of CPP |
| chr7 | 100279810 | A | A    | A    | Heterozygous CTC subset of CPP |
| chr7 | 100410597 | G | A,G  | A,G  | Heterozygous CTC subset of CPP |
| chr7 | 100411278 | T | C,T  | C,T  | Heterozygous CTC subset of CPP |
| chr7 | 100416250 | A | A,G  | A,G  | Heterozygous CTC subset of CPP |
| chr7 | 100482026 | T | C,T  | C,T  | Heterozygous CTC subset of CPP |
| chr7 | 100485674 | G | G    | G    | Heterozygous CTC subset of CPP |
| chr7 | 100731092 | G | G    | G    | Heterozygous CTC subset of CPP |
| chr7 | 100731811 | T | T    | T    | Heterozygous CTC subset of CPP |
| chr7 | 100852134 | C | C,G  | C    | Heterozygous CTC subset of CPP |
| chr7 | 100855215 | C | C,G  | C    | Heterozygous CTC subset of CPP |
| chr7 | 100858432 | T | T    | T    | Heterozygous CTC subset of CPP |
| chr7 | 101838835 | C | C    | C    | Heterozygous CTC subset of CPP |
| chr7 | 102038067 | G | G    | G    | Heterozygous CTC subset of CPP |
| chr7 | 102038071 | A | A    | A    | Heterozygous CTC subset of CPP |
| chr7 | 102065651 | C | C,T  | T    | Heterozygous CTC subset of CPP |
| chr7 | 102112980 | G | A,G  | A    | Heterozygous CTC subset of CPP |
| chr7 | 102114087 | C | C,T  | C    | Heterozygous CTC subset of CPP |
| chr7 | 102119322 | T | C,T  | C    | Heterozygous CTC subset of CPP |
| chr7 | 102939975 | A | A    | A    | Heterozygous CTC subset of CPP |
| chr7 | 102982340 | T | T    | T    | Heterozygous CTC subset of CPP |
| chr7 | 102995391 | T | T    | T    | Heterozygous CTC subset of CPP |
| chr7 | 103841405 | A | A    | A    | Heterozygous CTC subset of CPP |
| chr7 | 104748103 | T | T    | T    | Heterozygous CTC subset of CPP |
| chr7 | 105099627 | C | C,T  | C    | Heterozygous CTC subset of CPP |
| chr7 | 105146442 | A | A    | A    | Heterozygous CTC subset of CPP |
| chr7 | 107593989 | T | C,T  | C,T  | Heterozygous CTC subset of CPP |
| chr7 | 107603495 | A | A    | A    | Heterozygous CTC subset of CPP |
| chr7 | 108205483 | T | T    | T    | Heterozygous CTC subset of CPP |
| chr7 | 112102205 | A | A    | A    | Heterozygous CTC subset of CPP |
| chr7 | 112115486 | A | A    | A    | Heterozygous CTC subset of CPP |
| chr7 | 115850675 | C | C,T  | C    | Heterozygous CTC subset of CPP |
| chr7 | 117824239 | G | C,G  | C,G  | Heterozygous CTC subset of CPP |
| chr7 | 123332464 | T | T    | T    | Heterozygous CTC subset of CPP |
| chr7 | 123334869 | T | T    | T    | Heterozygous CTC subset of CPP |
| chr7 | 127569281 | G | G    | G    | Heterozygous CTC subset of CPP |
| chr7 | 127961332 | A | A    | A    | Heterozygous CTC subset of CPP |
| chr7 | 127979693 | T | T    | T    | Heterozygous CTC subset of CPP |
| chr7 | 128119402 | T | T    | T    | Heterozygous CTC subset of CPP |
| chr7 | 128388648 | G | A,G  | A    | Heterozygous CTC subset of CPP |
| chr7 | 128503113 | T | T    | T    | Heterozygous CTC subset of CPP |

Grillet et al., Supplementary Table 5

|      |           |   |     |     |                                |
|------|-----------|---|-----|-----|--------------------------------|
| chr7 | 128607384 | G | A,G | A,G | Heterozygous CTC subset of CPP |
| chr7 | 128612552 | C | C,T | C   | Heterozygous CTC subset of CPP |
| chr7 | 128614990 | G | A,G | G   | Heterozygous CTC subset of CPP |
| chr7 | 128641226 | G | C,G | C,G | Heterozygous CTC subset of CPP |
| chr7 | 129760684 | T | T   | T   | Heterozygous CTC subset of CPP |
| chr7 | 129813696 | A | A   | A   | Heterozygous CTC subset of CPP |
| chr7 | 130146634 | A | A   | A   | Heterozygous CTC subset of CPP |
| chr7 | 130147181 | T | T   | T   | Heterozygous CTC subset of CPP |
| chr7 | 130147209 | A | A   | A   | Heterozygous CTC subset of CPP |
| chr7 | 132470380 | T | T   | T   | Heterozygous CTC subset of CPP |
| chr7 | 132719386 | T | T   | T   | Heterozygous CTC subset of CPP |
| chr7 | 132720692 | A | A   | A   | Heterozygous CTC subset of CPP |
| chr7 | 135279315 | A | A,C | A,C | Heterozygous CTC subset of CPP |
| chr7 | 135292026 | C | C,T | C   | Heterozygous CTC subset of CPP |
| chr7 | 135292098 | G | A,G | G   | Heterozygous CTC subset of CPP |
| chr7 | 135303311 | A | A   | A   | Heterozygous CTC subset of CPP |
| chr7 | 135333172 | C | C,T | C   | Heterozygous CTC subset of CPP |
| chr7 | 138213903 | T | T   | T   | Heterozygous CTC subset of CPP |
| chr7 | 138252362 | T | T   | T   | Heterozygous CTC subset of CPP |
| chr7 | 139086903 | A | A,G | A   | Heterozygous CTC subset of CPP |
| chr7 | 140158851 | C | C,G | C   | Heterozygous CTC subset of CPP |
| chr7 | 140159529 | A | A   | A   | Heterozygous CTC subset of CPP |
| chr7 | 141450138 | C | C,T | C   | Heterozygous CTC subset of CPP |
| chr7 | 142989487 | G | G   | G   | Heterozygous CTC subset of CPP |
| chr7 | 143080026 | G | A,G | G   | Heterozygous CTC subset of CPP |
| chr7 | 148495112 | G | -G  | -G  | Heterozygous CTC subset of CPP |
| chr7 | 148525904 | C | C,G | C   | Heterozygous CTC subset of CPP |
| chr7 | 148892818 | A | A   | A   | Heterozygous CTC subset of CPP |
| chr7 | 148895536 | A | A   | A   | Heterozygous CTC subset of CPP |
| chr7 | 149576863 | G | G   | G   | Heterozygous CTC subset of CPP |
| chr7 | 150066008 | T | C,T | T   | Heterozygous CTC subset of CPP |
| chr7 | 150761680 | C | A,C | A,C | Heterozygous CTC subset of CPP |
| chr7 | 150763655 | T | A,T | T   | Heterozygous CTC subset of CPP |
| chr7 | 150765065 | T | C,T | C,T | Heterozygous CTC subset of CPP |
| chr7 | 150767432 | A | A   | A   | Heterozygous CTC subset of CPP |
| chr7 | 150767433 | G | G   | G   | Heterozygous CTC subset of CPP |
| chr7 | 150768786 | G | A,G | A,G | Heterozygous CTC subset of CPP |
| chr7 | 150773825 | G | G   | G   | Heterozygous CTC subset of CPP |
| chr7 | 150778714 | A | A   | A   | Heterozygous CTC subset of CPP |
| chr7 | 150912750 | G | G,T | G   | Heterozygous CTC subset of CPP |
| chr7 | 150912786 | T | C,T | T   | Heterozygous CTC subset of CPP |
| chr7 | 150916228 | G | A,G | A,G | Heterozygous CTC subset of CPP |
| chr7 | 150921950 | A | A,G | G   | Heterozygous CTC subset of CPP |
| chr7 | 150931268 | C | C,G | C,G | Heterozygous CTC subset of CPP |
| chr7 | 151181827 | C | C   | C   | Heterozygous CTC subset of CPP |
| chr7 | 155503920 | A | A,T | A,T | Heterozygous CTC subset of CPP |



Grillet et al., Supplementary Table 5

|      |           |   |       |   |                                |
|------|-----------|---|-------|---|--------------------------------|
| chr7 | 156518528 | G | G     | G | Heterozygous CTC subset of CPP |
| chr7 | 156520625 | C | C     | C | Heterozygous CTC subset of CPP |
| chr7 | 156554830 | T | C,T   | T | Heterozygous CTC subset of CPP |
| chr7 | 156798343 | G | G     | G | Heterozygous CTC subset of CPP |
| chr7 | 157000176 | T | C,T   | T | Heterozygous CTC subset of CPP |
| chr7 | 158526880 | G | A,G   | G | Heterozygous CTC subset of CPP |
| chr7 | 158528233 | A | A,G   | A | Heterozygous CTC subset of CPP |
| chr7 | 158534372 | G | A,G   | G | Heterozygous CTC subset of CPP |
| chr7 | 158534381 | G | C,G   | G | Heterozygous CTC subset of CPP |
| chr7 | 158536267 | T | C,T   | T | Heterozygous CTC subset of CPP |
| chr7 | 158536334 | G | A,G   | G | Heterozygous CTC subset of CPP |
| chr7 | 158536345 | A | A,G   | A | Heterozygous CTC subset of CPP |
| chr7 | 158566072 | A | A     | A | Heterozygous CTC subset of CPP |
| chr8 | 6588302   | A | A     | A | Heterozygous CTC subset of CPP |
| chr8 | 6588319   | T | T     | T | Heterozygous CTC subset of CPP |
| chr8 | 11660362  | T | C,T   | T | Heterozygous CTC subset of CPP |
| chr8 | 11667179  | C | C,T   | C | Heterozygous CTC subset of CPP |
| chr8 | 11695899  | T | G,T   | T | Heterozygous CTC subset of CPP |
| chr8 | 11706581  | T | C,T   | C | Heterozygous CTC subset of CPP |
| chr8 | 11706672  | G | G     | G | Heterozygous CTC subset of CPP |
| chr8 | 11708487  | A | +CT,A | A | Heterozygous CTC subset of CPP |
| chr8 | 11710888  | G | C,G   | G | Heterozygous CTC subset of CPP |
| chr8 | 17094742  | A | A     | A | Heterozygous CTC subset of CPP |
| chr8 | 17824565  | A | A     | A | Heterozygous CTC subset of CPP |
| chr8 | 17829880  | A | A     | A | Heterozygous CTC subset of CPP |
| chr8 | 17917106  | T | T     | T | Heterozygous CTC subset of CPP |
| chr8 | 17927327  | T | C,T   | T | Heterozygous CTC subset of CPP |
| chr8 | 17928811  | C | C,T   | C | Heterozygous CTC subset of CPP |
| chr8 | 19190491  | A | A,G   | A | Heterozygous CTC subset of CPP |
| chr8 | 19250975  | T | T     | T | Heterozygous CTC subset of CPP |
| chr8 | 19677915  | G | A,G   | G | Heterozygous CTC subset of CPP |
| chr8 | 20068717  | T | T     | T | Heterozygous CTC subset of CPP |
| chr8 | 21846586  | G | C,G   | C | Heterozygous CTC subset of CPP |
| chr8 | 21862551  | A | A,G   | G | Heterozygous CTC subset of CPP |
| chr8 | 21995979  | A | A     | A | Heterozygous CTC subset of CPP |
| chr8 | 21997501  | T | T     | T | Heterozygous CTC subset of CPP |
| chr8 | 22104777  | A | A     | A | Heterozygous CTC subset of CPP |
| chr8 | 22266009  | G | G     | G | Heterozygous CTC subset of CPP |
| chr8 | 22272353  | G | G     | G | Heterozygous CTC subset of CPP |
| chr8 | 22473224  | T | C,T   | T | Heterozygous CTC subset of CPP |
| chr8 | 22473281  | C | C,G   | C | Heterozygous CTC subset of CPP |
| chr8 | 22526559  | G | A,G   | G | Heterozygous CTC subset of CPP |
| chr8 | 22878959  | T | T     | T | Heterozygous CTC subset of CPP |
| chr8 | 22879734  | T | C,T   | T | Heterozygous CTC subset of CPP |
| chr8 | 22884800  | C | C     | C | Heterozygous CTC subset of CPP |
| chr8 | 22926313  | G | A,G   | A | Heterozygous CTC subset of CPP |

Grillet et al., Supplementary Table 5

|      |          |   |      |      |                                |
|------|----------|---|------|------|--------------------------------|
| chr8 | 22926498 | G | A,G  | G    | Heterozygous CTC subset of CPP |
| chr8 | 23423669 | A | A,G  | G    | Heterozygous CTC subset of CPP |
| chr8 | 26240637 | C | C    | C    | Heterozygous CTC subset of CPP |
| chr8 | 26435691 | C | C    | C    | Heterozygous CTC subset of CPP |
| chr8 | 26481822 | C | C    | C    | Heterozygous CTC subset of CPP |
| chr8 | 29961974 | T | T    | T    | Heterozygous CTC subset of CPP |
| chr8 | 30437862 | T | T    | T    | Heterozygous CTC subset of CPP |
| chr8 | 30648780 | T | T    | T    | Heterozygous CTC subset of CPP |
| chr8 | 37623237 | A | A    | A    | Heterozygous CTC subset of CPP |
| chr8 | 37720427 | C | C    | C    | Heterozygous CTC subset of CPP |
| chr8 | 37985900 | T | T    | T    | Heterozygous CTC subset of CPP |
| chr8 | 38029507 | A | A    | A    | Heterozygous CTC subset of CPP |
| chr8 | 38876436 | G | G    | G    | Heterozygous CTC subset of CPP |
| chr8 | 38884249 | T | T    | T    | Heterozygous CTC subset of CPP |
| chr8 | 38961268 | C | +T,C | +T,C | Heterozygous CTC subset of CPP |
| chr8 | 38961269 | T | T    | T    | Heterozygous CTC subset of CPP |
| chr8 | 41355096 | C | C,T  | C    | Heterozygous CTC subset of CPP |
| chr8 | 41476245 | T | T    | T    | Heterozygous CTC subset of CPP |
| chr8 | 41476436 | A | A    | A    | Heterozygous CTC subset of CPP |
| chr8 | 48614393 | T | T    | T    | Heterozygous CTC subset of CPP |
| chr8 | 48647931 | C | C    | C    | Heterozygous CTC subset of CPP |
| chr8 | 48730120 | T | T    | T    | Heterozygous CTC subset of CPP |
| chr8 | 48739380 | C | C    | C    | Heterozygous CTC subset of CPP |
| chr8 | 48752718 | A | A,G  | A    | Heterozygous CTC subset of CPP |
| chr8 | 48771449 | C | C    | C    | Heterozygous CTC subset of CPP |
| chr8 | 48855875 | A | A    | A    | Heterozygous CTC subset of CPP |
| chr8 | 48866391 | A | A    | A    | Heterozygous CTC subset of CPP |
| chr8 | 53537316 | A | A,G  | A    | Heterozygous CTC subset of CPP |
| chr8 | 53555069 | A | A,G  | A    | Heterozygous CTC subset of CPP |
| chr8 | 53569680 | C | C,T  | C    | Heterozygous CTC subset of CPP |
| chr8 | 53586494 | T | T    | T    | Heterozygous CTC subset of CPP |
| chr8 | 54656248 | A | A    | A    | Heterozygous CTC subset of CPP |
| chr8 | 54714404 | A | A    | A    | Heterozygous CTC subset of CPP |
| chr8 | 54965227 | A | A    | A    | Heterozygous CTC subset of CPP |
| chr8 | 56705265 | T | T    | T    | Heterozygous CTC subset of CPP |
| chr8 | 56985814 | T | C,T  | C,T  | Heterozygous CTC subset of CPP |
| chr8 | 57129989 | T | T    | T    | Heterozygous CTC subset of CPP |
| chr8 | 59493108 | T | T    | T    | Heterozygous CTC subset of CPP |
| chr8 | 61761147 | G | G    | G    | Heterozygous CTC subset of CPP |
| chr8 | 61761155 | T | T    | T    | Heterozygous CTC subset of CPP |
| chr8 | 61764780 | A | A    | A    | Heterozygous CTC subset of CPP |
| chr8 | 61764803 | A | A    | A    | Heterozygous CTC subset of CPP |
| chr8 | 62475412 | A | A    | A    | Heterozygous CTC subset of CPP |
| chr8 | 64099338 | A | A    | A    | Heterozygous CTC subset of CPP |
| chr8 | 64100067 | A | A    | A    | Heterozygous CTC subset of CPP |
| chr8 | 66525548 | T | C,T  | T    | Heterozygous CTC subset of CPP |

Grillet et al., Supplementary Table 5

|      |           |   |       |       |                                |
|------|-----------|---|-------|-------|--------------------------------|
| chr8 | 67971452  | T | C,T   | T     | Heterozygous CTC subset of CPP |
| chr8 | 74204953  | G | A,G   | G     | Heterozygous CTC subset of CPP |
| chr8 | 74888616  | G | C,G   | C,G   | Heterozygous CTC subset of CPP |
| chr8 | 74893821  | A | A,G   | A,G   | Heterozygous CTC subset of CPP |
| chr8 | 74893850  | C | C,G   | C,G   | Heterozygous CTC subset of CPP |
| chr8 | 80942294  | G | G,T   | G     | Heterozygous CTC subset of CPP |
| chr8 | 82670771  | G | G     | G     | Heterozygous CTC subset of CPP |
| chr8 | 86126836  | T | T     | T     | Heterozygous CTC subset of CPP |
| chr8 | 86127232  | A | A     | A     | Heterozygous CTC subset of CPP |
| chr8 | 90958422  | T | C,T   | C,T   | Heterozygous CTC subset of CPP |
| chr8 | 90958479  | C | C     | C     | Heterozygous CTC subset of CPP |
| chr8 | 90967570  | A | A     | A     | Heterozygous CTC subset of CPP |
| chr8 | 90967711  | A | A,G   | A,G   | Heterozygous CTC subset of CPP |
| chr8 | 90995019  | C | C,T   | C,T   | Heterozygous CTC subset of CPP |
| chr8 | 92083424  | A | A,G   | G     | Heterozygous CTC subset of CPP |
| chr8 | 95503930  | A | A     | A     | Heterozygous CTC subset of CPP |
| chr8 | 95539032  | T | T     | T     | Heterozygous CTC subset of CPP |
| chr8 | 95541302  | A | A,G   | A,G   | Heterozygous CTC subset of CPP |
| chr8 | 95541371  | T | A,T   | A     | Heterozygous CTC subset of CPP |
| chr8 | 95547119  | T | G,T   | G,T   | Heterozygous CTC subset of CPP |
| chr8 | 95854686  | A | A     | A     | Heterozygous CTC subset of CPP |
| chr8 | 95862171  | G | G     | G     | Heterozygous CTC subset of CPP |
| chr8 | 95877787  | T | C,T   | C     | Heterozygous CTC subset of CPP |
| chr8 | 95877796  | T | T     | T     | Heterozygous CTC subset of CPP |
| chr8 | 95879375  | T | T     | T     | Heterozygous CTC subset of CPP |
| chr8 | 95888307  | C | C,T   | T     | Heterozygous CTC subset of CPP |
| chr8 | 95888488  | T | T     | T     | Heterozygous CTC subset of CPP |
| chr8 | 97243166  | A | A     | A     | Heterozygous CTC subset of CPP |
| chr8 | 97243291  | T | T     | T     | Heterozygous CTC subset of CPP |
| chr8 | 97243292  | T | C,T   | C,T   | Heterozygous CTC subset of CPP |
| chr8 | 98788033  | G | C,G   | C     | Heterozygous CTC subset of CPP |
| chr8 | 98788261  | G | G,T   | G     | Heterozygous CTC subset of CPP |
| chr8 | 98828404  | A | A     | A     | Heterozygous CTC subset of CPP |
| chr8 | 99053984  | T | T     | T     | Heterozygous CTC subset of CPP |
| chr8 | 99053985  | T | A,G,T | A,G,T | Heterozygous CTC subset of CPP |
| chr8 | 99115082  | C | C,T   | C,T   | Heterozygous CTC subset of CPP |
| chr8 | 99115131  | C | C     | C     | Heterozygous CTC subset of CPP |
| chr8 | 100899793 | G | A,G   | G     | Heterozygous CTC subset of CPP |
| chr8 | 101719224 | T | T     | T     | Heterozygous CTC subset of CPP |
| chr8 | 101719226 | C | A     | A     | Heterozygous CTC subset of CPP |
| chr8 | 101719227 | T | T     | T     | Heterozygous CTC subset of CPP |
| chr8 | 101724593 | T | T     | T     | Heterozygous CTC subset of CPP |
| chr8 | 101730005 | T | T     | T     | Heterozygous CTC subset of CPP |
| chr8 | 101936193 | T | T     | T     | Heterozygous CTC subset of CPP |
| chr8 | 101936395 | A | A     | A     | Heterozygous CTC subset of CPP |
| chr8 | 101937219 | T | T     | T     | Heterozygous CTC subset of CPP |

Grillet et al., Supplementary Table 5

|      |           |   |      |      |                                |
|------|-----------|---|------|------|--------------------------------|
| chr8 | 102213890 | T | T    | T    | Heterozygous CTC subset of CPP |
| chr8 | 103662528 | A | A    | A    | Heterozygous CTC subset of CPP |
| chr8 | 103664250 | A | A    | A    | Heterozygous CTC subset of CPP |
| chr8 | 103851052 | T | C,T  | C,T  | Heterozygous CTC subset of CPP |
| chr8 | 104432545 | A | A,G  | A,G  | Heterozygous CTC subset of CPP |
| chr8 | 104442898 | A | A    | A    | Heterozygous CTC subset of CPP |
| chr8 | 109247328 | T | +A,T | +A,T | Heterozygous CTC subset of CPP |
| chr8 | 109248390 | A | A    | A    | Heterozygous CTC subset of CPP |
| chr8 | 119122924 | T | T    | T    | Heterozygous CTC subset of CPP |
| chr8 | 119123279 | C | C    | C    | Heterozygous CTC subset of CPP |
| chr8 | 120744349 | T | C,T  | T    | Heterozygous CTC subset of CPP |
| chr8 | 120744399 | C | C,T  | C    | Heterozygous CTC subset of CPP |
| chr8 | 120793296 | C | C,T  | C,T  | Heterozygous CTC subset of CPP |
| chr8 | 120818567 | T | T    | T    | Heterozygous CTC subset of CPP |
| chr8 | 120831639 | A | A    | A    | Heterozygous CTC subset of CPP |
| chr8 | 120844782 | G | A,G  | A,G  | Heterozygous CTC subset of CPP |
| chr8 | 120844846 | G | C,G  | G    | Heterozygous CTC subset of CPP |
| chr8 | 120847123 | C | C,T  | T    | Heterozygous CTC subset of CPP |
| chr8 | 120847141 | T | T    | T    | Heterozygous CTC subset of CPP |
| chr8 | 120862715 | A | A    | A    | Heterozygous CTC subset of CPP |
| chr8 | 124031541 | T | C,T  | T    | Heterozygous CTC subset of CPP |
| chr8 | 124243760 | T | T    | T    | Heterozygous CTC subset of CPP |
| chr8 | 124250113 | A | A    | A    | Heterozygous CTC subset of CPP |
| chr8 | 124265587 | T | T    | T    | Heterozygous CTC subset of CPP |
| chr8 | 124333313 | A | A    | A    | Heterozygous CTC subset of CPP |
| chr8 | 124338244 | A | A    | A    | Heterozygous CTC subset of CPP |
| chr8 | 124358444 | T | T    | T    | Heterozygous CTC subset of CPP |
| chr8 | 126114629 | T | T    | T    | Heterozygous CTC subset of CPP |
| chr8 | 126114631 | T | T    | T    | Heterozygous CTC subset of CPP |
| chr8 | 128750540 | A | A,G  | A    | Heterozygous CTC subset of CPP |
| chr8 | 133806730 | G | A,G  | G    | Heterozygous CTC subset of CPP |
| chr8 | 133823318 | T | T    | T    | Heterozygous CTC subset of CPP |
| chr8 | 134271472 | A | +C,A | A    | Heterozygous CTC subset of CPP |
| chr8 | 141568622 | G | A,G  | A    | Heterozygous CTC subset of CPP |
| chr8 | 141753394 | T | G,T  | T    | Heterozygous CTC subset of CPP |
| chr8 | 143808951 | C | C,T  | T    | Heterozygous CTC subset of CPP |
| chr8 | 144392368 | G | A,G  | A,G  | Heterozygous CTC subset of CPP |
| chr8 | 144403485 | G | C,G  | G    | Heterozygous CTC subset of CPP |
| chr8 | 144406705 | C | C,T  | C    | Heterozygous CTC subset of CPP |
| chr8 | 144464606 | G | G    | G    | Heterozygous CTC subset of CPP |
| chr8 | 144652812 | C | C    | C    | Heterozygous CTC subset of CPP |
| chr8 | 144659493 | G | G    | G    | Heterozygous CTC subset of CPP |
| chr8 | 144669019 | T | T    | T    | Heterozygous CTC subset of CPP |
| chr8 | 144669020 | C | C    | C    | Heterozygous CTC subset of CPP |
| chr8 | 144669021 | T | T    | T    | Heterozygous CTC subset of CPP |
| chr8 | 144808167 | G | G    | G    | Heterozygous CTC subset of CPP |

Grillet et al., Supplementary Table 5

|      |           |   |     |     |                                |
|------|-----------|---|-----|-----|--------------------------------|
| chr8 | 144890899 | T | T   | T   | Heterozygous CTC subset of CPP |
| chr8 | 144897515 | A | A   | A   | Heterozygous CTC subset of CPP |
| chr8 | 144990784 | G | A,G | G   | Heterozygous CTC subset of CPP |
| chr8 | 144992950 | T | T   | T   | Heterozygous CTC subset of CPP |
| chr8 | 145004597 | C | C   | C   | Heterozygous CTC subset of CPP |
| chr8 | 145006372 | T | T   | T   | Heterozygous CTC subset of CPP |
| chr8 | 145007187 | G | G   | G   | Heterozygous CTC subset of CPP |
| chr8 | 145008829 | A | A   | A   | Heterozygous CTC subset of CPP |
| chr8 | 145011204 | A | A   | A   | Heterozygous CTC subset of CPP |
| chr8 | 145133610 | G | G   | G   | Heterozygous CTC subset of CPP |
| chr8 | 145134899 | A | A,G | A   | Heterozygous CTC subset of CPP |
| chr8 | 145137619 | C | C   | C   | Heterozygous CTC subset of CPP |
| chr8 | 145139727 | C | C,T | C   | Heterozygous CTC subset of CPP |
| chr8 | 145140564 | G | A,G | G   | Heterozygous CTC subset of CPP |
| chr8 | 145150101 | T | G,T | G   | Heterozygous CTC subset of CPP |
| chr8 | 145154222 | G | A,G | G   | Heterozygous CTC subset of CPP |
| chr8 | 145158503 | G | G,T | T   | Heterozygous CTC subset of CPP |
| chr8 | 145161823 | G | A,G | A   | Heterozygous CTC subset of CPP |
| chr8 | 145535875 | T | T   | T   | Heterozygous CTC subset of CPP |
| chr8 | 145535883 | G | G   | G   | Heterozygous CTC subset of CPP |
| chr8 | 145541766 | G | G,T | G   | Heterozygous CTC subset of CPP |
| chr8 | 145542021 | G | A,G | G   | Heterozygous CTC subset of CPP |
| chr8 | 145542713 | A | A   | A   | Heterozygous CTC subset of CPP |
| chr8 | 145580324 | T | T   | T   | Heterozygous CTC subset of CPP |
| chr8 | 145580535 | C | C   | C   | Heterozygous CTC subset of CPP |
| chr8 | 145621714 | A | A   | A   | Heterozygous CTC subset of CPP |
| chr8 | 145638272 | G | A,G | G   | Heterozygous CTC subset of CPP |
| chr8 | 145650427 | C | C,T | C   | Heterozygous CTC subset of CPP |
| chr8 | 145663894 | A | A   | A   | Heterozygous CTC subset of CPP |
| chr8 | 145665407 | C | C,T | C,T | Heterozygous CTC subset of CPP |
| chr8 | 145735813 | A | A   | A   | Heterozygous CTC subset of CPP |
| chr8 | 145736459 | T | T   | T   | Heterozygous CTC subset of CPP |
| chr8 | 145736460 | G | G   | G   | Heterozygous CTC subset of CPP |
| chr8 | 145737816 | C | C,T | C   | Heterozygous CTC subset of CPP |
| chr8 | 145739640 | A | A   | A   | Heterozygous CTC subset of CPP |
| chr8 | 145740343 | G | G   | G   | Heterozygous CTC subset of CPP |
| chr8 | 145741702 | C | C,G | C   | Heterozygous CTC subset of CPP |
| chr8 | 145741765 | G | A,G | G   | Heterozygous CTC subset of CPP |
| chr8 | 145749844 | A | A   | A   | Heterozygous CTC subset of CPP |
| chr9 | 2811505   | G | A,G | G   | Heterozygous CTC subset of CPP |
| chr9 | 2811566   | A | A   | A   | Heterozygous CTC subset of CPP |
| chr9 | 2828765   | C | C,G | C   | Heterozygous CTC subset of CPP |
| chr9 | 4834149   | A | A   | A   | Heterozygous CTC subset of CPP |
| chr9 | 5801214   | T | T   | T   | Heterozygous CTC subset of CPP |
| chr9 | 5810231   | G | G   | G   | Heterozygous CTC subset of CPP |
| chr9 | 5830878   | C | C   | C   | Heterozygous CTC subset of CPP |

Grillet et al., Supplementary Table 5

|      |          |   |     |     |                                |
|------|----------|---|-----|-----|--------------------------------|
| chr9 | 5832728  | G | C,G | G   | Heterozygous CTC subset of CPP |
| chr9 | 6497256  | A | A   | A   | Heterozygous CTC subset of CPP |
| chr9 | 7799606  | C | A,C | C   | Heterozygous CTC subset of CPP |
| chr9 | 7799653  | G | G,T | G   | Heterozygous CTC subset of CPP |
| chr9 | 15447191 | T | G,T | T   | Heterozygous CTC subset of CPP |
| chr9 | 19379482 | T | C,T | T   | Heterozygous CTC subset of CPP |
| chr9 | 20413956 | T | C,T | T   | Heterozygous CTC subset of CPP |
| chr9 | 20413958 | T | T   | T   | Heterozygous CTC subset of CPP |
| chr9 | 21816758 | G | A,G | G   | Heterozygous CTC subset of CPP |
| chr9 | 21818110 | T | T   | T   | Heterozygous CTC subset of CPP |
| chr9 | 26905777 | A | A   | A   | Heterozygous CTC subset of CPP |
| chr9 | 26905972 | T | T   | T   | Heterozygous CTC subset of CPP |
| chr9 | 26910378 | C | C   | C   | Heterozygous CTC subset of CPP |
| chr9 | 26919489 | A | A   | A   | Heterozygous CTC subset of CPP |
| chr9 | 32570995 | A | A   | A   | Heterozygous CTC subset of CPP |
| chr9 | 32987667 | T | T   | T   | Heterozygous CTC subset of CPP |
| chr9 | 33026572 | T | C,T | C,T | Heterozygous CTC subset of CPP |
| chr9 | 33056148 | T | T   | T   | Heterozygous CTC subset of CPP |
| chr9 | 33462147 | C | C   | C   | Heterozygous CTC subset of CPP |
| chr9 | 33464073 | T | T   | T   | Heterozygous CTC subset of CPP |
| chr9 | 33464966 | T | T   | T   | Heterozygous CTC subset of CPP |
| chr9 | 33467179 | A | A   | A   | Heterozygous CTC subset of CPP |
| chr9 | 33468087 | C | C,T | C   | Heterozygous CTC subset of CPP |
| chr9 | 33469664 | T | T   | T   | Heterozygous CTC subset of CPP |
| chr9 | 33625023 | A | A   | A   | Heterozygous CTC subset of CPP |
| chr9 | 33625272 | T | T   | T   | Heterozygous CTC subset of CPP |
| chr9 | 33625274 | T | T   | T   | Heterozygous CTC subset of CPP |
| chr9 | 33798619 | A | A   | A   | Heterozygous CTC subset of CPP |
| chr9 | 33798620 | G | G   | G   | Heterozygous CTC subset of CPP |
| chr9 | 33933607 | A | A   | A   | Heterozygous CTC subset of CPP |
| chr9 | 33941759 | T | C,T | T   | Heterozygous CTC subset of CPP |
| chr9 | 33971740 | A | A,G | A,G | Heterozygous CTC subset of CPP |
| chr9 | 34017106 | C | C,T | T   | Heterozygous CTC subset of CPP |
| chr9 | 34107505 | C | C,T | C   | Heterozygous CTC subset of CPP |
| chr9 | 34234290 | T | T   | T   | Heterozygous CTC subset of CPP |
| chr9 | 34234338 | G | G   | G   | Heterozygous CTC subset of CPP |
| chr9 | 34635716 | G | A,G | G   | Heterozygous CTC subset of CPP |
| chr9 | 35095219 | G | A,G | G   | Heterozygous CTC subset of CPP |
| chr9 | 35657962 | G | A,G | G   | Heterozygous CTC subset of CPP |
| chr9 | 35657981 | T | C,T | T   | Heterozygous CTC subset of CPP |
| chr9 | 35699124 | T | T   | T   | Heterozygous CTC subset of CPP |
| chr9 | 35705759 | G | G   | G   | Heterozygous CTC subset of CPP |
| chr9 | 35707483 | C | C,T | C   | Heterozygous CTC subset of CPP |
| chr9 | 35708440 | A | A   | A   | Heterozygous CTC subset of CPP |
| chr9 | 35724625 | A | A   | A   | Heterozygous CTC subset of CPP |
| chr9 | 35738629 | C | C   | C   | Heterozygous CTC subset of CPP |

Grillet et al., Supplementary Table 5

|      |          |   |     |     |                                |
|------|----------|---|-----|-----|--------------------------------|
| chr9 | 35740625 | C | C   | C   | Heterozygous CTC subset of CPP |
| chr9 | 35741800 | A | A   | A   | Heterozygous CTC subset of CPP |
| chr9 | 35749845 | G | C,G | G   | Heterozygous CTC subset of CPP |
| chr9 | 35749864 | T | T   | T   | Heterozygous CTC subset of CPP |
| chr9 | 35753691 | A | A   | A   | Heterozygous CTC subset of CPP |
| chr9 | 35754034 | G | G   | G   | Heterozygous CTC subset of CPP |
| chr9 | 35754035 | T | T   | T   | Heterozygous CTC subset of CPP |
| chr9 | 37436783 | A | A   | A   | Heterozygous CTC subset of CPP |
| chr9 | 37493588 | C | C,T | C   | Heterozygous CTC subset of CPP |
| chr9 | 37500895 | T | C,T | T   | Heterozygous CTC subset of CPP |
| chr9 | 37592452 | G | A,G | G   | Heterozygous CTC subset of CPP |
| chr9 | 37948724 | T | C,T | T   | Heterozygous CTC subset of CPP |
| chr9 | 38396065 | G | G,T | G,T | Heterozygous CTC subset of CPP |
| chr9 | 38396502 | G | A   | A   | Heterozygous CTC subset of CPP |
| chr9 | 71668116 | G | G   | G   | Heterozygous CTC subset of CPP |
| chr9 | 71687718 | C | C   | C   | Heterozygous CTC subset of CPP |
| chr9 | 71841068 | A | A   | A   | Heterozygous CTC subset of CPP |
| chr9 | 71842963 | A | A   | A   | Heterozygous CTC subset of CPP |
| chr9 | 71843023 | C | A,C | A   | Heterozygous CTC subset of CPP |
| chr9 | 71845012 | T | T   | T   | Heterozygous CTC subset of CPP |
| chr9 | 71851877 | G | A,G | A,G | Heterozygous CTC subset of CPP |
| chr9 | 71861685 | G | G   | G   | Heterozygous CTC subset of CPP |
| chr9 | 71862975 | C | C   | C   | Heterozygous CTC subset of CPP |
| chr9 | 71863038 | C | C,T | C   | Heterozygous CTC subset of CPP |
| chr9 | 74349846 | A | A,T | A   | Heterozygous CTC subset of CPP |
| chr9 | 74354983 | A | A,G | A   | Heterozygous CTC subset of CPP |
| chr9 | 74355028 | A | A,G | A   | Heterozygous CTC subset of CPP |
| chr9 | 74365116 | T | T   | T   | Heterozygous CTC subset of CPP |
| chr9 | 74971898 | T | T   | T   | Heterozygous CTC subset of CPP |
| chr9 | 75524613 | T | T   | T   | Heterozygous CTC subset of CPP |
| chr9 | 77752510 | C | C,T | C   | Heterozygous CTC subset of CPP |
| chr9 | 77761642 | T | C,T | T   | Heterozygous CTC subset of CPP |
| chr9 | 79986057 | A | A,G | A,G | Heterozygous CTC subset of CPP |
| chr9 | 80430664 | T | T   | T   | Heterozygous CTC subset of CPP |
| chr9 | 80912115 | G | C,G | C   | Heterozygous CTC subset of CPP |
| chr9 | 80919756 | T | G,T | G   | Heterozygous CTC subset of CPP |
| chr9 | 80919807 | G | A,G | G   | Heterozygous CTC subset of CPP |
| chr9 | 80943035 | A | A   | A   | Heterozygous CTC subset of CPP |
| chr9 | 86278817 | C | A,C | C   | Heterozygous CTC subset of CPP |
| chr9 | 86284178 | C | A,C | A,C | Heterozygous CTC subset of CPP |
| chr9 | 86571136 | T | T   | T   | Heterozygous CTC subset of CPP |
| chr9 | 86585244 | C | C   | C   | Heterozygous CTC subset of CPP |
| chr9 | 86585655 | T | T   | T   | Heterozygous CTC subset of CPP |
| chr9 | 86588885 | G | G   | G   | Heterozygous CTC subset of CPP |
| chr9 | 88574733 | T | T   | T   | Heterozygous CTC subset of CPP |
| chr9 | 88622369 | C | C   | C   | Heterozygous CTC subset of CPP |

Grillet et al., Supplementary Table 5

|      |           |   |     |     |                                |
|------|-----------|---|-----|-----|--------------------------------|
| chr9 | 88636887  | G | A,G | G   | Heterozygous CTC subset of CPP |
| chr9 | 88650378  | G | A,G | G   | Heterozygous CTC subset of CPP |
| chr9 | 91077493  | T | T   | T   | Heterozygous CTC subset of CPP |
| chr9 | 91931354  | A | A   | A   | Heterozygous CTC subset of CPP |
| chr9 | 91965712  | C | C   | C   | Heterozygous CTC subset of CPP |
| chr9 | 94172690  | T | T   | T   | Heterozygous CTC subset of CPP |
| chr9 | 94794623  | T | C,T | T   | Heterozygous CTC subset of CPP |
| chr9 | 94985637  | T | C,T | T   | Heterozygous CTC subset of CPP |
| chr9 | 95005537  | A | A,C | A   | Heterozygous CTC subset of CPP |
| chr9 | 95030569  | C | C,G | C   | Heterozygous CTC subset of CPP |
| chr9 | 95063947  | C | C,T | C   | Heterozygous CTC subset of CPP |
| chr9 | 95481679  | A | A   | A   | Heterozygous CTC subset of CPP |
| chr9 | 95858578  | C | C   | C   | Heterozygous CTC subset of CPP |
| chr9 | 95872885  | C | C,T | C,T | Heterozygous CTC subset of CPP |
| chr9 | 95887320  | G | G,T | T   | Heterozygous CTC subset of CPP |
| chr9 | 96209943  | T | C,T | T   | Heterozygous CTC subset of CPP |
| chr9 | 96212813  | C | C,T | C,T | Heterozygous CTC subset of CPP |
| chr9 | 96213399  | T | T   | T   | Heterozygous CTC subset of CPP |
| chr9 | 96238578  | C | C,T | C,T | Heterozygous CTC subset of CPP |
| chr9 | 96291861  | A | A   | A   | Heterozygous CTC subset of CPP |
| chr9 | 96429439  | G | G   | G   | Heterozygous CTC subset of CPP |
| chr9 | 96436037  | G | A,G | G   | Heterozygous CTC subset of CPP |
| chr9 | 97221463  | G | A,G | G   | Heterozygous CTC subset of CPP |
| chr9 | 100410464 | A | A   | A   | Heterozygous CTC subset of CPP |
| chr9 | 100423255 | T | T   | T   | Heterozygous CTC subset of CPP |
| chr9 | 100757050 | T | T   | T   | Heterozygous CTC subset of CPP |
| chr9 | 100819070 | T | G,T | G,T | Heterozygous CTC subset of CPP |
| chr9 | 100823084 | T | C,T | C,T | Heterozygous CTC subset of CPP |
| chr9 | 100823135 | G | C,G | G   | Heterozygous CTC subset of CPP |
| chr9 | 100845320 | A | A   | A   | Heterozygous CTC subset of CPP |
| chr9 | 100854281 | T | T   | T   | Heterozygous CTC subset of CPP |
| chr9 | 101558444 | G | A,G | G   | Heterozygous CTC subset of CPP |
| chr9 | 101558609 | G | A,G | G   | Heterozygous CTC subset of CPP |
| chr9 | 101990271 | T | T   | T   | Heterozygous CTC subset of CPP |
| chr9 | 102814790 | A | A   | A   | Heterozygous CTC subset of CPP |
| chr9 | 103082663 | A | A   | A   | Heterozygous CTC subset of CPP |
| chr9 | 103111523 | A | A   | A   | Heterozygous CTC subset of CPP |
| chr9 | 103204577 | C | C,G | C   | Heterozygous CTC subset of CPP |
| chr9 | 104152846 | G | A,G | G   | Heterozygous CTC subset of CPP |
| chr9 | 104314843 | A | A   | A   | Heterozygous CTC subset of CPP |
| chr9 | 104314858 | A | A   | A   | Heterozygous CTC subset of CPP |
| chr9 | 106857688 | T | T   | T   | Heterozygous CTC subset of CPP |
| chr9 | 106889571 | C | C,T | C   | Heterozygous CTC subset of CPP |
| chr9 | 106896809 | G | A,G | A   | Heterozygous CTC subset of CPP |
| chr9 | 110084328 | C | C,T | C   | Heterozygous CTC subset of CPP |
| chr9 | 110091832 | A | A   | A   | Heterozygous CTC subset of CPP |



Grillet et al., Supplementary Table 5

|      |           |   |     |     |                                |
|------|-----------|---|-----|-----|--------------------------------|
| chr9 | 111653574 | C | C,G | C   | Heterozygous CTC subset of CPP |
| chr9 | 111668652 | C | C,T | C   | Heterozygous CTC subset of CPP |
| chr9 | 111689680 | A | A   | A   | Heterozygous CTC subset of CPP |
| chr9 | 111705043 | A | A   | A   | Heterozygous CTC subset of CPP |
| chr9 | 111727670 | C | C,G | C   | Heterozygous CTC subset of CPP |
| chr9 | 111795607 | T | T   | T   | Heterozygous CTC subset of CPP |
| chr9 | 111819538 | A | A   | A   | Heterozygous CTC subset of CPP |
| chr9 | 111882167 | G | C,G | G   | Heterozygous CTC subset of CPP |
| chr9 | 113006420 | A | A,G | A,G | Heterozygous CTC subset of CPP |
| chr9 | 113007062 | T | T   | T   | Heterozygous CTC subset of CPP |
| chr9 | 113007063 | G | G   | G   | Heterozygous CTC subset of CPP |
| chr9 | 114982463 | T | C,T | T   | Heterozygous CTC subset of CPP |
| chr9 | 114982549 | C | C,T | C   | Heterozygous CTC subset of CPP |
| chr9 | 114986263 | C | C   | C   | Heterozygous CTC subset of CPP |
| chr9 | 116019395 | T | T   | T   | Heterozygous CTC subset of CPP |
| chr9 | 116022655 | T | T   | T   | Heterozygous CTC subset of CPP |
| chr9 | 116044998 | A | A,G | A   | Heterozygous CTC subset of CPP |
| chr9 | 116136155 | G | G   | G   | Heterozygous CTC subset of CPP |
| chr9 | 116136198 | C | C,T | C,T | Heterozygous CTC subset of CPP |
| chr9 | 123170733 | C | C,G | C,G | Heterozygous CTC subset of CPP |
| chr9 | 123220850 | G | A,G | G   | Heterozygous CTC subset of CPP |
| chr9 | 123538378 | A | A   | A   | Heterozygous CTC subset of CPP |
| chr9 | 123583192 | A | A,G | A,G | Heterozygous CTC subset of CPP |
| chr9 | 124089692 | C | C   | C   | Heterozygous CTC subset of CPP |
| chr9 | 124914613 | C | C,T | C,T | Heterozygous CTC subset of CPP |
| chr9 | 125033331 | A | A   | A   | Heterozygous CTC subset of CPP |
| chr9 | 125582612 | A | A   | A   | Heterozygous CTC subset of CPP |
| chr9 | 125827677 | A | A   | A   | Heterozygous CTC subset of CPP |
| chr9 | 125898745 | A | A   | A   | Heterozygous CTC subset of CPP |
| chr9 | 125920376 | G | A,G | A,G | Heterozygous CTC subset of CPP |
| chr9 | 126429316 | T | T   | T   | Heterozygous CTC subset of CPP |
| chr9 | 127088697 | C | C   | C   | Heterozygous CTC subset of CPP |
| chr9 | 127101897 | T | T   | T   | Heterozygous CTC subset of CPP |
| chr9 | 127177161 | A | A,G | A   | Heterozygous CTC subset of CPP |
| chr9 | 127622472 | T | C,T | C,T | Heterozygous CTC subset of CPP |
| chr9 | 127982852 | C | C   | C   | Heterozygous CTC subset of CPP |
| chr9 | 127999360 | A | A   | A   | Heterozygous CTC subset of CPP |
| chr9 | 128099659 | A | A   | A   | Heterozygous CTC subset of CPP |
| chr9 | 128109204 | A | A   | A   | Heterozygous CTC subset of CPP |
| chr9 | 128122832 | C | C   | C   | Heterozygous CTC subset of CPP |
| chr9 | 128201222 | G | A,G | G   | Heterozygous CTC subset of CPP |
| chr9 | 128246786 | G | A,G | A,G | Heterozygous CTC subset of CPP |
| chr9 | 130413883 | G | G   | G   | Heterozygous CTC subset of CPP |
| chr9 | 130698029 | G | C,G | C   | Heterozygous CTC subset of CPP |
| chr9 | 130698043 | A | A,G | G   | Heterozygous CTC subset of CPP |
| chr9 | 130938639 | G | A,G | G   | Heterozygous CTC subset of CPP |

Grillet et al., Supplementary Table 5

|      |           |   |     |     |                                |
|------|-----------|---|-----|-----|--------------------------------|
| chr9 | 131017003 | T | T   | T   | Heterozygous CTC subset of CPP |
| chr9 | 131019389 | T | T   | T   | Heterozygous CTC subset of CPP |
| chr9 | 131019738 | T | C,T | T   | Heterozygous CTC subset of CPP |
| chr9 | 131023505 | T | C,T | T   | Heterozygous CTC subset of CPP |
| chr9 | 131036174 | A | A   | A   | Heterozygous CTC subset of CPP |
| chr9 | 131073182 | A | A   | A   | Heterozygous CTC subset of CPP |
| chr9 | 131085196 | G | G   | G   | Heterozygous CTC subset of CPP |
| chr9 | 131085412 | A | A   | A   | Heterozygous CTC subset of CPP |
| chr9 | 131088076 | G | A,G | G   | Heterozygous CTC subset of CPP |
| chr9 | 131094472 | A | A   | A   | Heterozygous CTC subset of CPP |
| chr9 | 131110892 | G | A,G | G   | Heterozygous CTC subset of CPP |
| chr9 | 131151587 | T | T   | T   | Heterozygous CTC subset of CPP |
| chr9 | 131235956 | T | T   | T   | Heterozygous CTC subset of CPP |
| chr9 | 131243875 | T | T   | T   | Heterozygous CTC subset of CPP |
| chr9 | 131339143 | T | T   | T   | Heterozygous CTC subset of CPP |
| chr9 | 131341963 | T | T   | T   | Heterozygous CTC subset of CPP |
| chr9 | 131347007 | T | T   | T   | Heterozygous CTC subset of CPP |
| chr9 | 131360750 | C | C,T | C,T | Heterozygous CTC subset of CPP |
| chr9 | 131362361 | T | C,T | T   | Heterozygous CTC subset of CPP |
| chr9 | 131370268 | A | A   | A   | Heterozygous CTC subset of CPP |
| chr9 | 131379967 | C | C,T | C,T | Heterozygous CTC subset of CPP |
| chr9 | 131397191 | C | C,T | C   | Heterozygous CTC subset of CPP |
| chr9 | 131397479 | G | A,G | A,G | Heterozygous CTC subset of CPP |
| chr9 | 131398633 | C | C,T | C   | Heterozygous CTC subset of CPP |
| chr9 | 131398636 | C | C,T | C,T | Heterozygous CTC subset of CPP |
| chr9 | 131403096 | A | A,G | A,G | Heterozygous CTC subset of CPP |
| chr9 | 131453505 | A | A   | A   | Heterozygous CTC subset of CPP |
| chr9 | 131456936 | A | A   | A   | Heterozygous CTC subset of CPP |
| chr9 | 131483551 | T | A,T | T   | Heterozygous CTC subset of CPP |
| chr9 | 131584631 | C | C,T | C   | Heterozygous CTC subset of CPP |
| chr9 | 131588888 | G | C,G | G   | Heterozygous CTC subset of CPP |
| chr9 | 131591119 | A | A   | A   | Heterozygous CTC subset of CPP |
| chr9 | 131669498 | A | A   | A   | Heterozygous CTC subset of CPP |
| chr9 | 131669776 | T | T   | T   | Heterozygous CTC subset of CPP |
| chr9 | 131670001 | C | C   | C   | Heterozygous CTC subset of CPP |
| chr9 | 131670546 | T | T   | T   | Heterozygous CTC subset of CPP |
| chr9 | 131671115 | C | C   | C   | Heterozygous CTC subset of CPP |
| chr9 | 131735511 | A | A   | A   | Heterozygous CTC subset of CPP |
| chr9 | 131742967 | T | T   | T   | Heterozygous CTC subset of CPP |
| chr9 | 131752460 | T | T   | T   | Heterozygous CTC subset of CPP |
| chr9 | 131756663 | G | G   | G   | Heterozygous CTC subset of CPP |
| chr9 | 131767668 | A | A,C | A,C | Heterozygous CTC subset of CPP |
| chr9 | 131771508 | A | A   | A   | Heterozygous CTC subset of CPP |
| chr9 | 131774577 | T | T   | T   | Heterozygous CTC subset of CPP |
| chr9 | 131939297 | G | G   | G   | Heterozygous CTC subset of CPP |
| chr9 | 132580901 | C | C,G | C   | Heterozygous CTC subset of CPP |

Grillet et al., Supplementary Table 5

|      |           |   |      |     |                                |
|------|-----------|---|------|-----|--------------------------------|
| chr9 | 133470975 | G | G    | G   | Heterozygous CTC subset of CPP |
| chr9 | 133506019 | T | T    | T   | Heterozygous CTC subset of CPP |
| chr9 | 133511390 | C | C,T  | C   | Heterozygous CTC subset of CPP |
| chr9 | 133759802 | T | T    | T   | Heterozygous CTC subset of CPP |
| chr9 | 133760029 | C | C,G  | C   | Heterozygous CTC subset of CPP |
| chr9 | 133760252 | T | T    | T   | Heterozygous CTC subset of CPP |
| chr9 | 133761001 | A | A,G  | A   | Heterozygous CTC subset of CPP |
| chr9 | 134021642 | A | A    | A   | Heterozygous CTC subset of CPP |
| chr9 | 134073308 | T | T    | T   | Heterozygous CTC subset of CPP |
| chr9 | 134308126 | G | A,G  | G   | Heterozygous CTC subset of CPP |
| chr9 | 134314423 | T | C,T  | T   | Heterozygous CTC subset of CPP |
| chr9 | 134321941 | G | A,G  | G   | Heterozygous CTC subset of CPP |
| chr9 | 134350323 | C | G    | G   | Heterozygous CTC subset of CPP |
| chr9 | 134350973 | T | T    | T   | Heterozygous CTC subset of CPP |
| chr9 | 134360371 | A | A    | A   | Heterozygous CTC subset of CPP |
| chr9 | 135470304 | T | T    | T   | Heterozygous CTC subset of CPP |
| chr9 | 135470385 | A | A    | A   | Heterozygous CTC subset of CPP |
| chr9 | 135470414 | T | C,T  | C,T | Heterozygous CTC subset of CPP |
| chr9 | 135546255 | G | A,G  | G   | Heterozygous CTC subset of CPP |
| chr9 | 135554520 | A | A,G  | A   | Heterozygous CTC subset of CPP |
| chr9 | 135554535 | T | T    | T   | Heterozygous CTC subset of CPP |
| chr9 | 135933273 | A | A    | A   | Heterozygous CTC subset of CPP |
| chr9 | 135933276 | A | A    | A   | Heterozygous CTC subset of CPP |
| chr9 | 135973961 | T | T    | T   | Heterozygous CTC subset of CPP |
| chr9 | 135974100 | G | A,G  | A,G | Heterozygous CTC subset of CPP |
| chr9 | 135974148 | C | +T,C | C   | Heterozygous CTC subset of CPP |
| chr9 | 135977366 | T | G,T  | T   | Heterozygous CTC subset of CPP |
| chr9 | 135982134 | T | T    | T   | Heterozygous CTC subset of CPP |
| chr9 | 136217176 | T | T    | T   | Heterozygous CTC subset of CPP |
| chr9 | 136218189 | A | A    | A   | Heterozygous CTC subset of CPP |
| chr9 | 136218218 | T | T    | T   | Heterozygous CTC subset of CPP |
| chr9 | 136276133 | A | A    | A   | Heterozygous CTC subset of CPP |
| chr9 | 136276192 | T | T    | T   | Heterozygous CTC subset of CPP |
| chr9 | 136913355 | T | C,T  | C   | Heterozygous CTC subset of CPP |
| chr9 | 136913541 | A | A    | A   | Heterozygous CTC subset of CPP |
| chr9 | 136915502 | G | A,G  | G   | Heterozygous CTC subset of CPP |
| chr9 | 136915508 | C | C,T  | C   | Heterozygous CTC subset of CPP |
| chr9 | 136915695 | G | A,G  | G   | Heterozygous CTC subset of CPP |
| chr9 | 136916812 | A | A    | A   | Heterozygous CTC subset of CPP |
| chr9 | 136918529 | G | -G,G | G   | Heterozygous CTC subset of CPP |
| chr9 | 137005023 | C | C,T  | T   | Heterozygous CTC subset of CPP |
| chr9 | 138706951 | T | T    | T   | Heterozygous CTC subset of CPP |
| chr9 | 138831567 | T | C,T  | T   | Heterozygous CTC subset of CPP |
| chr9 | 139008803 | T | G,T  | G   | Heterozygous CTC subset of CPP |
| chr9 | 139100805 | T | C,T  | T   | Heterozygous CTC subset of CPP |
| chr9 | 139107149 | A | A    | A   | Heterozygous CTC subset of CPP |

Grillet et al., Supplementary Table 5

|      |           |   |     |     |                                |
|------|-----------|---|-----|-----|--------------------------------|
| chr9 | 139110654 | C | C   | C   | Heterozygous CTC subset of CPP |
| chr9 | 139137626 | C | C,T | C   | Heterozygous CTC subset of CPP |
| chr9 | 139305115 | C | C   | C   | Heterozygous CTC subset of CPP |
| chr9 | 139307015 | A | A   | A   | Heterozygous CTC subset of CPP |
| chr9 | 139338309 | G | G   | G   | Heterozygous CTC subset of CPP |
| chr9 | 139368782 | A | A   | A   | Heterozygous CTC subset of CPP |
| chr9 | 139369446 | A | A   | A   | Heterozygous CTC subset of CPP |
| chr9 | 139370217 | G | G   | G   | Heterozygous CTC subset of CPP |
| chr9 | 139371234 | G | G   | G   | Heterozygous CTC subset of CPP |
| chr9 | 139395217 | C | C   | C   | Heterozygous CTC subset of CPP |
| chr9 | 139399281 | C | C   | C   | Heterozygous CTC subset of CPP |
| chr9 | 139399482 | C | C   | C   | Heterozygous CTC subset of CPP |
| chr9 | 139407937 | T | T   | T   | Heterozygous CTC subset of CPP |
| chr9 | 139581758 | C | C   | C   | Heterozygous CTC subset of CPP |
| chr9 | 139731969 | C | C,T | T   | Heterozygous CTC subset of CPP |
| chr9 | 139732331 | G | C,G | C   | Heterozygous CTC subset of CPP |
| chr9 | 139732462 | C | C,T | C   | Heterozygous CTC subset of CPP |
| chr9 | 139733496 | G | C,G | G   | Heterozygous CTC subset of CPP |
| chr9 | 139744524 | C | C,T | C   | Heterozygous CTC subset of CPP |
| chr9 | 139815569 | C | C   | C   | Heterozygous CTC subset of CPP |
| chr9 | 139836694 | C | C   | C   | Heterozygous CTC subset of CPP |
| chr9 | 139917254 | C | C   | C   | Heterozygous CTC subset of CPP |
| chr9 | 139964382 | G | G   | G   | Heterozygous CTC subset of CPP |
| chr9 | 139964447 | G | C,G | C,G | Heterozygous CTC subset of CPP |
| chr9 | 139964450 | C | C,T | C,T | Heterozygous CTC subset of CPP |
| chr9 | 139996109 | G | G   | G   | Heterozygous CTC subset of CPP |
| chr9 | 140002995 | C | C,T | C   | Heterozygous CTC subset of CPP |
| chr9 | 140006202 | G | A,G | A,G | Heterozygous CTC subset of CPP |
| chr9 | 140007730 | C | C   | C   | Heterozygous CTC subset of CPP |
| chr9 | 140008934 | A | A,G | A,G | Heterozygous CTC subset of CPP |
| chr9 | 140078185 | G | G   | G   | Heterozygous CTC subset of CPP |
| chr9 | 140079522 | G | A,G | A,G | Heterozygous CTC subset of CPP |
| chr9 | 140080692 | A | A   | A   | Heterozygous CTC subset of CPP |
| chr9 | 140167022 | G | A,G | G   | Heterozygous CTC subset of CPP |
| chr9 | 140348271 | C | C   | C   | Heterozygous CTC subset of CPP |
| chr9 | 140348272 | G | G   | G   | Heterozygous CTC subset of CPP |
| chr9 | 140611436 | T | C,T | T   | Heterozygous CTC subset of CPP |
| chr9 | 140637863 | G | G   | G   | Heterozygous CTC subset of CPP |
| chr9 | 140638461 | T | C,T | T   | Heterozygous CTC subset of CPP |
| chr9 | 140657135 | A | A   | A   | Heterozygous CTC subset of CPP |

| Category                             | Count     | Percent Total | Percent Total by concordance |
|--------------------------------------|-----------|---------------|------------------------------|
| Homozygous reference CPP equals CTC  | 5,799,731 | 99.851%       |                              |
| Homozygous variant CPP equals CTC    | 852       | 0.015%        |                              |
| Heterozygous CTC subset of CPP       | 6470      | 0.111%        | 99.977% Concordant           |
| Homozygous variant CPP NOT equal CTC | 215       | 0.004%        |                              |
| Heterozygous CTC NOT subset of CPP   | 1104      | 0.019%        | 0.023% Discordant            |

Total bases profiled 5,808,372
