# Supplementary material for: Circulating tumour cells from patients with colorectal cancer have cancer stem cell hallmarks in ex vivo culture
Source: PubMed Central journal article supplement — Gut. 2016 Jul 25;66(10):1802–10. doi: 10.1136/gutjnl-2016-311447 (PMC5595103; doi:10.1136/gutjnl-2016-311447), 2016-07-25
Supplement: gutjnl-2016-311447supp006.pdf [file gutjnl-2016-311447supp006.pdf]

| <b>Name of the primer</b> | <b>forward</b>          | <b>reverse</b>          |
|---------------------------|-------------------------|-------------------------|
| GAPDH                     | GGTGGTCTCCTCTGACTTCAACA | GTTGCTGTAGCCAAATTCGTTGT |
| CD26                      | AGTGGCACGGCAACACATTG    | TCCCGATGACTTCCCAGGTG    |
| CD44                      | CAATAGCACCTTGCCCACAAT   | AATCACCACGTGCCCTTCTATG  |
| ABCG2                     | TGCAACATGTA CTGGCGAAGA  | TCTTCCACAAGCCCCAGG      |
| ALDH1A1                   | TCCTGGTTATGGGCCTACAG    | CAACAGCATTGTCCAAGTCG    |
| MDR1                      | GGTGCTGGTTGCTGCTTACA    | TGGCCAAAATCACAAGGGT     |
| UGT1A1                    | AAATCCACTATCCCAGGAAT    | AGTATCGTGTTGTTTCGCAAG   |
| UGT1A                     | AAATCCACTATCCCAGGAAT    | AGTATCGTGTTGTTTCGCAAG   |
| TYMS                      | GGCCTCGGTGTGCCTTT       | GATGTGCGCAATTCATGTACGT  |
